# Supplementary material for: Predicting the roughness length of turbulent flows over landscapes with multi-scale microtopography
Source: Copernicus journal article supplement (doi:10.5194/esurf-4-391-2016), 2016-05-19
Supplement: Supplementary file 1 [file windprofiles.xlsx]

## Sheet: deathvalleyrough
1.09045	1.62375	1.86508	1.6	2.55	2.7	3.1
0.618279	0.76231	0.847975	1.1	1.75	1.95	2.65
0.339726	0.387703	0.452402	0.75	1.55	1.95	2.8
0.478769	0.431984	0.556501	1	2.05	2.5	3.05
0.683502	0.607627	0.736524	1.25	2.3	2.6	3
0.748107	0.806354	0.856394	1.4	2.25	2.45	2.85
0.477425	0.575937	0.661656	1.2	2	2.3	2.5
0.260195	0.325985	0.482479	1	1.8	2.05	2.2
0.258616	0.354505	0.530922	1	1.55	1.8	1.75
0.20879	0.309139	0.455098	0.8	1.15	1.5	1.4
0.143228	0.212887	0.300556	0.6	1	1.2	1.35
0.133272	0.179967	0.228005	0.5	1.2	1.35	1.55
0.251658	0.310868	0.350418	0.7	1.75	2.1	2.4
0.469543	0.549795	0.672819	1.25	2.45	2.95	3.15
0.59632	0.679337	0.898174	1.6	2.65	3.05	3.3
0.454542	0.55446	0.716514	1.5	2.3	2.65	3.15
0.275336	0.397876	0.486684	1.25	2.05	2.35	2.8
0.267639	0.402996	0.466896	1.1	1.9	2.15	2.65
0.382889	0.518154	0.698638	1.25	2.25	2.65	3.2
0.633984	0.757575	1.1605	1.8	3.1	3.7	4.4
0.724756	0.819613	1.19526	2.05	3.15	3.8	4.7
0.760209	0.88121	1.50478	1.8	2.85	3.45	4.1
0.975976	1.18892	1.9584	1.95	3.15	3.65	4.45
0.923618	1.12315	1.82814	2.1	3.4	3.9	4.8
0.802425	0.971463	1.7451	1.8	3.3	3.85	4.4
0.838328	1.01627	1.86126	1.65	3.4	3.75	4.2
0.743799	0.84549	1.56199	1.75	3.2	3.75	4.25
0.732053	0.769672	1.21513	1.9	2.95	3.65	4.35
0.787499	0.946121	1.50121	1.75	2.75	3.35	4.15
0.693548	0.947316	1.48993	1.35	2.4	3.1	3.75
0.547452	0.749063	1.3152	1.1	2.15	2.7	3.15
0.376646	0.522216	0.982432	0.95	1.85	2.2	2.5
0.474747	0.689197	0.855749	1.15	2.35	2.75	3
0.696201	1.03361	1.39215	1.55	2.9	3.4	3.75
0.71309	1.11951	1.62102	1.6	2.75	3.25	3.65
0.623698	0.955788	1.38893	1.4	2.6	3.2	3.45
0.615248	0.808956	1.28152	1.3	2.7	3.3	3.7
0.701438	0.928538	1.31477	1.3	2.9	3.45	4.15
0.748508	1.0803	1.56185	1.45	3.3	3.85	4.3
0.73323	1.00188	1.36878	1.45	3.25	3.6	3.85
0.712717	0.877326	1.08184	1.35	2.7	3	3.35
0.66765	0.966363	1.49791	1.4	2.45	2.75	2.95
0.557468	0.901213	1.50423	1.3	2.5	2.6	2.7
0.475979	0.79467	1.24818	1.15	2.2	2.25	2.5
0.388316	0.725872	1.1842	1.05	1.65	1.7	2
0.337026	0.603566	1.08374	0.9	1.35	1.45	1.8
0.295902	0.500614	0.868204	0.7	1.2	1.6	1.8
0.183195	0.374632	0.709001	0.45	1.4	1.55	1.8
0.365733	0.698925	1.37201	1	1.9	2.1	2.2
0.386035	0.615121	0.827759	1.05	2.4	2.85	3.1
0.559759	0.830599	1.11116	1.3	3.35	3.8	4.2
0.643196	0.972567	1.34237	1.5	3.45	3.8	4.15
0.598716	0.934876	1.29428	1.45	2.95	3.45	3.85
0.692464	1.10221	1.69638	1.55	3	3.75	4.2
0.937491	1.38558	2.22558	2	3.45	4.1	4.55
1.09047	1.53654	2.24233	2.35	4	4.55	5.05
1.04809	1.60559	2.27897	2.25	3.95	4.65	5.2
0.903324	1.46317	2.54357	2.1	3.55	4.2	4.9
1.04395	1.50082	2.78123	2.4	3.65	4.2	4.8
1.10731	1.70268	2.85711	2.5	3.65	4.2	4.6
0.84107	1.5585	2.75253	2.05	3.3	3.8	4.15
0.75669	1.43548	2.69945	1.9	3.35	4.05	4.15
0.831629	1.50542	2.89822	2	3.5	4.3	4.35
0.754885	1.42547	2.91254	1.9	3.5	4.1	4.65
0.840442	1.42947	2.72785	2	3.5	4	4.55
0.773274	1.42244	2.62665	1.85	2.9	3.2	3.35
0.590732	1.11566	2.12275	1.55	2.45	2.85	3.2
0.450719	0.867316	1.75136	1.2	2.2	3	3.55
0.468569	0.865628	1.92499	1.35	2.5	3.4	3.8
0.63164	1.01008	1.92229	1.5	2.6	3.3	3.65
0.630401	0.928702	1.38905	1.25	2.35	3	3.35
0.612772	0.869476	1.36299	1.25	2.4	2.9	3.15
0.578913	0.849245	1.4689	1.25	2.25	2.55	2.8
0.461749	0.743368	1.35918	1	1.7	2.1	2.4
0.412682	0.660785	1.07595	0.9	1.75	2.2	2.45
0.377444	0.693647	1.14562	0.8	1.35	1.6	1.55
0.289046	0.445619	0.83808	0.75	1.2	1.4	1.6
0.247186	0.402194	0.787787	0.7	1.3	1.55	1.9
0.314748	0.603457	0.970635	0.75	1.75	2.2	2.4
0.530825	0.948023	1.70021	1.3	2.45	2.95	3.1
0.521236	0.903488	1.77663	1.4	2.4	2.75	2.85
0.413153	0.766188	1.33155	1.2	2.05	2.4	2.45
0.414229	0.726817	1.08974	1.15	1.75	2.2	2.25
0.425712	0.744016	1.2066	1.05	1.8	2.25	2.45
0.454785	0.829723	1.57371	1.2	2.15	2.45	2.55
0.429593	0.802379	1.54895	1.2	2.25	2.6	2.7
0.466389	0.80997	1.31103	1.15	2.35	2.7	2.95
0.52776	0.907521	1.18486	1.2	2.35	2.55	2.65
0.461684	0.817363	0.970186	1.05	2.1	2.3	2.35
0.361633	0.604174	0.752174	0.85	1.9	2.3	2.45
0.32838	0.550349	0.72632	0.8	2	2.3	2.4
0.257465	0.43242	0.534721	0.65	1.7	1.8	1.95
0.0566631	0.0928257	0.15823	0.15	0.95	1	1
0.145255	0.213436	0.331253	0.35	0.85	1	1.3
0.305725	0.464625	0.773056	0.7	1.4	1.55	1.6
0.449777	0.855112	1.52402	1.05	1.65	1.9	2.25
0.45268	0.962003	1.87439	1.15	2.15	2.35	2.8
0.406318	0.792858	1.24006	1.05	1.85	2.05	2.65
0.450114	0.695844	1.1212	1.15	2.15	2.4	2.6
0.371795	0.495838	0.8811	1	1.6	1.65	1.75
0.140485	0.228211	0.411064	0.3	1.05	1.35	1.45
0.156371	0.206795	0.258255	0.35	1.15	1.1	1.7
0.253598	0.352424	0.409594	0.7	1.45	1.45	2
0.308333	0.454463	0.571279	0.9	1.9	2	2.15
0.396793	0.598442	0.79514	0.9	1.8	1.95	1.9
0.340004	0.558447	0.77049	0.7	1.35	1.4	1.4
0.0723366	0.112907	0.129485	0.3	0.65	0.95	1.65
0.125948	0.195964	0.245787	0.6	1.45	1.85	2.4
0.17622	0.242993	0.306479	0.8	1.95	2.25	2.6
0.232774	0.324391	0.370275	0.95	1.9	2.05	2.5
0.295358	0.392619	0.467908	1.1	1.85	2	2.35
0.304141	0.398936	0.523209	1.1	2	2.15	2.35
0.260907	0.386139	0.487665	1	2.35	2.5	3.05
0.370421	0.524177	0.647721	1.55	3.25	3.35	3.7
0.621857	0.770736	0.951184	1.95	3.55	3.75	3.75
0.633212	0.777137	0.934569	1.7	2.95	3.4	3.45
0.40759	0.533846	0.630989	1.3	2.3	3	3.3
0.433026	0.526086	0.698045	1.3	2.3	3.2	3.65
0.574017	0.669324	0.855907	1.6	2.8	3.55	3.95
0.592534	0.691117	0.86542	1.65	2.75	3.25	3.75
0.436458	0.552946	0.695724	1.4	2.25	2.6	3.15
0.308804	0.427678	0.490726	1.15	2.05	2.2	2.45
0.370226	0.457523	0.550588	0.95	1.75	1.8	1.9
0.35708	0.444076	0.518504	0.75	1.25	1.55	1.9
0.228706	0.303592	0.425741	0.6	1.2	1.85	2.4
0.248895	0.331849	0.453181	0.8	1.95	2.45	2.85
0.271775	0.380498	0.446629	1.05	2.35	2.55	2.8
0.2285	0.337662	0.419898	1.1	2.2	2.35	2.7
0.244851	0.359812	0.425895	1.15	2.15	2.15	2.4
0.175893	0.255113	0.299766	0.75	1.75	1.75	1.85
0.0896514	0.127336	0.157613	0.35	1.35	1.45	1.7
0.0903632	0.121268	0.164439	0.35	1.25	1.35	1.85
0.148019	0.175393	0.266455	0.55	1.45	1.5	1.8
0.198111	0.251007	0.371963	0.6	1.35	1.35	1.3
0.123769	0.194816	0.238969	0.4	1.05	1.1	1.3
0.129879	0.201434	0.214608	0.25	0.65	0.7	0.7
0.0861791	0.13573	0.148368	0.35	1.3	1.5	1.35
0.177012	0.259014	0.369176	0.7	1.55	1.65	1.55
0.116086	0.158837	0.274579	0.45	1.3	1.35	1.4
0.0813378	0.118052	0.128599	0.2	0.9	0.95	0.85
0.0411111	0.0645322	0.0750292	0.15	0.8	1.2	1.3
0.169558	0.248995	0.33424	0.55	1.4	1.7	1.75
0.258249	0.360852	0.438973	0.7	1.45	1.55	1.65
0.248394	0.374704	0.379549	0.5	1.2	1.25	1.55
0.104607	0.194311	0.173333	0.2	1.05	1.2	1.6
0.312676	0.607221	0.514603	0.55	1.4	1.6	2
0.261061	0.488654	0.494462	0.6	1.05	1.35	1.95
0.135945	0.202938	0.26738	0.6	1.1	1.45	1.95
0.141621	0.198767	0.259349	0.6	1.25	1.45	2.25
0.22001	0.294352	0.356639	0.8	1.9	2.05	2.65
0.25782	0.344973	0.435694	1.05	2.25	2.3	2.35
0.291349	0.373215	0.429705	0.9	1.75	1.7	1.75
0.0757146	0.0991682	0.121368	0.25	0.8	0.75	1.55
0.153932	0.190446	0.287057	0.25	1.15	1.35	1.75
0.347677	0.436061	0.686278	0.7	1.85	2.15	2.35
0.439233	0.52247	0.962114	0.95	1.8	2.05	2.2
0.336914	0.399089	0.707577	0.75	1.3	1.55	1.75
0.201851	0.257404	0.327518	0.55	1.1	1.3	1.5
0.169658	0.213715	0.30566	0.45	1.15	1.35	1.6
0.168879	0.229978	0.297128	0.45	1.35	1.65	1.95
0.19755	0.280433	0.33651	0.65	1.45	1.7	1.9
0.212013	0.278505	0.357193	0.65	1.25	1.6	1.75
0.250544	0.30311	0.511001	0.5	1.2	1.6	1.75
0.244949	0.302462	0.527341	0.55	1.4	1.55	1.75
0.19835	0.259882	0.382798	0.55	1.4	1.65	1.8
0.294504	0.477113	0.660127	0.7	1.5	1.8	1.95
0.362031	0.572401	0.889873	0.9	1.6	1.7	1.9
0.225397	0.281893	0.357191	0.4	1.3	1.7	1.95
0.320646	0.391675	0.514727	0.6	1.45	1.7	2.2
0.46759	0.575002	0.6912	0.85	2.15	2.7	3.2
0.797213	0.9781	1.17249	1.3	2.75	3.6	4.3
0.904043	1.06732	1.35995	1.65	3.3	3.85	4.8
0.825355	1.00703	1.29453	1.65	3.45	3.85	4.4
0.682052	0.904093	1.17207	1.4	2.7	3.35	4
0.777235	0.993251	1.28379	1.5	3	4.2	5.35
1.18843	1.72387	2.14374	2.25	4.25	5.65	6.65
1.33245	1.96364	2.65165	2.8	4.85	6.25	6.85
1.16632	1.51979	2.30252	2.6	4.75	6.05	6.75
1.21695	1.67387	2.29361	2.55	4.7	5.7	6.4
1.32576	1.90714	2.67184	2.55	4.7	5.85	6.9
1.34502	1.76466	2.54885	2.3	4.95	5.95	7.15
1.46498	1.76137	2.31308	2.45	5.1	6.1	7.4
1.36126	1.70594	2.25487	2.55	4.95	6.2	7.85
1.33394	1.70668	2.10574	2.4	4.8	6	7.65
1.37652	1.56349	1.85481	2.45	4.7	6.15	8.05
1.33205	1.59407	2.15226	2.55	4.8	6.5	8.25
1.27852	1.70267	2.52506	2.5	5.05	6.4	7.4
1.15731	1.46128	2.19435	2.35	5	6.2	6.85
1.25329	1.58425	2.1196	2.3	4.85	6.05	6.9
1.12379	1.53113	2.09015	2.15	4.55	5.65	6.55
0.978612	1.36216	1.88804	2.1	4	5.2	6.25
1.26067	1.88648	2.73296	2.55	4.4	5.65	6.9
1.36217	2.21437	3.80207	3	5.3	6.75	8.1
1.28755	2.09637	4.39559	3	5.55	6.9	8.4
1.38385	2.15396	4.64097	2.95	5.2	6.25	8
1.38349	2.16969	4.14941	2.9	4.6	5.55	7
1.30795	1.97074	3.07137	2.55	4.25	5.35	6.2
1.31092	2.05306	2.90935	2.7	5.1	6.15	6.85
1.51135	2.32898	3.55461	3.45	5.95	7.15	8
1.82641	2.74706	4.21326	3.9	6.3	7.6	8.35
1.97549	3.05667	4.45118	4.2	6.7	7.85	8.85
1.76011	2.61994	3.81232	3.75	6.45	7.8	9.4
1.52441	2.40693	3.87822	3.2	5.95	7.3	8.7
1.40896	2.21273	3.38067	2.9	5.3	6.9	7.85
1.53389	2.00736	2.84464	2.9	5.35	6.75	7.45
1.62804	2.12208	3.25421	3.15	5.55	6.75	7.8
1.47313	2.12226	3.45493	3.15	5.35	6.75	8
1.50576	2.15406	3.41643	3.2	5.1	6.5	7.65
1.39764	1.96451	2.92794	2.85	5.05	6.65	7.6
1.10121	1.52295	2.10963	2.4	4.9	6.3	7.25
0.993043	1.28825	1.63482	2.15	4.65	5.65	6.75
1.18323	1.61952	2.07094	2.6	4.95	5.55	6.85
1.21941	1.81094	2.26683	2.7	4.5	5.4	7.15
1.08608	1.61417	2.09158	2.25	4.2	5.5	6.8
1.00413	1.46448	2.15624	2.1	4.4	5.35	6.1
1.15649	1.6786	2.57674	2.35	4.75	5.7	6.4
1.34542	1.85326	2.78906	2.7	5.1	6.15	7.15
1.23111	1.7208	2.30844	2.55	4.95	5.9	7.35
1.18209	1.6864	2.1586	2.7	5.15	6.35	7.9
1.38672	1.91835	2.4719	2.9	5.4	6.55	7.55
1.27954	1.7681	2.25429	2.45	4.9	5.9	6.65
0.969947	1.39392	1.80446	1.95	4.4	5.8	6.5
1.2578	1.90103	2.33907	2.5	4.65	5.8	6.4
1.48907	2.14007	3.30909	3	4.45	5.3	6.05
1.11945	1.60253	2.99972	2.35	3.85	4.75	5.7
0.846037	1.2538	2.01486	1.85	3.55	4.35	5.3
0.765184	1.1303	1.60454	1.6	3.1	4	4.95
0.837374	1.32308	2.08119	1.7	3.5	4.75	5.8
0.944848	1.4695	2.43851	2.05	4.35	5.55	6.2
0.959324	1.4309	2.19741	2.3	4.45	5.4	6.3
1.10317	1.50492	2.09458	2.45	4.55	5.65	7.15
1.29901	1.66104	2.19691	2.7	5.15	6.3	7.65
1.2495	1.63503	2.2227	2.7	4.9	5.8	6.65
1.04766	1.41799	2.11972	2.3	3.8	4.65	5.35
1.05528	1.68893	3.11359	2.35	3.9	4.75	5.55
1.36766	2.20794	4.28816	2.75	4.55	5.45	6.25
1.28456	2.06002	4.23083	2.75	4.55	5.5	6.45
0.852571	1.45993	3.51299	2.35	4.25	5.05	6
0.751022	1.2489	3.1039	2.3	3.9	4.8	5.45
0.789032	1.35634	3.24435	2.3	3.75	4.45	4.9
0.907252	1.55339	3.34523	2.2	3.55	4.2	4.8
0.924525	1.70134	3.10109	2.1	3	3.75	4.65
0.835858	1.49676	2.53368	1.95	3.05	3.65	4.25
0.846307	1.38909	2.44667	1.85	3.25	3.85	4.2
0.97239	1.60655	3.17452	2.1	3.6	4.35	5.1
0.998295	1.65954	3.12914	2.2	3.9	4.9	5.95
1.07734	1.75701	2.57805	2.15	4	4.85	5.65
1.03485	1.62496	2.11649	2.05	3.7	4.3	4.7
0.940949	1.42843	1.91017	2	3.3	3.9	4.55
1.04535	1.46722	1.89668	2.05	3.2	3.8	4.55
0.910238	1.33977	1.70397	1.85	3.2	3.95	4.35
0.803542	1.27042	1.82585	1.85	3.4	4.2	4.65
0.685665	1.04072	1.53909	1.75	3.15	3.7	4
0.675468	0.951547	1.54234	1.8	3.25	3.9	4.2
0.745112	1.01561	1.71722	1.8	3.55	4.4	4.65
0.705595	0.935318	1.42697	1.65	3.75	4.7	5.15
1.13337	1.40439	1.96371	2.25	4.45	5.5	6.45
1.38439	1.70618	2.2478	2.75	4.75	5.6	6.6
1.0862	1.39405	1.81898	2.5	4.2	5.05	6.2
1.17549	1.5751	2.15008	2.55	4.5	5.65	6.95
1.33562	1.95463	2.5749	2.75	5.3	6.55	7.65
1.21978	1.84884	2.39213	2.55	5.1	6.15	6.95
1.08582	1.60366	2.12152	2.25	4.55	5.45	6.35
1.0152	1.43543	1.91159	2.1	4.25	5.3	6.3
0.906675	1.24345	1.6542	1.9	3.85	4.85	5.75
0.783784	1.11852	1.66792	1.75	3.6	4.5	5.75
0.933743	1.3163	2.00505	2.1	4.35	5.35	6.75
1.00972	1.40917	1.94162	2.3	5.25	6.2	7.15
1.14601	1.70478	2.32691	2.5	5.1	6.15	6.95
1.18505	1.85987	2.61595	2.45	4.45	5.6	6.25
0.930166	1.41896	1.93903	1.95	3.7	4.65	5.25
0.823132	1.0865	1.47604	1.75	3.6	4.3	4.95
1.03977	1.2408	1.96424	2.2	4.45	5.1	5.95
1.21323	1.56935	2.81432	2.65	4.75	5.5	6.7
1.05179	1.40543	2.54468	2.35	4.05	4.95	6.15
0.794881	1.10492	1.71437	1.9	3.65	4.45	5.25
0.754723	1.10117	1.53528	1.7	3.6	4.35	4.85
0.85342	1.31848	1.8331	1.75	3.65	4.7	5.45
0.868511	1.48307	1.99453	1.85	3.95	5.35	6.3
1.13026	1.7237	2.38873	2.25	4.05	5.4	6.2
1.19976	1.74597	2.39434	2.35	4.05	5.05	5.7
1.05544	1.46277	1.90683	2.2	4.35	5.55	6.55
1.13468	1.51018	1.97171	2.55	5	6.2	7.3
1.07092	1.57181	2.13715	2.45	4.9	5.95	6.85
1.00156	1.44022	1.92208	2.1	4.3	5.35	6.3
0.956553	1.30614	1.70074	1.95	3.9	4.6	5.65
0.859914	1.15325	1.50758	1.75	3.3	4.05	5.3
0.853075	1.06956	1.21322	1.6	3.1	4	4.9
0.735624	0.916381	1.06133	1.4	3	3.55	3.9
0.532648	0.772602	1.09369	1.2	2.85	3.2	3.4
0.668009	1.00191	1.50318	1.4	2.75	3.35	4
0.833065	1.18566	1.73784	1.6	2.8	3.65	4.4
0.770636	1.14316	1.55098	1.65	3.1	3.8	4.3
0.763098	1.17248	1.48437	1.75	3.1	3.55	4.15
0.928883	1.38367	1.7725	1.95	3.05	3.45	3.95
0.922529	1.44342	1.87171	1.9	2.7	3.15	3.6
0.666085	1.09179	1.53179	1.4	2.4	3.05	3.5
0.710716	1.1261	1.58586	1.4	2.7	3.65	4.25
0.856496	1.25959	1.79996	1.7	3.2	4.15	5
0.903771	1.38417	2.14103	1.95	3.5	4.15	4.8
0.826984	1.41075	2.13116	1.9	3.3	3.8	4.3
0.673803	1.10523	1.66323	1.6	3.15	3.85	4.55
0.736351	1.06059	1.51578	1.65	3.2	3.9	4.5
0.780834	1.07644	1.45681	1.65	2.85	3.4	3.95
0.726371	1.11134	1.53919	1.55	2.85	3.5	4.15
0.790565	1.22652	1.49372	1.7	2.95	3.4	4
0.730414	1.08412	1.14494	1.65	2.65	3.1	4.05
0.746893	1.12686	1.35749	1.55	3.1	3.8	4.9
0.843431	1.39093	1.89565	1.75	3.85	4.75	5.65
0.845662	1.47986	2.12148	2.1	4.2	5.05	5.75
1.07414	1.63622	2.45172	2.35	4.25	4.85	5.35
1.15713	1.62074	2.54105	2.35	4	4.5	5
0.817414	1.21986	1.88622	1.85	3.15	3.85	4.7
0.560265	0.841856	1.24208	1.35	2.85	3.55	4.4
0.60213	0.817425	1.14822	1.4	3.3	3.85	4.35
0.686781	0.880937	1.19432	1.45	3.25	4	4.55
0.861129	1.11838	1.66533	1.65	3.5	4.2	5.35
1.01739	1.30459	1.98796	2.05	3.9	4.9	6.45
0.283569	0.319773	0.524465	0.9	1.9	2.25	2.8
0.180102	0.218054	0.400241	0.75	1.55	1.9	2.55
0.235022	0.29335	0.462303	0.75	1.65	2.15	3.1
0.26516	0.317653	0.491261	0.85	1.85	2.5	3.5
0.243404	0.298541	0.466442	1	1.95	2.4	3.1
0.246575	0.309894	0.499557	1.15	2.05	2.25	3.1
0.251657	0.293168	0.581676	1.25	1.95	2.4	3.3
0.236339	0.278985	0.585437	1.15	2	2.85	3.65
0.244365	0.262471	0.489731	1.1	2.2	2.85	3.7
0.314482	0.357192	0.574504	1.35	2.5	3	3.6
0.391998	0.482759	0.774804	1.5	2.8	3.3	3.8
0.366848	0.46125	0.741457	1.35	2.55	2.8	3.5
0.295807	0.396441	0.609058	1.1	2.2	2.7	3.75
0.360142	0.459153	0.792858	1.4	2.75	3.55	4.65
0.492229	0.584652	1.0377	1.85	3.25	4.05	4.9
0.403832	0.483983	0.828606	1.55	2.9	3.55	4.3
0.248959	0.33338	0.586844	1.15	2.4	2.75	3.6
0.3087	0.385401	0.628224	1.35	2.65	3.05	3.6
0.29681	0.354614	0.589081	1.3	2.9	3.45	4.2
0.178084	0.207886	0.405333	0.85	2.5	3.2	4.6
0.277094	0.283066	0.55092	1.1	2.6	3.5	4.7
0.47516	0.515611	0.869258	1.75	3.25	4.45	5.2
0.486026	0.586566	0.897103	1.8	3.45	4.6	5.25
0.430376	0.559061	0.92865	1.7	3.2	4.05	5.1
0.484228	0.595047	0.985761	1.85	3.2	4.05	5.25
0.54831	0.614841	1.07009	2.05	3.3	4.05	4.95
0.511358	0.619993	1.08832	2	3.1	3.75	4.75
0.496062	0.76106	1.1655	1.95	3.15	3.8	4.7
0.542434	0.808152	1.20218	1.85	2.95	3.65	4.7
0.425634	0.548667	0.887252	1.55	2.65	3.55	4.9
0.3231	0.40779	0.788671	1.6	3.05	4	4.95
0.416154	0.559443	1.03316	1.8	3.1	3.9	4.7
0.401085	0.576579	1.05241	1.7	2.7	3.35	4.25
0.304765	0.449936	0.891037	1.55	2.75	3.4	4.2
0.351979	0.451149	0.831406	1.65	3	3.8	4.45
0.40383	0.501247	0.855922	1.8	3.15	4	4.75
0.347462	0.463758	0.904139	1.9	3	3.8	4.95
0.293634	0.381828	0.751972	1.75	2.85	3.8	4.95
0.295762	0.348743	0.637531	1.65	3.15	4.15	5.2
0.354745	0.364972	0.702824	1.9	3.25	4	5.35
0.39411	0.385601	0.774755	2.05	3.25	3.75	5.1
0.347087	0.380158	0.804696	1.85	3.2	3.8	4.85
0.354878	0.516436	0.967388	1.8	3.2	3.9	4.75
0.48605	0.673363	1.07141	2.1	3.3	4.05	5.1
0.523724	0.612654	0.951619	2.15	3.15	3.9	5.3
0.605543	0.567063	0.842027	2	3.05	3.6	4.9
0.554232	0.531522	0.783266	1.8	2.9	3.4	4.75
0.388388	0.488857	0.870498	1.7	3.1	3.7	4.85
0.43204	0.54014	0.96505	1.75	3.25	3.75	4.5
0.386531	0.505523	0.805801	1.5	2.8	3.3	4.4
0.404227	0.510045	0.824076	1.6	3	3.75	4.8
0.435221	0.518069	0.928645	1.75	3.25	3.95	4.5
0.380051	0.476794	0.866239	1.65	2.85	3.4	4
0.330669	0.388566	0.680377	1.45	2.25	2.7	3.55
0.257208	0.297346	0.48951	1.15	1.85	2.3	3.15
0.329767	0.412935	0.640691	1.3	2.35	3	3.7
0.399115	0.451353	0.784029	1.6	2.95	3.6	4.1
0.387498	0.445927	0.824555	1.6	2.85	3.1	3.6
0.343282	0.427079	0.73779	1.35	2.45	2.75	3.55
0.329965	0.364182	0.548761	1.3	2.45	2.9	4
0.399422	0.465748	0.717536	1.55	3	3.55	4.45
0.38788	0.508447	0.955368	1.75	3.3	3.9	4.45
0.30309	0.381946	0.83638	1.65	3.05	3.45	4.05
0.284012	0.328473	0.671766	1.45	2.5	2.9	3.65
0.35999	0.410535	0.613631	1.5	2.55	3.15	3.75
0.456683	0.500772	0.71775	1.8	2.95	3.65	4
0.425854	0.485447	0.774214	1.9	2.95	3.3	3.75
0.333292	0.395609	0.624809	1.6	2.5	2.75	3.55
0.329745	0.442801	0.653708	1.35	2.2	2.85	4.15
0.411624	0.587069	0.93346	1.65	3	3.95	5.05
0.519889	0.734538	1.22952	2.15	3.55	4.4	5
0.466322	0.641607	1.09595	2	3.3	4	4.75
0.440257	0.575494	0.965731	1.75	3.1	3.85	4.95
0.506199	0.675261	1.07423	1.8	3	3.75	4.8
0.492506	0.681431	1.08644	1.85	2.95	3.7	4.35
0.389195	0.510225	0.921223	1.7	2.8	3.5	4.4
0.328874	0.405819	0.795256	1.5	2.9	3.55	4.45
0.391328	0.492359	0.867006	1.75	3.35	4.2	4.9
0.525207	0.683948	1.13572	2.25	3.65	4.4	5.35
0.525474	0.767058	1.26373	2.35	3.7	4.55	5.65
0.538055	0.81665	1.28586	2.35	3.6	4.65	5.7
0.53216	0.707365	1.25861	2.35	3.75	4.65	5.65
0.368923	0.412625	0.952261	2	3.65	4.3	5.25
0.320546	0.383588	0.724383	1.6	2.9	3.55	4.4
0.330223	0.432062	0.743596	1.6	2.9	3.85	4.65
0.374284	0.528519	0.896479	1.8	3.25	4.3	5.05
0.427846	0.605518	0.940905	1.7	3.25	4.05	4.75
0.38834	0.495849	0.860678	1.55	3	3.55	4.3
0.387568	0.428889	0.856355	1.9	2.9	3.35	4.05
0.457448	0.514427	0.855714	2.15	2.95	3.45	4.3
0.46739	0.514916	0.806821	2.05	3.1	3.75	4.8
0.518971	0.622676	1.01496	2.25	3.55	4.2	4.85
0.532891	0.680393	1.0573	2.1	3.45	4.2	4.9
0.459731	0.612209	1.01039	2	3.45	4.15	5.2
0.401388	0.574813	1.03625	2.1	3.45	4.05	5.2
0.347372	0.473612	0.834284	1.75	3.15	3.85	4.95
0.373965	0.404633	0.555318	1.55	2.95	3.6	4.55
0.391846	0.389435	0.520178	1.6	2.9	3.4	4.05
0.356036	0.388062	0.632803	1.6	2.7	3.2	3.7
0.352038	0.436945	0.680029	1.45	2.35	2.8	3.4
0.338371	0.447359	0.645653	1.2	2.25	2.85	3.65
0.322485	0.421668	0.682736	1.3	2.45	3.2	3.95
0.29853	0.339747	0.609825	1.3	2.3	2.85	3.45
0.269313	0.27313	0.456364	1.15	2.15	2.45	3.15
0.28549	0.320103	0.52829	1.25	2.5	2.85	3.5
0.317148	0.388197	0.691188	1.35	2.35	2.95	3.45
0.320121	0.380905	0.73612	1.45	2.4	2.95	3.55
0.316142	0.357071	0.701848	1.65	2.8	3.4	4.05
0.348985	0.4665	0.87323	1.9	3.1	3.65	4.2
0.448594	0.610671	1.03496	2.15	3.5	4	4.6
0.4556	0.592337	0.962744	2	3.35	4.05	4.8
0.415398	0.520127	0.82179	1.65	3	3.85	4.7
0.477478	0.524491	0.827496	1.85	3.3	3.95	4.65
0.417804	0.42995	0.753599	1.8	3	3.65	4.3
0.401786	0.515268	0.88371	1.6	2.7	3.55	4.2
0.523117	0.655392	1.10573	1.9	3.25	3.9	4.65
0.523686	0.590161	1.01101	2	3.4	4	5
0.437349	0.555088	1.01768	1.85	3.15	3.95	4.7
0.324592	0.420143	0.773899	1.55	2.7	3.6	4.05
0.268908	0.342542	0.531426	1.15	2.45	3.3	4.25
0.253807	0.344462	0.603769	1.1	2.65	3.45	4.45
0.336054	0.344407	0.641079	1.55	2.9	3.3	3.7
0.397476	0.3977	0.768788	1.75	2.85	3.1	3.7
0.355457	0.428171	0.845619	1.6	2.7	3.25	4.1
0.33407	0.383443	0.674328	1.45	2.35	3	3.65
0.394215	0.434955	0.691142	1.35	2.35	2.9	3.65
0.464076	0.593396	0.936197	1.45	2.65	3.35	4.2
0.350685	0.462492	0.744385	1.3	2.5	3.15	4.2
0.325454	0.412458	0.676896	1.35	2.6	3	3.95
0.386518	0.461001	0.75659	1.55	2.7	3.3	4.15
0.458493	0.505577	0.888851	1.8	3.15	3.95	4.75
0.479786	0.590506	1.06635	1.95	3.4	4.05	4.7
0.352842	0.470018	0.794072	1.5	2.7	3.3	4.05
0.304597	0.36692	0.614969	1.25	2.2	2.8	3.75
0.304515	0.307574	0.465477	1.25	1.95	2.6	3.95
0.387248	0.369052	0.497957	1.4	2.4	2.85	3.85
0.41969	0.449512	0.712849	1.55	2.65	2.8	3.5
0.376446	0.472347	0.787336	1.55	2.25	2.8	3.5
0.397326	0.462369	0.730734	1.5	2.65	3.4	3.95
0.341946	0.392304	0.651181	1.35	2.9	3.45	4.25
0.339722	0.490164	0.83783	1.5	2.9	3.35	4.3
0.40512	0.566733	0.965191	1.75	3.15	3.65	4.55
0.407365	0.533119	0.928242	1.7	3.15	3.75	4.7
0.440482	0.588184	0.995972	1.85	3.2	3.8	4.6
0.366004	0.495869	0.883792	1.7	2.95	3.55	4.35
0.336433	0.463895	0.836792	1.5	3.05	3.65	4.4
0.436854	0.561411	0.921811	1.7	3.2	3.75	4.2
0.426182	0.546708	0.870475	1.65	2.75	3.45	3.95
0.364181	0.507893	0.839362	1.5	2.55	3.15	3.7
0.365483	0.49066	0.790647	1.4	2.5	2.8	3.5
0.374379	0.459697	0.733375	1.45	2.4	2.7	3.55
0.296414	0.362134	0.596673	1.35	2.25	2.6	3.5
0.299294	0.420124	0.624987	1.25	2.35	2.9	3.75
0.334499	0.454364	0.711251	1.35	2.55	3.35	3.95
0.309511	0.366558	0.679187	1.45	2.6	3.35	4.1
0.397958	0.340199	0.542244	1.5	2.65	3.05	4.1
0.39176	0.318821	0.424895	1.45	2.5	2.8	3.9
0.343933	0.349554	0.537052	1.45	2.3	2.75	3.55
0.348072	0.347164	0.536821	1.35	2.25	2.8	3.45
0.254111	0.271017	0.439663	1.05	2.1	2.85	3.8
0.24266	0.286227	0.562018	1.1	2.35	3.1	4.1
0.33372	0.415795	0.741655	1.35	2.55	3.2	3.9
0.3205	0.434434	0.685169	1.2	2.1	2.7	3.15
0.293142	0.406118	0.650287	1.1	2.2	2.55	2.9
0.315284	0.408598	0.667785	1.25	2.55	2.8	3.2
0.237347	0.295999	0.50628	1.15	2.25	2.65	3.1
0.211047	0.278618	0.428499	1	2.1	2.6	3.25
0.269478	0.366182	0.573368	1.2	2.35	2.95	3.85
0.2708	0.330469	0.579772	1.25	2.3	2.9	3.9
0.212537	0.238938	0.431401	0.95	1.9	2.5	3.65
0.214187	0.224757	0.424824	0.95	2	2.6	3.65
0.287975	0.273567	0.463424	1.35	2.7	3.35	4.2
0.382182	0.323375	0.503572	1.6	3.15	3.95	4.7
0.45285	0.449129	0.747083	1.9	3.45	4.5	5.25
0.438441	0.510712	0.8789	1.9	3.5	4.4	4.9
0.362882	0.389821	0.692861	1.4	3	3.4	3.8
0.368918	0.410468	0.714278	1.45	3	3.45	4.25
0.451941	0.588015	0.93812	1.75	3.1	3.6	4.45
0.444605	0.572865	0.901894	1.7	2.85	3.55	4.5
0.429272	0.578468	0.969412	1.9	3.05	3.85	4.65
0.352047	0.545384	0.906679	1.7	2.85	3.3	4.1
0.280266	0.379156	0.618938	1.4	2.6	3	4.05
0.346599	0.391171	0.649084	1.65	2.6	3.05	4.15
0.32871	0.354392	0.619562	1.55	2.45	3.1	4
0.38897	0.418139	0.649288	1.6	3	3.7	4.05
0.453845	0.513916	0.782257	1.7	3.25	3.65	4.05
0.396693	0.455482	0.810062	1.55	2.95	3.35	3.95
0.435249	0.432254	0.690915	1.6	2.75	3.1	3.55
0.372903	0.377931	0.589484	1.55	2.4	2.65	3.25
0.260389	0.317775	0.5962	1.3	2.35	2.75	3.55
0.240115	0.312101	0.532432	1.05	2.35	2.95	4.05
0.346553	0.472672	0.709864	1.3	2.55	3.2	4.3
0.416676	0.541972	0.811667	1.65	2.95	3.5	4.15
0.349043	0.453861	0.702799	1.65	2.8	3.3	3.95
0.302405	0.3949	0.650598	1.45	2.3	2.65	3.2
0.240515	0.289581	0.48183	1	2.15	2.5	3
0.246082	0.29383	0.560404	1.25	2.7	3.25	3.7
0.311019	0.337247	0.64758	1.65	2.8	3.3	3.75
0.310572	0.368177	0.578164	1.4	2.25	2.75	3.75
0.362112	0.47917	0.767247	1.45	2.5	3.2	4.5
0.439492	0.531499	0.879384	1.75	2.9	3.55	4.65
0.425382	0.517562	0.828577	1.75	2.85	3.5	4.25
0.448974	0.616721	0.940973	1.7	2.75	3.3	4
0.396424	0.58235	0.904	1.55	2.7	3.2	4.05
0.381738	0.507009	0.755648	1.4	2.95	3.8	4.45
0.437011	0.517274	0.779523	1.7	3.3	4	4.85
0.469025	0.498781	0.811162	2.1	3.45	3.9	4.9
0.416326	0.409542	0.659907	1.9	3.1	3.75	4.5
0.316577	0.318834	0.530824	1.6	2.65	3.5	4.3
0.371061	0.434965	0.745618	1.75	3.2	4	4.75
0.415595	0.557017	0.952347	2	3.65	4.6	5.55
0.406242	0.571527	1.02268	2.15	3.4	4.6	5.75
0.473586	0.666001	1.25867	2.35	3.65	4.7	5.8
0.506967	0.650838	1.22525	2.4	3.8	4.45	5.6
0.521877	0.654761	1.19553	2.3	3.85	4.2	5.5
0.543297	0.649728	1.24312	2.3	3.7	4.55	5.65
0.557383	0.516109	0.98929	2.35	3.4	4.35	5.1
0.492961	0.495622	0.867446	2.1	3.1	3.7	4.65
0.439309	0.535909	0.911994	1.95	3.1	3.75	4.65
0.499683	0.537563	0.865263	2.2	3.45	4.1	4.9
0.458998	0.467845	0.768563	2.15	3.4	4	4.9
0.44408	0.585744	0.911567	1.9	3.15	3.75	4.65
0.41844	0.583746	0.95155	1.7	2.9	3.6	4.65
0.306524	0.373298	0.737283	1.55	2.6	3.3	4.15
0.316393	0.32119	0.592482	1.55	2.65	3.25	3.95
0.364346	0.35281	0.614403	1.7	3.15	3.55	4.5
0.371116	0.412777	0.736233	1.75	3.3	3.7	4.85
0.381359	0.438147	0.802918	1.7	3.15	3.7	4.75
0.354092	0.362784	0.694852	1.7	3.15	3.75	4.45
0.331054	0.316068	0.610545	1.6	2.85	3.55	4.2
0.318918	0.303511	0.514078	1.5	2.55	3.25	4.1
0.365239	0.37648	0.535378	1.65	3	3.85	4.75
0.443767	0.518484	0.828609	1.9	3.4	4.3	5.15
0.476643	0.524527	0.923105	2.05	3.5	4.05	4.8
0.459742	0.476103	0.871826	1.95	3.35	3.8	4.3
0.400242	0.462028	0.892956	1.7	3.1	3.65	4.25
0.421484	0.499204	0.986839	1.8	3.2	3.75	4.5
0.427442	0.458342	0.84264	1.75	3.1	3.7	4.3
0.317967	0.327885	0.532626	1.3	2.55	3.25	3.75
0.249111	0.278197	0.448983	1.15	2.2	2.9	3.6
0.235036	0.247207	0.43944	1.15	2.25	3.1	3.75
0.22513	0.221383	0.402713	1.1	2.05	3	3.45
0.223913	0.23998	0.440627	1.1	1.85	2.55	3.15
0.23582	0.277086	0.48526	1.05	1.9	2.4	2.95
0.257197	0.334681	0.564018	1.1	1.9	2.35	3.05
0.219086	0.291674	0.535657	1.1	1.85	2.25	3.4
0.227772	0.248683	0.450549	1.15	2.15	2.6	3.65
0.275129	0.274603	0.477033	1.3	2.5	3.05	4
0.358116	0.348835	0.627833	1.75	3	3.5	4.35
0.430045	0.399059	0.706647	2.05	3.1	3.65	4.4
0.405358	0.413537	0.673491	1.8	2.75	3.35	4.1
0.410457	0.462243	0.756444	1.7	2.75	3.25	4
0.397009	0.45619	0.79839	1.7	2.75	3.4	4.2
0.358962	0.403307	0.707936	1.45	2.5	3.15	3.75
0.291363	0.298256	0.490659	1.1	2.25	2.65	3.45
0.313517	0.310686	0.576059	1.45	2.75	3.15	4.1
0.378946	0.392751	0.74999	1.8	3	3.6	4.05
0.364607	0.415099	0.725922	1.6	2.5	3.2	3.5
0.308384	0.346902	0.613747	1.4	2.3	3.05	3.55
0.285948	0.355419	0.578218	1.3	2.55	3.25	3.7
0.322188	0.388055	0.540542	1.3	2.55	3.05	3.45
0.293273	0.304119	0.465183	1.3	2.3	2.65	3.25
0.263181	0.274544	0.423097	1.25	2.2	2.55	3.3
0.271593	0.263965	0.381238	1.2	2.3	2.8	3.85
0.364443	0.359392	0.544294	1.55	2.85	3.35	4.35
0.418113	0.408298	0.607374	1.7	2.95	3.5	4.25
0.373853	0.429933	0.692648	1.55	2.9	3.5	4.1
0.317736	0.401851	0.656932	1.45	2.8	3.15	3.85
0.248935	0.281964	0.485169	1.25	2.4	2.75	3.65
0.241886	0.30117	0.556323	1.25	2.55	3.1	4.05
0.279775	0.310558	0.593318	1.4	2.55	3.1	4.3
0.320232	0.298212	0.573987	1.5	2.5	3	3.9
0.301392	0.303644	0.547161	1.45	2.5	2.95	3.75
0.234507	0.24759	0.422234	1.2	2.3	2.8	3.7
0.188496	0.201385	0.366962	1.05	2.2	2.7	3.65
0.182027	0.213151	0.375672	1	1.95	2.5	3.65
0.226045	0.248074	0.37146	0.95	2	2.7	3.6
0.299489	0.385595	0.541641	1.15	2.35	3.05	3.95
0.373549	0.531909	0.772255	1.5	2.6	3.25	4.15
0.356209	0.446606	0.644548	1.5	2.45	2.95	3.55
0.265027	0.298985	0.422943	1.2	2.15	2.55	3.25
0.24312	0.30943	0.499807	1.15	2.35	2.85	3.55
0.283963	0.319868	0.573293	1.3	2.55	3.25	3.95
0.329226	0.324142	0.564627	1.5	2.8	3.6	4.3
0.345801	0.375821	0.641959	1.6	2.9	3.8	4.6
0.367528	0.408556	0.743302	1.75	3.15	4.2	5.2
0.453428	0.5472	0.968443	2.1	3.65	4.9	5.85
0.491343	0.628699	1.09727	2.35	3.8	4.95	5.8
0.48269	0.627242	1.06673	2.25	3.75	4.85	5.6
0.460982	0.605281	1.05186	2	3.6	5	5.9
0.502063	0.602663	1.0695	2.1	3.6	5	6.1
0.596054	0.724525	1.21386	2.4	3.8	4.9	5.85
0.51375	0.614133	1.0048	2.15	3.55	4.55	5.5
0.347157	0.345404	0.549259	1.5	2.65	3.45	4.3
0.326679	0.28829	0.397985	1.1	2.2	2.75	3.6
0.389801	0.412288	0.62318	1.45	2.9	3.7	4.65
0.412804	0.508017	0.961016	2	3.55	4.2	5
0.376134	0.435405	0.91742	1.8	3.15	3.6	4.6
0.326059	0.306066	0.591879	1.4	2.7	3.35	4.4
0.393003	0.39373	0.691295	1.7	2.9	3.7	4.8
0.514277	0.498954	0.796931	2.05	3.05	3.85	5.15
0.50124	0.442442	0.659447	1.9	3.05	3.75	5
0.412755	0.422928	0.747229	1.9	3.1	3.95	5
0.411162	0.537659	0.912064	1.95	3	4.05	5.05
0.427334	0.564594	0.943449	1.9	3.1	4.05	4.9
0.418997	0.483156	0.820361	1.75	3.2	4	4.35
0.373642	0.439555	0.731833	1.6	2.95	3.4	3.85
0.265775	0.289043	0.514839	1.25	2.4	2.6	3.25
0.192479	0.206418	0.365522	0.95	1.95	2.3	2.85
0.233992	0.284806	0.469686	1.2	2.15	2.6	3.45
0.284483	0.298455	0.558508	1.45	2.7	3.5	4.25
0.314906	0.328753	0.744577	1.75	3.15	4	4.5
0.353927	0.351111	0.750542	1.85	3.05	3.65	4.25
0.39677	0.409985	0.71128	1.75	3	3.55	4.1
0.423181	0.510735	0.860136	1.8	3.05	3.8	4.6
0.385017	0.468094	0.897967	1.75	3.05	4	4.7
0.392995	0.472239	0.858624	1.75	3.1	3.6	4.3
0.393624	0.450685	0.706559	1.65	2.9	3.4	4.35
0.431684	0.441715	0.623381	1.65	3.05	3.75	4.75
0.627689	0.534036	0.623844	1.85	3.1	3.5	4.7
0.549225	0.433736	0.58927	1.75	2.9	3.45	4.7
0.389018	0.341296	0.637976	1.8	3.2	3.9	4.75
0.430378	0.446792	0.795101	2.1	3.35	3.95	4.55
0.407617	0.47344	0.762952	1.9	3.1	3.7	4.55
0.379502	0.455137	0.722359	1.7	3.1	3.65	4.4
0.341627	0.44375	0.795268	1.65	2.9	3.65	4.4
0.34105	0.452161	0.801407	1.6	2.7	3.5	4.15
0.348469	0.410096	0.727018	1.55	2.45	2.95	3.65
0.303907	0.326881	0.572962	1.3	2.15	2.55	3.6
0.280542	0.342276	0.531268	1.15	2	2.6	3.4
0.302075	0.33101	0.488559	1.15	1.9	2.45	2.9
0.289377	0.30063	0.47274	1.2	2.05	2.35	2.9
0.303597	0.342508	0.571556	1.3	2.2	2.5	2.8
0.689264	0.760032	0.901349	1.45	2.25	2.7	2.95
0.797721	0.936431	0.930286	1.35	2.1	2.65	3.35
0.508505	0.682148	0.703478	1.2	2.05	2.5	3.6
0.39535	0.731677	0.953811	1.5	2.8	3.25	4.35
0.553425	0.978912	1.32407	1.9	3.45	3.9	4.75
0.692487	0.947471	1.24257	1.7	3	3.35	4.1
0.5546	0.76994	1.0042	1.45	2.6	2.95	3.4
0.458868	0.733019	0.967807	1.4	2.4	2.8	3.1
0.413188	0.682501	0.877243	1.2	2.15	2.55	3.05
0.389246	0.653514	0.853059	1.15	2.05	2.45	3.25
0.361436	0.594819	0.927191	1.35	2.35	2.75	3.6
0.366784	0.63698	1.03253	1.5	2.6	3.2	3.85
0.446659	0.747904	1.27215	1.75	3.05	3.65	4.15
0.428426	0.70916	1.3573	1.9	3.4	3.95	4.75
0.439226	0.82074	1.38095	1.9	3.45	4.15	5.05
0.703665	1.20518	1.63011	2.2	3.8	4.5	5.1
0.777811	1.17522	1.55804	2.1	3.3	3.85	4.65
0.638331	0.922185	1.29052	1.75	2.9	3.4	4.4
0.630373	0.991484	1.27513	1.75	3	3.6	4.3
0.603765	0.966048	1.24403	1.65	2.7	3.25	4.1
0.608496	0.908667	1.2518	1.6	2.8	3.2	4.35
0.55262	0.916093	1.24403	1.7	3.1	3.5	4.55
0.516871	0.87849	1.17191	1.65	3.05	3.9	4.8
0.598017	0.969969	1.30834	1.75	3.25	4.05	4.85
0.665313	1.08265	1.49229	2	3.25	3.7	4.7
0.827546	1.25023	1.61715	2.15	3.2	3.8	5
0.74692	1.14285	1.48228	1.9	3.15	3.85	5
0.585713	0.924925	1.29943	1.65	2.9	3.7	4.5
0.616647	0.948185	1.39652	1.9	3.15	3.95	4.4
0.650943	0.966331	1.35689	1.9	3	3.75	4.45
0.654162	1.00245	1.32943	1.75	2.85	3.5	4.6
0.594972	0.948248	1.36085	1.85	3.05	3.75	5.05
0.612247	1.01151	1.47348	2.05	3.3	4.15	5.15
0.673107	1.05921	1.45074	2.05	3.3	4.05	4.7
0.590538	0.879864	1.13664	1.7	2.8	3.55	4.2
0.548462	0.89948	1.12107	1.65	2.55	3.1	3.75
0.571098	0.92118	1.14392	1.65	2.3	2.65	3.5
0.490268	0.694936	0.944555	1.35	2.2	2.55	3.4
0.445658	0.604495	0.855893	1.25	2.35	2.85	3.75
0.516248	0.789075	1.10644	1.6	2.9	3.35	4.2
0.65363	1.06111	1.47218	2	3.45	3.75	4.35
0.636662	1.05478	1.41302	1.9	3.2	3.8	4.25
0.54423	0.883287	1.22722	1.75	2.8	3.35	3.65
0.469676	0.765926	1.0856	1.5	2.3	2.75	3.3
0.392155	0.703829	0.943725	1.25	2.1	2.7	3.4
0.395266	0.70176	0.892568	1.2	2.15	2.65	3.2
0.356457	0.566353	0.71446	1	1.8	2.1	2.8
0.325179	0.494595	0.677943	0.95	1.9	2.15	2.9
0.425694	0.655035	0.911492	1.2	2.35	2.75	3.35
0.508102	0.826447	1.15903	1.55	2.7	3.3	3.9
0.523818	0.905548	1.26514	1.7	3.05	3.35	4
0.485224	0.813234	1.13073	1.5	2.9	3.1	3.9
0.414967	0.67992	0.897965	1.25	2.45	2.95	3.65
0.407604	0.621831	0.805556	1.2	2.3	2.95	3.3
0.35524	0.566548	0.793183	1.1	2.1	2.75	3.2
0.300471	0.502848	0.67837	0.9	1.7	2.2	2.8
0.264617	0.421625	0.586038	0.8	1.7	2.1	2.85
0.281887	0.459471	0.694117	0.95	2.25	2.55	3.45
0.331228	0.629102	0.889603	1.2	2.35	2.75	3.45
0.349545	0.717663	1.03137	1.4	2.25	2.75	3.3
0.318381	0.636975	0.966465	1.35	2.3	2.85	3.25
0.284228	0.613754	0.903772	1.25	2.2	2.85	3.25
0.337915	0.691884	0.981152	1.3	2.25	2.85	3.4
0.380607	0.655742	0.966947	1.25	2.4	3	3.5
0.362845	0.598121	0.881382	1.2	2.45	2.95	3.7
0.477249	0.772692	1.06941	1.5	2.8	3.35	4.1
0.624178	0.999338	1.3378	1.8	3	3.8	4.6
0.581175	0.954457	1.31501	1.75	3	3.5	4.35
0.448313	0.692756	1.00988	1.45	2.7	3	3.95
0.376377	0.547143	0.795623	1.15	2.25	2.7	3.9
0.41039	0.635467	0.903347	1.2	2.4	2.95	4
0.513913	0.766202	1.00654	1.3	2.45	3.2	4.1
0.589511	0.877302	1.09726	1.4	2.5	3.1	3.9
0.521044	0.816447	1.04127	1.35	2.45	2.95	3.8
0.387323	0.633486	0.855466	1.15	2.3	2.95	3.8
0.333502	0.586867	0.822925	1.1	2.2	2.8	3.75
0.34257	0.614411	0.893423	1.2	2.45	2.8	3.95
0.321015	0.601914	0.980905	1.4	3	3.45	4.7
0.389087	0.684807	1.10867	1.55	3.15	4.05	5.1
0.479907	0.864429	1.24703	1.65	3	3.85	4.85
0.505834	0.908584	1.32676	1.75	2.95	3.75	4.9
0.419752	0.75766	1.16273	1.55	2.75	3.8	5.2
0.378157	0.732364	1.07576	1.4	2.7	3.6	5.05
0.457437	0.82844	1.22434	1.55	2.9	3.55	4.5
0.466071	0.860987	1.29124	1.7	2.8	3.35	4.1
0.549133	0.989635	1.4785	2.05	3.3	3.85	4.9
0.700911	1.19499	1.72366	2.4	3.9	4.5	5.35
0.64143	1.14804	1.60945	2.15	3.4	4	4.55
0.497453	0.924447	1.34199	1.75	3	3.6	4.3
0.484792	0.833052	1.27258	1.8	3.25	3.8	4.6
0.490001	0.786992	1.20885	1.75	3.1	3.7	4.15
0.576571	0.826847	1.20281	1.65	3.25	3.85	4.25
0.631108	0.908762	1.29949	1.85	3.45	3.8	4.8
0.478403	0.762801	1.09365	1.55	2.8	3.1	4.1
0.453475	0.695784	0.960294	1.3	2.6	3.1	3.75
0.574811	0.904602	1.25802	1.7	3.2	3.8	4.5
0.681381	1.11992	1.45842	1.9	3.25	4.1	4.9
0.688903	1.08942	1.36346	1.85	3.15	4.05	4.8
0.646957	0.970655	1.3795	1.9	3.5	4.15	5.2
0.604688	0.879218	1.24709	1.75	3.15	3.8	5.25
0.572785	0.890974	1.16069	1.65	2.65	3.25	4.6
0.571004	0.949497	1.30829	1.8	2.75	3.15	4.2
0.530103	0.871718	1.22435	1.7	2.7	3.25	4.15
0.397649	0.692284	1.01865	1.4	2.35	2.9	3.6
0.263253	0.495621	0.794326	1.05	2.1	2.45	3.05
0.37448	0.57299	0.855292	1.2	2.5	2.9	3.55
0.644015	0.89739	1.23903	1.85	3.3	3.7	4.45
0.687016	0.996474	1.36138	1.95	3.55	4.3	5.2
0.598708	0.952762	1.35862	1.9	3.55	4.65	5.55
0.551795	0.938552	1.38394	1.9	3.15	3.95	4.9
0.530875	0.839305	1.23236	1.65	2.65	3.35	4.55
0.478833	0.75883	1.06454	1.45	2.7	3.45	4.6
0.473521	0.781841	1.04638	1.4	2.8	3.4	4.7
0.523195	0.830353	1.1553	1.6	3.05	3.65	5.15
0.638291	1.03958	1.42955	2	3.75	4.45	5.45
0.880788	1.40139	1.92515	2.55	4.1	4.95	5.75
0.839075	1.44694	2.06747	2.6	3.85	5.05	6.05
0.81719	1.32211	1.90958	2.5	3.95	5.15	6.05
0.858299	1.22455	1.77438	2.4	4	5.05	6
0.728068	1.1039	1.65736	2.2	3.7	4.45	5.5
0.620515	0.915286	1.37858	1.9	3.2	3.9	4.8
0.608974	0.921385	1.25693	1.75	2.9	3.9	4.9
0.671064	1.11574	1.49144	2	3.35	4.15	5.25
0.733806	1.22538	1.6782	2.35	4	4.6	5.55
0.707572	1.09184	1.54213	2.25	3.9	4.65	5.5
0.674417	0.944367	1.35751	1.85	3.6	4.5	5.3
0.781222	1.09796	1.4797	1.9	3.55	4.4	5.25
0.727812	1.00664	1.32825	1.85	3.45	4.35	5.65
0.71763	0.967707	1.32155	1.95	3.7	4.65	5.85
0.779409	1.09016	1.50271	2.1	3.45	4.25	5.5
0.725449	1.0846	1.48614	2.1	3.1	3.8	5
0.627454	0.987581	1.34826	1.9	3.15	3.8	4.7
0.593197	0.987237	1.3269	1.8	3.05	3.8	4.8
0.798648	1.22354	1.61251	2.25	3.4	4.25	5.2
0.827541	1.16212	1.60732	2.25	3.3	4.1	4.95
0.711685	1.11226	1.52907	1.95	2.95	3.7	4.95
0.677206	1.14211	1.57256	2	3.4	4.1	5.3
0.756069	1.18866	1.62264	2.3	3.9	4.5	5.25
0.811005	1.18694	1.68387	2.5	4.05	4.95	6.25
0.871486	1.20202	1.75676	2.6	4.1	5.3	6.75
0.784766	1.15159	1.6141	2.3	3.65	4.75	5.95
0.684794	1.11033	1.65982	2.2	3.6	4.65	5.45
0.850188	1.2507	1.80226	2.4	3.95	5	5.15
0.763382	1.14555	1.51521	2	3.45	4.45	4.65
0.71266	1.08871	1.43691	2	3.55	4.35	5.1
0.714956	1.02717	1.40252	2.1	3.85	4.5	5.45
0.669681	1.00279	1.42659	2.05	3.55	4.25	5.15
0.639202	0.949164	1.3661	1.95	3.35	4.25	5.2
0.556456	0.877829	1.23988	1.75	3.3	4.25	5.6
0.646709	0.996415	1.43844	2	3.6	4.55	5.75
0.690541	1.07508	1.49251	2.1	3.8	4.6	5.6
0.643645	1.06489	1.42597	1.95	3.45	4.35	5.65
0.653726	1.01388	1.44662	1.95	3.15	4.25	5.2
0.590321	0.938568	1.36183	1.8	2.95	3.85	4.8
0.634141	1.03604	1.45777	1.95	3.35	4.2	5.7
0.916334	1.30634	1.88863	2.65	4.4	5.25	6.65
0.972866	1.37939	2.00521	2.85	4.85	5.6	6.45
0.83826	1.31806	1.91992	2.6	4.15	5.05	5.9
0.774704	1.25573	1.79083	2.4	3.7	4.85	5.9
0.697586	1.1117	1.60334	2.25	3.75	4.9	6.1
0.559821	0.889948	1.41018	1.95	3.3	4.35	5.9
0.533958	0.846977	1.21439	1.75	2.95	4.1	5.65
0.561596	0.923066	1.22764	1.75	3.05	4.1	5.15
0.48827	0.868188	1.33348	1.8	3.3	4.15	5.1
0.461012	0.853465	1.34911	1.8	3.05	4	5.3
0.492392	0.883499	1.28244	1.8	2.9	3.9	5.1
0.554453	0.875319	1.1863	1.7	2.9	3.85	4.55
0.623205	0.915846	1.13691	1.55	2.8	3.65	4.2
0.612818	0.941789	1.22015	1.7	3.2	3.9	4.85
0.562929	0.898094	1.27143	1.75	3.2	3.65	5
0.513114	0.815924	1.21343	1.7	2.85	3.4	4.9
0.625514	0.991447	1.41258	1.95	3.05	4.05	5.5
0.679985	1.06659	1.48543	2.05	3.3	4.2	5.05
0.624154	0.910026	1.27825	1.85	3.2	4.1	4.85
0.665683	0.955968	1.32521	1.9	3.3	4.4	5.55
0.759694	1.11716	1.50648	2.05	3.65	4.5	5.55
0.770411	1.15096	1.56978	2.1	3.75	4.3	5.35
0.667913	1.09329	1.5363	2.15	3.5	3.9	4.85
0.652035	1.09049	1.42617	2.05	3.4	4.15	5.15
0.667519	1.01285	1.28557	1.95	3.6	4.75	5.8
0.681564	1.02375	1.48995	2.2	3.8	5.05	5.7
0.613557	1.04435	1.55031	2.2	3.85	4.8	5.3
0.520344	0.952198	1.37664	2	3.5	4.05	4.45
0.509502	0.929451	1.30153	1.8	2.8	3.2	3.6
0.392272	0.709498	0.977351	1.3	2.15	2.55	3.05
0.297565	0.543994	0.79339	1.05	2.1	2.7	3.1
0.35655	0.674103	0.924705	1.2	2.35	2.85	3.4
0.380031	0.749842	0.992858	1.3	2.1	2.55	3.45
0.432449	0.78861	1.07753	1.5	2.45	2.9	3.45
0.445289	0.749683	1.10009	1.6	2.9	3.25	3.4
0.400474	0.714618	1.03982	1.4	2.65	3.1	3.8
0.412507	0.719776	1.03504	1.35	2.75	3.25	4.15
0.474173	0.748427	1.05283	1.4	2.9	3.3	4.1
0.437816	0.738881	1.11952	1.5	2.9	3.4	4.25
0.393607	0.737929	1.21151	1.7	3	3.45	4.3
0.511216	0.868286	1.29764	1.8	3.05	3.3	4
0.590256	0.99742	1.37175	1.8	2.9	3.35	3.8
0.580085	0.98304	1.30399	1.65	2.9	3.45	4.15
0.628982	1.0048	1.44953	1.85	3.3	3.8	4.65
0.630051	1.03412	1.58083	2.1	3.5	3.9	4.3
0.58428	0.962654	1.35166	1.8	3.05	3.5	3.85
0.595042	0.961616	1.25002	1.65	2.75	3.25	4.05
0.488877	0.827358	1.1601	1.55	2.7	3.2	4.2
0.369238	0.727052	1.0761	1.4	2.65	3.5	4.35
0.544872	0.939473	1.3109	1.65	2.85	3.65	4.25
0.617736	0.924005	1.29348	1.65	2.75	3.35	3.9
0.44256	0.687162	0.986014	1.3	2.4	2.9	3.65
0.483152	0.812041	1.14486	1.55	2.65	3.05	4.05
0.536294	0.921544	1.33037	1.9	3.1	3.7	4.8
0.413831	0.722529	1.09865	1.6	2.9	3.65	4.85
0.505171	0.870174	1.29997	1.85	3.35	4.1	5.3
0.778052	1.24213	1.74951	2.35	4	4.85	5.85
0.855201	1.35917	1.91091	2.55	4.1	5.05	5.8
0.850886	1.48322	2.00728	2.7	4.25	5.2	6
0.774409	1.37307	1.86533	2.45	4	5.1	6.1
0.641219	1.07188	1.60381	2.2	3.5	4.75	5.75
0.661078	1.08698	1.6074	2.25	3.65	4.6	5.5
0.588107	0.995818	1.54764	2.25	3.8	4.6	5.25
0.557036	0.853035	1.38232	2.1	3.4	4.15	4.95
0.717595	1.09162	1.54685	2.15	3.45	4	5
0.723005	1.1653	1.64582	2.3	3.9	4.55	5.3
0.697822	1.09641	1.59825	2.35	3.9	4.65	5.4
0.692739	1.06268	1.51976	2.1	3.35	4.15	5.15
0.559418	0.868414	1.30692	1.75	3.1	3.9	4.8
0.497435	0.83409	1.26884	1.7	3.15	4.05	5
0.542753	0.958483	1.38281	1.8	3.2	3.9	4.9
0.556243	0.883737	1.33196	1.8	3.05	3.75	4.75
0.568181	0.897226	1.33113	1.8	2.95	3.9	4.95
0.650134	1.11013	1.58253	2.05	3.15	4.1	4.7
0.657351	1.0337	1.56069	2.05	2.75	3.65	4.45
0.587149	0.81008	1.23397	1.65	2.45	3.2	4.3
0.608583	0.811883	1.23145	1.75	3.15	3.95	4.8
0.661683	1.05796	1.50082	2.1	3.8	4.85	5.85
0.685226	1.18798	1.63649	2.15	3.7	4.9	6.2
0.746275	1.14977	1.55925	2.1	3.7	4.65	5.85
0.717595	1.05959	1.38575	1.95	3.65	4.35	5.25
0.50001	0.836461	1.14337	1.55	3	3.65	4.3
0.493184	0.844102	1.23718	1.65	3.15	3.8	4.5
0.614153	0.961229	1.37383	1.9	3.4	4.05	4.7
0.509552	0.843647	1.26858	1.75	3.2	3.75	4.2
0.429737	0.740577	1.18793	1.6	2.75	3.2	4.05
0.471665	0.80303	1.1575	1.5	2.5	3.2	4.05
0.457177	0.792546	1.07139	1.35	2.6	3.6	4.35
0.450147	0.691364	0.971613	1.3	2.45	3.35	4.45
0.559418	0.823621	1.17965	1.6	2.7	3.35	4.35
0.666114	1.03027	1.50427	2	3.45	4.1	5.05
0.975126	1.21366	1.60462	2.05	3.8	4.5	5.1
1.23521	1.60375	1.75976	1.85	3.35	3.9	4.45
1.76937	1.89027	1.8322	1.4	2.75	3.3	4.15
0.864555	0.92937	1.07597	1.25	2.4	3.1	4
0.964693	1.04138	1.24546	1.5	2.75	3.4	4.25
1.1604	1.2395	1.52657	1.9	3.2	4.15	5.25
1.31831	1.38282	1.71517	2.15	3.5	4.6	5.5
1.52499	1.56785	1.86953	2.25	3.7	4.35	5.15
1.68657	1.76165	2.07705	2.5	3.8	4.4	5.45
1.88458	1.94765	2.35504	2.85	4.25	5	5.75
1.69728	1.77236	2.14989	2.5	3.9	4.55	5.05
1.58999	1.7559	1.99203	2.25	3.5	4.2	4.95
1.93422	2.05536	2.32058	2.7	3.9	4.65	5.3
1.77234	1.86779	2.18197	2.6	3.55	4.25	4.85
1.3076	1.38754	1.63501	1.95	2.65	3.4	4.3
1.03799	1.10706	1.29313	1.6	2.3	3.15	4.15
1.28718	1.4203	1.60858	2	3.05	3.8	4.7
1.77197	1.80962	2.16704	2.55	3.65	4.05	4.8
1.60504	1.61542	1.94388	2.3	3.25	3.65	4.5
1.18895	1.28362	1.49872	1.8	2.75	3.45	4.55
1.23058	1.31146	1.62879	1.95	2.85	3.5	4.75
1.51548	1.56991	1.95546	2.35	3.25	3.9	5.25
1.77858	1.8622	2.21184	2.55	3.55	4.4	5.65
1.84133	1.9489	2.25204	2.55	3.8	4.65	5.65
1.62196	1.66676	1.94885	2.25	3.55	4.3	5
1.3352	1.37935	1.623	1.95	3	3.6	4.4
1.15617	1.21069	1.46005	1.8	2.55	3.15	3.95
1.09368	1.12328	1.35152	1.65	2.4	3.1	3.5
1.03179	1.06679	1.27411	1.5	2.3	2.9	3.3
1.0111	1.07322	1.28391	1.5	2.4	3	3.8
1.0411	1.11937	1.32401	1.6	2.6	3.2	4.2
1.29837	1.39734	1.68547	2.05	3.05	3.7	4.65
1.45455	1.56474	1.8804	2.3	3.5	4.45	5.4
1.54423	1.65436	1.95461	2.35	3.6	4.4	5.65
1.68167	1.8013	2.10387	2.5	3.85	4.6	6.15
1.79846	1.90893	2.2507	2.65	4.2	5.1	5.9
1.8351	1.91257	2.30436	2.75	4	4.85	5.45
1.62362	1.67786	2.04804	2.5	3.45	4.25	5.45
1.68727	1.80847	2.15426	2.55	3.5	4.3	5.7
1.90627	2.04471	2.41562	2.8	3.75	4.8	6.1
1.90635	2.03448	2.4076	2.8	3.9	4.9	5.75
1.74061	1.8506	2.21308	2.6	3.75	4.5	5.1
1.51853	1.5953	1.91551	2.25	3.2	3.6	4.45
1.39311	1.47837	1.71842	2	3	3.5	4.45
1.45753	1.61491	1.87314	2.25	3.4	3.95	4.8
1.38757	1.5466	1.82972	2.2	3.15	3.5	4.65
1.447	1.59387	1.89899	2.2	3.25	3.7	4.85
1.6578	1.83274	2.12301	2.45	3.6	4.05	4.8
1.51844	1.64158	1.91996	2.25	3.45	4	4.5
1.53739	1.59978	1.94739	2.3	3.5	3.95	4.55
1.53951	1.6164	1.88577	2.15	3.05	3.4	4.15
1.43393	1.5742	1.73629	2	3.1	3.9	4.7
1.58763	1.69637	2.00899	2.35	3.65	4.6	5.45
1.74278	1.82773	2.20984	2.6	3.7	4.4	5.35
1.73494	1.83267	2.16305	2.55	3.55	4.3	5.15
1.69803	1.77115	2.07195	2.4	3.2	3.8	4.6
1.37003	1.44372	1.65791	1.95	2.9	3.35	4.55
1.38552	1.44379	1.71545	2	3.15	3.55	4.7
1.5161	1.54104	1.89078	2.2	3.35	3.8	4.65
1.50765	1.60862	1.95836	2.35	3.55	4.25	5.1
1.68462	1.79338	2.10061	2.5	3.65	4.35	5.25
1.635	1.71586	2.00094	2.3	3.4	4	4.95
1.62398	1.76913	2.11202	2.45	3.25	3.85	4.8
1.42489	1.56973	1.86341	2.25	3.2	4	4.55
1.24247	1.39888	1.57316	1.95	3.1	3.95	4.5
1.45324	1.58466	1.80454	2.15	2.95	3.8	4.65
1.65028	1.73426	2.02046	2.35	3.2	3.9	4.95
1.68201	1.82313	2.0447	2.4	3.4	4.05	5.1
1.65061	1.74663	2.01118	2.35	3.4	4.25	4.95
1.66133	1.70775	2.06091	2.4	3.55	4.2	4.8
1.43895	1.5517	1.88799	2.2	3.35	3.95	4.5
1.1477	1.26214	1.55621	1.85	2.95	3.55	4.4
1.29714	1.39532	1.67607	2.05	2.95	3.6	4.65
1.23456	1.35468	1.57956	1.95	3	3.7	4.95
1.33563	1.42741	1.67071	2	3.3	3.85	5.1
1.43683	1.48328	1.73276	2.05	3.3	3.8	4.75
1.24917	1.30486	1.49216	1.85	2.95	3.6	4.6
1.14181	1.20271	1.41313	1.7	2.65	3.2	4.55
1.29701	1.39325	1.63176	1.95	3.3	4.05	5.25
1.27429	1.38966	1.69035	2.05	3.3	4.25	5.25
1.19735	1.28428	1.55529	1.9	2.9	3.75	4.35
1.30914	1.36764	1.62945	1.9	2.8	3.5	4.45
1.53248	1.6038	1.96586	2.25	3.25	4	5.35
1.53211	1.59205	2.01439	2.35	3.6	4.5	5.9
1.44823	1.50468	1.8608	2.3	3.55	4.45	5.5
1.41242	1.46492	1.82896	2.3	3.4	4.3	5.1
1.55127	1.61512	2.0099	2.4	3.6	4.4	5.55
1.74569	1.82274	2.24379	2.6	3.9	4.65	5.75
1.62504	1.73843	2.1557	2.55	3.65	4.5	5.35
1.61132	1.69061	2.05882	2.5	3.5	4.25	5.25
1.71388	1.74619	2.13759	2.55	3.65	4.3	5.15
1.605	1.69735	2.06025	2.45	3.65	4.4	5.3
1.75449	1.94636	2.35977	2.8	3.95	4.9	6.1
1.84959	2.0722	2.54693	3	4.2	5.25	6.3
1.69758	1.87079	2.31708	2.75	4.35	5.35	6.4
1.6969	1.86548	2.27739	2.7	3.95	4.8	5.95
1.68236	1.7964	2.17177	2.6	3.3	4.45	5.8
1.82552	1.91118	2.24621	2.65	3.8	5.05	6.35
1.90372	2.03999	2.34703	2.75	4.2	5.2	6.15
1.76121	1.85287	2.17669	2.6	4	5.05	5.9
1.84313	1.863	2.27461	2.7	4.1	4.85	5.65
1.7959	1.83432	2.26223	2.65	3.85	4.3	5.2
1.35633	1.40383	1.72914	2.05	3.05	3.7	4.6
1.16549	1.23004	1.55785	1.9	3.1	3.85	4.8
1.44418	1.5107	1.89137	2.3	3.55	4.3	5.55
1.56848	1.61493	1.97347	2.4	3.5	4.45	5.8
1.44418	1.49932	1.81458	2.2	3.35	4.25	5.4
1.32214	1.46263	1.73249	2.1	3.4	4.2	5.05
1.45382	1.66054	1.90173	2.35	3.45	4.35	5.05
1.60572	1.7717	2.06771	2.55	3.45	4.1	5.05
1.64841	1.79122	2.14225	2.55	3.65	4.35	5.4
1.75438	1.88528	2.25989	2.65	3.95	4.55	5.2
1.64927	1.7833	2.11823	2.45	3.65	4.35	5.3
1.60481	1.74842	2.08365	2.4	3.6	4.35	5.5
1.60085	1.70728	2.14441	2.55	3.75	4.25	5.3
1.39315	1.5282	1.8999	2.3	3.35	4.1	4.95
1.36687	1.54427	1.82497	2.15	3.2	4.1	4.9
1.44957	1.61479	1.88504	2.2	3.35	4.15	5.1
1.74039	1.84931	2.2305	2.65	3.95	4.55	5.6
2.15918	2.24384	2.74678	3.25	4.55	5.2	6.4
1.96767	2.10379	2.52607	3.05	4.35	5.1	6
1.53675	1.64632	1.95532	2.4	3.55	4.35	5.05
1.26108	1.30729	1.58675	1.9	3.05	4.15	5.4
1.46342	1.60063	1.9057	2.3	3.6	4.5	5.2
1.48325	1.65133	1.97172	2.35	3.6	4.45	5.35
1.75856	1.87216	2.22278	2.6	3.95	4.9	5.55
1.8604	1.95059	2.3169	2.75	4.15	5.3	5.6
1.64675	1.78462	2.16262	2.55	3.7	4.65	5.25
1.49968	1.58009	1.97695	2.3	3.3	3.95	4.95
1.42324	1.53491	1.95698	2.3	3.4	4	5
1.64596	1.83165	2.22776	2.6	3.8	4.3	4.95
1.63991	1.74842	2.08267	2.4	3.3	4	5
1.6415	1.70535	2.07653	2.4	3.3	4.15	5.35
1.53461	1.60444	1.98303	2.35	3.55	4.3	5.4
1.46889	1.58277	1.90136	2.3	3.45	4.05	5.15
1.37941	1.50998	1.78816	2.2	3.3	3.75	4.75
1.12468	1.24112	1.45473	1.8	2.9	3.45	4.4
1.17487	1.29089	1.49015	1.75	2.75	3.35	4.1
1.27734	1.36858	1.59512	1.85	2.75	3.25	3.95
1.33238	1.42817	1.64404	1.9	3	3.6	4.6
1.32477	1.43196	1.6834	1.95	3.2	4.1	5.15
1.50231	1.66392	1.9482	2.3	3.25	4.3	5.25
1.62658	1.79325	2.09379	2.5	3.5	4.35	5.3
1.55299	1.68183	1.98613	2.4	3.7	4.35	5.1
1.66346	1.75265	2.15307	2.55	3.95	4.5	5.5
2.07856	2.13112	2.60331	3.05	4.45	5.25	6.1
1.92073	1.99703	2.38542	2.8	4.1	5.1	5.65
1.55401	1.6408	1.97958	2.3	3.7	4.5	5.3
1.7755	1.87852	2.23545	2.55	4	4.65	5.65
1.84891	1.97695	2.37264	2.75	4.1	4.9	6.1
1.58569	1.81526	2.09784	2.5	3.75	4.9	6.3
1.55822	1.75525	2.01241	2.4	3.75	4.85	6.25
1.70293	1.72277	2.12717	2.5	3.85	4.75	5.45
1.37398	1.38113	1.72524	2	3.05	3.9	4.3
1.17369	1.30804	1.5725	1.85	3	3.75	4.55
1.39857	1.59675	1.95565	2.35	3.75	4.25	5.45
1.49311	1.60346	1.9948	2.45	3.9	4.35	5.45
1.47039	1.51974	1.84492	2.25	3.5	4.15	4.95
1.33373	1.38603	1.65053	2	3.1	3.85	4.7
1.31736	1.35799	1.61166	1.95	3.25	4.2	4.95
1.37613	1.44983	1.71635	2	3.2	3.9	4.7
1.37164	1.44231	1.7249	2	3.15	3.65	4.5
1.36774	1.37388	1.67911	2	3.1	3.5	4.5
1.26817	1.28939	1.56045	1.9	2.85	3.35	4.65
1.34687	1.43492	1.6968	2.1	3.1	3.8	4.9
1.32598	1.42085	1.68806	2.05	2.9	3.4	4.3
1.02705	1.0828	1.31035	1.55	2.35	2.95	3.9
1.04445	1.11032	1.39033	1.65	2.65	3.25	4.5
1.30665	1.39504	1.72231	2.05	3.2	3.65	5.05
1.47424	1.54133	1.8437	2.25	3.6	4.35	5.6
1.5536	1.61243	1.98777	2.45	3.75	4.65	5.95
1.76805	1.88607	2.31299	2.8	4.1	4.8	5.95
1.8205	2.02254	2.42917	2.95	4.45	5.3	6.4
1.59611	1.74199	2.16806	2.7	4.2	5.35	6.45
1.62016	1.77406	2.19273	2.7	4	5.2	6.1
1.80503	2.09936	2.46987	2.95	4	4.85	5.75
1.63338	1.85144	2.19543	2.6	3.9	4.9	6.15
1.65199	1.73442	2.12563	2.5	4.05	5.1	6.45
1.76674	1.84869	2.2195	2.65	4.3	5.2	6.1
1.44887	1.54753	1.84834	2.2	3.75	4.8	5.95
1.2733	1.39978	1.70569	2.05	3.5	4.5	5.95
1.31304	1.46225	1.76	2.15	3.5	4.55	5.55
1.30143	1.43433	1.73118	2.05	3.15	4.3	5.2
1.30846	1.39919	1.73054	2.05	3.05	4.1	5.1
1.51014	1.58001	1.93691	2.3	3.4	4.1	4.95
1.6623	1.76282	2.09102	2.45	3.75	4.3	5
1.51334	1.61273	1.93509	2.2	3.35	4.1	4.75
1.38889	1.4433	1.76529	2.05	2.95	3.65	4.35
1.42775	1.4709	1.73838	2.1	3.05	3.4	3.95
1.45461	1.54787	1.81264	2.2	3.35	3.5	4.05
1.33794	1.41539	1.78808	2.2	3.15	3.45	4.55
1.19249	1.30742	1.64165	2.05	2.95	3.5	4.75
1.18768	1.38963	1.57462	1.95	3.05	3.85	4.85
1.5683	1.73455	1.95314	2.35	3.65	4.65	5.3
1.82114	1.92461	2.2649	2.75	4.1	4.85	5.4
1.54809	1.62733	1.97301	2.4	3.6	4.05	4.95
1.28499	1.36869	1.65275	2	3.2	3.5	4.25
1.20005	1.31154	1.58121	1.95	3	3.55	4.55
1.47366	1.62979	1.97112	2.4	3.4	4.35	5.4
1.60872	1.73418	2.15269	2.6	3.8	4.55	5.2
1.49997	1.63035	1.98581	2.45	3.75	4.35	5.15
1.46129	1.6713	2.00531	2.55	3.7	4.4	5.25
1.46807	1.62346	2.01558	2.55	3.85	4.5	5.05
1.58656	1.66708	2.04314	2.5	3.95	4.45	5.1
1.46665	1.61858	1.9586	2.35	3.4	4.05	4.9
1.15649	1.30156	1.61105	2	3.05	3.95	4.65
1.37737	1.54023	1.85542	2.35	3.7	4.55	5.45
1.77287	1.99255	2.41084	2.95	4.5	5.2	5.95
1.78213	1.92319	2.36507	2.85	4.3	4.8	5.35
1.45605	1.58118	1.92229	2.3	3.25	3.55	4.25
1.06327	1.21701	1.45872	1.8	2.6	2.8	3.8
0.877713	1.02256	1.22423	1.55	2.4	2.7	3.9
0.858227	0.998529	1.19889	1.5	2.6	2.95	3.95
1.10115	1.26431	1.52707	1.95	3.3	3.7	4.6
1.6299	1.85652	2.27313	2.85	4.05	4.45	5.45
1.63175	1.83167	2.23044	2.75	3.75	4.05	5
1.07854	1.21994	1.43144	1.75	2.7	3.1	3.95
1.20158	1.3014	1.50036	1.8	2.7	3.15	4.05
1.47207	1.54735	1.84185	2.2	3.05	3.55	4.45
1.32	1.40854	1.69239	2	3	3.6	4.7
1.47747	1.59791	1.90256	2.3	3.55	4.1	5.4
1.69205	1.82037	2.16233	2.6	3.9	4.55	5.65
1.62065	1.78016	2.11788	2.5	3.6	4.45	5.55
1.63982	1.82992	2.22034	2.65	3.8	4.8	5.55
1.61837	1.78245	2.17376	2.6	3.75	4.65	5.15
1.27895	1.43556	1.70152	2.05	3.05	3.8	4.9
1.4891	1.64616	1.89201	2.3	3.45	4	5.35
2.10084	2.23248	2.57325	3.1	4.4	5	6.15
1.95095	2.09891	2.49205	3	4.4	5.35	6.25
1.54565	1.69464	2.07359	2.55	3.85	4.6	5.3
1.43758	1.5165	1.87898	2.4	3.45	4.2	5.1
1.53495	1.63987	1.99991	2.55	3.75	4.45	5.7
1.76032	1.91155	2.29695	2.8	4	4.65	5.95
1.66698	1.79768	2.19012	2.65	3.75	4.6	5.8
1.39726	1.55247	1.84717	2.3	3.3	4.15	5.75
1.38972	1.54175	1.83655	2.2	3.3	4.2	5.8
1.53589	1.63992	1.97275	2.3	3.75	4.45	5.15
1.38892	1.50739	1.78666	2.15	3.5	4.1	4.4
1.23413	1.40779	1.64986	2.05	3.15	3.8	4.5
1.48255	1.67837	1.97424	2.45	3.55	4.3	5.3
1.73906	1.88966	2.26902	2.75	4.05	4.85	5.95
1.66206	1.75958	2.16365	2.65	4.05	5.1	6.2
1.55382	1.69099	2.0332	2.55	3.85	4.9	5.8
1.49661	1.64316	1.92905	2.4	3.4	4.05	5.05
1.33761	1.44345	1.76768	2.2	3.1	3.65	4.95
1.27509	1.4031	1.73434	2.15	3.25	3.9	5.1
1.35913	1.47863	1.8045	2.25	3.35	4.05	5.15
1.74885	1.88869	2.2387	2.75	3.85	4.35	5.45
1.96821	2.11132	2.5245	3	4.2	4.7	5.65
1.79862	1.95969	2.40347	2.85	4.1	4.75	5.75
1.52437	1.72033	2.07422	2.45	3.65	4.35	5.6
1.32291	1.44822	1.72819	2.05	3.1	3.75	5.25
1.27019	1.34686	1.66352	1.95	2.9	3.45	4.9
1.27104	1.3684	1.75748	2.05	3.05	3.55	4.55
1.31059	1.45184	1.76291	2.1	3.15	3.6	4.25
1.26188	1.40449	1.64465	1.95	2.85	3.3	3.95
1.24059	1.35821	1.65874	2	2.9	3.35	4.35
1.51213	1.6347	1.98791	2.4	3.65	4.25	5.25
1.82629	1.99171	2.35792	2.85	4.3	5.15	5.7
1.86648	2.04228	2.4002	2.9	4.25	5.2	5.6
1.71344	1.79239	2.1169	2.5	3.75	4.7	5.2
1.5783	1.65263	1.96336	2.35	3.55	4.2	4.8
1.64686	1.79727	2.10994	2.55	3.65	4.05	5
1.67763	1.81487	2.12057	2.55	3.55	4.1	5.2
1.4355	1.56416	1.8438	2.25	3.3	3.95	4.9
1.44111	1.5846	1.80361	2.2	3.35	4.05	5.15
1.47529	1.59281	1.84859	2.2	3.6	4.4	5.5
1.52526	1.66545	2.02228	2.4	3.65	4.35	5
1.34085	1.46953	1.7843	2.2	3	3.7	4.55
1.11718	1.24425	1.53374	1.9	2.8	3.35	4.55
1.30471	1.53592	1.8358	2.25	3.4	3.75	4.8
1.55142	1.75538	2.12928	2.6	3.75	4.5	5.3
1.58866	1.68134	2.16477	2.6	3.7	4.55	5.3
1.42091	1.53079	1.96566	2.4	3.5	4.3	5.1
1.46354	1.59883	1.97954	2.45	3.75	4.75	5.45
1.50044	1.64794	2.05869	2.55	3.85	4.65	5.55
1.27966	1.38729	1.8021	2.25	3.2	3.8	5
0.941797	1.06479	1.35023	1.75	2.55	3.05	4.25
0.941068	1.07292	1.3053	1.65	2.8	3.55	4.6
1.28192	1.39173	1.71041	2.15	3.45	4.25	5.3
1.29712	1.44826	1.74259	2.3	3.5	3.85	5.2
1.1367	1.24274	1.53679	2	3.15	3.55	5.05
1.05448	1.1452	1.49575	1.85	2.9	3.45	4.7
1.16681	1.28406	1.60489	1.9	3.05	3.6	4.65
1.24661	1.35019	1.63245	1.95	3.05	3.8	4.7
1.28515	1.35801	1.60075	1.95	3.1	3.85	4.8
1.23621	1.3032	1.49273	1.8	3.1	3.7	4.65
1.04547	1.16195	1.2965	1.55	2.95	3.6	4.5
0.92696	0.988547	1.06752	1.5	2.95	3.55	4.25
0.783038	0.70127	0.647208	1	2.55	2.95	3.85
0.353701	0.45261	0.618276	1.1	2.8	3.05	4
0.543703	0.534599	0.566417	1.25	2.85	3.1	3.9
0.740779	0.570292	0.441691	1.15	2.75	3.2	4
0.672206	0.52662	0.449013	1.2	2.7	3.15	4.2
0.599996	0.529158	0.497766	1.3	2.8	3.4	4.4
0.684792	0.676166	0.681374	1.55	3.4	4	4.95
0.71226	0.689628	0.716168	1.8	3.35	3.75	5.15
0.690595	0.664884	0.692364	1.9	3.3	3.95	5.35
0.838932	0.863227	0.875112	2.25	3.75	4.65	6
0.897445	0.844993	0.853533	2.5	3.95	5	6.25
0.756334	0.712015	0.782747	2.35	3.85	4.75	5.9
0.645686	0.651539	0.766849	2	3.3	3.9	5.1
0.595262	0.608892	0.689207	1.85	3	3.6	4.6
0.549938	0.605765	0.645524	1.75	2.95	3.6	4.55
0.658069	0.66739	0.703636	1.6	2.9	3.65	4.7
0.6933	0.679834	0.687621	1.55	2.75	3.6	4.8
0.676213	0.671573	0.652123	1.6	2.95	3.9	5.05
0.930126	0.889547	0.867865	1.85	3.6	4.45	5.3
0.914659	0.929272	0.890994	1.65	3.1	3.65	4.6
0.584828	0.637129	0.622947	1.15	2.3	2.8	3.85
0.477621	0.490839	0.526532	1.3	2.7	3.4	4.65
0.820101	0.810601	0.779402	2.05	3.65	4.65	5.8
0.822338	0.782816	0.981255	2.35	4.15	4.85	5.65
0.542175	0.533934	0.767671	1.9	3.7	4.25	5.25
0.569013	0.551782	0.569351	1.6	3.2	4.05	4.95
0.703318	0.54675	0.731035	1.8	3.1	3.8	4.85
0.732683	0.520043	0.800475	1.8	2.8	3.4	4.65
0.515064	0.406066	0.67662	1.6	2.9	3.65	4.7
0.4034	0.391581	0.618943	1.6	3.15	3.95	4.75
0.438375	0.458208	0.728021	1.7	3.1	3.7	4.25
0.393819	0.436413	0.772934	1.75	3.2	3.85	4.75
0.327793	0.365882	0.576353	1.55	3.25	4.1	5.05
0.405999	0.381881	0.522193	1.4	3	3.6	4.55
0.358355	0.32492	0.469798	1.2	2.55	3	4.2
0.295901	0.390258	0.4716	1.2	2.65	3.25	4.45
0.370453	0.527828	0.621224	1.55	3.35	4.15	5.25
0.314071	0.413186	0.652283	1.55	3.45	4.35	5.25
0.276423	0.377665	0.634184	1.45	3.15	3.75	4.6
0.401372	0.514373	0.649943	1.55	3.2	3.8	4.7
0.471304	0.618959	0.661967	1.8	3.65	4.3	5.2
0.460798	0.622055	0.639392	1.9	3.8	4.3	5.15
0.391068	0.498355	0.535652	1.75	3.4	4	4.7
0.314722	0.343987	0.482281	1.7	3.5	4.3	4.95
0.310814	0.309317	0.596599	1.75	3.55	4.5	5.1
0.356627	0.426024	0.690819	1.7	3	3.9	4.4
0.379136	0.499211	0.611099	1.45	2.5	3.15	3.95
0.288072	0.367772	0.462178	1.15	2.35	2.85	4.15
0.253548	0.331961	0.503798	1.35	2.85	3.35	4.5
0.352646	0.556874	0.622091	1.65	2.9	3.25	4.05
0.367307	0.567229	0.524349	1.4	2.45	2.6	3.6
0.337122	0.442053	0.422061	1.25	2.45	2.55	3.6
0.400587	0.592408	0.565149	1.35	2.45	2.65	3.7
0.458005	0.609265	0.695106	1.7	3.05	3.55	4.45
0.648834	0.531891	0.673262	2.1	3.5	4.1	5.1
0.688695	0.483107	0.628268	2	3.5	3.9	5
0.555091	0.493879	0.616703	1.85	3.55	4.05	4.85
0.536279	0.571138	0.625443	1.85	3.35	3.95	4.45
0.610172	0.556432	0.563251	1.5	2.9	3.45	4.2
0.749253	0.65081	0.594842	1.45	2.9	3.5	4.45
0.757843	0.71191	0.655345	1.65	2.95	3.5	4.1
0.524798	0.518455	0.571831	1.45	2.55	3.25	4
0.380366	0.403909	0.572984	1.3	2.4	3.2	4.15
0.423106	0.480101	0.662247	1.45	2.9	3.4	4.3
0.526102	0.500313	0.64358	1.65	3.2	3.9	4.9
0.757765	0.609863	0.649617	1.8	3.2	4.15	5.05
0.755873	0.736235	1.01443	2.15	3.7	4.45	5.45
0.541307	0.66337	1.08763	2.1	3.7	4.4	5.6
0.533265	0.582399	0.722862	1.7	3.25	4.15	5.35
0.703141	0.637403	0.727034	1.85	3.45	4.3	5.4
0.688323	0.567021	0.846133	2	3.55	4.45	5.55
0.634765	0.596055	0.843438	2	3.45	4.4	5.5
0.710281	0.74327	0.862942	1.95	3.5	4.3	5.35
0.638082	0.671569	0.821275	1.8	3.25	3.95	5.25
0.591188	0.607706	0.741865	1.8	3.1	3.8	4.95
0.603526	0.636368	0.698023	1.7	3	3.6	4.65
0.464866	0.511435	0.584935	1.5	2.8	3.3	4.45
0.488895	0.456956	0.608608	1.55	2.85	3.5	4.45
0.545931	0.601637	0.905934	1.8	3.15	3.75	4.9
0.534319	0.656311	1.01196	2.1	3.6	4.1	5.35
0.612396	0.657152	0.822543	2.3	3.75	4.35	4.95
0.555538	0.567541	0.676699	2.15	3.3	4.05	4.5
0.497663	0.533636	0.757386	1.8	3	3.6	4.25
0.547879	0.603595	0.775679	1.5	2.7	3.15	3.9
0.486108	0.543284	0.663951	1.4	2.65	3.15	3.9
0.514137	0.690998	0.896329	1.75	3.2	3.65	4.05
0.646165	0.90357	1.1899	2.15	3.45	3.9	4.35
0.578413	0.743127	0.943196	1.95	3.15	3.65	4.6
0.519672	0.549656	0.595043	1.7	3	3.65	4.4
0.551887	0.509161	0.528943	1.55	2.75	3.5	4.15
0.507887	0.566888	0.696644	1.45	2.65	3.5	4.5
0.511688	0.658468	0.816025	1.45	3	3.95	5
0.480842	0.619742	0.734904	1.45	3.1	4.2	4.85
0.336557	0.461539	0.658182	1.25	2.75	3.95	4.6
0.233296	0.293211	0.523611	0.95	2.55	3.55	4.6
0.230068	0.273861	0.478132	1.15	2.6	3.35	4.3
0.242314	0.310435	0.489865	1.5	2.85	3.4	4.1
0.21906	0.284551	0.44098	1.6	3.15	3.75	4.4
0.266949	0.334215	0.5371	2.15	3.75	4.25	5.3
0.335371	0.413019	0.657093	2.65	4.1	4.45	5.7
0.353272	0.438683	0.658357	2.35	3.55	4.05	5.2
0.300877	0.381742	0.564188	1.95	3.4	3.85	4.85
0.242394	0.310673	0.454728	1.8	3.35	3.8	4.9
0.235965	0.283667	0.398689	1.75	3.2	3.8	4.85
0.220089	0.259837	0.378691	1.65	3.15	3.55	4.4
0.190173	0.237203	0.333972	1.45	2.9	3.2	4.25
0.193664	0.242014	0.344694	1.5	2.9	3.4	4.55
0.227632	0.260709	0.416697	1.95	3.5	3.95	4.65
0.280246	0.333618	0.503806	1.95	3.45	3.7	4.1
0.282831	0.365448	0.55874	1.65	3.05	3.5	4.2
0.2884	0.375694	0.637654	1.85	3.35	4.15	4.95
0.27896	0.378043	0.625382	1.9	3.5	4.2	4.95
0.212838	0.281171	0.451054	1.5	3.35	3.95	4.7
0.215373	0.26562	0.42992	1.4	3.05	3.7	4.55
0.224271	0.277773	0.421333	1.55	2.95	3.6	4.6
0.212462	0.244308	0.410553	1.55	2.9	3.5	4.3
0.215199	0.245251	0.465514	1.5	2.6	3.05	3.7
0.254719	0.31179	0.529624	1.55	2.7	3.2	3.85
0.320965	0.395395	0.644174	1.9	3.15	3.75	4.55
0.364916	0.440963	0.67453	2.35	3.6	4.25	5.25
0.330243	0.404985	0.62264	2.25	3.45	4.15	5.1
0.253874	0.32221	0.572473	1.9	2.95	3.6	4.55
0.226116	0.278222	0.504732	1.65	2.75	3.4	4.4
0.232618	0.280097	0.507231	1.65	3	3.6	4.55
0.241283	0.293513	0.589924	1.95	3.25	3.75	4.75
0.257986	0.334879	0.645686	1.95	3.1	3.65	4.55
0.29513	0.400691	0.674062	1.8	3.1	3.65	4.2
0.305322	0.408039	0.663447	1.75	3.1	3.45	3.9
0.259439	0.351514	0.573693	1.5	2.7	2.95	3.95
0.254948	0.343031	0.556037	1.35	2.6	3.15	4
0.267252	0.338049	0.492209	1.55	2.65	3.2	3.6
0.21743	0.258419	0.375428	1.45	2.1	2.45	3.3
0.165966	0.204558	0.351339	1.1	1.75	2	3.05
0.180255	0.223591	0.389064	1.35	2.25	2.4	3.3
0.228396	0.273427	0.432722	1.6	2.55	2.8	3.45
0.225519	0.272825	0.417602	1.6	2.7	3.2	3.75
0.201622	0.249274	0.345243	1.7	3.05	3.8	4.4
0.180944	0.225279	0.312047	1.65	2.95	3.65	4.3
0.164029	0.211453	0.381975	1.5	2.7	3.25	4.1
0.170352	0.209671	0.395405	1.45	2.75	3.3	4.25
0.239785	0.260961	0.45097	1.9	3.35	3.9	4.6
0.327989	0.382844	0.605433	2.3	3.7	4.25	4.85
0.308269	0.403306	0.638555	2.05	3.35	3.95	4.7
0.216441	0.288791	0.48227	1.55	2.75	3.35	4
0.176953	0.231388	0.386905	1.3	2.45	3.05	3.7
0.188156	0.235321	0.391666	1.45	2.75	3.6	4.55
0.211848	0.257765	0.476561	1.85	3.3	4.25	5.1
0.224374	0.277135	0.515766	2.05	3.35	3.95	4.8
0.255473	0.304496	0.485684	2.15	3.5	3.95	4.9
0.296854	0.371735	0.593685	2.35	3.85	4.45	5.2
0.286302	0.362037	0.604426	2.3	3.5	4.15	5
0.296437	0.372745	0.61923	2.1	3.35	3.75	4.65
0.278583	0.356601	0.569949	1.85	3.15	3.65	4.7
0.310157	0.368836	0.527236	2.25	3.45	4.3	5.4
0.322018	0.381578	0.537249	2.35	3.75	4.4	5.55
0.226334	0.288024	0.441861	1.75	3.05	3.65	5.1
0.214314	0.270418	0.468044	1.85	3.1	3.85	4.85
0.274173	0.314542	0.51278	2.2	3.5	4.35	5
0.274866	0.301739	0.426955	2.15	3.25	4	5
0.222536	0.2634	0.362781	1.8	2.85	3.5	4.85
0.235209	0.290094	0.43185	1.85	2.9	3.55	4.6
0.235827	0.293311	0.408959	2.05	3.15	3.5	4.05
0.229212	0.292611	0.397796	1.8	2.85	3.15	3.85
0.249334	0.311247	0.500828	1.65	2.7	3.4	4.1
0.247101	0.311025	0.562465	1.75	2.95	3.75	4.4
0.223337	0.270587	0.504226	1.65	2.85	3.45	4.15
0.181679	0.216659	0.357447	1.5	2.65	3.25	3.9
0.186508	0.223978	0.35183	1.55	2.75	3.4	4.15
0.247992	0.32171	0.489371	1.6	2.9	3.55	4.6
0.283028	0.385207	0.546093	1.55	2.7	3.4	4.55
0.256577	0.348636	0.518092	1.4	2.4	3.05	3.85
0.190415	0.257685	0.3837	1.25	2.3	3	3.8
0.208981	0.275696	0.407539	1.55	2.7	3.45	4.5
0.238438	0.312106	0.527198	1.75	3	3.7	4.8
0.262976	0.337325	0.622593	1.75	3.25	4.1	4.95
0.336259	0.465443	0.767078	2.1	3.7	4.45	5.25
0.32111	0.459545	0.706015	2.2	3.65	4.25	5.1
0.352942	0.4988	0.812585	2.3	3.85	4.45	5.4
0.35068	0.480493	0.845248	2.4	4.1	4.75	5.65
0.269152	0.335356	0.582201	2.15	3.65	4.3	5.1
0.242229	0.290668	0.429942	1.95	3.3	4.1	5.45
0.29269	0.35558	0.582279	2.25	3.65	4.7	5.9
0.319876	0.390709	0.706592	2.35	3.75	4.6	5.85
0.287972	0.365626	0.632429	2	3.5	4.1	5.85
0.296964	0.384576	0.676761	2.15	3.6	4.1	5.5
0.265674	0.347261	0.657319	2.15	3.5	4.05	5.55
0.254517	0.307461	0.602354	2.15	3.85	4.45	5.8
0.270561	0.30735	0.587646	2.35	3.9	4.4	5.2
0.252151	0.306045	0.495509	2	3.25	4.1	5
0.255439	0.335767	0.520187	1.9	3.5	4.5	5.55
0.284674	0.373095	0.625484	2.15	3.75	4.65	6
0.286847	0.362978	0.642145	2.2	3.65	4.55	5.7
0.282827	0.349007	0.601616	2.15	3.45	4.25	5.05
0.290939	0.34529	0.541867	2.05	3.15	4	5.15
0.293195	0.339318	0.519508	2.15	3.5	4.45	5.45
0.259186	0.301666	0.464866	2.15	3.6	4.55	5.15
0.220512	0.272326	0.397805	1.85	3.2	3.9	4.55
0.211552	0.261624	0.334863	1.75	2.95	3.35	3.8
0.187125	0.225049	0.265366	1.5	2.35	2.65	3.3
0.192109	0.221964	0.296343	1.35	2.35	2.65	3.7
0.217969	0.244191	0.366636	1.65	3.15	3.5	4.6
0.251868	0.278046	0.390387	2.05	3.6	4.3	5.3
0.278669	0.292848	0.411807	2.3	3.5	4.3	5.05
0.253213	0.274764	0.397757	2.1	3.25	3.75	4.45
0.258144	0.281753	0.40171	2	3.3	3.7	4.55
0.248323	0.257817	0.391408	1.9	3.3	3.75	4.8
0.232778	0.249647	0.360008	1.85	3.25	3.75	4.9
0.255318	0.288682	0.37793	2.25	3.7	4.5	5.5
0.236057	0.279063	0.352276	2.25	3.75	4.85	5.95
0.219202	0.262604	0.35001	2.15	3.7	4.65	5.75
0.2406	0.283507	0.408323	2.35	3.6	4.35	5.15
0.225548	0.254945	0.370922	2.1	3.1	3.7	4.8
0.209445	0.229644	0.299646	1.8	3.05	3.8	4.85
0.2333	0.250596	0.324653	1.9	3.35	4.2	4.85
0.227667	0.254971	0.310398	1.9	3.35	3.95	4.6
0.248508	0.273092	0.28408	1.95	3.25	3.75	4.35
0.233135	0.261199	0.295195	1.95	3.3	4.05	4.55
0.176377	0.211535	0.25722	1.65	3	3.9	4.55
0.165683	0.191025	0.243219	1.4	2.65	3.3	4.2
0.170283	0.209056	0.339103	1.4	2.6	3.1	4.05
0.179244	0.221168	0.416239	1.45	2.65	3.15	3.65
0.181623	0.226381	0.37515	1.4	2.55	2.95	3.25
0.205127	0.241272	0.36198	1.55	2.5	2.7	3.35
0.186639	0.215919	0.300898	1.45	2.15	2.55	3.25
0.184177	0.221773	0.261661	1.55	2.5	3.15	4.05
0.222822	0.25223	0.302453	2	3.15	3.8	4.8
0.23147	0.269517	0.356358	2.15	3.3	4	4.7
0.248535	0.324986	0.428461	2.2	3.45	4.15	5.05
0.251393	0.322246	0.443539	2	3.3	3.9	5
0.231884	0.306253	0.453611	1.65	2.85	3.5	4.65
0.226201	0.310475	0.444766	1.6	2.9	3.65	4.8
0.252438	0.305361	0.443136	1.9	3.45	4.15	4.95
0.271723	0.332951	0.490172	2.2	3.65	4.35	5.15
0.271133	0.325803	0.508337	2.4	3.65	4.35	5.5
0.271482	0.320415	0.44687	2.3	3.4	4	5.15
0.241006	0.281643	0.348524	1.95	2.9	3.65	4.85
0.229364	0.251189	0.340029	1.9	2.9	4.05	5.15
0.252691	0.281742	0.368658	2.1	3.5	4.5	5.25
0.245465	0.28149	0.354794	2.1	3.45	4	4.8
0.232247	0.27013	0.334316	1.8	2.9	3.3	4.25
0.206628	0.250889	0.336592	1.7	2.85	3.65	4.6
0.211565	0.270134	0.384446	2	3.05	3.85	4.55
0.238845	0.296048	0.391191	2	2.8	3.25	4.05
0.217782	0.261164	0.366303	1.75	2.5	3.05	4.2
0.191626	0.220667	0.33371	1.65	2.65	3.15	3.95
0.20557	0.238558	0.363346	1.7	2.85	3.25	3.8
0.239415	0.303392	0.45837	2.05	3.2	3.35	3.8
0.21998	0.281026	0.432751	2	2.95	3.1	3.4
0.170887	0.206918	0.33691	1.35	2.3	2.75	3.15
0.147697	0.176172	0.263332	1.05	2.2	2.7	3.25
0.14734	0.176997	0.249531	1.1	2.1	2.45	3.3
0.132288	0.163003	0.242404	0.95	1.75	2.15	3
0.139219	0.170761	0.251223	1.1	2.15	2.6	3.1
0.192964	0.248543	0.392764	1.55	2.8	3.1	3.6
0.207821	0.27305	0.465128	1.65	2.8	3.25	4.15
0.205536	0.25383	0.400961	1.55	2.8	3.4	4.7
0.234179	0.29054	0.453341	1.8	3.1	3.75	4.95
0.234379	0.297835	0.474563	2	3.2	3.95	4.7
0.235213	0.287554	0.441347	1.8	2.8	3.35	4.4
0.24838	0.307632	0.470388	1.85	2.9	3.3	4.5
0.212213	0.273066	0.356879	1.65	2.8	3.3	4.15
0.160334	0.198064	0.217181	1.15	2.25	2.75	3.7
0.140197	0.153405	0.207067	1.1	2.2	2.75	3.9
0.189336	0.20586	0.276895	1.45	2.4	2.8	3.65
0.198959	0.222739	0.308025	1.5	2.25	2.55	3.3
0.18579	0.203779	0.299579	1.45	2.2	2.65	3.6
0.2081	0.238079	0.346914	1.65	2.55	2.9	3.7
0.207765	0.243034	0.341691	1.7	2.75	3.05	3.75
0.220753	0.267589	0.414769	1.75	3	3.4	4
0.229218	0.28762	0.458961	1.8	3	3.5	4.25
0.198792	0.231937	0.352531	1.55	2.6	3.15	4.1
0.176892	0.19939	0.309344	1.5	2.5	3	3.9
0.203922	0.245964	0.374731	1.75	2.65	3.1	3.85
0.205226	0.24904	0.360966	1.7	2.65	3.15	3.75
0.187398	0.228822	0.288986	1.6	2.65	3.05	3.85
0.200307	0.231505	0.314572	1.6	2.8	3.15	4
0.21651	0.240187	0.326576	1.8	3.15	3.6	4.6
0.214378	0.255302	0.326803	1.9	3.2	3.75	5
0.223482	0.292591	0.454473	1.85	3.15	3.95	5.35
0.261778	0.339347	0.604745	2.1	3.6	4.7	5.8
0.2739	0.326011	0.552001	2.25	3.75	4.8	5.25
0.266868	0.299164	0.436675	2.3	3.8	4.7	5.15
0.292844	0.313469	0.418783	2.55	4.2	4.85	5.25
0.291286	0.315163	0.433107	2.45	4	4.45	4.85
0.259459	0.295129	0.408131	2.15	3.7	4.2	4.5
0.691579	1.16168	1.82498	3	4.75	6.2	7.65
0.606442	1.04591	1.72942	2.9	4.45	5.65	6.9
0.569072	0.991937	1.55727	2.7	4.3	5.7	7.35
0.610943	0.947312	1.4926	2.7	4.5	5.85	7.4
0.691866	0.960957	1.59761	2.9	4.5	5.55	6.65
0.727884	1.06637	1.81843	3.25	4.95	6.15	7.35
0.756313	1.19533	2.10934	3.75	5.8	7.05	8.7
0.723499	1.25875	2.11111	3.55	5.6	7.05	9.45
0.781766	1.42724	2.37229	3.7	5.85	7.15	9.35
0.795268	1.23571	2.13973	3.75	5.9	6.8	8.35
0.624663	0.802793	1.44499	3	4.85	6.1	8.1
0.759841	1.01759	1.71242	3.2	5.05	6.6	8.85
0.922344	1.19743	1.94571	3.9	5.95	7.4	9.2
0.781812	1.17736	1.90678	3.7	5.5	6.9	8.5
0.809183	1.43795	2.20279	3.35	5.2	6.65	8.15
0.892537	1.54274	2.32496	3.5	5.4	7	8.55
0.806474	1.40846	2.12058	3.4	5.1	6.6	8.05
0.79669	1.37341	2.09876	3.45	5.25	6.35	7.55
0.771336	1.28169	1.84356	3.25	5	6.2	7.55
0.767201	1.14445	1.67097	3.25	5.05	6.5	7.85
0.751149	0.999651	1.70687	3.4	5	6.35	7.95
0.709914	1.09675	1.7769	3.25	5.05	6.55	8.15
0.743506	1.2786	1.94705	3.3	5.5	7.1	8.05
0.714401	1.13229	1.82266	3.4	5.5	7.05	8
0.826343	1.31222	2.11303	3.65	5.65	7.1	8.65
0.823309	1.23757	1.97747	3.45	5.35	6.9	8.65
0.770687	1.07025	1.81688	3.6	5.65	7.25	8.9
0.85803	1.25444	2.02145	3.8	5.65	7	8.85
0.852971	1.2168	2.03439	4	5.7	7.25	9.5
0.913547	1.45975	2.50513	4.55	6.55	8.25	11
0.882481	1.46915	2.43645	4.2	6.15	7.7	10.1
0.792287	1.23455	2.02441	3.6	5.65	7.3	9.45
1.0172	1.55455	2.39144	4.1	6.6	8.4	10.1
1.02255	1.58793	2.4136	4.3	6.65	8.5	10.1
0.825089	1.1948	1.90373	3.9	6.05	7.8	9.95
0.905888	1.45956	2.2969	4.35	6.9	8.85	11.05
0.911959	1.5036	2.48118	4.45	7	9.1	11.35
0.899568	1.41594	2.46237	4.45	6.9	8.55	10.15
0.839724	1.50534	2.4966	4.25	6.65	8.1	9.1
0.831694	1.42387	2.39225	4	6	7.35	9.25
0.831106	1.45574	2.46331	3.85	5.7	7.25	9.75
0.82776	1.51707	2.57748	3.95	5.95	7.55	9.35
0.80035	1.31532	2.26417	3.85	5.7	7.35	9.3
0.843859	1.34871	2.27842	4.05	6.4	8.25	10.15
0.977425	1.46258	2.55102	4.75	7.7	9.7	11.25
0.921299	1.4089	2.35937	4.45	6.95	8.85	10.65
0.87845	1.53778	2.39352	4	6.2	8.05	9.65
1.00416	1.65544	2.54331	3.85	6.15	8	9.45
0.985676	1.42118	2.28119	3.75	5.8	7.75	9.75
0.817044	1.17427	1.89556	3.55	5.4	7.25	9.65
0.757005	1.25403	1.97954	3.6	5.7	7.2	9.05
0.839744	1.29644	2.23733	3.85	5.95	7.7	9.25
0.836051	1.1955	2.11254	3.65	5.5	6.95	8.8
0.882098	1.40728	2.40331	4	5.95	7.25	8.9
0.908271	1.48929	2.52995	4.25	6.25	7.9	9.25
0.880909	1.28436	2.15548	3.95	6.05	7.4	8.9
1.01806	1.35031	2.1238	3.9	6.1	7.35	8.9
1.16749	1.39221	2.22007	4.2	6.5	8.05	9.7
1.35646	1.51135	2.50972	4.9	7.5	9.25	11.55
1.36293	1.60174	2.59067	5.45	8	9.9	12
1.0672	1.39257	2.32158	4.9	6.9	9	10.75
0.918535	1.24381	2.20688	4.2	6.3	8.65	11.05
0.891077	1.23775	2.27591	4.25	6.75	8.8	11.35
0.897737	1.37105	2.4406	4.5	6.95	8.45	10.75
1.01657	1.68796	2.79194	4.85	7.45	8.85	10.7
1.00396	1.66654	2.81624	4.95	7.4	9.15	10.9
0.894287	1.3744	2.41055	4.3	6.7	8.85	10.95
0.923696	1.22241	2.19772	4.1	6.5	8.75	10.9
0.926715	1.29854	2.19164	4.3	6.6	8.55	10.45
0.755299	1.33402	2.08164	3.55	5.8	7.7	9.7
0.895799	1.49664	2.36803	3.75	6.35	8.3	10.75
1.00584	1.58664	2.60972	4.35	7.2	8.9	11.05
0.960624	1.5251	2.51913	4.3	6.85	8.6	10.3
0.911026	1.34774	2.27637	4.1	6.15	7.75	9.4
0.875041	1.32326	2.30597	4.4	6.3	7.5	8.95
0.873628	1.40801	2.29258	4.35	6.6	7.95	9.8
0.888914	1.46146	2.27841	4.35	6.65	8.25	10.55
1.05907	1.67213	2.58368	5	7.35	8.9	10.8
1.30017	1.74156	2.76833	5.15	7.9	9.4	11.15
1.16569	1.57385	2.66211	4.9	7.6	9.4	11.45
0.883058	1.26094	2.37981	4.75	7.55	9.55	11.75
0.879687	1.23702	2.39172	4.6	7.6	9.4	11.7
0.821946	1.14554	2.10038	4.1	6.6	8.3	10.8
0.946576	1.45647	2.23548	4.25	6.45	7.95	10.1
1.06434	1.74702	2.63794	4.3	6.3	7.6	8.95
0.870197	1.39051	2.2756	3.6	5.35	7.1	8.6
0.884592	1.41144	2.30699	4.05	6.25	7.95	9.95
0.885619	1.46558	2.50238	4.5	6.8	8.1	9.95
0.733914	1.30016	2.20732	3.7	5.4	6.65	8.2
0.742707	1.19673	1.93213	3.2	4.95	6.2	7.25
0.81098	1.14611	1.78317	3.1	5.15	6.5	7.6
0.822417	1.1551	1.8013	3.35	5.45	6.9	7.85
0.703593	1.11802	1.81872	3.3	5.15	6.6	7.95
0.716954	1.22883	1.9097	3.3	5.1	6.85	8.6
0.884612	1.55367	2.46423	4.1	6	7.55	8.95
0.899931	1.52389	2.58537	4.15	6.05	7.4	9.75
1.0925	1.79954	2.9092	4.55	6.8	8.25	10.9
1.22352	2.11732	3.17078	5.15	7.75	9.4	11.45
1.28857	2.00871	3.16639	5.3	7.85	9.75	11.6
1.19352	1.67691	2.80841	5.05	7.25	9.2	11.25
0.914634	1.36399	2.31027	4.4	6.5	8.25	10.3
0.988153	1.54546	2.45589	4.45	6.9	8.4	9.95
1.00543	1.57326	2.44646	4.45	6.85	8.6	10.55
0.957504	1.5747	2.5288	4.5	6.9	8.8	11.15
0.918037	1.58704	2.42143	4.15	6.7	8.6	10.4
0.759342	1.31682	2.04934	3.35	5.35	6.8	8.6
0.651936	1.05077	1.72512	3.05	4.65	5.8	8.5
0.847386	1.26766	2.0628	3.95	6.15	7.55	9.75
1.0823	1.7248	2.56197	4.8	7.45	9.05	10.7
1.06455	1.80283	2.50437	4.6	6.85	8.25	10.55
0.821273	1.43165	2.1616	3.8	5.85	7.2	9.4
0.8393	1.41738	2.39364	3.95	5.95	7.25	9.5
1.1317	1.81232	3.07415	5.05	7.7	9.35	11.6
1.23328	1.9825	3.23427	5.2	8.05	10.05	11.95
1.20578	1.85987	3.04789	5.2	7.5	9.1	10.55
1.0964	1.48147	2.54442	5	7.3	9.05	10.55
0.937209	1.26692	2.20143	4.35	6.3	8.3	10.25
0.884899	1.34648	2.19809	4.15	6.15	8.15	10.1
0.880243	1.32375	2.21327	4.1	6.2	8.1	10.5
1.02667	1.61412	2.70378	4.5	6.7	7.95	10.6
1.15424	2.03817	3.156	5.1	7.65	8.55	10.95
1.10066	1.8904	2.85546	4.8	7.2	8.4	10.5
1.1041	1.48605	2.3993	4.75	7.25	9.2	10.85
1.08172	1.29488	2.35831	5	7.9	9.8	11.15
1.07871	1.4288	2.46272	4.95	7.75	8.95	10.3
1.11448	1.62379	2.63722	4.9	7.25	8.25	9.75
1.07942	1.66422	2.76083	4.7	6.95	8.1	9.7
1.01361	1.61642	2.64279	4.35	6.55	7.7	9.65
0.878883	1.43309	2.32159	3.65	5.35	6.35	8.7
0.721171	1.19924	1.94675	3.3	5.05	6.2	8.45
0.811217	1.32057	2.126	3.95	6.05	7.3	9.15
0.805349	1.3086	2.0589	3.75	5.8	7.15	8.85
0.861846	1.32081	2.15338	4.2	6.75	8.45	10.25
0.883136	1.40934	2.28976	4.5	7.45	9	10.9
0.798802	1.45188	2.28836	3.8	6.15	7.6	9.5
0.87335	1.58118	2.54072	3.85	5.8	7.45	9
0.926666	1.51574	2.34866	3.75	6.05	7.75	9.55
1.0829	1.68821	2.66216	4.45	7.05	8.7	11.15
1.39564	2.14402	3.45548	5.5	8	9.45	11.7
1.34126	2.00748	3.21652	4.9	7.45	9.15	11.65
1.02295	1.63959	2.67178	4.1	6.45	8.1	10.75
1.07772	1.85999	2.9378	4.45	6.65	8.45	10.6
1.18359	2.12911	3.27128	4.9	7.6	9.25	11.45
0.940808	1.77347	2.85387	4.4	7	8.25	10.35
0.742197	1.32185	2.35366	3.85	6.25	7.55	9.5
0.836958	1.44243	2.50122	4.05	6.6	8.05	9.9
0.891714	1.55087	2.63501	4.15	6.75	8.2	9.5
0.887667	1.43712	2.39622	4.1	6.35	7.6	9.05
0.919932	1.43205	2.20265	3.9	5.95	7.05	8.7
0.971421	1.45099	2.30129	4	6.3	7.5	9.35
0.862297	1.35699	2.1934	3.85	6.1	7.6	9.2
0.745013	1.21767	1.97713	3.55	5.65	7.3	8.8
0.768213	1.07335	1.7554	3.5	5.55	7.3	9.3
0.74809	1.11311	1.67924	3.35	5.25	6.85	9
0.792266	1.35338	2.02014	3.45	5	6.1	8.55
0.754106	1.30478	1.97223	3.4	4.8	5.95	7.95
0.6626	1.05744	1.76269	3.4	5.1	6.8	8.65
0.764272	1.12617	1.84731	3.5	5.45	7.35	9.55
0.922935	1.41206	2.23356	4.05	6.55	8.55	10.35
0.939401	1.4253	2.44069	4.55	7.4	9.25	10.9
1.02361	1.56421	2.59669	4.7	7.2	9.1	11
1.01609	1.52857	2.50757	4.6	6.75	8.5	10.85
0.880565	1.19259	2.14578	4.3	6.7	8.55	11.15
0.781014	1.09448	1.95874	3.8	6.55	8.5	10.4
0.826554	1.26086	2.04012	3.9	6.3	8.15	9.9
1.02062	1.51724	2.59577	5.1	7.45	9.55	11.4
1.03582	1.55674	2.79235	5.2	7.75	9.35	11.05
1.13327	1.68051	2.71753	4.8	7.3	8.7	10.3
0.926682	1.31751	2.18538	3.95	6.2	7.95	9.55
0.697623	1.02779	1.86385	3.45	5.45	7.05	8.75
0.867384	1.28938	2.10805	4.2	6.45	8.05	10.15
0.951415	1.49776	2.37216	4.85	7.35	9.05	11.3
0.97891	1.74779	2.84715	4.85	7.3	8.75	10.75
0.967421	1.65627	2.80554	4.6	7.1	8.6	10.75
0.992961	1.47785	2.57454	4.6	6.95	8.65	10.2
1.02633	1.51245	2.57482	4.75	7.15	8.95	10.45
1.00438	1.46897	2.51857	4.8	7.45	9.05	11.05
0.990016	1.40399	2.38518	4.65	7.2	8.9	10.85
1.03685	1.45271	2.38425	5	7.55	10.1	12.05
1.05674	1.37428	2.43184	5.1	7.7	10.1	11.65
1.06402	1.38368	2.41645	4.9	7.4	8.95	10.6
1.01222	1.40075	2.34602	4.55	6.75	8.45	10.65
0.848447	1.16032	1.95608	3.95	5.75	7.3	9.6
0.784892	1.00552	1.72466	3.7	5.4	6.65	8.85
1.00086	1.17399	2.06792	4.2	6.35	8.1	10.35
1.23603	1.45809	2.44128	4.85	7.35	9.4	11.2
1.00185	1.28518	2.16821	4.25	6.55	8.4	10.2
0.780388	1.10485	1.97986	3.7	5.95	7.4	9.45
0.807002	1.23066	2.04717	3.6	5.7	7	8.55
0.825072	1.27411	1.93226	3.4	5.2	6.75	8.15
0.760891	1.20005	1.84369	3.3	4.9	6.6	8.2
0.671146	1.12477	1.75266	3	4.55	6.1	8.05
0.686307	1.1423	1.7565	3.2	5.15	6.6	8.95
0.811376	1.30963	2.07433	3.95	6.4	7.9	10.5
0.904609	1.41243	2.35333	4.2	6.7	8.55	10.8
0.802494	1.24151	2.0699	3.55	5.7	7.95	9.95
0.802725	1.20673	2.00604	3.65	6	8.1	9.9
0.96627	1.34957	2.31139	4.2	6.5	7.95	9.65
0.921548	1.29072	2.04574	3.8	5.85	7.35	9.1
0.851198	1.227	1.90274	3.8	5.85	7.4	9.25
0.835201	1.15523	1.95191	3.8	5.8	7.15	8.9
0.746608	1.02147	1.79631	3.6	5.55	7	8.4
0.797922	1.18567	1.94654	3.9	5.65	6.85	8.4
0.807983	1.22485	1.90398	3.6	5.2	6.25	8.45
0.686619	1.01611	1.69398	3.1	4.85	6.5	8.45
0.64137	0.992912	1.7094	3.15	5.25	6.85	8.5
0.70487	1.10741	1.78245	3.45	5.45	6.85	8.35
0.849595	1.19505	1.92434	3.9	5.85	7.25	8.05
0.888877	1.2338	1.9767	4.05	5.9	7.35	8.8
0.837325	1.32835	2.00065	3.95	5.5	7.05	9.4
0.937042	1.35517	2.09868	3.85	5.85	7.4	9.65
0.927171	1.26497	2.21933	3.75	6.05	7.65	9.9
0.913706	1.24972	2.10601	3.7	5.8	7.15	9.35
1.16569	1.45419	2.28718	4.5	6.6	8	10.15
1.12676	1.4351	2.43127	4.85	6.95	8.3	10.95
0.935733	1.24957	2.24273	4.45	6.8	8.35	11.1
1.07513	1.43042	2.55409	5.05	7.75	9.75	12.3
1.09498	1.57249	2.85358	5.2	7.45	9.3	11.8
1.05399	1.56306	2.88411	4.9	7.1	8.8	11
0.970401	1.40302	2.61043	4.45	6.95	9.05	10.95
0.964948	1.37311	2.53348	4.55	6.7	8.65	10.65
1.00633	1.30486	2.33787	4.65	6.9	8.45	10.6
1.00448	1.43274	2.44133	4.6	6.95	8.55	10.75
0.929904	1.57146	2.59512	4.25	6.55	8.2	10.35
0.732257	1.25231	2.0016	3.15	5.4	7.4	9.15
0.803741	1.30486	2.2031	3.8	6.3	8.15	9.7
0.968111	1.60909	2.78756	4.85	7.4	8.85	10.1
1.01279	1.71254	2.67403	4.5	6.85	8.6	10.3
0.960523	1.58277	2.42515	4.05	6.2	7.75	10.05
0.739722	1.14	1.9522	3.4	5	6.45	8.3
0.646631	0.901066	1.60981	3	4.75	6.5	8.3
0.799934	1.16062	1.85793	3.7	6	7.9	10
1.01119	1.68917	2.44576	4.5	7	8.65	10.9
1.18734	1.98893	2.9148	5.05	7.4	9.25	11.45
1.13677	1.76509	2.84021	4.95	7.5	9.75	12
1.1356	1.81354	3.159	5.25	8.05	9.9	12
1.09835	1.82982	3.10623	5.05	7.65	9.2	10.65
0.792653	1.33253	2.25357	3.6	5.65	7.1	8.95
0.695696	1.10596	1.95089	3.6	5.2	6.8	9.15
0.882757	1.38077	2.3551	4.5	6.55	8.35	10.25
0.954395	1.50059	2.67662	4.75	7.2	8.9	10.55
1.0635	1.61722	2.79604	5.05	7.5	9	10.65
1.2659	1.92074	3.01846	5.3	7.75	9.2	11.2
1.13031	1.76317	2.81756	4.65	7.1	8.9	11.1
1.00241	1.59905	2.85123	4.6	7.2	9.3	11.25
1.06638	1.69375	2.96804	5	7.3	8.8	10.5
0.89367	1.41669	2.37332	4.25	6.3	7.7	9.9
0.913589	1.43282	2.34832	4.15	6.4	8.05	9.8
0.94044	1.66252	2.74154	4.6	6.8	8	9.05
0.814065	1.58398	2.69685	4.25	6.1	7.15	8.8
0.793689	1.44756	2.33461	3.65	5.3	6.85	9
0.989558	1.46162	2.3005	4.2	6.3	8.1	10.35
1.20093	1.57944	2.54235	5.05	7.6	9.65	11.65
1.16254	1.68563	2.82498	5.1	7.4	9.45	10.95
0.946051	1.37519	2.38591	4.4	6.4	8.25	10
0.750605	1.0139	1.82935	3.6	5.5	7.25	9.2
0.736743	1.12982	1.92926	3.3	5.45	6.9	8.5
0.776069	1.25279	2.07372	3.65	6.45	8.05	9.85
0.912058	1.28088	2.25229	4.65	7.35	9.05	10.65
0.949824	1.21907	2.16951	4.55	6.65	8.4	10.35
0.996058	1.46174	2.42815	4.65	6.75	8.6	10.8
1.22419	2.08276	3.15728	5.35	7.55	9.4	11.1
1.05576	1.89095	2.80658	4.35	6.35	8.35	10.5
0.797397	1.42776	2.27595	3.7	6	8	10.25
0.790041	1.32678	2.34243	3.95	6.55	8.2	10.15
0.774644	1.18884	2.1468	4.1	6.5	8.1	9.65
0.808756	1.21913	2.12892	3.95	5.8	7.25	8.7
0.801593	1.39152	2.28501	3.6	5.65	6.55	8.05
0.7084	1.30923	2.0727	3.3	5.7	6.75	8.05
0.594687	0.946537	1.59276	3	4.8	6.1	7.75
0.530404	0.81921	1.37167	2.9	4.6	5.75	7.4
0.575933	0.996926	1.55325	3	4.9	6.35	8
0.679245	1.1959	1.91061	3.25	4.95	6.45	8.3
0.686923	1.21564	1.96602	3.3	5	6.45	8.9
0.871152	1.58067	2.57075	4.35	6.7	8.3	10.9
1.11142	2.09515	3.263	5	7.45	9.25	11.45
1.14894	2.02658	3.08884	4.75	6.75	8.6	10.9
1.0596	1.73632	2.70082	4.5	6.8	8.85	11.05
0.991189	1.58192	2.44413	4.3	6.95	9.15	11.05
0.894787	1.31178	2.16565	4.1	6.55	8.3	10.15
0.917011	1.51105	2.35084	3.9	6.45	7.9	9.85
1.17565	2.03517	3.16161	4.55	7.2	8.75	10.9
1.2126	2.02049	3.3902	5.1	7.7	9.65	11.8
1.14548	1.71324	2.95016	5.1	7.85	9.7	11.8
0.977824	1.40712	2.28468	4.15	6.65	8.5	11
0.888281	1.46578	2.23473	3.75	6.25	7.9	9.85
0.901542	1.49452	2.35831	4.2	6.75	8.05	9.35
0.967866	1.41087	2.51862	4.45	6.75	7.95	9.55
0.973598	1.523	2.72077	4.35	6.45	7.55	9.65
0.842261	1.53824	2.43164	3.9	5.75	7.2	8.85
0.813409	1.31314	2.06765	3.7	5.65	7.6	9.45
0.88424	1.34862	2.30624	4.15	6.5	8.6	11.05
1.02769	1.71515	2.86756	4.7	7.55	9.5	11.45
0.995224	1.77684	2.82281	4.3	7	8.8	10.65
0.832384	1.47041	2.49756	3.9	6	7.4	9.5
0.828197	1.44251	2.37123	3.85	6.25	7.65	9.55
0.887244	1.58524	2.4404	3.95	6.75	8.5	10.15
0.792625	1.3136	2.19531	3.85	6.15	7.75	9.5
0.813183	1.2447	2.08551	4.1	6.3	7.8	9.8
0.865194	1.39119	2.25986	4.35	6.9	8.25	10.65
1.01321	1.70777	2.62634	4.6	7.25	8.8	11.25
1.04213	1.68625	2.63161	4.45	6.95	9	11.45
1.011	1.64548	2.67347	4.45	7.1	9.05	10.95
1.30308	2.11287	3.36108	5.7	8.7	10.6	12.15
1.2482	2.03425	3.34762	5.8	8.9	10.6	12.2
1.11612	1.87044	3.02361	5.25	8.15	9.55	10.85
1.22166	1.89759	3.07278	5.7	8.45	10.2	11.8
1.10995	1.57482	2.79935	5.65	8.75	10.95	13.05
0.999661	1.51039	2.63377	5.05	8.1	10.3	12.4
1.01816	1.61727	2.74784	4.95	7.7	9.55	11.3
1.02556	1.6753	2.81256	4.75	7.4	9.1	10.7
1.06592	1.85415	2.9842	4.45	7.45	9.3	10.9
0.909752	1.66054	2.7074	3.95	6.65	8.3	10.1
0.873286	1.6188	2.57738	4.05	6.45	8.1	10.2
1.0078	1.77673	2.78351	4.45	7.5	9.2	11.7
1.03468	1.80548	2.82204	4.35	7.25	8.95	11.75
0.997844	1.74561	2.75618	4.2	6.8	8.7	10.95
0.996847	1.66639	2.78162	4.65	7.35	8.9	10.65
0.972647	1.63564	2.66869	4.6	6.95	8.1	10.1
0.936035	1.52385	2.46899	4.25	6.45	7.9	10.1
1.00331	1.51184	2.38518	4.7	7.2	9.1	11.25
0.976796	1.56348	2.42659	4.65	7.45	9.3	11.8
0.956072	1.50011	2.65549	4.6	7.5	8.9	11.2
1.0141	1.51762	2.59006	4.55	7.15	8.6	10.5
1.11973	1.90957	2.88782	4.8	7.15	8.85	11
1.07605	1.91664	2.93169	4.75	7.1	9.05	11.3
1.02614	1.7511	2.7574	4.35	6.65	8.45	10.5
0.959074	1.54755	2.46974	4.1	6.45	8	9.75
0.93764	1.43092	2.33015	4.3	6.9	8.55	10.6
0.962902	1.56348	2.58863	4.5	7.35	9.1	11.3
1.07293	1.69594	2.78433	4.55	7.1	8.9	10.9
1.1918	1.95034	3.27705	5	7.45	9.45	11.5
1.02411	1.77357	2.9978	4.6	7.4	9.65	12.1
1.07584	1.62679	2.80493	5.2	8.2	10.45	12.9
1.20711	1.57922	2.92514	5.9	8.85	11	12.75
1.02801	1.25982	2.45378	5.05	8.05	9.85	11.25
0.881332	1.24249	2.17725	4.05	6.85	8.4	9.7
0.876162	1.4604	2.42289	3.9	6.2	8	9.85
1.02225	1.60911	2.8438	4.95	7.6	9.7	11.8
1.15367	1.91187	3.1699	5.45	8.1	10.2	12.1
1.17115	2.1698	3.23513	5.15	7.65	9.9	12.4
1.16096	2.05683	3.0989	5	7.65	9.75	12.65
1.0916	1.82799	3.17229	5.3	7.85	9.7	12.45
1.05638	1.83443	3.2235	5.25	7.65	9.55	12.3
0.988953	1.71174	2.90612	4.6	6.85	8.5	11
0.862735	1.34449	2.40986	4.1	6.65	8.15	10.7
1.0164	1.5091	2.56797	4.65	7.5	9.35	11.5
1.07583	1.7183	2.76705	4.75	7.45	9.15	10.85
1.01023	1.66682	2.78892	4.6	7.35	8.75	10.95
1.04581	1.67731	2.99673	5.2	8.15	9.7	11.9
1.02541	1.6874	3.05373	5.5	8.55	10.05	11.45
0.971275	1.61035	2.72856	5	7.65	9.05	10.15
0.97036	1.51167	2.40065	4.55	7.1	8.85	10.45
0.969727	1.42847	2.38921	4.55	7.1	9.2	10.7
0.939517	1.49138	2.58508	4.4	6.9	8.8	10.5
0.9786	1.53578	2.61969	4.3	6.9	8.55	10.6
0.866986	1.23816	2.19743	3.85	6.3	8.25	10.45
0.922156	1.25996	2.32737	4.15	6.95	8.8	11.15
1.00749	1.51598	2.71382	4.6	7.45	9.15	11.5
0.954655	1.64195	2.74464	4.5	7.5	9.45	11.7
1.01556	1.81482	2.90828	4.65	7.85	9.4	11.65
1.01198	1.77513	2.87279	4.5	7.5	8.95	11.2
1.07442	1.73181	2.8456	4.65	7.45	9.1	11.05
1.04561	1.7365	2.90182	4.85	7.7	9.15	11.1
1.04103	1.78154	2.73818	4.7	7.45	9.2	11.3
1.04755	1.82536	2.71334	4.5	6.75	8.55	10.45
0.884838	1.60488	2.46991	3.75	5.85	7.05	9.4
0.851348	1.56175	2.43419	3.6	5.75	7.1	9.55
0.821492	1.5442	2.49059	3.75	6	8	9.8
0.930345	1.65327	2.78353	4.4	6.8	9.05	11.4
1.12937	2.13153	3.4497	5.3	7.95	9.95	13
1.14023	2.14855	3.43387	5.05	7.95	9.85	12.55
0.941386	1.68237	2.83675	4.3	7.3	8.9	10.4
0.733137	1.35856	2.14693	3.45	6	7.25	8.55
0.762305	1.32218	2.05819	3.35	5.5	6.85	8.8
0.832565	1.45472	2.33206	3.6	5.6	6.8	8.4
0.679393	1.1834	1.90357	3	4.7	5.8	7.3
0.549459	0.840926	1.43052	2.5	4.6	5.95	7.6
0.633818	1.02815	1.7984	2.95	5.55	7.1	8.9
0.862714	1.33981	2.25997	4.1	6.85	8.35	10.75
1.07439	1.58232	2.52585	4.95	7.9	9.15	11.05
1.06137	1.63247	2.57383	4.75	7.5	8.9	10.35
0.974949	1.5487	2.66325	4.55	7.2	8.8	10.55
1.0367	1.7279	2.86222	4.6	7.15	8.6	10.55
0.995171	1.67322	2.58314	4.2	6.2	7.85	10.2
0.899142	1.36517	2.24061	4.15	6.45	8.55	11.3
1.00101	1.38592	2.35068	4.75	7.7	9.95	12.7
1.14285	1.70287	2.76656	4.95	7.9	10.05	12.6
1.15682	1.89595	2.95298	4.75	7.55	9.25	11.6
1.02925	1.74458	2.87722	4.65	7.3	9.25	11.1
1.08514	1.93529	3.18502	4.85	7.8	10.05	11.8
1.17976	2.07171	3.31626	5.1	8.4	10.3	12.8
1.1005	1.86532	3.07892	5.15	8.2	10.55	13.6
1.0851	1.7793	3.02262	5.15	8	10.5	13.1
1.25716	1.91093	3.08706	5.3	8.1	10.2	12.05
1.32728	2.13829	3.24622	5.35	8.3	10.35	12.45
1.05705	1.73824	2.79966	4.7	7.75	9.45	11.65
0.850557	1.35168	2.20446	3.9	6.4	7.65	9.55
0.803785	1.36689	2.06269	3.55	5.6	7.05	8.8
0.813944	1.43677	2.2054	3.6	5.4	6.85	8.35
0.828178	1.41	2.23033	3.75	5.4	6.95	8.85
0.897268	1.50792	2.37255	3.95	6	7.8	10.2
1.00741	1.76825	2.77418	4.55	6.85	8.3	10.05
0.946079	1.59568	2.52366	4.25	6.55	8.25	9.55
0.931884	1.40451	2.27553	4.05	6.4	8.45	10.25
1.05046	1.39379	2.43144	4.6	6.85	8.8	10.65
0.916339	1.18303	2.13029	4.05	6.1	7.9	9.4
0.807531	1.18599	2.14668	3.85	6.15	8.2	9.85
0.991844	1.52016	2.65042	4.55	7.15	8.9	10.9
1.19054	1.81914	2.88876	5.35	8.05	9.5	11.4
0.995391	1.51428	2.38816	4.8	7.4	9.45	11.4
0.811081	1.23722	1.99264	4.05	6.65	8.65	10.85
1.03466	1.49166	2.52258	4.95	7.7	9.4	11.95
1.03357	1.46129	2.57133	5.3	7.8	9.7	12.55
1.0038	1.45951	2.49166	5	7.25	9.4	11.8
1.05905	1.58471	2.45463	4.7	6.55	8.5	10.65
0.978909	1.47364	2.19112	4.25	5.95	7.6	9.6
0.896423	1.35432	2.30096	4.4	6.35	7.75	9.7
0.825414	1.2931	2.28211	4.3	6.4	7.8	9.85
0.770515	1.2159	2.02236	3.6	5.75	6.8	8.45
0.717869	1.10418	1.84306	3.2	5.3	6.2	8.1
0.708227	0.967056	1.69703	3.35	5.05	6.15	8.25
0.815873	1.24932	2.00212	3.75	5.3	6.25	8.15
1.03297	1.49619	2.4673	4.35	6.45	7.5	9.25
1.09782	1.50864	2.58598	4.5	6.8	8.2	9.7
0.965341	1.50254	2.4848	4.15	6.5	7.85	9.95
0.947361	1.44045	2.48854	4.3	7	8.25	10.8
0.93284	1.36834	2.4484	4.15	6.75	8.45	10.55
0.805489	1.25476	2.09792	3.65	5.9	7.75	9.3
0.800037	1.33983	1.98603	3.5	5.85	7.55	9.2
0.837375	1.46666	2.25941	3.75	6.25	8.05	9.75
0.791985	1.40902	2.23716	3.55	6	7.7	9.7
0.664791	1.15907	1.82382	2.85	5.2	6.85	9.3
0.603091	1.05308	1.62429	2.65	4.85	6.35	7.95
0.687936	1.17838	1.77461	2.95	5.1	6.4	7.8
0.716098	1.23915	1.93381	3.25	5.25	6.8	8.55
0.730424	1.24627	2.01377	3.45	5.3	6.9	9.05
0.732177	1.24515	2.05234	3.4	5.55	7	9.45
0.848392	1.41622	2.36977	4.15	7.05	9	11.5
1.02639	1.71044	2.75579	5.15	8.3	10.75	13.6
0.986251	1.58284	2.67679	4.95	7.85	10.15	12.45
0.998876	1.57493	2.79793	4.9	7.65	9.5	10.95
0.935709	1.64054	2.73631	4.5	6.95	8.4	9.9
0.816112	1.39007	2.32246	3.7	5.7	7.2	9.2
0.936563	1.47046	2.31066	4.2	6.55	8.05	10.3
1.04039	1.72245	2.51378	4.9	7.8	9.35	11.25
0.917131	1.54143	2.35863	4.35	6.9	8.6	10.5
0.860631	1.50004	2.37303	4.05	6.05	7.85	9.95
0.806175	1.4313	2.29729	3.8	5.6	7.3	9.1
0.807146	1.34858	2.28357	3.95	6.2	7.7	9.6
0.949034	1.5926	2.64218	4.4	6.6	8.05	10.15
0.936099	1.48964	2.50152	4.2	6.3	7.85	9.95
0.929515	1.49648	2.41334	4.05	6.3	8	10.5
0.872802	1.44651	2.32678	4.1	6.5	8.45	10.85
0.893321	1.4395	2.45627	4.35	7.3	9.35	11.35
0.83876	1.40014	2.41217	3.9	6.55	8.15	9.8
0.820643	1.39969	2.2385	3.65	5.9	7.35	9.1
0.944262	1.49046	2.22788	3.95	6.2	7.8	10.1
0.980496	1.4698	2.31899	4.4	7	8.85	11.45
0.908405	1.45759	2.31694	4.2	7	9.1	11.9
0.890572	1.60213	2.42997	4.05	6.35	8.2	10.35
1.14166	2.05725	3.01452	4.55	6.75	8.15	9.5
1.19245	2.04248	2.88508	4.4	6.95	8.5	10.25
1.02229	1.76267	2.6276	4.15	6.6	7.8	9.65
0.961763	1.68436	2.67876	4.2	6.4	7.55	9.5
0.93043	1.47627	2.50345	4.15	6.75	8.75	11.3
1.03853	1.63277	2.8223	4.8	7.25	9.3	11.3
1.09411	1.79205	2.95007	5.15	7.3	9	10.5
0.971608	1.48771	2.58283	4.65	7.2	9.05	10.85
1.05331	1.72806	2.87601	4.6	7.1	8.7	11.1
1.05416	1.85283	2.85498	4.45	6.95	8.4	11
0.971216	1.60988	2.60754	4.85	7.45	9.15	11.25
1.15121	1.77549	2.78897	5.25	8.1	9.8	11.3
1.1604	1.75855	2.97417	4.85	7.8	9.55	11.15
1.04574	1.48709	2.75073	4.65	7.35	9.25	11
1.06554	1.60044	2.67033	4.6	7.25	9.2	11.2
1.06307	1.90891	3.05112	4.65	7.1	8.65	10.75
0.979771	1.6455	2.6797	4.45	6.6	8.5	10.3
0.846987	1.22941	2.05116	4	6.2	8.3	10.45
0.829182	1.31673	2.16479	4	6.15	7.95	9.9
0.954567	1.47955	2.52249	4.55	6.75	8.4	9.65
1.00236	1.52577	2.5958	4.45	6.85	8.45	9.85
0.906396	1.55962	2.51631	4.05	6.3	8.05	10.05
0.949125	1.66535	2.61472	4.2	7	8.6	10.7
1.10395	1.92821	3.05317	4.8	7.95	9.35	11.3
1.08414	1.80013	3.08366	5.2	8	9.2	10.95
0.853364	1.34572	2.31412	4.25	6.8	7.9	9.3
0.936661	1.4363	2.26434	4	6.55	7.85	9.5
1.04312	1.50621	2.57727	4.25	6.55	8	10.15
1.00366	1.58399	2.55451	4.5	7	8.65	11
1.16808	1.84197	2.8653	5.35	8.25	10.4	12.8
1.21134	1.87715	3.09302	5.45	8	10.15	12.4
1.01153	1.70146	2.70387	4.35	6.75	8.4	10.5
0.772534	1.33864	2.05723	3.4	5.7	7.25	9.4
0.89815	1.38415	2.31427	4.4	6.9	8.5	10.45
1.16274	1.61242	2.76666	5.25	7.8	9.35	11.7
1.17554	1.64899	2.73951	4.8	7.1	8.8	11.6
1.10936	1.70736	2.95805	5.05	7.4	9.4	11.7
1.13726	1.88374	3.34711	5.5	8	10.3	12.3
0.985541	1.71172	2.93186	4.65	7.4	9.4	11.6
0.780568	1.4165	2.34936	3.85	6.6	7.85	10.3
0.789606	1.48042	2.4053	3.75	6.1	7.25	9.55
0.896989	1.62535	2.56263	3.9	6.3	7.7	9.95
0.906456	1.52762	2.39346	4.2	6.7	8.4	10.4
0.844822	1.39708	2.23164	4.15	6.5	8.15	10
0.870249	1.48692	2.41582	4.05	6.7	7.9	9.55
0.826013	1.39437	2.2728	3.65	5.9	6.8	8.25
0.852388	1.51079	2.34677	3.85	5.95	6.95	8.4
0.959952	1.724	2.64743	4.25	6.65	8.15	9.65
0.988018	1.70001	2.59801	4	6.35	7.95	9.75
1.03434	1.60773	2.66777	4.25	6.45	8	10.05
1.05758	1.39117	2.64957	4.7	6.85	8.5	10.35
0.990131	1.44567	2.55318	4.55	7	8.25	9.85
0.981418	1.6307	2.71519	4.4	6.6	7.85	9.35
0.972678	1.45289	2.5948	4.65	6.9	8.55	10.5
0.901668	1.37197	2.4943	4.45	6.85	8.65	11.5
0.883907	1.47549	2.60308	4.5	7.1	8.6	11.4
0.920723	1.4703	2.41925	4.55	7.2	8.7	11.3
1.0075	1.66421	2.67026	4.6	6.85	8.45	10.85
1.17367	1.7255	2.83756	5.05	7.4	8.65	10.65
1.15175	1.51791	2.70538	5.1	7.4	8.9	11.1
1.0024	1.3862	2.53896	4.95	7.4	9.55	11.85
1.20405	1.62666	2.70683	5.3	8.3	10.3	11.85
1.13398	1.58382	2.60322	4.9	7.65	9.15	10.7
0.899416	1.38713	2.30054	4.2	6.7	8.3	10.55
1.12805	1.82804	2.96895	5.05	7.85	9.75	12.1
1.25084	1.92522	3.37913	6	9.1	11.3	13.45
1.24715	1.82455	3.47711	6.25	9.3	11.45	13.55
1.15894	1.77325	3.16923	5.35	8.2	10.2	12.35
[truncated: 6,256 more rows]

## Sheet: deathvalleyintermediate
1.98823	2.96621	4.06257	5.45	7.8	9.8	11.25
1.72136	2.62101	3.80465	5.1	7.25	9.1	10.45
1.42457	2.30136	3.42902	4.65	6.7	8.55	10.8
1.38116	2.40618	3.576	4.6	6.7	8.65	11.45
1.47589	2.59242	3.85851	4.95	7.15	8.75	11.1
1.8782	3.13818	4.46262	5.8	7.75	9.35	11.65
1.81548	3.0457	4.36717	5.65	7.45	9.35	11.6
1.72582	2.83046	3.98886	5.15	7.45	9.2	11.25
1.93598	3.25731	4.43798	5.55	7.85	9.65	11.3
1.77274	3.03116	4.24762	5.3	7.25	8.85	10.95
1.63041	2.74321	3.87167	4.95	7	7.95	10.25
1.48054	2.55577	3.51149	4.75	6.9	8.05	9.7
1.29469	2.43131	3.50361	4.8	6.8	8.3	9.95
1.37751	2.59069	3.83813	5.15	7.35	8.7	10.25
1.35775	2.33169	3.46006	4.75	7.05	8.5	9.9
1.22821	2.04588	2.99609	4.1	5.9	7.25	8.75
1.10157	1.82224	2.69493	3.6	5.15	6.45	7.95
1.15762	1.94719	2.83448	3.85	5.45	6.45	7.95
1.27597	2.15538	2.9864	4.15	5.9	6.9	8.2
1.038	1.77809	2.53047	3.55	5.1	6.3	7.45
0.864423	1.47126	2.22735	3.05	4.45	5.55	7.25
1.22369	2.08902	2.92958	4	5.75	6.95	8.25
1.43546	2.27328	3.10552	4.3	5.9	7.1	8.15
1.26326	1.8833	2.56638	3.6	4.95	6.15	7.75
1.01573	1.65624	2.26363	3.15	4.8	5.95	7.7
1.16399	1.96055	2.68611	3.4	5.3	7.05	9.3
1.60427	2.59809	3.5902	4.5	6.3	8.15	10.35
1.54925	2.38998	3.37497	4.5	6.05	7.1	8.3
1.28437	2.08099	2.84189	3.95	5.3	6.35	7.8
1.28274	2.27656	3.17321	4.25	5.65	7.2	9.6
1.39881	2.3933	3.4271	4.55	6.3	8.2	10.45
1.45488	2.46309	3.42923	4.55	6.65	8.55	10.55
1.44948	2.45148	3.38866	4.5	6.6	8.25	10.55
1.32837	2.22988	3.25699	4.35	6.55	8.4	10.85
1.22374	2.16737	3.21749	4.3	6.75	8.35	10.15
1.20693	2.05976	3.01626	4.2	6.3	7.5	9.35
1.29729	2.01691	2.92087	4.05	5.85	7.05	9.15
1.28731	2.03514	2.82007	3.75	5.6	6.65	8.75
1.16135	2.00224	2.76627	3.7	5.45	6.5	8.55
1.24292	2.10724	3.08866	4.15	6.2	7.5	9.1
1.24254	2.09424	3.21448	4.35	6.45	7.65	9.45
1.18752	2.02353	3.06203	4.35	6.25	7.05	8.6
1.16449	1.83011	2.61941	3.85	5.55	6.55	7.4
1.13285	1.68595	2.2995	3.25	4.6	5.75	7
1.14888	1.98969	2.82975	3.7	5.3	6.85	8.45
1.20052	2.18804	3.18359	4.25	6.35	8	9.4
1.36327	2.30108	3.29136	4.45	6.75	8.05	9.65
1.26257	2.09443	3.02938	4.1	5.95	7.35	9
1.05873	1.8099	2.6558	3.75	5.3	6.4	7.85
1.1141	1.97132	2.86771	3.95	5.8	6.6	8.5
1.21458	2.15968	3.01483	4.05	5.9	7.1	8.85
1.09633	1.92788	2.7122	3.75	5.65	6.9	7.95
1.03755	1.9	2.75989	3.9	5.85	7.05	8.4
1.27584	2.36161	3.43859	4.6	6.5	7.95	9.55
1.2483	2.15207	3.15335	4.15	5.9	7.45	9.15
1.16846	1.98652	2.86624	3.9	5.55	7	8.4
1.29452	2.14265	2.96482	4.05	5.7	7	8.4
1.14459	1.89142	2.54809	3.5	5.3	6.65	8.45
1.32784	2.26974	3.14152	4.25	6.4	7.65	9.9
1.62542	2.72968	3.85514	5.15	7.3	8.95	11.05
1.43219	2.54583	3.79263	5.25	7.45	9.35	10.95
1.27697	2.31962	3.48959	4.9	6.85	8.65	11.05
1.35095	2.41296	3.3915	4.65	6.35	8.15	10.5
1.34448	2.45981	3.39237	4.6	6.45	8.4	10.4
1.24439	2.29504	3.39174	4.5	6.6	8.7	10.85
1.37925	2.56588	3.83555	5.15	7.6	9.05	10.8
1.32257	2.34743	3.45926	4.85	7.15	8.4	10
1.38762	2.32945	3.32026	4.75	6.8	8.05	9.95
1.63885	2.6297	3.56111	5.05	6.95	8.15	10.75
1.76761	2.75213	3.73686	5.1	7	8.45	11.2
1.65378	2.6742	3.76604	5.15	7.4	8.9	11.05
1.46613	2.47961	3.49304	4.8	6.9	8.25	10.05
1.49593	2.56071	3.49437	4.45	6.2	7.6	9.4
1.49534	2.44214	3.34591	4.4	6.4	7.8	10.05
1.60099	2.6384	3.71083	5.1	7.35	8.75	11.1
1.57733	2.70152	3.79798	5.1	7.4	8.9	10.8
1.39483	2.38232	3.35856	4.55	6.7	8.05	10.35
1.29107	2.16572	3.04585	4.1	5.85	7.15	9.95
1.24583	2.13237	2.96504	3.9	5.65	7.25	9.75
1.32822	2.36489	3.37055	4.35	6.25	7.75	9.85
1.42139	2.48828	3.77086	5	7	8.15	9.7
1.36365	2.50474	3.80995	5.05	7.1	8.6	10.2
1.26497	2.33497	3.41625	4.35	6.65	8.2	10.4
1.28158	2.23976	3.39805	4.4	6.85	8.25	10.35
1.39344	2.47579	3.79151	4.95	7.25	8.5	10.3
1.37658	2.41054	3.55214	4.65	6.75	7.95	9.65
1.36454	2.18919	3.09295	4.25	6.3	7.5	9.65
1.52042	2.30049	3.23815	4.5	6.85	7.6	9.85
1.61768	2.45828	3.40826	4.7	6.95	7.7	9.15
1.45607	2.29564	3.19147	4.35	6.05	7.1	8.1
1.09988	1.80376	2.58292	3.45	4.85	6.1	7.3
1.06763	1.7534	2.57378	3.55	5.25	6.7	8.35
1.40282	2.50652	3.66395	4.75	6.85	8.2	9.75
1.46001	2.46766	3.68646	4.75	6.85	8.25	9.95
1.3495	2.04956	3.07774	4.25	6.35	7.9	9.6
1.48875	2.4118	3.42513	4.75	7	8.3	9.8
1.41467	2.40496	3.40291	4.65	6.75	7.9	9.65
1.35258	2.36771	3.1481	4.35	6.35	7.7	9.7
1.37021	2.37917	3.07094	4.4	6.45	7.8	10
1.46781	2.36947	3.28567	4.7	6.8	8.3	10.45
1.56704	2.53759	3.57364	5.05	7.25	8.8	10.9
1.50649	2.46216	3.47451	4.9	7.25	8.45	10.4
1.35794	2.13232	3.04957	4.45	6.7	7.8	9.6
1.22434	1.98563	2.8293	4.05	5.9	7.5	9.45
1.46932	2.44283	3.50231	4.9	6.65	8.25	10.3
1.49561	2.65431	3.76531	5.15	6.9	8.4	10.5
1.40976	2.53029	3.60513	4.65	6.7	8.45	10.35
1.55506	2.77642	3.99287	5.2	7.7	9.2	11.05
1.41287	2.68048	3.7801	5.05	7.35	8.8	11.15
1.29703	2.26084	3.20298	4.3	6.4	7.7	10
1.57435	2.62094	3.63263	4.65	6.85	8.1	10.1
1.60506	2.89463	3.95492	5	7.3	8.7	10.75
1.50182	2.62213	3.65286	4.9	7.25	8.95	11.3
1.75617	2.88044	3.94926	5.4	7.6	9.15	11.05
1.66364	2.83145	3.87398	5.3	7.3	8.45	10
1.5283	2.56656	3.64786	4.85	6.85	8.1	9.65
1.69071	2.75098	3.79011	4.85	6.8	8.05	9.65
1.67321	2.68139	3.61909	4.85	6.85	8.05	9.65
1.50301	2.5417	3.49832	4.8	7.05	8.45	9.9
1.32853	2.37898	3.32944	4.45	6.6	8.35	10.45
1.32769	2.33642	3.37505	4.45	6.7	8.4	10.6
1.32136	2.30251	3.33406	4.45	6.6	8.05	10.3
1.33694	2.27754	3.19016	4.3	6.25	7.55	9.7
1.38992	2.31029	3.21478	4.4	6.45	7.55	9.05
1.31268	2.24557	3.12528	4.25	6.15	7.4	8.9
1.1349	2.01408	2.87702	3.85	5.65	7.05	8.4
1.09729	1.88521	2.7165	3.6	5.35	6.8	8
1.18709	2.03629	2.85655	3.8	5.5	7	8.4
1.12207	1.8357	2.48583	3.5	4.85	5.95	7.3
1.04153	1.69433	2.23378	3.2	4.65	5.9	7.4
1.26356	2.03175	2.80407	3.9	5.8	7.55	9.55
1.34725	2.20784	3.08238	4.45	6.3	7.6	9.7
1.29965	2.16903	3.10167	4.35	6.15	7.15	8.95
1.35793	2.16705	2.96914	4.1	5.95	6.85	8.35
1.31615	2.16607	2.8929	4	5.95	6.95	8.6
1.34477	2.38945	3.47122	4.5	6.75	8.4	10.05
1.12108	1.99228	3.08812	4.15	6.15	7.65	9.05
0.900288	1.49328	2.28935	3.3	4.75	6.05	7.95
1.01774	1.81264	2.61839	3.7	5.4	7.1	9.35
1.07569	2.03098	2.93124	3.9	5.9	7.6	9.75
1.24177	2.19551	3.11922	4.15	6.15	7.45	9.45
1.22973	1.99971	2.87883	4	5.7	6.8	8.4
1.34087	2.04759	2.8772	3.8	5.3	6.55	8.1
1.47785	2.39523	3.27001	4.35	6.05	7.15	8.8
1.3903	2.37776	3.34401	4.55	6.45	7.75	9.7
1.39555	2.30445	3.33053	4.55	6.5	8.45	10.65
1.3495	2.28583	3.34132	4.7	6.65	8.6	10.75
1.41608	2.36668	3.42873	4.75	6.7	8.25	10.25
1.48085	2.37892	3.44507	4.7	6.95	8.25	10.1
1.48021	2.31162	3.32706	4.7	7.2	8.4	10.2
1.28017	2.12661	2.95954	4.3	6.4	7.5	9.2
1.27645	2.1961	3.08558	4.3	6.1	7.45	9.1
1.31332	2.09245	3.15319	4.2	6.15	7.95	9.55
1.26819	2.07168	3.19273	4.35	6.6	8.5	10.65
1.46597	2.45828	3.52163	4.85	7	8.7	10.8
1.37057	2.41018	3.39706	4.55	6.45	7.95	9.5
1.23101	2.24456	3.18237	4.15	6	7.4	8.9
1.33343	2.38198	3.34595	4.35	6.3	7.5	9.25
1.38112	2.38436	3.44168	4.55	6.4	7.6	9.65
1.26996	2.16679	3.05904	4.1	5.65	7.1	8.75
1.18737	2.07168	2.9742	4.05	5.95	7.5	8.8
1.31317	2.22255	3.13753	4.3	6.5	7.85	9.6
1.24757	2.08744	2.81815	4	5.9	7.15	9.25
0.955728	1.65471	2.32478	3.35	4.85	6	8.05
1.03186	1.7455	2.43817	3.45	5.1	5.9	8.05
1.22312	1.93553	2.70551	3.8	5.75	6.8	8.95
1.23861	1.92277	2.76657	3.9	5.85	7.15	9
1.33287	2.11631	2.98248	4.1	5.9	7	8.65
1.33726	2.26619	3.15194	4.15	5.8	6.85	8.4
1.07172	1.93399	2.71571	3.55	5.2	6.25	7.6
0.906337	1.58341	2.31215	3.15	4.6	5.4	6.65
1.08636	1.76786	2.57842	3.5	4.95	5.95	7.45
1.17231	1.94808	2.73303	3.55	5.1	6.35	7.85
1.2425	2.05237	2.83707	3.8	5.3	6.3	7.5
1.47063	2.35732	3.23417	4.2	5.9	6.95	8.1
1.44159	2.33752	3.14373	3.95	5.85	7.2	8.85
1.40461	2.33205	3.15201	4.05	6	7.55	9.05
1.37702	2.35941	3.35953	4.5	6.4	7.85	9.2
1.26935	2.27145	3.30702	4.5	6.45	7.65	9.6
1.3972	2.43326	3.50488	4.65	7.05	8.6	10.65
1.53719	2.59245	3.80153	5.1	7.5	9.45	11.6
1.70345	2.78975	4.05101	5.2	7.2	9.05	11.1
1.78123	2.88563	4.07659	5.1	7.2	8.6	10.05
1.63817	2.68089	3.73433	4.85	6.95	8	9.4
1.33941	2.21383	3.07762	4.15	5.95	7.2	9
1.15939	1.94435	2.73916	3.8	5.35	6.65	8.45
1.31806	2.1988	3.14963	4.3	6.05	7.2	8.5
1.1524	2.00304	2.99371	4.05	6	7.25	8.1
1.22665	2.11619	3.12257	4.15	6.15	7.8	9.2
1.39802	2.39567	3.49803	4.8	6.9	8.6	10.6
1.24049	2.13062	3.08226	4.4	6	7.6	9.4
1.45233	2.32216	3.16985	4.35	5.7	7.2	8.95
1.59442	2.44992	3.37958	4.45	6.25	7.7	9.3
1.47785	2.38202	3.3949	4.35	6.45	7.85	9.85
1.5678	2.70808	3.62876	4.65	6.55	7.8	10.3
1.59303	2.80643	3.83105	5	6.75	8.2	9.8
1.51846	2.61621	3.76986	4.9	6.95	8	9.05
1.29212	2.2067	3.16151	4.2	6.15	7.15	8.3
1.09235	1.92247	2.70664	3.7	5.1	6.65	7.8
1.10418	1.86245	2.54636	3.35	5	6.45	7.95
1.15378	1.91707	2.69954	3.6	5.55	7.05	8.75
1.30901	2.25338	3.20274	4.15	5.95	7.5	8.65
1.24243	2.09053	2.97491	3.8	5.55	6.8	7.5
0.996594	1.61683	2.3652	3.3	4.85	5.8	6.65
1.06926	1.72696	2.48001	3.45	4.95	6.05	7.6
1.18957	1.96999	2.76735	3.8	5.25	6.45	8.2
1.02112	1.70037	2.40429	3.35	4.5	5.8	7.45
1.02237	1.72127	2.43885	3.4	4.65	6.15	7.9
1.09912	1.89957	2.76281	3.7	5.15	6.4	8
0.987175	1.74425	2.57451	3.45	4.65	5.8	7.3
1.1486	2.00567	2.77981	3.75	5.3	6.35	7.2
1.35602	2.2478	2.97667	3.8	5.65	6.9	7.65
1.30307	2.0768	2.77669	3.55	5.05	6.25	7.6
1.18114	1.93558	2.73804	3.7	5.3	6.15	8.15
1.20292	2.01218	2.90522	4.05	6.1	7.2	8.85
1.43459	2.32289	3.16258	4.3	6.2	8.05	9.15
1.59211	2.64576	3.55558	4.75	6.55	8.6	10.85
1.63051	2.76368	3.87145	5.2	7.2	8.75	10.95
1.5755	2.63084	3.72233	4.95	6.9	8.35	10.1
1.42261	2.32029	3.29765	4.35	6.3	7.85	9.65
1.31503	2.10787	3.05682	4.15	6.05	7.45	9.35
1.28803	2.13738	3.10338	4.4	6.35	7.4	9.5
1.15107	1.98123	3.01274	4.35	6.45	7.75	9.6
1.08382	1.77422	2.64478	3.7	5.5	6.75	8.6
1.10813	1.71636	2.33627	3.25	4.6	5.6	7.05
1.15441	1.89995	2.63972	3.7	5.2	6.4	7.5
1.34149	2.3085	3.31026	4.35	6.35	7.85	9.1
1.41818	2.36962	3.28769	4.25	6.2	7.9	9.05
1.24964	1.98398	2.61772	3.55	5.2	6.45	7.4
1.17734	1.92789	2.61324	3.6	5.45	6.35	7.4
1.16532	2.06057	2.87794	3.95	5.95	6.85	7.8
1.11025	1.89116	2.63506	3.55	5.5	6.6	8.05
1.25589	2.07287	2.96101	4.1	6	7.55	9.4
1.38272	2.30269	3.22455	4.5	6.55	8.2	10.1
1.52355	2.49289	3.46695	4.6	6.75	8.45	9.8
1.35127	2.31844	3.42187	4.65	6.45	8.15	8.95
1.10195	1.88142	2.79903	3.95	5.4	6.65	8.05
1.10192	1.92295	2.7196	3.7	5.2	6.2	8.1
1.25973	2.22234	3.0529	4	5.55	6.35	8
1.42267	2.35757	3.25986	4.25	5.85	6.9	8.4
1.26977	2.04607	2.90745	4	5.65	7.15	9.1
1.18059	1.89689	2.61655	3.9	5.6	7.05	9.2
1.11329	1.81414	2.48909	3.8	5.65	6.95	8.85
1.07137	1.71062	2.37833	3.4	5.15	6.3	7.8
1.04339	1.64985	2.24731	3.2	4.7	5.9	7.4
1.06151	1.6333	2.32774	3.55	5.05	6.35	8.45
1.11296	1.74853	2.60602	3.85	5.45	6.8	9.2
1.32216	2.3347	3.24326	4.45	6.25	7.7	9.6
1.51206	2.65936	3.58393	4.8	6.8	8.25	9.9
1.37266	2.21788	3.17955	4.35	6.1	7.5	9.45
1.32147	2.19493	3.17377	4.5	6.3	7.9	9.9
1.48676	2.45553	3.3754	4.75	6.65	8.15	10.25
1.67773	2.6435	3.49399	4.65	6.75	8.15	10.05
1.69273	2.74385	3.56216	4.45	6.6	8.05	9.3
1.3102	2.21931	2.9818	3.7	5.35	6.6	7.7
1.10518	1.85765	2.62068	3.45	5.1	6.45	7.8
1.34357	2.25383	3.1367	4.25	6.15	7.65	8.9
1.55419	2.46739	3.50424	4.8	6.8	8.25	9.45
1.60124	2.39593	3.5466	4.85	6.85	8.25	9.8
1.63054	2.61197	3.66595	4.9	7.25	9	10.6
1.42126	2.46422	3.36366	4.4	6.75	8.9	10.7
1.24025	2.20094	3.26467	4.25	6.35	8.25	10
1.33122	2.23479	3.28115	4.3	6.15	7.45	8.7
1.50976	2.47238	3.30829	4.3	6.25	7.15	8.2
1.56928	2.56513	3.4445	4.6	6.65	7.65	8.85
1.39171	2.19239	3.18802	4.35	5.95	7.1	8.2
1.38437	2.24131	3.25149	4.2	5.95	7.05	8.05
1.33734	2.33331	3.25851	4.2	5.9	7.1	8.3
1.09514	1.88256	2.66892	3.6	5	6.5	7.85
0.994581	1.611	2.3719	3.2	4.75	6	7.45
1.11597	1.86578	2.6633	3.6	5.45	6.25	7.9
1.26978	2.18166	2.95577	4.15	6.1	7.4	9.55
1.39772	2.29928	3.35354	4.7	6.85	8.25	10.45
1.39179	2.26028	3.43861	4.7	6.9	8.1	9.45
1.19535	1.99326	2.96718	4	5.55	6.95	8.1
0.981848	1.65462	2.39352	3.2	4.35	5.65	7.65
1.06199	1.98448	2.6165	3.45	5	6.3	9.1
1.2614	2.26073	3.08459	4.15	6.15	7.5	9.8
1.29371	2.21696	3.18364	4.45	6.45	8	9.6
1.30949	2.22552	3.08567	4.3	6.3	7.55	8.85
1.14579	1.83326	2.5705	3.55	5.35	6.1	7.4
0.980689	1.53637	2.19498	3.1	4.65	5.45	7
0.930626	1.44854	2.04904	2.9	4.5	5.65	7.3
1.03054	1.66835	2.49684	3.45	5.35	6.5	7.9
1.10576	1.85126	2.8439	3.9	6.25	7.2	8.35
0.961301	1.60621	2.42981	3.4	5.3	6.4	7.95
0.788828	1.3164	1.9495	2.8	4.15	5.35	6.95
0.6734	1.16871	1.74485	2.55	3.95	5.05	6.7
0.971233	1.60226	2.29665	3.2	4.95	5.95	7.6
1.21402	1.94154	2.74916	3.65	5.55	6.75	8.4
1.28318	2.08964	2.97342	4	5.95	7.3	9.1
1.31037	2.13322	2.9854	4.1	6.15	7.5	9.3
1.15909	1.89041	2.6999	3.7	5.5	6.75	8.3
0.988368	1.62768	2.3571	3.35	4.85	5.75	7.25
0.977685	1.55365	2.07957	3	4.3	5.2	6.65
1.05098	1.6553	2.19111	3.2	4.55	5.55	6.65
0.94647	1.57803	2.24465	3.3	4.7	5.7	6.8
0.976549	1.63676	2.51748	3.55	5.25	6.55	7.85
0.975178	1.67857	2.6055	3.65	5.35	6.6	8.8
0.96055	1.71015	2.49042	3.5	4.95	6.1	8.5
0.881701	1.47328	2.12071	3	4.45	5.7	7.55
0.734259	1.19991	1.69273	2.4	3.85	5.2	6.95
0.796165	1.34994	1.91154	2.85	4.4	5.55	6.9
0.942457	1.56141	2.25584	3.35	5.05	5.8	7.15
1.00788	1.67905	2.40247	3.4	5.2	6.05	7.55
1.09859	1.92449	2.78117	3.8	5.7	6.5	7.6
1.05135	1.79426	2.58653	3.65	5.3	6	6.6
0.887438	1.53796	2.17169	3.1	4.45	5.5	6.5
0.990496	1.66675	2.31818	3.25	4.7	5.9	7.1
1.02395	1.65579	2.37824	3.5	5.15	6.15	7.15
1.17858	2.01383	2.93104	4.15	6.05	7.15	8.3
1.43988	2.31037	3.26631	4.45	6.55	7.8	9
1.42569	2.07485	2.82836	3.95	5.85	6.85	8.25
1.12035	1.71541	2.30544	3.4	4.95	5.75	7.1
0.879024	1.45336	2.03405	3.05	4.65	5.4	6.9
0.979781	1.6824	2.36289	3.3	5.05	5.8	7.45
1.00772	1.78221	2.52084	3.45	5	6	7.7
0.924111	1.55141	2.23024	3.2	4.5	5.8	7.2
0.929972	1.53921	2.0953	3.1	4.35	5.3	6.15
0.891027	1.55427	2.07698	2.9	4	4.8	5.65
0.817374	1.44778	1.96047	2.6	3.65	4.55	5.7
0.894129	1.4554	2.09057	2.95	4.5	5.4	6.8
0.98536	1.68541	2.48683	3.5	5.4	6.5	7.7
1.02258	1.80792	2.63618	3.7	5.75	6.85	7.85
1.11204	1.81636	2.63374	3.8	5.9	7	8.25
1.0668	1.75704	2.49579	3.6	5.35	6.5	8.15
1.07372	1.81831	2.57705	3.6	5.25	6.4	8.2
1.25068	2.10013	2.91511	3.95	5.7	7.05	8.95
1.21292	2.08705	2.97777	3.9	5.6	7.15	9.15
1.22596	2.21085	3.48427	4.45	6.4	7.85	9.5
1.272	2.29479	3.56856	4.65	6.65	8.15	9.7
1.23779	2.16698	3.14401	4.1	6.05	7.6	9.2
1.19563	2.03818	3.12874	4.05	6.1	7.3	9.15
1.08229	1.79504	2.79791	3.85	5.45	6.5	8.4
1.02933	1.70227	2.54524	3.55	4.95	6.2	8.1
1.05078	1.71937	2.52968	3.4	4.95	6.25	8.15
1.2123	1.85153	2.82745	3.8	5.3	6.2	7.7
1.30245	1.97165	2.92606	4	5.55	6.45	7.8
1.25076	2.00263	2.78079	3.85	5.55	6.75	8.4
1.32515	2.21058	3.2812	4.5	6.25	7.55	9.5
1.35053	2.30267	3.47892	4.85	6.75	8.1	9.6
1.41223	2.28147	3.34666	4.55	6.65	7.8	9.1
1.43275	2.28588	3.42753	4.55	6.55	7.75	9.25
1.30133	2.1059	3.07791	4.2	6	7.3	8.65
1.38901	2.17739	3.07047	4.15	5.95	7.15	8.4
1.55133	2.43767	3.52693	4.75	6.95	8.4	9.8
1.36756	2.25975	3.28538	4.6	6.85	8.4	10.05
1.05871	1.82497	2.70986	3.85	5.5	6.85	8.7
0.977996	1.67589	2.51689	3.55	5.1	6.45	7.85
1.13431	1.81692	2.66762	3.85	5.45	6.6	7.8
1.09448	1.76043	2.50285	3.75	5.3	6.75	8.55
0.919156	1.664	2.55392	3.7	5.3	7	9.45
1.0325	1.78925	2.79371	3.95	5.6	6.95	9.55
1.16237	1.99892	2.96786	4.2	5.9	7.3	9.65
1.32555	2.32872	3.3571	4.6	6.25	7.7	9.7
1.2654	2.26039	3.22215	4.4	6.25	7.6	9.35
1.18375	2.03841	3.0687	4.1	6.15	7.65	9.7
1.42064	2.2353	3.32002	4.45	6.55	8.1	10.3
1.36937	2.14714	3.14745	4.45	6.55	7.8	9.4
1.01736	1.67014	2.51261	3.65	5.4	6.3	7.35
0.795528	1.38096	2.08456	2.9	4.3	5.05	6.25
0.775712	1.27129	1.90273	2.55	3.7	4.65	6.15
0.82836	1.34905	1.87608	2.55	3.65	4.7	6.45
0.92079	1.65214	2.27043	3.1	4.7	6.1	7.7
1.17036	2.14082	3.02269	4.05	6.15	7.35	8.75
1.16991	2.02924	2.8939	3.9	5.75	6.4	8.1
1.16445	1.81015	2.56679	3.6	5.05	5.8	7.75
1.16448	1.84907	2.58958	3.6	5.05	6.1	7.85
0.913524	1.63248	2.30348	3.15	4.6	5.95	7.5
0.873551	1.65791	2.4097	3.35	5.05	6.4	8.2
1.18967	2.03032	2.9913	4.1	6.15	7.05	8.65
1.31283	2.24723	3.38431	4.65	6.65	7.55	8.65
1.13985	2.11975	3.13802	4.35	6.1	7.4	8.25
1.11485	1.94133	2.89335	3.95	5.55	6.75	7.5
1.00238	1.68311	2.49866	3.35	4.5	5.55	6.4
0.856841	1.51335	2.16311	2.95	4.25	5.3	6.05
0.975332	1.70822	2.47278	3.45	5.4	6.45	7.05
1.2218	1.98109	2.73954	3.8	5.8	7.1	8.15
1.35948	2.04489	2.78823	3.9	5.9	7.2	8.6
1.23957	2.00491	2.90385	4.05	5.65	6.95	8.6
1.09983	1.83577	2.86974	4	5.4	6.8	8.5
1.24276	2.06245	3.12823	4.2	6	7.1	8.45
1.24295	2.12639	3.01753	4.1	5.95	7.25	8.45
1.00503	1.70236	2.42181	3.45	5.2	6.65	8.25
1.06195	1.82621	2.62987	3.8	5.75	7.1	8.85
1.37732	2.23697	3.1679	4.55	6.5	7.7	9.45
1.46363	2.38843	3.35031	4.65	6.45	7.6	9.4
1.30049	2.23204	3.06856	4.25	6.1	7.3	8.95
1.27073	2.20969	3.05858	4.35	6.15	7.4	8.75
1.53907	2.55428	3.4551	4.85	6.7	8.05	9.15
1.58966	2.48246	3.28161	4.55	6.55	7.65	8.65
1.22709	1.99552	2.78382	3.85	6	7.25	8.25
1.09119	1.96513	2.85455	3.9	6	7.8	9.3
1.17453	1.99674	2.82647	3.9	5.9	7.35	8.9
1.1659	1.8283	2.54143	3.6	5.45	6.6	7.85
1.20838	1.93371	2.65597	3.65	5.45	6.85	7.85
1.03737	1.71873	2.41728	3.2	4.7	5.8	7
0.792568	1.31543	1.89851	2.6	3.65	4.7	6.15
1.09038	1.78669	2.33509	3.2	4.5	5.8	7.05
1.28639	2.18403	2.8715	4	5.55	6.85	7.8
1.17327	2.03185	2.70934	3.85	5.55	6.5	7.4
1.1027	1.92421	2.52128	3.5	5.1	5.95	7.2
1.00061	1.7734	2.41337	3.4	4.8	6.05	7.55
1.12367	1.90179	2.67557	4	5.75	6.8	8.6
1.2697	2.10921	2.97108	4.4	6.3	7.25	8.85
1.10609	1.80003	2.62399	3.8	5.75	7.15	8.5
0.972462	1.59999	2.51103	3.65	5.65	6.9	8.6
1.05199	1.72963	2.59669	3.65	5.4	6.55	8.15
1.21481	1.97068	2.70354	3.6	5.25	6.3	7.45
1.20555	2.06619	2.84815	3.85	5.55	6.55	7.95
1.25816	2.07195	2.84602	4	5.7	6.85	8.35
1.26105	2.03328	2.80828	3.95	5.75	6.6	8.1
1.22372	2.01317	2.87273	4	6	6.9	8.5
1.15028	1.89214	2.74063	3.75	5.65	6.5	8.1
1.13989	1.87007	2.69713	3.65	5.3	6.1	7.6
1.29744	2.03407	2.8012	3.8	5.55	6.8	8.1
1.23929	2.0163	3.002	3.95	5.85	7.3	8.65
1.0416	1.73405	2.61369	3.5	4.9	6.3	8.3
0.933718	1.54978	2.1793	3.15	4.55	5.75	7.85
1.2196	2.00106	2.75459	3.8	5.6	6.45	8.1
1.40723	2.17623	2.99149	4.05	5.8	6.5	8
1.17492	1.77189	2.48793	3.5	4.85	5.75	6.9
0.878366	1.36488	2.01947	2.9	4.1	5.25	6.6
0.997788	1.60721	2.59115	3.6	5.5	6.7	8.7
1.23734	1.99313	3.03375	4.25	6.55	7.7	9.85
1.36239	2.13357	3.08901	4.35	6.65	7.65	8.9
1.27056	1.97218	2.80823	3.9	6.15	7.45	8.55
1.21939	1.97584	2.71291	3.85	5.95	7.35	9.1
1.24518	2.04125	2.82419	4.05	6.1	7.35	8.95
1.1346	1.86822	2.52238	3.65	5.6	6.8	8.45
1.18318	2.08797	2.90939	4.15	5.9	7.35	9.2
1.26857	2.19178	3.26306	4.6	6.4	8.25	9.9
1.23037	2.06734	3.13674	4.4	6.15	7.75	9.5
1.19537	2.12217	3.17733	4.4	6.25	7.55	9.5
1.20789	2.17214	3.13639	4.35	6.4	7.7	9.5
1.04237	1.84348	2.63914	3.7	5.35	6.65	7.9
1.0313	1.78784	2.62325	3.6	5.35	6.8	7.95
1.19696	1.993	2.93133	4.15	6.1	7.6	9.05
1.05835	1.659	2.3936	3.6	5.35	6.55	8.55
1.06869	1.70946	2.4414	3.6	5.4	6.65	8.65
1.23244	2.05456	3.02592	4.15	6.15	7.55	9.25
1.28875	2.09082	3.1144	4.2	6.2	7.45	9.15
1.2223	1.91974	2.8008	3.85	5.75	6.8	8.2
1.00412	1.62277	2.23325	3.1	4.65	5.75	7.4
1.08219	1.91338	2.58706	3.65	5.1	6.35	7.95
1.19991	2.07445	2.8452	3.95	5.8	7	8.5
1.15825	1.88193	2.60368	3.55	5.5	6.95	8.9
1.12303	1.90943	2.72104	3.8	5.55	7.2	9
1.18909	1.95514	2.78839	4.05	5.8	7	8.45
1.11734	1.80746	2.54236	3.7	5.25	6.3	7.55
1.11107	1.87768	2.68673	3.75	5.45	6.65	8
1.1479	1.96638	2.89495	4	6.15	7.35	8.8
1.03889	1.90282	2.78811	3.95	5.7	6.85	8.15
1.07696	1.85521	2.7045	3.75	5.15	6.2	7.6
0.976745	1.50231	2.31416	3.15	4.55	5.4	6.8
0.874789	1.41311	2.25064	3.25	4.65	5.3	6.65
0.979544	1.70533	2.64108	3.9	5.15	6	7.2
1.12139	1.93457	2.87523	4.15	5.65	6.9	8.25
1.16768	1.97472	2.87571	4.1	6.05	7	8.5
1.24215	2.03509	3.03776	4.3	6.25	7	8.35
1.38744	2.29186	3.44306	4.7	6.7	8.35	10.1
1.49107	2.47867	3.80092	5.15	7.15	8.85	11
1.38548	2.30809	3.64467	5	7	8.25	10.25
1.34427	2.26962	3.48775	4.7	7.05	8.35	10.25
1.4667	2.53443	3.69358	5.05	7.3	8.5	10.85
1.33633	2.36664	3.38866	4.85	6.85	8.35	10.95
1.20251	2.14375	3.08107	4.3	6.7	8.55	10.8
1.04134	1.82786	2.67261	3.65	5.8	7.5	9.7
0.888598	1.52939	2.3113	3.25	4.75	6.05	8.25
0.946774	1.65455	2.51304	3.45	5.15	6.4	8.25
0.971182	1.60824	2.38024	3.35	5.1	6.25	7.8
0.903786	1.4832	2.17053	3.15	4.55	5.5	6.95
1.01603	1.69865	2.50426	3.55	5.15	6.1	7.55
1.27016	2.18536	3.10207	4.35	6.35	7.55	9.1
1.59817	2.71482	3.80173	5.2	7.25	8.85	10.35
1.53878	2.47517	3.59048	4.75	6.6	8.1	9.5
1.10521	1.7743	2.61454	3.5	5.1	6.4	7.9
0.98732	1.67039	2.37223	3.4	5.1	6.3	7.8
1.18255	1.94037	2.74566	3.95	5.65	6.7	8.45
1.23895	1.98737	2.90654	4.1	5.7	6.8	8.35
1.11822	1.8378	2.69159	3.8	5.5	6.6	8.2
1.12876	1.88764	2.67203	3.7	5.5	6.7	8.4
1.14753	1.8613	2.64071	3.6	5.4	6.85	8.1
1.16085	1.82412	2.61852	3.65	5.2	6.45	7.85
1.38575	2.20634	3.11458	4.5	6.1	7.15	8.45
1.39067	2.19056	3.27496	4.65	6.35	7.45	9.05
1.25241	2.02351	3.02237	4.15	5.75	6.85	8.85
1.31885	2.17968	2.98501	4.25	6.15	7.2	8.85
1.09076	1.76133	2.45632	3.5	5.7	6.8	8.3
1.33948	2.14054	3.06501	4.1	6.3	7.8	9.85
1.58716	2.62497	3.73587	5	6.95	8.75	11.5
1.44548	2.41735	3.53222	4.85	6.5	8.2	10.55
1.30449	2.14594	3.11228	4.4	6.2	7.75	10.05
1.29893	2.07864	2.89473	4.1	6.2	8.1	10.65
1.47435	2.4771	3.43527	4.65	6.8	8.65	10.9
1.59419	2.79642	3.83394	5	7.15	8.55	10.65
1.58855	2.6969	3.66261	4.95	7.1	8.4	10.5
1.39642	2.25812	3.13086	4.4	6.45	7.5	10.05
1.51903	2.39061	3.39865	4.6	6.8	8	10.55
1.48927	2.40133	3.51507	4.6	6.9	8.65	10.45
1.40115	2.33357	3.43869	4.4	6.55	7.95	9.35
1.30255	2.17204	3.10115	3.9	5.9	7.15	9.15
1.33015	2.16276	3.00669	3.85	5.85	7.3	9.35
1.31459	2.20623	3.1476	4.05	6	7.15	8.85
1.2111	2.14102	3.20233	4.3	6.1	7.25	8.95
1.45282	2.48307	3.6032	4.9	6.85	8.2	9.8
1.70028	2.764	3.74448	4.85	6.8	8	9.75
1.54959	2.51587	3.38356	4.55	6.45	7.6	9.55
1.39928	2.29516	3.23119	4.4	6.3	7.5	9.6
1.36894	2.28199	3.34128	4.4	6.3	7.6	9.55
1.09444	1.86412	2.78188	3.85	5.7	7.4	9.15
0.904444	1.61458	2.34824	3.35	5.05	6.7	8.35
0.998878	1.75954	2.57172	3.55	5.45	6.95	8.55
1.23556	2.04427	3.02363	4.2	6.2	7.55	8.5
1.38495	2.16296	3.21608	4.4	6.25	7.55	8.15
1.32461	2.2126	3.16824	4.2	5.9	7.35	8.3
1.20321	2.0702	2.90961	3.9	5.3	7	8.3
1.32523	2.17451	3.1022	4.3	6.05	7.7	9.25
1.17656	2.0387	2.93239	4	5.8	7.2	8.8
1.01521	1.77655	2.44732	3.15	4.65	6.15	8.05
1.21543	1.97219	2.67521	3.5	5.05	6.6	8.35
1.21024	1.94076	2.73947	3.8	5.4	6.8	8.65
1.16537	1.90804	2.67572	3.8	5.55	7	8.95
1.23476	2.09231	2.78107	3.85	5.4	6.55	8.45
1.09681	2.09864	2.95804	4.1	5.75	7	9
1.3706	2.53919	3.70824	5	6.8	8.85	10.5
1.65214	2.7971	4.1313	5.35	7.05	9.1	10.5
1.4148	2.24262	3.40741	4.55	6.15	7.65	8.75
1.3078	2.00662	2.81223	3.9	5.5	6.9	8.2
1.25216	2.01262	2.71652	3.85	5.35	6.6	8.45
1.07289	1.83758	2.63066	3.75	5.4	6.45	8.45
1.16443	2.0054	2.91821	4.1	5.9	6.95	8.65
1.36926	2.30448	3.27721	4.6	6.3	7.35	8.75
1.26284	2.10892	2.95258	4.25	5.6	6.9	8.75
1.19342	2.09396	2.96199	4.25	5.7	7.05	8.6
1.10177	1.89521	2.68205	3.8	5.5	6.9	8.2
1.16624	1.81909	2.50775	3.55	5.15	6.8	8.75
1.37782	2.13521	3.00142	4	5.75	7.15	9.05
1.35026	2.15633	3.00801	3.95	5.85	7	8.7
1.3848	2.31543	3.35841	4.5	6.6	7.9	9.7
1.55554	2.51871	3.71717	5.1	7.2	8.35	10.55
1.45175	2.27999	3.21525	4.6	6.8	8.1	10.1
1.25372	2.04188	2.88578	4.2	6.45	8.1	9.8
1.29917	2.0756	2.9375	4.15	6.1	7.75	9.8
1.30925	2.06895	2.92372	4.05	5.7	7.45	9.15
1.27402	2.03708	2.97573	4.15	5.85	7.7	8.7
1.26734	2.00582	2.89984	4.1	5.85	7.25	8.05
1.0742	1.76739	2.51179	3.65	5.05	5.7	7
0.951175	1.62887	2.3405	3.4	4.6	5.25	7.15
1.24785	2.11424	3.03117	4.2	5.8	6.75	8.45
1.3763	2.22121	3.13076	4.4	6.25	7.45	8.85
1.10743	1.82277	2.54818	3.6	5.45	6.45	8.25
1.12825	2.00201	2.78258	3.65	5.65	6.55	8.3
1.23955	2.16297	3.02518	4.05	6	7.35	8.85
1.09813	1.87884	2.69416	3.8	5.25	6.6	8.35
0.966011	1.61581	2.40667	3.3	4.75	6	7.45
1.11253	1.79934	2.77857	3.65	5.5	7.1	8.4
1.39869	2.23166	3.27116	4.4	6.3	7.6	8.9
1.46092	2.43262	3.31608	4.45	6.2	6.95	8.25
1.35512	2.30078	3.21028	4.2	5.95	6.7	7.95
1.11535	1.87128	2.67039	3.65	5.25	6.25	7.7
0.992997	1.80815	2.58808	3.6	4.9	6.2	7.8
0.952462	1.70679	2.48574	3.45	4.7	5.65	7.05
0.876927	1.45309	2.10801	2.95	4.4	5.15	6.5
0.915343	1.64594	2.46701	3.5	4.9	5.8	6.85
0.932982	1.61214	2.47651	3.6	4.75	5.8	6.95
1.03095	1.7184	2.5276	3.6	5.2	6.35	7.6
1.27917	2.06518	2.90843	4.05	5.8	7	8.05
1.23806	1.92866	2.82676	3.95	5.65	6.5	7.8
0.995357	1.60879	2.35604	3.4	5.05	5.55	7
0.840345	1.41543	2.02821	2.85	4.25	5.1	6.1
0.872107	1.55889	2.35755	3.2	4.95	6.2	7.15
1.06745	1.75558	2.5452	3.6	5.35	6.4	7.55
0.995657	1.58518	2.20167	3.2	4.55	5.3	6.5
0.861418	1.50114	2.16014	3.15	4.35	5.15	6.55
0.879797	1.61723	2.31864	3.45	4.5	5.7	7
0.961934	1.64159	2.32976	3.35	4.6	5.85	6.55
0.818331	1.26914	1.78276	2.6	4	4.75	5.95
0.807171	1.34093	1.93779	2.85	4.5	5.2	6.85
0.983252	1.70824	2.4927	3.6	5.3	6.1	7.6
0.905232	1.57984	2.19408	3.25	4.75	5.4	6.85
0.871369	1.56763	2.09149	3.2	4.7	5.65	6.7
0.881779	1.54536	2.09911	3.25	4.7	5.95	7.15
0.862072	1.49355	2.03002	2.9	4.4	5.4	6.75
0.821836	1.42339	1.95361	2.7	4.15	4.9	6.6
0.827112	1.3749	2.07591	2.95	4.3	5.25	7.25
1.03301	1.69311	2.51609	3.6	5.25	6.35	8
1.19661	1.80288	2.7157	4	5.85	6.6	7.85
1.07952	1.61131	2.48045	3.65	5.15	5.9	7.35
1.02847	1.66117	2.35254	3.4	4.75	5.8	7.4
1.13085	1.82121	2.59868	3.7	5.3	6.45	7.65
1.14359	1.87696	2.74615	3.75	5.4	6.6	8.35
1.096	1.92519	2.87729	3.75	5.4	6.7	8.6
1.23626	2.16106	3.15605	4.2	5.95	7.35	8.65
1.33548	2.25535	3.06544	4.15	5.75	7.1	8.4
1.18972	2.07854	2.93654	3.95	5.35	6.6	7.55
0.959718	1.65708	2.43949	3.45	4.7	5.75	6.6
0.839308	1.34297	1.79198	2.7	3.9	5.1	6.5
1.11296	1.70169	2.23902	3.3	4.8	6.1	7.85
1.42167	2.24781	3.07956	4.45	6.55	7.6	9.05
1.35491	2.32533	3.42287	4.9	7.05	8.25	9.8
1.215	2.22911	3.34617	4.55	6.6	8.3	10.3
1.20149	2.2322	3.25549	4.4	6.4	8	9.5
1.12255	2.07562	3.04002	4.2	5.85	7	8.2
1.14941	1.94542	2.73238	3.7	5.15	6.3	7.5
1.00479	1.64452	2.35733	3.2	4.5	5.75	7.35
0.77536	1.39507	2.1273	2.9	4.3	5.45	7.75
1.03751	1.66305	2.39511	3.25	4.9	6.1	7.75
1.0691	1.6338	2.26885	3.15	4.7	5.85	6.9
0.857683	1.34129	1.87742	2.7	3.95	4.85	6.3
0.857483	1.27674	1.89675	2.8	4.05	5.1	7.05
1.03434	1.65199	2.3848	3.5	5.05	6.5	8.2
1.05577	1.753	2.43799	3.55	5	6.4	7.9
0.978878	1.62538	2.29304	3.4	4.8	5.85	7.5
0.920167	1.62039	2.34264	3.45	4.95	6.25	7.55
0.904491	1.5689	2.33973	3.4	4.8	5.8	7.2
0.930456	1.57087	2.36884	3.45	5.05	6.05	7.95
0.911732	1.50317	2.24231	3.25	4.8	6.15	8.05
1.1412	1.79426	2.65493	3.75	5.4	6.7	7.95
1.15046	1.8613	2.87394	4.15	6.15	7.45	8.4
0.961522	1.65859	2.58442	3.75	5.55	6.7	8.35
0.974784	1.75958	2.64855	3.6	5.5	6.85	9
1.26492	2.21223	3.16431	4.2	6.25	7.7	9.6
1.3644	2.31209	3.28148	4.35	6.4	7.8	9.5
1.1817	2.02268	3.07611	4.1	6.35	7.85	9.6
1.35286	2.22925	3.42334	4.5	6.75	8.35	9.8
1.35144	2.23178	3.23275	4.35	6.25	7.7	8.85
1.15683	2.12685	2.92151	4.1	5.75	6.9	8.1
1.23367	2.21338	2.97744	4.15	5.8	7.2	8.4
1.14903	1.97956	2.63728	3.65	5.2	6.65	8
0.971467	1.72014	2.39616	3.3	4.75	5.85	7.4
1.14704	1.94036	2.69712	3.75	5.4	6.4	7.7
1.33159	2.21392	3.13468	4.3	6.3	7.55	8.95
1.5255	2.55579	3.64953	4.8	6.65	8.3	9.85
1.68392	2.75304	3.71002	4.8	6.55	8.1	9.8
1.37102	2.21226	3.01517	4.05	5.7	6.9	8.75
1.05563	1.69922	2.57859	3.45	4.8	5.85	7.45
1.1506	1.85561	2.74374	3.7	5.3	6.35	8.1
1.24715	2.01163	2.8222	3.85	5.7	6.8	8.55
1.17343	1.95651	2.86914	3.85	5.85	7.15	8.6
1.18959	2.01579	2.9059	4.15	6.05	7.1	8.9
1.18213	1.89507	2.67858	4	5.5	6.55	8.8
1.2316	1.9916	2.78493	3.95	5.6	6.85	8.7
1.42585	2.33357	3.21781	4.2	6.15	6.95	8.35
1.42952	2.3946	3.29466	4.15	6.05	6.95	8.7
1.27179	2.21086	3.00618	3.95	5.75	6.95	8.85
1.2701	2.1597	2.99033	4.25	6.15	7.35	8.85
1.27218	2.10355	3.00924	4.35	6.2	7.2	8.5
1.12074	1.84785	2.72302	3.85	5.45	6.25	7.65
1.03066	1.78641	2.60091	3.6	5.1	6.25	8.05
1.14188	1.98857	2.69663	3.65	5.2	6.35	8.15
1.24993	2.14753	2.85778	3.85	5.45	6.8	8.65
1.30727	2.26246	3.17854	4.25	6.05	7.55	9.35
1.30446	2.18002	3.15762	4.1	5.95	7.3	8.55
1.21594	2.06033	2.87661	3.8	5.45	6.65	7.85
1.0943	1.93389	2.68966	3.7	5.45	6.55	8.4
0.979214	1.75367	2.51858	3.55	5.35	6.35	8.2
0.803185	1.40236	2.01479	2.9	4.25	5.1	6.35
0.679626	1.13285	1.74411	2.5	3.6	4.7	5.8
0.786856	1.35223	1.99137	2.8	3.85	4.7	6.05
1.03166	1.70067	2.31663	3.3	4.55	5.45	7.4
1.29947	2.03686	2.92951	4.15	6.1	7	8.65
1.33202	2.15428	3.20427	4.35	6.4	7.6	8.7
1.43785	2.51309	3.63725	4.65	6.65	8.35	9.45
1.39824	2.46165	3.50826	4.5	6.5	8	9.4
1.11131	1.80233	2.52935	3.45	5.05	6.4	8.15
1.02621	1.57309	2.22749	3.1	4.4	5.55	6.85
1.00787	1.64702	2.40503	3.35	4.55	5.75	7.05
1.21461	2.04397	2.83379	4	5.3	6.55	8
1.25481	2.10142	2.85247	3.95	5.4	6.6	7.95
0.964364	1.6763	2.49597	3.45	5.05	6.1	7.45
0.805733	1.40661	2.18522	3.25	4.75	5.7	7.1
0.866368	1.55109	2.2948	3.35	4.75	5.6	6.95
0.97994	1.72761	2.43964	3.5	4.9	5.8	7.2
1.03684	1.75671	2.53613	3.6	5.1	6.1	7.55
0.942569	1.5529	2.35465	3.3	4.85	5.95	7.25
0.913194	1.39234	1.97924	2.9	4.3	5.4	6.55
0.921569	1.44494	1.99077	2.9	4.3	5.2	6.2
0.970086	1.61306	2.30743	3.1	4.45	5.25	6.15
1.21738	2.03748	2.77349	3.5	5	6	7.05
1.27475	2.06192	2.78267	3.65	5.5	6.5	8.1
1.04298	1.67857	2.45489	3.35	5	6.1	8.2
0.871281	1.53932	2.27177	3.1	4.5	5.7	7.45
1.07899	1.80381	2.49015	3.5	5.1	6.05	7.45
1.27031	2.02164	2.75085	3.8	5.3	6.5	8.2
1.06428	1.71529	2.36995	3.25	4.55	5.75	7.65
1.01458	1.65405	2.22263	3.1	4.9	5.9	7.75
1.35011	2.2286	2.99217	3.9	6.05	6.8	8.2
1.41706	2.38616	3.3265	4.35	6.35	7.1	8.35
1.16121	1.95766	2.77474	3.85	5.55	6.6	7.85
1.07596	1.71629	2.39205	3.4	4.65	5.7	7.2
1.19355	1.96158	2.68989	3.75	5.25	6.5	8.25
1.25717	2.205	2.9816	4	5.95	7.45	9.4
1.31011	2.18792	3.00046	4.1	6.05	7.45	9.3
1.15493	1.91655	2.69907	3.7	5.45	6.75	8.3
1.02117	1.78267	2.46945	3.4	5.2	6.25	7.85
1.0581	1.75836	2.3917	3.45	5.25	6.2	7.65
1.00859	1.77018	2.54218	3.65	5.15	6.25	7.45
1.00227	1.91388	2.79623	3.85	5.25	6.25	7.65
1.00433	1.86192	2.6874	3.6	5.1	6.2	7.6
1.00155	1.6759	2.42991	3.35	4.95	6	6.95
0.991718	1.66235	2.57259	3.6	5.05	5.75	6.6
0.96721	1.56094	2.47978	3.5	4.75	5.35	6.25
0.932707	1.43642	2.13765	3.05	4.25	5.1	6.55
0.951737	1.55451	2.24813	3.2	4.65	5.7	7.7
0.990527	1.59597	2.29484	3.2	4.95	5.9	7.65
0.99853	1.57737	2.48085	3.5	5.2	6.15	7.6
0.93467	1.52284	2.42169	3.6	5.15	6.35	7.8
0.942173	1.63664	2.37615	3.5	4.9	6.15	7.95
0.964345	1.71655	2.32638	3.3	4.55	6	7.95
0.825654	1.446	1.93754	2.9	4.05	5.2	6.9
0.878636	1.52177	2.14419	3.05	4.25	4.95	6.75
0.982707	1.71147	2.41621	3.35	5.05	5.95	7.6
0.97999	1.61947	2.36047	3.55	5.3	6.2	7.35
1.04605	1.67018	2.4311	3.65	5.05	6.2	7.35
1.11546	1.81801	2.55942	3.6	5.3	6.5	7.3
1.12035	1.86782	2.65258	3.6	5.4	6.5	7.1
0.954133	1.64549	2.36716	3.25	4.6	5.55	6.7
0.813938	1.40439	2.06398	2.85	4	4.75	6.6
0.995509	1.68373	2.4224	3.45	4.95	6.15	7.95
1.10316	1.80696	2.53308	3.6	5.15	6.5	7.7
0.987176	1.57773	2.26652	3.2	4.4	5.45	6.85
1.15287	1.83051	2.59314	3.7	5.3	6.25	8.2
1.3565	2.15153	2.98474	4.25	6.35	7.65	9.5
1.20878	1.96773	2.86014	4.15	6.15	7.5	8.9
0.990003	1.62715	2.40125	3.5	5.25	6.5	8.15
0.903838	1.50039	2.10365	3	4.65	5.95	7.55
1.02361	1.71917	2.51904	3.55	5	6.2	7.8
1.24529	2.05071	3.07162	4.3	5.85	7	8.55
1.33944	2.16536	3.1424	4.3	6.1	7.2	8.55
1.10499	1.82992	2.67579	3.65	5.55	6.75	8.55
0.933785	1.62315	2.41377	3.45	5.35	6.75	8.3
1.08651	1.92663	2.76643	3.85	5.7	7.2	8.35
1.17264	2.05004	3.02841	4.15	6.05	7.5	8.65
1.09668	1.89324	2.90368	4.1	5.9	7.1	8.5
1.25664	2.08134	3.01877	4.35	6.15	7.15	9.1
1.22695	2.09404	3.00864	4.35	6.35	7.7	9.45
1.07612	1.88618	2.73093	3.95	6.1	7.45	8.9
1.12987	1.84186	2.7293	4.05	5.75	7	8.65
1.06242	1.77026	2.61912	3.7	5.3	6.6	7.95
1.02535	1.83024	2.4301	3.3	5	6.1	7.2
1.02535	1.77715	2.45984	3.5	5	6.05	7.3
1.21089	1.95817	2.91224	4.15	5.75	7.15	8.7
1.36075	2.20261	3.13443	4.3	6.1	7.85	9.3
1.42371	2.30105	3.16871	4.2	6.1	7.75	9.3
1.35554	2.15503	2.97743	4.05	5.75	7.35	8.85
1.17772	1.919	2.70006	3.75	5.3	6.6	8
1.16502	1.96587	2.82871	3.9	5.7	6.65	8.15
1.02549	1.65423	2.37744	3.45	5.15	6.4	7.75
0.93525	1.44386	1.99839	3	4.7	5.95	7.45
1.05348	1.67913	2.40311	3.35	5.1	6	7.25
1.03535	1.67177	2.51453	3.55	5.1	5.8	7.25
0.904693	1.47261	2.11765	3.15	4.5	5.55	6.95
0.806081	1.38846	1.90141	2.75	3.9	5.25	6.15
0.786706	1.29472	1.86789	2.7	4	5.2	6
0.833199	1.28582	1.89923	2.85	4.3	5.4	6.35
1.06458	1.6628	2.48117	3.5	5.05	5.85	7.25
1.20691	1.97036	2.89992	4	5.6	6	8.15
0.97417	1.74022	2.50707	3.55	5	5.85	7.9
0.930077	1.57845	2.2293	3.15	4.35	5.35	7
1.05661	1.77454	2.46471	3.45	4.85	5.9	7.6
1.18301	2.07345	2.97936	4.1	5.9	7.2	8.4
1.23142	2.04243	2.90499	4.05	5.95	6.7	7.5
1.12015	1.76813	2.51696	3.5	5.3	5.95	6.75
1.10624	1.80648	2.67865	3.65	5.3	6.45	7.1
1.00193	1.7669	2.75338	3.8	5.3	6.55	7.25
0.909361	1.58301	2.37059	3.3	4.6	5.5	6.55
1.03715	1.79575	2.5586	3.5	4.9	5.65	6.45
1.07304	1.89328	2.84854	3.9	5.3	6.2	7.15
0.957796	1.61233	2.42584	3.45	4.55	5.55	7.25
0.90687	1.55559	2.29947	3.25	4.45	5.45	7.25
1.04534	1.78764	2.54105	3.5	5.1	6.1	7.55
1.13148	1.86948	2.70991	3.75	5.55	6.55	8.15
1.06806	1.72286	2.55506	3.75	5.35	6.5	8.25
1.14203	1.93082	2.72101	3.9	5.45	6.75	8.4
1.25281	2.09132	3.02684	4.1	5.8	7.15	8.9
1.11613	1.8287	2.65942	3.6	5.25	6.75	8.75
1.03383	1.78305	2.46029	3.4	4.95	6.5	8.5
1.2057	2.08506	2.94514	4	5.6	6.95	8.6
1.17259	2.05683	3.02919	4.1	6	7.25	8.65
1.02868	1.70789	2.65597	3.7	5.45	6.65	7.9
0.912886	1.46034	2.30341	3.25	4.5	5.5	7.1
0.94164	1.53252	2.20007	3.1	4.3	5.1	6.8
1.12923	1.83185	2.61246	3.55	5.2	6.25	7.6
1.15525	1.87441	2.65252	3.65	5.4	6.8	8.15
1.15375	1.86565	2.63352	3.65	5.4	6.85	8.15
1.29024	2.10844	3.1631	4.3	6.25	7.5	8.95
1.2764	2.14851	3.23498	4.4	6.3	7.3	8.35
1.11698	2.00178	2.96699	4.05	5.75	6.65	7.65
1.07335	1.88788	2.78826	3.9	5.45	6.5	7.85
1.07093	1.78139	2.54136	3.65	5.3	6.4	7.95
1.03203	1.69376	2.44536	3.6	5.35	6.65	8.3
0.795801	1.35162	2.03685	3	4.45	5.9	7.65
0.825489	1.45592	2.13198	2.9	4.1	5.45	7.3
1.02568	1.75786	2.57794	3.6	5.25	6.6	8
0.961835	1.68699	2.43221	3.45	5	6.2	7.6
0.956498	1.6758	2.27427	3	4.05	5.3	6.45
0.927861	1.51443	2.10424	2.8	3.95	5.1	6.1
0.759224	1.1999	1.79286	2.5	3.85	4.8	6.15
0.685162	1.18057	1.82267	2.55	3.95	5.1	6.45
0.833686	1.51233	2.24916	3.2	4.5	5.6	6.5
0.944786	1.69079	2.35261	3.3	4.75	5.5	6.35
1.07092	1.84664	2.67816	3.7	5.45	6.05	7.45
1.17067	1.93416	2.83219	4.1	5.8	6.85	8.85
1.20283	2.0233	2.81322	4.1	5.9	7.5	8.95
1.15424	2.07495	2.9425	4	6	7.45	8.4
1.15584	2.05813	2.94445	3.8	5.7	6.95	8.6
1.18679	2.03205	2.86831	3.8	5.5	6.7	8.85
1.18992	2.08699	2.95643	3.95	5.65	6.7	8.8
1.17643	2.07389	2.9485	3.85	5.5	6.6	8.4
1.14981	1.96108	2.77873	3.7	5.2	6.25	7.7
1.076	1.86621	2.60826	3.45	5.05	6.05	7.2
0.848153	1.45991	2.03069	2.75	4.25	5.25	6.45
0.832471	1.39771	2.09176	2.75	3.9	4.7	6.15
0.781612	1.38154	2.21828	2.9	3.9	4.85	6.4
0.800487	1.49675	2.30293	3.15	4.45	5.9	7.35
0.96051	1.66068	2.45823	3.4	4.9	6.05	7.5
0.834705	1.3413	1.9209	2.75	4.15	5	6.45
0.902123	1.52284	2.20505	3.05	4.5	5.6	6.85
1.20807	2.12706	3.06714	4	5.8	7.05	8.2
1.30741	2.28867	3.21728	4.15	6.15	7.6	9.45
1.23919	2.07251	2.94137	4.05	5.8	7.2	9.5
1.22398	1.98554	2.78058	3.95	5.6	7.1	8.75
1.10622	1.80833	2.47568	3.55	4.95	6.2	7.55
0.773328	1.34335	1.85952	2.65	3.65	4.5	6.1
1.05263	1.75955	2.40472	3.1	4.4	5.5	7.55
1.53638	2.52391	3.56142	4.5	6.3	7.8	9.5
1.49741	2.51065	3.56263	4.7	6.55	7.8	9.1
1.25723	2.11925	3.00984	4.1	5.8	6.8	8.35
1.14914	2.00222	2.93922	3.9	5.5	6.6	8.05
1.19988	2.08029	2.99445	4.05	5.85	7	8.3
1.35653	2.23291	3.13676	4.3	6.25	7.7	8.9
1.25833	2.1018	2.84417	4.05	5.95	7.2	8.45
1.12617	1.89898	2.65262	3.9	5.95	6.95	8.25
1.25622	2.03036	2.98111	4.15	6.15	7.25	8.4
1.07546	1.81437	2.70391	3.7	5.45	6.6	7.4
0.997332	1.73206	2.52097	3.4	4.9	6	7.1
1.09753	1.79226	2.5266	3.45	4.8	5.75	7.4
1.22059	2.11223	3.0844	4.2	6.1	6.95	8
1.32125	2.39299	3.48322	4.6	6.5	7.55	8.55
1.35977	2.37772	3.4733	4.6	6.35	7.75	9.35
1.45586	2.39553	3.58571	4.9	7.1	8.5	9.85
1.24749	2.10873	2.94516	4.2	6.3	7.55	9
1.10302	1.95645	2.66397	3.9	6.1	7.35	9.45
1.18031	2.06798	2.90237	4.2	6.25	7.65	9.65
1.20216	2.2058	3.13684	4.2	5.65	7.5	9.5
1.1532	2.17417	3.17546	4.15	5.65	7.4	9.9
1.29949	2.27925	3.07553	4.2	5.7	6.95	8.65
1.43744	2.34032	3.10167	4.4	5.95	7.1	8.15
1.30834	2.08723	2.80607	4	5.55	6.55	8.1
1.13555	1.82732	2.48411	3.4	5	6.15	7.9
1.0206	1.63884	2.38498	3.35	5.15	6.65	8.45
1.20401	2.00032	2.80997	3.95	5.75	7.15	8.95
1.25107	2.12962	2.96118	4.05	5.6	6.75	8.4
1.03226	1.73067	2.44297	3.3	4.55	5.8	7.1
0.947726	1.5641	2.25132	3	4.4	5.65	6.75
1.08803	1.77014	2.49911	3.45	4.95	6.05	7.2
1.10379	1.77508	2.37937	3.35	4.75	5.9	7.05
1.19641	1.90507	2.67054	3.55	5.1	6.25	7.4
1.30478	2.26542	3.23561	4.35	6.05	7.2	8.45
1.22776	2.13574	2.9254	4	5.7	6.9	8.25
1.27856	2.01857	2.78349	3.75	5.5	6.7	8.15
1.29108	2.02956	2.88492	4	6.05	7.3	8.55
1.08944	1.84952	2.70626	3.95	5.9	7.15	8.3
0.88096	1.55105	2.29172	3.4	4.7	5.75	7.25
0.715652	1.17872	1.75491	2.6	3.75	4.5	6.45
0.704585	1.20539	1.80085	2.65	4.05	4.65	6.5
0.91077	1.57116	2.25593	3.35	5.15	5.75	7.3
1.0576	1.91025	2.61575	3.85	5.8	6.45	8.15
1.09419	1.99697	2.75281	3.85	5.7	6.85	8.75
1.07389	1.78852	2.58032	3.6	5.3	6.7	9
1.17733	1.93375	2.8703	4.05	5.85	7.05	8.95
1.29363	2.09339	3.09924	4.3	6	7.25	8.7
1.23555	1.93056	2.75376	3.8	5.3	6.4	8.05
1.16004	1.84215	2.58155	3.6	5.25	6.3	7.5
1.11085	1.82738	2.57115	3.65	5.15	6.45	7.5
1.12909	1.92889	2.74182	4.1	5.85	7.3	8.8
1.23083	2.10555	2.97443	4.25	6.2	7.55	8.9
1.1791	2.06711	2.9134	3.85	5.75	7.05	8.25
1.27702	2.30196	3.29597	4.25	6.4	7.8	9.15
1.40498	2.40798	3.45122	4.5	6.4	7.9	9.55
1.30866	2.11346	3.08639	4.3	6.25	7.9	9.65
1.36363	2.26859	3.26464	4.45	6.65	8.45	10.1
1.29612	2.24084	3.10009	4.2	5.9	7.3	9.3
1.08505	1.93451	2.77077	3.75	5.15	6.2	7.95
1.05771	1.85928	2.8036	3.7	5.25	6.4	7.65
1.02081	1.76362	2.60468	3.65	5.55	6.85	8.2
1.02017	1.70053	2.44189	3.55	5.4	6.75	8.15
1.06265	1.80378	2.60081	3.6	5.3	6.45	8.25
1.19293	2.01666	3.08636	4.15	5.8	7	8.8
1.29529	2.05979	3.05551	4.15	5.6	6.7	8.2
1.20746	1.95533	2.6791	3.7	5.3	6.5	8.3
1.16504	1.96266	2.82421	4	5.75	7.25	8.95
1.10541	1.95708	2.96557	4.15	5.8	7.25	8.7
0.982784	1.79823	2.69996	3.75	5.3	6.5	7.9
1.04788	1.78013	2.55691	3.7	5.15	6.05	7.2
0.997464	1.61138	2.27353	3.4	4.75	5.6	6.8
0.999518	1.64922	2.3837	3.55	5.15	6.1	7.3
1.088	1.76356	2.59039	3.8	5.3	6.3	7.5
0.985929	1.63407	2.27105	3.3	4.7	5.7	7.05
0.883054	1.51606	2.04817	3	4.35	5.25	6.3
0.961475	1.5796	2.12141	3.05	4.25	5.45	6.8
1.366	2.12981	2.8652	4	5.6	7.1	9.05
1.44719	2.2269	3.19357	4.45	6.1	7.25	8.8
1.16356	1.87438	2.83708	3.95	5.45	6.5	7.65
1.09718	1.74834	2.63155	3.75	5.4	6.6	7.85
1.21063	1.93786	2.76817	3.85	5.65	6.7	8.2
1.45029	2.34441	3.13613	4.2	6.2	7.1	8.55
1.40736	2.32724	3.19116	4.45	6.35	7.2	8.9
1.0512	1.84467	2.58958	3.7	5.35	6.3	8.25
1.00729	1.75711	2.3823	3.35	4.85	5.95	7.85
1.42221	2.28156	3.25814	4.4	6.1	7.7	9.3
1.53543	2.38971	3.47602	4.6	6.55	8.15	9.2
1.16111	1.86161	2.69019	3.7	5.6	6.85	8.45
1.09055	1.83862	2.65499	3.75	5.55	7.15	9.1
1.18836	2.02989	2.96214	4.2	6	7.75	9.25
1.23614	2.12481	3.10412	4.4	6.15	7.6	9.1
1.2943	2.26141	3.17323	4.3	6	7.3	9.1
1.22192	2.04936	2.81203	3.8	5.45	6.8	8.8
1.07	1.7778	2.51414	3.5	5.15	6.65	8.8
1.21824	2.06845	3.0136	4.25	6.2	7.6	9.3
1.29485	2.17511	3.14008	4.5	6.5	7.65	8.95
1.12434	1.9194	2.68138	3.8	5.55	6.5	7.95
1.11049	1.86906	2.53984	3.75	5.25	5.9	7.15
1.24927	2.01578	2.67338	3.9	5.35	6.05	7.6
1.40167	2.22861	3.02566	4.25	5.95	7.15	8.75
1.33395	2.1182	2.99603	4.15	5.75	7.15	8.6
1.19576	1.95745	2.69851	3.6	5.1	6.45	7.7
1.03582	1.71658	2.3318	3.25	4.8	6.05	7.5
0.970639	1.60355	2.27879	3.25	4.7	5.7	7.8
1.13053	1.93446	2.68117	3.7	5.5	6.85	8.95
1.28389	2.15216	3.06782	4.15	6.2	7.7	9.2
1.26036	2.03007	3.08529	4.25	6.05	7.4	8.4
1.2589	2.15248	3.10798	4.35	6	7.3	9.2
1.26496	2.17703	3.05382	4.25	6.2	7.7	9.6
1.04943	1.87578	2.71363	3.85	5.95	7.45	8.65
1.00521	1.85336	2.67041	3.85	5.8	7.2	8.45
1.07066	1.86852	2.66292	3.8	5.45	6.6	8.15
0.941717	1.54472	2.24489	3.1	4.55	5.55	7
0.938394	1.48419	2.11592	2.85	4.3	5.5	6.8
1.2175	1.83568	2.46969	3.4	5.2	6.4	8.3
1.31388	1.98053	2.71795	3.95	5.95	7.05	8.55
1.18948	1.94762	2.77739	4.05	5.9	6.9	8.15
1.23061	2.06218	2.84951	4.05	6	7.1	8.95
1.17356	1.9736	2.74269	3.95	5.8	6.95	8.7
1.06417	1.69689	2.47738	3.55	5.35	6.65	8.55
1.14435	1.77815	2.55306	3.5	5.25	6.75	8.6
1.36384	2.19915	3.04649	4	5.6	6.75	8.4
1.42065	2.21387	3.11847	4.1	5.7	6.4	7.9
1.21704	1.86157	2.61469	3.65	5.25	6.35	7.5
0.974001	1.56429	2.14385	3.1	4.65	6	7.25
1.0725	1.80052	2.53255	3.4	4.85	6	7.45
1.25015	2.1814	2.98213	4.1	5.6	6.6	8.05
1.01411	1.73874	2.38291	3.55	5.05	5.9	7.35
0.962285	1.58539	2.13569	3.2	4.7	5.6	6.8
1.08894	1.8112	2.32202	3.4	4.95	5.75	6.85
1.15671	1.84972	2.53375	3.65	5.2	6.05	7.3
1.06343	1.6245	2.36668	3.4	5.05	6.3	7.9
0.902514	1.42623	2.03315	2.9	4.5	5.75	7.8
1.00771	1.66089	2.35473	3.25	5	6.25	8
1.21088	1.94764	2.76564	3.85	5.6	6.75	8.75
1.31296	2.13587	2.82932	3.95	5.55	6.4	8.75
1.2046	2.02323	2.72213	3.7	5.25	6.05	7.55
1.06513	1.7605	2.52394	3.55	5.1	6	6.95
0.968627	1.6213	2.35636	3.35	4.9	5.65	6.55
0.972598	1.69161	2.41522	3.3	4.7	5.35	6.8
1.0889	1.8469	2.54126	3.5	5.1	6.2	8.15
1.13986	1.85129	2.5623	3.6	5.35	6.75	8.45
1.16188	1.86038	2.52408	3.6	5.1	6.3	7.9
1.12929	1.83411	2.51687	3.75	5.15	6.2	7.5
1.15959	1.836	2.62817	3.75	5.1	6.2	7.7
1.1259	1.81024	2.47805	3.35	4.6	5.75	7.45
1.05779	1.72863	2.38251	3.2	4.6	5.9	6.95
1.13272	1.84375	2.73829	3.65	5	6.3	7.65
1.12568	1.79547	2.68994	3.8	5.1	6.2	7.7
0.933053	1.42154	2.03813	3.15	4.5	5.15	6.4
0.810486	1.29869	1.794	2.65	3.75	4.4	5.8
0.818945	1.38923	1.96793	2.75	3.85	4.85	6.25
0.97371	1.71018	2.48805	3.45	5	6.1	7.4
1.21636	2.09106	3.08474	4.15	6	7.2	8.55
1.21743	2.04604	3.01979	4.15	6.05	7.35	8.85
1.11954	1.9477	2.82911	3.9	5.75	6.9	8.5
1.13595	2.00269	2.95063	3.9	5.7	6.8	8.45
1.08758	1.88219	2.7696	3.6	5.2	6.5	8.4
1.07747	1.80669	2.4617	3.3	4.8	6.45	8.5
1.24936	1.99913	2.64506	3.6	5.05	6.9	8.5
1.27917	2.04025	2.74632	3.55	4.95	6.45	8.05
1.20476	2.01887	2.71733	3.65	5.15	6.35	7.8
1.0561	1.78223	2.47232	3.6	5.1	6.25	7.4
1.0558	1.74819	2.50913	3.6	5.15	6.25	7.25
1.36946	2.25881	3.10083	4.3	6.2	7.45	8.45
1.37881	2.21892	3.11775	4.35	6.35	7.65	9.1
1.31813	2.10273	3.03621	4.2	5.95	7.25	8.65
1.21747	1.99792	2.85132	3.8	5.4	6.9	8.05
1.00844	1.69438	2.41644	3.2	4.8	6.35	7.3
0.95828	1.55712	2.2108	3	4.5	5.9	6.8
0.995014	1.60613	2.38424	3.4	4.95	6.4	7.85
1.33175	2.19731	3.16178	4.25	6.1	7.45	9.25
1.50078	2.51196	3.3852	4.55	6.4	7.6	9.8
1.40119	2.39718	3.12945	4.4	6.2	7.55	10.3
1.49527	2.46924	3.33706	4.55	6.35	7.85	10.4
1.61427	2.60703	3.71991	4.95	6.8	8.5	10.6
1.47038	2.53426	3.6555	4.8	6.7	8.35	9.95
1.40047	2.39018	3.44643	4.35	6.2	7.75	9.15
1.42306	2.2707	3.27093	4.1	5.9	7.25	8.5
1.2882	2.06893	3.01184	4.05	5.8	6.85	8
1.31854	2.09452	3.13625	4.15	5.85	6.9	8.1
1.24822	2.04842	2.91445	3.6	5.1	6	6.95
1.20384	2.06104	2.82246	3.55	5.2	6.5	7.65
1.2059	2.0325	2.89006	3.95	5.95	7.6	8.8
1.07564	1.90939	2.76483	3.9	5.8	6.9	8.2
0.982842	1.75232	2.48571	3.5	5.45	6.7	8.3
1.13678	1.89191	2.62556	3.55	5.35	6.85	8.35
1.27395	2.1249	2.89196	3.9	5.55	6.95	8.25
1.10562	1.85514	2.59148	3.5	5.2	6.35	7.85
1.20359	1.97662	2.75037	3.55	5.4	6.45	7.8
1.19367	1.97654	2.6269	3.6	5.6	7	8.4
1.04881	1.84773	2.55784	3.6	5.4	6.75	8.35
1.13693	2.05714	2.94007	4.05	5.7	7.1	8.8
1.25534	2.2227	3.2058	4.4	6.25	7.75	9.3
1.27389	2.25152	3.1927	4.3	6.15	7.3	8.4
1.34092	2.39845	3.31867	4.4	6.15	7.3	8.95
1.31389	2.34134	3.26056	4.35	6.3	7.85	9.5
1.06379	1.91686	2.70168	3.75	5.65	7.1	8.25
0.889868	1.56443	2.23449	3.15	4.8	5.95	7.4
1.04826	1.75032	2.42826	3.3	4.95	6.15	7.35
1.21221	2.03585	2.85528	3.8	5.45	6.6	7.95
1.27639	2.15368	3.13467	4.15	5.75	7	8.55
1.18107	2.04551	2.96591	3.9	5.4	6.65	7.95
1.10898	1.91822	2.64222	3.5	4.75	5.8	7.55
1.25703	2.14559	2.94416	3.9	5.35	6.4	7.95
1.1294	2.07027	2.88728	3.8	5.45	6.65	7.95
0.96363	1.68394	2.36004	3.15	4.6	5.75	7.2
1.02631	1.62687	2.46583	3.35	5	6	7.6
1.3225	2.17413	3.28324	4.55	6.55	7.7	9.5
1.51423	2.41974	3.4815	4.85	6.8	8.15	10
1.29437	2.03181	2.86213	4	5.85	7.2	9.35
1.01897	1.71805	2.47246	3.4	5.2	6.55	8.3
0.964521	1.67387	2.49845	3.25	4.95	6.25	7.15
1.09212	1.75269	2.55966	3.4	4.85	6.05	7.4
1.16852	1.83778	2.66123	3.65	5.4	6.4	7.95
0.994426	1.65963	2.47639	3.35	5.15	6.2	7.3
0.897838	1.54053	2.26622	3.05	4.6	5.8	6.9
1.13011	1.84267	2.59682	3.4	4.95	5.85	6.7
1.15259	1.88245	2.67121	3.45	5.1	6.1	7.1
0.971451	1.62899	2.36234	3	4.65	5.8	7.2
0.981137	1.64017	2.32395	2.95	4.25	5.15	6.65
1.02035	1.72411	2.40691	3.1	4.6	5.45	6.85
1.0588	1.74945	2.50914	3.3	5.15	5.75	6.7
1.22057	2.00663	2.79913	3.65	5.3	6.2	7.2
1.2761	2.19565	2.95763	3.8	5.35	6.4	7.35
1.19998	2.0394	2.68486	3.55	4.9	5.5	6.5
0.910641	1.55107	2.06246	2.8	3.85	4.65	6
0.712935	1.29132	1.84161	2.5	3.7	4.8	6.5
1.14988	1.92751	2.71458	3.4	4.95	6.1	7.65
1.4121	2.26647	3.07502	3.85	5.55	6.65	8.2
1.21831	2.03189	2.78906	3.55	5.05	6.1	7.9
1.13567	1.935	2.7249	3.4	4.65	5.9	7.4
1.16313	1.90844	2.7088	3.45	4.7	5.8	7.1
1.06558	1.79146	2.57137	3.5	4.8	5.5	7.1
0.952208	1.7497	2.46496	3.35	4.6	5.45	7
0.921402	1.68619	2.43853	3.1	4.55	5.55	6.65
0.962009	1.60899	2.42246	3.2	4.7	5.65	6.6
0.904229	1.5126	2.29468	3.25	4.5	5.4	6.5
1.02393	1.6945	2.39235	3.25	4.5	5.6	7
1.21753	1.97047	2.70174	3.5	4.85	5.85	7
1.03911	1.75156	2.44889	3.4	4.85	5.65	6.75
1.00284	1.73564	2.38246	3.35	4.95	5.85	7.3
0.97688	1.69189	2.43836	3.3	4.75	6.15	7.75
0.985885	1.66677	2.51043	3.45	4.9	6.4	7.85
1.17503	1.96964	2.80698	3.75	5.55	6.85	8.05
1.28017	2.12502	2.97357	3.95	5.9	7.35	8.6
1.36724	2.27868	3.34072	4.6	6.75	7.8	9
1.25916	2.14821	3.20702	4.5	6.7	7.55	8.95
1.19123	1.92755	2.79415	3.85	5.8	6.75	8.2
1.20523	2.01169	2.86781	3.85	5.4	6.35	7.7
0.92115	1.61029	2.25017	3.1	4.35	5.25	6.85
0.71269	1.25389	1.74966	2.5	3.9	4.75	6.1
0.860396	1.50682	2.05892	2.8	4.05	5	5.95
1.03567	1.71779	2.39705	3.1	4.15	5.15	6.15
1.11327	1.85305	2.69467	3.6	5	5.85	7
1.05483	1.80838	2.57456	3.65	5.4	6.35	7.35
1.11375	1.77364	2.42205	3.45	5.05	6.05	7.25
1.29579	1.99506	2.77413	3.75	5.4	6.3	7.8
1.1866	2.00174	2.98011	4	5.65	6.9	8.4
1.09297	2.0067	2.88801	4	5.45	6.4	7.85
1.16328	2.02134	2.74852	3.75	5.25	6.05	7.3
1.07107	1.78531	2.49251	3.3	4.95	6.15	7.25
1.02008	1.74204	2.50814	3.35	5.15	6.3	7.7
1.0407	1.72136	2.36421	3.3	4.85	5.9	7.45
0.928685	1.54614	2.03441	2.95	4.15	5.4	6.8
0.919235	1.55946	2.15243	3	4.4	5.75	7.1
1.0833	1.85016	2.68538	3.75	5.55	6.75	8
1.08179	1.91545	2.91849	4.05	5.85	7.05	8.1
1.09273	1.74616	2.48614	3.4	5.4	6.45	7.3
1.05847	1.63228	2.15213	3.05	4.8	5.65	6.95
0.979447	1.6731	2.37721	3.4	4.7	5.5	7.1
1.04011	1.78182	2.59346	3.6	5	5.85	7.2
1.08386	1.75733	2.46125	3.4	4.7	5.8	6.85
1.1103	1.71145	2.46456	3.35	4.7	5.85	7.1
1.09043	1.62787	2.33997	3.25	4.9	5.9	7.2
1.11563	1.66549	2.30818	3.35	4.95	6.2	7.3
1.06017	1.64227	2.26722	3.15	4.45	5.7	7
0.916362	1.4464	2.01089	2.7	4.05	5	6.5
0.903649	1.52125	2.1928	2.9	4.25	5.2	6.55
0.839138	1.49193	2.1702	2.95	4.05	5.1	6.3
0.873449	1.59269	2.21564	2.95	4.15	5.25	6.65
1.05938	1.85178	2.65306	3.5	5.05	6.05	6.95
0.957775	1.60536	2.41056	3.35	4.9	5.75	5.95
0.765481	1.25404	1.75293	2.45	3.6	4.5	4.9
0.85169	1.39223	1.90453	2.55	3.9	4.85	5.6
1.06673	1.75746	2.39879	3.2	4.8	5.85	7
1.25881	2.04947	2.75844	3.65	5.15	6.45	7.85
1.24619	2.0578	2.87609	3.85	5.45	6.65	8.25
1.04624	1.75635	2.55549	3.5	4.95	6.05	7.75
1.04795	1.70098	2.4104	3.3	4.55	5.5	6.7
1.06261	1.77357	2.47189	3.35	4.7	5.7	6.75
1.02794	1.83257	2.54952	3.45	5.05	6.05	7.05
0.989592	1.71234	2.44531	3.4	4.95	5.8	6.8
0.862752	1.47352	2.13134	2.95	4.3	5.15	6.3
0.697413	1.19444	1.69056	2.3	3.55	4.1	5.4
0.793018	1.27492	1.75962	2.3	3.4	4.05	5.35
1.07691	1.69011	2.16035	2.7	3.8	4.75	6.35
1.03793	1.66284	2.2073	2.8	4	5.1	6.9
0.957754	1.64071	2.35341	3.15	4.5	5.4	6.85
1.07218	1.89129	2.57728	3.6	5.1	5.95	7.3
1.03838	1.74973	2.37981	3.3	4.65	5.8	7.35
0.969139	1.64894	2.26786	2.95	4.3	5.5	7.1
1.17882	1.93383	2.63691	3.35	4.8	6	7.5
1.30176	2.03416	2.82579	3.65	5.2	6.2	7.55
1.27619	2.05559	2.80702	3.7	5.2	6	7.4
1.24882	1.98811	2.78646	3.75	5.15	6.05	7.35
1.09373	1.7496	2.5426	3.35	4.7	5.85	6.9
1.02135	1.69923	2.32667	2.95	4.4	5.15	5.9
0.863343	1.44961	2.01378	2.6	3.95	4.5	5.35
0.878147	1.5188	2.15921	2.75	4.15	5.15	6.55
1.1231	1.96039	2.74132	3.75	5.65	6.75	7.9
1.28711	2.18665	2.98325	4.15	6	7	8.2
1.30704	2.1758	2.86372	3.85	5.4	6.65	8.55
1.22878	2.11284	2.76379	3.85	5.65	7.35	9.2
1.34302	2.3801	3.28244	4.4	6.55	8.5	9.85
1.35422	2.45382	3.60106	4.65	6.45	8.3	9.65
1.1401	2.02929	2.97126	4.1	5.7	6.9	8.25
1.15385	1.95053	2.79324	3.9	5.3	6.35	8.1
1.23979	2.06294	2.86489	3.85	5.1	6.15	8.2
1.07446	1.78192	2.44817	3.4	5.05	6	7.95
1.0599	1.80627	2.46655	3.3	4.8	6	7.65
1.06276	1.80838	2.44312	3.25	4.55	5.4	6.9
0.941886	1.60121	2.21647	3.15	4.6	5.1	6.55
0.981298	1.68946	2.34698	3.35	4.5	5.2	6.55
1.06812	1.84853	2.60774	3.6	4.75	5.7	7.4
1.13197	1.91175	2.69696	3.65	5.4	6.45	7.75
1.09211	1.82745	2.62353	3.6	5.45	6.65	7.5
1.08692	1.83758	2.75112	3.65	5.4	6.5	7.75
1.11233	1.92616	2.79212	3.55	5.3	6.4	8.1
0.990541	1.74412	2.48194	3.3	5.1	6.35	8.2
0.955024	1.74471	2.60782	3.55	5.45	6.55	8.5
1.02387	1.91325	2.87105	3.9	5.6	6.55	8.4
1.13337	2.06189	2.8501	3.9	5.65	6.75	8.65
1.12673	2.02614	2.73579	3.75	5.35	6.45	8.25
1.10391	1.94414	2.77904	3.65	5	6.2	7.7
1.16353	1.92657	2.73967	3.5	4.9	6.35	7.85
1.02703	1.64094	2.23998	3.05	4.55	5.55	7.05
0.921615	1.53534	2.13551	2.95	4.55	5.7	7.15
1.03387	1.74969	2.60574	3.5	5.2	6.7	8.05
1.13211	1.894	2.72688	3.6	5.25	6.45	8.05
1.16336	1.98376	2.78198	3.55	5.3	6.65	8.1
1.07673	1.82796	2.75564	3.65	5.5	6.95	8.45
1.0231	1.67723	2.54605	3.55	5.05	6.25	7.65
1.06517	1.7575	2.51266	3.5	4.7	5.65	6.6
0.964744	1.62054	2.25448	3.1	4.35	5.4	6.4
0.964735	1.57875	2.18926	2.9	4.4	5.9	7.2
0.973723	1.63716	2.21179	3	4.5	5.7	7.15
0.969316	1.72906	2.40047	3.35	4.75	5.7	7.3
1.24146	2.10791	2.96034	4.1	5.7	6.85	8.55
1.31554	2.12138	2.90493	3.95	5.55	6.75	8.05
1.20151	2.03782	2.91736	3.65	5.2	6.35	7.6
1.2843	2.23193	3.20227	4	5.7	6.8	8.1
1.38758	2.30615	3.18554	4.15	5.8	6.9	8.05
1.1975	1.98592	2.74245	3.65	5.05	6.1	7.25
0.899929	1.50532	2.14558	2.9	4.2	5.25	6.5
0.802581	1.40479	2.0136	2.75	4.2	5	6.3
1.05302	1.74522	2.39408	3.15	4.65	5.3	6.85
1.31228	2.05713	2.83261	3.7	5.5	6.35	8
1.16937	1.92036	2.71723	3.55	5.3	6.6	8.25
1.00293	1.66214	2.36615	3.1	4.4	5.85	7.3
1.03423	1.729	2.53526	3.35	4.6	5.85	7.35
0.960013	1.65668	2.45806	3.35	4.85	5.9	7.45
0.806509	1.35653	1.99987	2.9	4.5	5.45	6.4
0.808711	1.34623	1.99827	2.8	4.15	5.05	5.55
0.781031	1.32246	1.86124	2.5	3.55	4.2	5.1
0.899453	1.51919	2.0831	2.75	3.85	4.65	6.25
0.985508	1.63838	2.38426	3.2	4.3	5.4	7.25
0.864125	1.46869	2.16146	2.95	4.05	5.3	6.8
0.828093	1.45215	1.97446	2.7	4	5.25	6.55
0.927985	1.63131	2.1154	2.9	4.05	5.05	6.3
0.955581	1.70382	2.28238	3.15	4.25	5.3	6.25
0.794299	1.39915	2.01201	2.8	3.85	5.1	6.25
0.826222	1.40814	1.97824	2.7	3.8	4.9	6.15
0.959455	1.61554	2.16957	2.9	4.35	5.4	6.3
1.04493	1.69111	2.24988	3.05	4.4	5.7	6.85
1.08805	1.76404	2.4128	3.25	4.55	5.65	7.4
1.0581	1.67383	2.34737	3.25	4.65	5.2	6.7
0.905029	1.43315	2.00271	2.85	3.95	4.8	5.95
0.803311	1.34796	1.90822	2.65	3.7	4.95	5.95
1.01258	1.67927	2.26599	3.1	4.45	5.5	6.35
1.12922	1.90649	2.57595	3.45	4.95	5.9	7.2
1.10025	1.87945	2.64896	3.5	5.1	6	7.55
1.01898	1.70392	2.51648	3.35	5	5.85	7.3
1.05621	1.75338	2.71814	3.65	5.15	5.9	7.1
1.0476	1.62664	2.46763	3.4	4.7	5.35	6.4
0.990925	1.51001	2.18391	2.9	4	4.7	5.85
0.935474	1.54447	2.22867	2.9	3.9	4.55	5.9
0.968558	1.66225	2.40856	3.15	4.25	5.3	6.85
0.993299	1.67661	2.44549	3.2	4.3	5.5	6.75
0.90389	1.46871	2.10225	2.9	3.95	4.6	6.1
1.02326	1.72197	2.46522	3.3	4.6	5.15	6.7
1.14038	1.91817	2.72397	3.5	4.8	6	7.25
1.19012	1.92563	2.78659	3.6	5.05	6.65	8
1.09791	1.74645	2.62524	3.5	5.05	6.45	7.75
0.983416	1.54732	2.25582	3.05	4.4	5.7	7.05
1.07396	1.73469	2.47591	3.25	4.6	5.75	7.2
1.0803	1.72819	2.47903	3.25	4.55	5.65	7
0.984953	1.59466	2.25275	3	4.45	5.45	6.55
1.18607	1.9662	2.69289	3.55	5.15	6.25	7.55
1.44568	2.29694	3.25261	4.2	5.9	7.5	9.4
1.31046	2.06773	3.03394	3.85	5.5	7.25	9.05
1.13596	1.87762	2.66742	3.35	4.95	6.5	8.15
1.23926	2.17706	2.95734	3.8	5.5	6.85	8.6
1.34997	2.4595	3.49805	4.5	6.3	7.7	9.3
1.23295	2.17894	3.32454	4.3	6.15	7.9	9.85
1.11491	1.97012	2.87706	4	5.8	7.25	9
1.04797	1.87409	2.62554	3.7	5.25	6.3	7.8
1.00111	1.70275	2.48087	3.4	4.6	5.4	6.95
0.958873	1.64963	2.42559	3.25	4.35	5.2	6.65
1.03606	1.72024	2.51713	3.35	4.75	6.35	8.15
1.20372	1.9578	2.89926	3.9	5.65	7.25	8.55
1.20288	2.06315	2.97024	3.9	5.6	6.7	7.9
1.09429	1.92492	2.70847	3.6	5.2	6.35	8.4
1.1324	1.89791	2.56732	3.5	5.05	6.35	8.4
1.1257	1.877	2.51351	3.4	4.95	6.1	7.55
0.967968	1.62883	2.29409	3.15	4.7	5.8	7.2
1.10601	1.82497	2.73322	3.65	5.35	6.5	8.1
1.16815	1.89391	2.80938	3.85	5.45	6.65	7.95
1.00653	1.54925	2.17824	3.25	4.55	5.6	6.6
0.935135	1.48547	2.02611	2.95	4.25	5.2	6.1
1.0401	1.87419	2.53544	3.35	4.9	5.9	7.05
1.27788	2.27477	3.07924	3.95	5.65	6.75	8.35
1.38305	2.25658	3.13848	4.1	5.75	6.75	8.3
1.22371	1.97283	2.85097	3.8	5.5	6.4	8.05
1.25849	1.97314	2.84998	3.75	5.6	6.65	8
1.21946	2.00152	2.73456	3.75	5.4	6.25	7.25
0.916691	1.75447	2.3363	3.2	4.7	5.5	6.95
0.731919	1.43023	2.11754	2.75	4.4	5.5	6.9
0.802578	1.40704	2.05188	2.8	4.15	5.2	6.35
1.04504	1.79287	2.48218	3.35	4.75	5.85	7.05
1.13245	2.03777	2.85612	3.95	5.55	6.65	8.1
1.0488	1.96823	2.85875	4	5.45	6.55	7.9
0.892727	1.66712	2.4163	3.3	4.7	5.8	7.2
0.936902	1.66679	2.18794	3	4.45	5.45	7.15
1.13706	1.86394	2.36804	3.35	4.7	5.9	7.2
0.999266	1.59991	2.18086	3.15	4.35	5.6	6.75
0.858019	1.38298	2.04657	2.95	4.3	5.4	6.75
0.987192	1.57213	2.18537	3.25	4.75	5.7	7.2
0.914065	1.56359	2.14439	3.2	4.6	5.75	7.4
0.845788	1.40944	2.02342	2.95	4.25	5.5	6.9
0.944581	1.44033	2.05894	2.95	4.15	4.9	6
0.89933	1.38052	1.95188	2.8	3.75	4.3	5.6
0.828523	1.32981	1.8067	2.5	3.45	4.05	5.45
0.900498	1.45721	1.96467	2.5	3.6	4.2	5.35
0.839102	1.39455	1.91148	2.5	3.55	4.3	5.7
0.728013	1.28313	1.8495	2.6	3.7	4.55	6.45
0.879899	1.47661	2.09786	3.1	4.5	5.35	7.05
0.933037	1.5384	2.11338	3	4.4	5.1	6.35
0.864207	1.41733	1.93499	2.6	3.9	4.4	5.6
0.808723	1.32222	1.82552	2.55	3.95	4.45	5.7
0.811512	1.38223	1.97261	2.65	3.85	4.8	6.2
1.00654	1.70518	2.34616	3.05	4.1	5.2	6.75
1.11798	1.96933	2.88983	3.75	5.3	6.5	7.75
1.05207	1.86139	2.91802	4	5.7	7.05	8.2
0.976213	1.59877	2.4202	3.55	4.9	5.95	7.6
0.897411	1.48131	2.13005	3.15	4.4	5.4	7.05
0.891146	1.55105	2.23822	3.15	4.45	5.7	7.1
1.26283	2.12299	2.96412	3.9	5.35	6.8	8.4
1.45878	2.39188	3.09364	4	5.4	6.85	8.35
1.32565	2.1828	2.80792	3.75	5	6.2	7.05
1.22814	1.96879	2.57618	3.5	4.7	5.65	6.35
1.03464	1.58873	2.08732	2.8	3.95	4.85	6
0.987137	1.54424	2.10337	2.8	4	5	5.9
0.986051	1.66257	2.40948	3.25	4.7	5.8	6.6
0.962202	1.653	2.52477	3.5	4.95	6.15	7.7
0.981884	1.63189	2.47225	3.4	4.8	6.05	7.5
1.05199	1.80127	2.48151	3.25	4.65	5.8	6.8
1.22524	2.06087	2.80027	3.5	5.15	6.2	7.4
1.22679	2.11742	3.06463	3.85	5.65	6.75	7.75
1.14676	2.03471	2.76306	3.7	5.05	6.25	6.9
1.12961	1.92119	2.53447	3.5	4.8	5.8	6.75
1.06737	1.72351	2.38042	3.2	4.65	5.55	6.75
0.95464	1.50379	2.17614	3.1	4.5	5.45	6.9
0.92783	1.5452	2.27961	3.35	4.7	5.6	7.05
1.10448	1.88299	2.68435	3.55	4.85	5.6	6.7
1.09735	1.90615	2.65575	3.3	4.45	5.45	6.85
0.840238	1.49386	2.10002	2.8	3.9	5	6.65
0.713198	1.2992	1.91835	2.7	3.95	5	6.5
0.779677	1.40522	1.98687	2.85	4.3	5.4	6.75
1.03967	1.7949	2.44011	3.35	5.1	6.2	7.35
1.16975	2.00225	2.80519	3.7	5.35	6.75	7.9
1.11126	1.87385	2.70353	3.55	5	6.3	7.7
1.09755	1.81273	2.57958	3.35	4.8	5.7	7.45
0.992361	1.79298	2.58049	3.4	4.9	5.9	7.6
1.02752	1.84655	2.64977	3.45	4.95	6.3	7.5
1.14906	1.87867	2.52135	3.3	4.8	6	7.15
1.02018	1.69585	2.30751	3.1	4.4	5.4	6.95
0.901566	1.5499	2.14537	2.8	3.7	4.45	6.1
0.816303	1.38223	1.88544	2.5	3.6	4.45	5.8
0.768605	1.36042	1.91527	2.7	4.05	4.8	5.9
0.72886	1.35004	1.93536	2.75	4.05	4.7	5.65
0.648595	1.10633	1.58865	2.25	3.25	4.25	5.2
0.698478	1.11281	1.57172	2.15	3	3.9	5.05
0.935929	1.56266	2.12	2.8	3.85	4.75	6
1.05827	1.90731	2.52837	3.2	4.4	5.5	6.5
0.946138	1.84096	2.39347	3.05	4.45	5.35	6.2
0.905894	1.64249	2.12916	2.75	3.95	4.65	5.8
0.992992	1.63924	2.21139	2.75	3.9	4.75	5.95
0.955169	1.7253	2.3162	2.95	4.3	5.3	6.5
0.974534	1.68955	2.33788	2.95	4.45	5.4	6.9
1.10541	1.75086	2.45228	3.1	4.6	5.4	6.8
1.05716	1.72283	2.36193	3.15	4.45	5.1	6
0.823943	1.35498	1.90734	2.55	3.7	4.4	5.3
0.744198	1.15625	1.74295	2.3	3.25	4.15	5.1
0.685402	1.10025	1.70604	2.3	3.15	3.85	4.95
0.593035	1.05589	1.60751	2.25	3.3	3.75	4.6
0.752538	1.38649	2.00332	2.75	3.95	4.65	5.1
0.863636	1.50086	2.08486	2.8	3.95	4.8	5.55
0.920744	1.3935	1.92909	2.5	3.7	4.55	5.6
0.936612	1.42358	1.95562	2.5	3.65	4.65	5.7
0.829097	1.34254	1.87413	2.4	3.3	4.15	5.15
0.930758	1.45067	2.01202	2.55	3.2	4.15	5.45
0.934	1.52287	2.05199	2.65	3.45	4.6	5.95
0.778609	1.38205	1.86462	2.45	3.65	4.45	6
0.95451	1.5851	2.18387	2.8	4.25	5.05	6.55
1.10103	1.86832	2.7211	3.35	4.7	5.65	6.85
1.06356	1.7659	2.5891	3.25	4.35	5.1	6.4
0.880775	1.38916	2.0139	2.6	3.8	4.35	5.45
0.965359	1.57619	2.22366	2.8	4.1	4.5	5.2
1.02904	1.68177	2.41401	3	4.1	4.8	5.75
0.994633	1.62167	2.29886	2.85	4	5.05	6.05
1.08816	1.77808	2.38444	3	4.15	5.25	6
1.009	1.67147	2.22845	2.85	4.05	5.2	6.45
0.954001	1.57327	2.14096	2.8	4.15	5.15	6.65
1.00088	1.64283	2.29052	2.95	4.25	5.2	6.5
0.966197	1.63729	2.28902	2.9	4.35	5.7	6.8
0.894674	1.54255	2.15206	2.85	4.35	5.55	6.85
0.986159	1.73445	2.34873	3.05	4.35	5.2	7.3
1.14295	1.97496	2.7132	3.55	5.15	6	7.45
1.23462	2.13471	3.0027	4	6	6.95	7.25
1.16862	2.04962	2.77265	3.6	5.35	6.3	7.15
1.03577	1.90112	2.63659	3.35	4.8	5.8	7.3
0.999571	1.83447	2.63266	3.4	4.8	5.9	7.45
0.88912	1.57907	2.23982	3.05	4.1	5.3	6.65
0.808546	1.42364	1.99223	2.7	3.55	4.55	5.8
0.849559	1.38999	1.93962	2.6	3.7	4.7	6.3
0.961713	1.58794	2.25349	3.05	4.45	5.7	7.45
1.00518	1.73207	2.47033	3.25	4.75	5.85	7.05
1.0358	1.78237	2.39821	3.1	4.55	5.9	7.15
1.32046	2.09753	2.8149	3.7	5.1	6.75	8.35
1.37369	2.23276	3.18309	4.2	5.65	7.2	8.5
1.15502	1.94612	2.73272	3.6	5.4	6.65	7.85
1.15272	1.88252	2.54332	3.35	5.3	6.45	7.8
1.23375	2.04749	2.77957	3.6	5.2	6.15	7.35
1.21907	2.07171	2.95935	3.8	5.2	5.95	7.15
1.13309	1.97598	2.89841	3.75	5.1	6	7.45
1.02286	1.75241	2.55054	3.3	4.65	5.6	7.1
1.08641	1.72618	2.3964	3.1	4.55	5.45	6.85
1.25532	1.89335	2.6237	3.5	4.9	5.95	7.15
1.2805	2.01539	2.85495	3.8	5.2	6.25	7.45
1.15708	1.94156	2.65889	3.45	4.8	5.8	7.05
1.00256	1.76795	2.51536	3.35	4.7	5.9	6.75
0.897597	1.61306	2.36276	3.2	4.55	5.7	6.8
1.0572	1.80594	2.57892	3.45	4.85	5.85	7.25
1.25677	2.04422	2.88567	3.75	5.2	6.3	7.35
1.20243	1.89136	2.6568	3.45	4.95	5.75	7
1.14458	1.82553	2.67081	3.45	4.75	5.5	7
1.32253	2.13447	3.07622	3.8	4.9	5.9	7.35
1.2697	2.1535	3.02474	3.75	5.05	6	7.4
1.17392	2.13304	2.95119	3.7	5.5	6.8	7.9
1.25698	2.31958	3.12443	4.05	5.95	7.25	8.55
1.31385	2.34456	3.17437	4.2	5.9	7	8.65
1.42602	2.35319	3.20915	4.2	6	7.15	8.65
1.26174	2.07838	2.73891	3.6	5.15	6.35	7.8
1.08583	1.81939	2.48004	3.25	4.5	5.6	6.9
1.07493	1.79108	2.48879	3.3	4.6	5.55	6.85
0.984986	1.79653	2.41203	3.25	4.65	5.7	6.85
0.979882	1.71317	2.39962	3.25	4.6	5.5	6.45
1.00007	1.68421	2.41921	3.2	4.75	5.55	6.3
0.906176	1.66265	2.31465	3.15	4.65	5.5	6.1
0.925029	1.64221	2.16513	2.95	4.25	5.05	5.8
0.991287	1.6664	2.14479	2.9	4.1	5	5.75
1.0886	1.76477	2.2981	3.1	4.15	5.05	6.15
1.01702	1.60691	2.19377	2.9	4.05	5.1	6.5
0.953527	1.49744	2.09082	2.75	4.15	5.35	6.65
0.943548	1.46199	2.07995	2.7	3.95	5.05	6.4
0.945384	1.48065	2.13872	2.8	3.85	5	6.15
1.10475	1.86263	2.64275	3.4	4.85	5.9	6.8
1.09024	1.89105	2.61783	3.4	4.85	5.65	6.65
0.934628	1.63657	2.20977	2.9	3.95	4.85	5.95
0.799547	1.38919	1.8546	2.45	3.6	4.55	5.8
0.85993	1.40466	1.96584	2.75	4.2	4.95	6.2
1.02542	1.65205	2.40882	3.4	4.8	5.6	6.8
1.11015	1.85295	2.6981	3.7	5.1	6.25	7.65
1.20274	2.0393	2.98672	3.95	5.6	6.9	8.3
1.29757	2.12987	3.09798	3.95	5.45	6.75	7.9
1.21796	1.9964	2.89692	3.65	4.95	6.15	7.35
1.1965	2.08203	2.97869	3.7	5.25	6.3	7.75
1.19968	2.19752	3.12251	3.9	5.45	6.4	7.75
1.0499	1.91247	2.68433	3.35	4.55	5.45	6.55
1.07609	1.72757	2.35395	3.05	4.2	5.15	6.4
1.19045	1.79951	2.38037	3.25	4.6	5.65	6.75
1.05884	1.7455	2.42144	3.3	4.65	6.05	7.05
1.07531	1.91217	2.72637	3.55	5	6.3	7.35
1.25496	2.20366	3.10411	3.85	5.4	6.7	7.85
1.31004	2.19975	3.04316	3.8	5.45	6.75	8.15
1.26333	2.07098	2.70337	3.55	5.3	6.4	7.75
1.01681	1.69365	2.28321	3.1	4.5	5.65	7.3
0.805609	1.4181	2	2.7	3.85	4.75	6.6
0.860599	1.57259	2.26973	2.95	4.25	4.95	6.45
1.01346	1.73317	2.51186	3.2	4.75	5.4	6.55
1.09207	1.73937	2.36182	3.1	4.7	5.35	6.1
1.06014	1.68674	2.30465	3.1	4.65	5.2	5.95
0.943567	1.55936	2.23724	3.05	4.4	4.95	6.05
0.949684	1.59987	2.23006	3	4	4.65	5.8
1.14497	1.86065	2.40373	3.05	4.15	5.1	6.25
1.13463	1.80537	2.39547	3.05	4.25	5.25	6.5
0.924592	1.53716	2.17642	2.95	4.1	4.9	6.55
1.02818	1.75158	2.36801	3.1	4.55	5.5	7
1.14285	1.9461	2.7164	3.45	5	6.05	7.2
1.33858	2.18889	3.04606	3.9	5.4	6.55	7.85
1.2333	2.03916	2.82992	3.65	5.05	6.15	7.85
0.947955	1.52849	2.2458	3.05	4.35	5.4	7.05
1.17065	1.79293	2.58761	3.5	4.95	6.15	7.4
1.17743	1.87468	2.66882	3.65	5	6.4	7.55
0.877021	1.43944	2.01709	2.9	4.15	5.65	6.4
0.758923	1.29569	1.76337	2.55	3.75	5	5.7
0.945092	1.53342	2.01569	2.7	4.15	5.35	6.4
1.05805	1.60999	2.17377	2.8	4.3	5.5	6.85
1.05896	1.76797	2.33535	3.1	4.25	5.15	6.5
0.934769	1.68916	2.19984	3	4.1	4.75	5.9
0.737753	1.23784	1.643	2.35	3.4	4	5.25
0.674694	1.16582	1.65296	2.25	3.35	4.3	5.25
0.642525	1.21065	1.94362	2.7	4.15	5.3	6.45
0.786745	1.4776	2.32895	3.3	4.75	5.8	7.2
1.00025	1.78122	2.61545	3.65	5	5.95	7.7
1.01111	1.92088	2.77709	3.85	5.4	6.65	8.55
1.01817	1.9326	2.85901	3.85	5.5	6.85	8.65
1.11411	1.91803	2.75416	3.65	5.2	6.55	8.25
1.16741	2.02268	2.7643	3.65	5.1	6.35	7.55
1.02154	1.80173	2.45391	3.25	4.65	5.4	6.8
0.866731	1.58904	2.28704	2.95	4.25	5	6.45
0.898383	1.58626	2.33167	3	4.25	5.15	6.2
0.817519	1.32197	1.84739	2.45	3.65	4.65	5.7
0.897376	1.43905	1.94741	2.55	3.65	4.9	6.05
1.08796	1.76369	2.50603	3.15	4.3	5.35	6.3
0.910063	1.46568	2.13921	2.8	4.2	5	6
0.881879	1.44819	2.0007	2.8	4.1	5.25	6.25
0.941969	1.63211	2.24275	2.95	4	5.1	6.25
0.892171	1.58032	2.21473	2.75	4.1	5	6.25
0.998054	1.66421	2.39298	3.05	4.5	5.65	6.7
1.12808	1.91852	2.71579	3.5	4.9	6.25	7.15
1.14107	1.91705	2.656	3.4	4.8	5.85	6.7
0.884445	1.52531	2.14151	2.85	3.9	4.6	5.5
0.735877	1.33038	1.86514	2.55	3.5	4.2	5.15
0.805686	1.35581	1.87243	2.5	3.55	4.25	5.3
0.763897	1.29024	1.75959	2.35	3.3	4.15	5.2
1.00059	1.6616	2.22469	2.95	4.1	5.2	6.45
1.14426	1.94226	2.71182	3.6	5.3	6.65	8.15
1.06212	1.83452	2.60203	3.6	5.3	6.85	8.4
1.14737	1.86717	2.58594	3.55	4.9	6.25	7.7
1.11838	1.77464	2.42348	3.25	4.5	5.4	6.45
1.12903	1.86587	2.499	3.25	4.7	5.5	6.45
0.993052	1.678	2.29674	3	4.45	5.25	6.35
0.959933	1.56718	2.19151	2.95	4.3	4.9	5.95
1.01805	1.72184	2.3384	3.05	4.6	5.55	6.95
1.0701	1.81985	2.48337	3.3	4.95	6.15	7.65
1.06545	1.81225	2.63099	3.55	5.25	6.3	7.4
0.887369	1.5888	2.36699	3.25	4.9	6.3	7.65
1.00069	1.6224	2.37025	3.35	4.8	6.4	7.95
1.1094	1.85143	2.6015	3.55	5	6.35	7.65
1.12398	1.99811	2.7204	3.6	5.15	6.35	7.5
1.01139	1.74073	2.3594	3.2	4.65	5.75	6.95
0.855361	1.48061	2.05628	2.8	3.9	4.7	6.15
0.863784	1.50066	2.13661	2.95	4.1	4.75	6.2
0.891553	1.58248	2.31818	3.15	4.6	5.45	6.8
1.27234	2.14799	3.06511	4	5.45	6.35	7.65
1.26692	2.09924	2.92052	3.85	5.4	6.3	7.25
0.840397	1.42157	2.09777	2.7	4.3	5.25	6.5
1.11124	1.85604	2.57721	3.2	4.8	5.65	7.1
1.13463	1.92261	2.62412	3.4	5.05	5.9	6.9
0.91585	1.48877	2.13263	2.9	4.3	4.95	6.25
0.910394	1.51397	2.13128	2.8	4.1	4.9	6.7
0.8311	1.50442	2.06247	2.75	4.2	5.15	6.7
0.979462	1.74168	2.34553	3.2	4.9	6.05	7.2
1.30129	2.2436	3.09627	4.05	5.85	7.25	8.45
1.20323	2.09951	2.99723	3.8	5.5	6.7	8.4
0.998911	1.81758	2.61183	3.4	4.95	6.1	7.65
1.10443	1.98413	2.72985	3.6	4.95	5.85	7.2
1.10187	1.86948	2.60912	3.45	4.8	5.75	6.95
0.942807	1.57907	2.32628	3.2	4.45	5.7	6.85
0.906211	1.5514	2.20037	3.05	4.15	5	6.65
1.00911	1.68595	2.43491	3.4	4.55	5.4	6.95
1.14385	1.97839	2.82226	3.85	5.25	6.35	8.1
1.26369	2.1968	2.97362	3.95	5.45	6.45	8.4
1.36064	2.16684	2.8967	3.85	5.25	6.8	8.1
1.31821	2.01829	2.81175	3.7	5.05	6.5	7.85
1.26824	1.984	2.81474	3.75	5.2	6.15	7.65
1.2218	1.95646	2.69722	3.6	5.1	6.1	7.2
0.996309	1.69975	2.35497	3.2	4.55	5.55	6.75
1.06578	1.72167	2.35462	3.15	4.8	6	7.2
1.1686	1.82573	2.64842	3.45	5.1	6.4	7.4
0.996314	1.77356	2.54374	3.45	4.85	5.85	6.95
0.898398	1.64194	2.26207	3.1	4.55	5.4	6.7
0.839108	1.41811	2.09588	2.95	4.4	5.2	6.55
0.74571	1.38376	2.10758	3.05	4.65	5.6	6.7
0.857654	1.52256	2.17109	3.05	4.45	5.55	6.35
0.93212	1.57513	2.09145	2.95	4.2	5.45	6.4
0.931389	1.59395	2.2159	3.05	4.4	5.6	6.6
0.926606	1.60751	2.49965	3.35	4.85	6	7.1
1.01498	1.79054	2.84186	3.65	5.3	6.5	7.75
0.94766	1.62677	2.58108	3.3	4.65	5.75	6.95
0.715842	1.23856	1.95013	2.6	3.8	4.85	6.4
0.726308	1.20284	1.76076	2.35	3.7	4.6	6.35
0.765058	1.27263	1.81347	2.5	3.8	4.8	6.4
0.861364	1.45733	2.09498	2.8	4	5.25	6.5
0.868782	1.51139	2.12694	2.85	3.95	5.05	5.85
0.879939	1.56277	2.27253	3	4.1	4.8	6
0.924031	1.58585	2.33193	3.15	4.35	5.25	6.6
0.781519	1.34978	1.93306	2.85	4.2	5.3	6.15
0.709957	1.28333	1.8813	2.7	4.05	4.95	5.5
0.876827	1.47058	2.16384	2.95	4.15	5	5.75
0.895819	1.41174	2.14501	2.85	4.15	5.3	6.7
0.974235	1.57789	2.2844	2.95	4.55	6.05	8.05
1.05487	1.73821	2.39392	3.15	4.8	6.3	8
1.09894	1.86127	2.52969	3.35	4.95	6.45	7.45
1.35473	2.30153	3.17415	4	5.85	7.15	8.35
1.41876	2.32409	3.3729	4.25	6.15	7.1	8.55
1.35838	2.19111	3.13252	4.15	6	7.3	8.8
1.27943	2.15168	2.93336	4	5.65	7.2	8.75
1.08755	1.89001	2.73836	3.9	5.5	7.05	8.6
1.05309	1.83309	2.66744	3.65	5.35	6.95	8.45
1.08987	1.99404	2.75088	3.65	5.3	6.55	7.75
1.06235	1.90031	2.69088	3.65	5.45	6.75	7.95
1.23203	2.03039	2.86338	3.8	5.8	7.5	8.65
1.33902	2.21489	3.09199	4.1	6.05	7.6	8.65
1.19677	2.04006	2.96037	3.85	5.7	6.95	8.2
1.13855	1.96188	2.8068	3.65	5.2	6.3	7.8
1.13543	1.94726	2.66086	3.65	4.95	5.8	7.2
1.03491	1.87377	2.53219	3.55	4.95	6	7.2
1.17075	2.03751	2.79208	3.75	5.15	6.45	7.5
1.20197	1.98826	2.85406	3.75	5.1	6.2	7.4
1.00235	1.70594	2.49852	3.4	4.65	5.5	7.05
0.955575	1.60918	2.42024	3.15	4.4	5.15	6.55
0.989895	1.60238	2.4485	2.9	4.2	5.05	6.45
0.989215	1.56947	2.22801	2.8	3.95	4.85	6.1
0.962359	1.52076	2.17941	2.9	4.2	5.1	6.05
1.11129	1.90989	2.69607	3.6	5.3	6.35	7.1
1.25885	2.23341	2.94152	3.9	5.45	6.6	7.25
1.24624	2.13937	2.90793	3.75	5	6.4	6.9
1.20559	2.11162	2.997	3.85	5.3	6.6	7.2
1.0495	1.84491	2.63116	3.45	4.95	5.75	6.6
0.961063	1.6327	2.29185	3	4.05	4.9	5.9
0.939771	1.51982	2.1022	2.75	3.6	4.6	5.65
0.963291	1.54578	2.13702	2.85	3.85	4.6	6
1.04987	1.80099	2.45232	3.3	4.75	5.45	6.95
1.16712	1.92847	2.66172	3.55	5.25	6.2	7.35
1.2417	1.95406	2.70394	3.5	5.05	6.25	7.35
1.24882	2.01876	2.76149	3.55	5.15	6.5	7.75
1.24612	2.05544	2.80424	3.55	5	6.35	7.75
1.28311	2.02984	2.75845	3.4	4.55	5.8	6.7
1.2002	1.87927	2.5286	3.15	4.35	5.4	6.3
1.09135	1.75406	2.36284	3.05	4.6	5.65	7.05
1.17131	1.9347	2.77757	3.5	5.2	6.75	7.85
1.20747	2.00396	2.82524	3.55	5	6.45	6.95
1.05864	1.78747	2.38258	3.1	4.3	5.35	5.95
0.985405	1.64993	2.21119	2.8	3.75	4.85	5.6
0.940878	1.55257	2.08029	2.7	3.75	4.75	5.1
0.795877	1.38525	1.80223	2.5	3.65	4.45	5
0.724885	1.2683	1.6695	2.25	3.25	4.25	5.5
0.876477	1.51432	2.13325	2.7	3.95	5.15	6.6
1.11659	1.84731	2.56847	3.3	4.85	5.95	7.3
1.13754	1.85715	2.48626	3.35	4.95	6.25	7.3
1.05344	1.75788	2.38244	3.25	4.55	5.55	6.55
0.842334	1.38495	2.01227	2.75	3.75	4.5	5.65
0.795599	1.26557	1.87523	2.5	3.7	4.65	5.8
0.96961	1.60129	2.37546	3.15	4.45	5.5	6.7
1.01938	1.68422	2.5801	3.6	5.15	6.15	7.35
1.16498	1.81158	2.67538	3.7	5.5	6.25	7.65
1.19555	1.89391	2.69415	3.6	4.95	5.8	7.2
0.991443	1.82179	2.54382	3.35	4.65	5.9	6.95
1.05781	2.01104	2.72064	3.5	5.15	6.35	7.45
1.16813	1.95061	2.60187	3.35	5	6.1	7.55
1.14459	1.78541	2.42216	3.1	4.55	5.55	7.05
1.00541	1.69631	2.31494	2.95	4.5	5.7	7.05
0.818659	1.46196	2.11649	2.8	4.2	5.4	6.8
0.744188	1.2781	1.91381	2.65	3.75	4.55	5.95
0.744342	1.24191	1.76384	2.4	3.7	4.4	5.8
0.913698	1.40623	1.92523	2.6	3.95	4.5	5.75
0.900756	1.39718	1.96496	2.65	3.95	4.7	6.05
0.792044	1.30418	1.96793	2.6	4.05	5.1	6.35
1.02979	1.75162	2.47498	3.25	4.85	6.25	7.5
1.12743	2.02659	2.86858	3.7	5.45	6.65	8.25
0.995877	1.85508	2.85134	3.65	5.45	6.95	8.65
1.0768	1.98068	3.04308	4.1	5.8	7.6	9.1
1.21471	2.19388	3.15493	4.3	6	7.3	8.7
1.08544	1.9577	2.72253	3.7	5.2	6.15	7.75
1.08348	1.84659	2.64656	3.6	5.3	6.05	7.35
1.21615	2.05422	2.90736	3.8	5.55	6.25	7.5
1.05157	1.73967	2.45651	3.3	4.65	5.5	7.05
1.04706	1.63708	2.21218	3	4.25	5.35	6.85
1.08854	1.77921	2.41128	3.1	4.3	5.15	6.45
0.947004	1.59317	2.26961	2.95	4.1	5	6.45
0.90085	1.4622	2.03929	2.75	3.75	4.65	6.1
0.787811	1.32428	1.85902	2.5	3.65	4.65	6.1
0.845443	1.60384	2.24663	2.9	4.35	5.65	7.05
0.986649	1.74605	2.39619	3.05	4.35	5.45	6.75
0.889096	1.47427	1.92184	2.5	3.6	4.75	6.25
1.06741	1.82467	2.37405	3.3	4.7	5.8	6.95
1.18421	1.98619	2.71257	3.75	5.1	6.1	7.3
1.20239	1.98863	2.81996	3.8	5	6.2	7.6
1.17776	1.96421	2.743	3.7	4.9	6.15	7.65
0.918199	1.58713	2.18365	2.9	4	5.1	7.1
0.821633	1.42604	2.10076	2.8	3.95	4.85	6.6
0.787695	1.34813	1.98262	2.6	3.85	4.85	6.25
0.983127	1.61469	2.21076	2.8	4.6	5.45	6.6
0.946781	1.56729	2.33542	3.05	4.7	5.35	6.5
0.954628	1.49822	2.14506	2.9	4.05	5	6.25
1.15493	1.78461	2.32136	3.15	4.4	5.4	6.7
1.1266	1.86575	2.54179	3.5	4.9	5.7	7
1.03765	1.76769	2.48449	3.45	5	6.15	7.4
0.932982	1.65753	2.37291	3.35	4.9	6.15	7.25
0.919168	1.57787	2.23509	3.25	4.5	5.2	6.25
0.890201	1.50099	2.13581	2.95	4.2	4.85	6.1
0.894437	1.53006	2.17649	2.85	4.45	5.45	6.55
0.920294	1.58204	2.33761	3.3	5	5.9	6.6
1.00529	1.68315	2.4435	3.65	5.1	5.7	6.5
1.03984	1.63959	2.18674	3.25	4.5	5.3	6.5
1.06476	1.68244	2.23166	3.15	4.65	5.75	6.95
1.07331	1.69446	2.30381	3.1	4.6	5.7	7
0.988374	1.66111	2.29815	2.95	4.15	5.45	6.85
0.964354	1.65776	2.33289	3.05	4.3	5.7	6.7
0.925257	1.50435	2.08945	2.9	4.25	5.5	6.45
0.924489	1.54932	2.10521	2.85	4.15	4.9	5.75
0.778345	1.33656	1.88796	2.55	3.55	3.95	4.75
0.64483	1.08714	1.56748	2.15	3.2	4	5.25
0.697957	1.22778	1.75708	2.35	3.85	5.1	6.65
0.814761	1.45888	2.06011	2.8	4.35	5.65	7.15
0.893872	1.61399	2.24782	3.05	4.7	5.95	7.25
0.942647	1.60539	2.24789	3.1	4.75	5.7	7.05
0.956602	1.5119	2.10685	3.05	4.25	4.95	6.75
0.981093	1.56422	2.17452	2.95	4.1	5.1	6.75
1.11833	1.78155	2.47989	3.15	4.65	5.65	6.5
1.11509	1.72289	2.4542	3.1	4.55	5.35	6.35
1.00837	1.59629	2.31616	3.1	4.55	5.45	6.75
1.0239	1.66175	2.29624	3.3	4.7	5.75	6.9
1.06981	1.76066	2.32446	3.15	4.25	5.2	6.45
0.997295	1.7147	2.40265	3.1	4.3	5.45	6.85
1.20075	1.97083	2.74818	3.55	5	6.3	7.45
1.31397	2.12423	2.79732	3.7	5.45	6.75	8.05
1.25487	1.92938	2.65839	3.6	5.4	6.8	8.35
1.15185	1.77134	2.53213	3.5	5	6.05	7.55
0.977067	1.65929	2.39573	3.35	4.7	5.4	6.75
0.942546	1.63817	2.35495	3.3	4.75	5.5	6.5
0.98797	1.67265	2.3905	3.45	5	5.95	7.2
1.18798	1.99659	2.9153	4.05	5.8	7.15	8.5
1.26019	2.21533	3.33692	4.35	6.25	7.55	8.6
1.03687	1.8553	2.85917	3.7	5.3	6.3	7.75
0.921031	1.57959	2.3658	3.1	4.2	5.4	6.9
0.90152	1.51713	2.23126	2.95	4.05	5.15	6.45
0.876982	1.4687	2.23858	3	4.5	5.5	6.65
0.898514	1.50601	2.25655	3.1	4.55	5.55	6.4
0.928992	1.65723	2.33664	3.1	4.45	5.5	6.6
1.08615	1.81915	2.53423	3.3	4.9	5.9	7.4
1.12238	1.73527	2.46627	3.2	4.8	5.5	7.1
1.00802	1.60486	2.3471	3	4.35	5.2	6.65
1.0162	1.67206	2.28682	3.1	4.25	5.2	6.2
1.05035	1.72191	2.29119	3.2	4.5	5.45	6.4
0.994043	1.63469	2.29556	3.15	4.85	6.15	7.25
0.936249	1.56544	2.35626	3.3	4.85	5.75	6.8
0.909602	1.4438	2.12571	3.15	4.35	4.95	5.95
0.944564	1.45238	1.94459	2.75	4.05	5.15	6.25
1.2186	1.98647	2.67829	3.4	5.05	6.25	7.45
1.3616	2.32907	3.23279	4.05	5.75	6.85	7.9
1.18196	2.09233	2.99838	4	5.6	6.6	7.4
0.987841	1.81184	2.62567	3.6	5.05	6.1	6.9
0.821414	1.49912	2.22005	3.15	4.3	5.55	6.8
0.860451	1.49236	2.18404	3.15	4.35	5.5	6.7
0.92111	1.55831	2.23708	3.05	4.4	5.3	6.6
0.938199	1.53263	2.20173	3.05	4.2	5.15	6.65
1.01729	1.60768	2.25796	3.2	4.4	5.85	7.45
1.0388	1.67129	2.35586	3.3	4.7	6.25	7.95
1.21575	1.99369	2.66083	3.65	5.2	6.4	7.85
1.37304	2.20201	2.84928	3.8	5.35	6.4	8.1
1.24616	1.93935	2.72106	3.55	4.9	5.85	7.6
0.991452	1.73579	2.52875	3.35	4.65	5.5	6.75
0.842058	1.54561	2.19099	3	4.25	4.95	6.1
0.789805	1.35865	1.93211	2.7	3.8	4.7	6.2
0.743017	1.27443	1.85488	2.65	3.6	4.85	6.15
0.820547	1.40124	2.0605	2.8	3.95	5.2	6.2
1.02466	1.75655	2.52466	3.35	4.9	5.9	7.1
1.21283	1.94007	2.79746	3.7	5.2	5.9	7.05
1.15153	1.96233	2.71806	3.45	4.75	5.6	6.75
1.11986	1.98858	2.75078	3.55	4.9	6.1	7.45
1.21808	1.95499	2.70083	3.6	4.8	5.95	7.25
1.09674	1.7558	2.30019	3.05	4.1	5.05	6.4
0.915137	1.52109	2.18447	2.9	4	4.9	6.15
0.945882	1.59906	2.39767	3.2	4.45	5.6	6.95
1.17612	1.97751	2.84717	3.8	5.4	6.6	8.25
1.28381	2.20509	3.18803	4.2	5.75	7.05	8.6
1.09136	1.98951	2.97291	3.85	5.15	6.65	8.25
1.01272	1.77282	2.55613	3.4	4.75	6.3	8
1.12247	1.91726	2.58012	3.5	5	6.55	8.3
1.03295	1.84001	2.48944	3.4	4.95	5.95	7.75
0.907242	1.63512	2.3147	3.15	4.55	5.15	6.9
1.01156	1.65993	2.44611	3.25	4.8	5.65	7
1.08405	1.7191	2.50331	3.3	5.1	6.1	7.45
0.984524	1.6786	2.39224	3.35	5.1	6	7.9
1.09188	1.76069	2.47595	3.6	5.35	6.3	7.45
1.12019	1.75162	2.47176	3.5	5.2	5.95	6.3
1.06904	1.71518	2.40494	3.3	4.75	5.75	6.95
1.17615	1.9311	2.71099	3.7	5.15	6.6	8.05
1.19158	2.00521	2.83298	3.9	5.3	6.45	7.6
1.1988	2.04428	2.83242	3.85	5.25	6.25	7.45
1.15013	2.01538	2.82586	3.9	5.55	6.45	7.5
1.14274	1.95529	2.80626	3.95	5.55	6.55	7.55
1.1534	1.97303	2.82843	3.95	5.5	6.75	7.75
1.08613	1.92453	2.81424	3.9	5.35	6.65	8.1
1.10849	1.87527	2.75641	3.75	5.15	6.5	8.4
1.05129	1.80911	2.6314	3.5	4.85	6.25	7.7
0.86264	1.59179	2.29805	3	4.35	5.8	7.1
0.822477	1.39174	1.9878	2.7	4.2	5.3	6.45
0.820476	1.39745	1.95823	2.8	4.25	4.95	5.75
0.894019	1.60723	2.23604	3.05	4.4	4.9	5.95
0.925564	1.60461	2.33294	3.2	4.6	5.25	6.5
0.754418	1.2627	1.87917	2.7	3.95	4.85	6.35
0.826004	1.30144	1.7581	2.5	3.55	4.4	6
0.923341	1.41875	1.89511	2.65	3.75	4.5	6.15
0.88837	1.39004	1.98904	2.8	4	4.7	6.2
1.0043	1.62049	2.26295	3.15	4.55	5.45	6.35
1.03327	1.70779	2.29157	3.1	4.35	5.35	6.05
0.911842	1.53499	2.0907	2.9	3.9	4.75	5.7
0.916219	1.54716	2.12989	3.05	4.3	5.1	6.05
0.896533	1.54001	2.15307	3	4.45	5.1	5.7
0.720363	1.29783	1.94316	2.65	3.95	4.85	5.6
0.914852	1.55769	2.32582	3.15	4.3	5.5	6.55
1.03681	1.68748	2.46849	3.35	4.4	5.3	6.45
0.847068	1.52387	2.16599	2.85	3.9	4.6	5.8
0.871738	1.62521	2.24468	3	4.25	5.4	6.45
0.991037	1.67007	2.34249	3.35	4.9	6.05	6.9
0.855564	1.43251	2.08014	2.95	4.45	5.3	5.95
0.733505	1.30744	1.87586	2.55	3.95	4.85	5.6
0.900677	1.58774	2.19485	2.9	4.5	5.5	6.2
1.08291	1.90386	2.66877	3.55	5.25	6.3	7.4
1.21681	2.13297	2.91425	3.9	5.6	6.45	7.75
1.21238	1.99233	2.62873	3.55	5.2	6.1	7.25
1.11052	1.76193	2.48489	3.3	4.65	5.6	7.3
1.02485	1.72186	2.47137	3.25	4.55	5.4	7.15
1.06619	1.80151	2.33366	3.15	4.55	5.4	6.7
1.05805	1.82977	2.35439	3.1	4.55	5.7	7.05
0.956379	1.67454	2.32648	3.2	4.65	5.9	7.05
1.00307	1.74283	2.52519	3.35	4.65	5.6	6.8
1.24712	2.21104	3.15448	3.85	5.65	6.6	7.95
1.2954	2.174	3.01095	3.8	5.6	6.55	7.75
1.17777	1.87486	2.61313	3.5	4.85	5.85	7.1
1.31251	2.12936	2.98962	4	5.5	6.5	7.5
1.29128	2.2538	3.08579	4.05	5.55	6.45	7.75
1.24262	2.24263	3.04984	3.9	5.2	6.35	7.8
1.29753	2.19663	3.0978	4	5.35	6.55	7.75
1.22012	1.9397	2.82557	3.75	5.15	6.05	7.3
1.12957	1.77416	2.50562	3.25	4.75	5.65	6.75
1.03594	1.80172	2.40219	3.3	4.75	5.5	6.55
0.913059	1.55379	2.07929	3.1	4.1	4.7	6.35
0.993816	1.50703	1.99527	2.85	3.75	4.6	6.4
1.10455	1.73953	2.3438	3.25	4.45	5.4	6.7
0.982056	1.65845	2.32974	3.2	4.65	5.75	6.9
0.864742	1.60908	2.24474	3	4.4	5.25	6.1
0.722657	1.3225	1.80819	2.45	3.65	4.35	5.35
0.743998	1.22602	1.61166	2.2	3.5	4.5	5.65
0.92422	1.54542	2.14305	2.85	4.5	5.35	6.35
1.04445	1.72497	2.46261	3.15	4.8	5.7	6.95
1.13267	1.84311	2.53527	3.25	4.75	6.1	7.3
1.12273	1.86274	2.73499	3.45	4.75	6.1	7.65
1.14064	1.95367	2.91921	3.65	5.15	6.3	7.9
1.119	1.9532	2.80053	3.7	5.4	6.85	8.25
0.950803	1.59638	2.37363	3.3	4.75	6.1	7.6
1.01861	1.61999	2.3092	3.25	4.6	5.35	6.7
1.10662	1.74044	2.34014	3.2	4.5	5.25	6.4
0.948375	1.51538	2.04262	2.8	4.05	5.05	6.15
0.931569	1.40187	1.98558	2.75	3.9	4.8	6
0.981677	1.49692	2.07078	2.85	4.2	5.15	6.35
1.1081	1.86251	2.6057	3.6	5.15	5.85	6.65
1.17292	1.95398	2.76558	3.8	5.3	6	6.9
1.16735	1.81054	2.59585	3.65	5.35	6.4	8
1.08943	1.73478	2.49645	3.6	5.35	6.35	7.9
1.06029	1.74522	2.30129	3.3	4.95	6	6.95
1.19938	1.96749	2.62619	3.55	5.25	6.4	7.25
1.10183	1.91568	2.6799	3.55	5.05	6.15	7.15
0.906641	1.61081	2.20297	3	4.25	5.2	6.35
0.754607	1.33303	1.88075	2.55	3.6	4.4	5.8
0.778719	1.26564	1.76451	2.5	3.6	4.2	5.15
0.728196	1.1264	1.51406	2.2	3.25	3.8	5
0.778184	1.24329	1.75148	2.25	3.25	4.05	5.75
0.946596	1.49554	2.19082	2.85	4.15	5.05	6.45
0.848226	1.46676	2.27633	3.2	4.55	5.25	6.7
0.760538	1.42356	2.11304	3	4.45	5.2	6.75
0.729624	1.3315	1.94936	2.7	4.15	5.1	6.7
0.796417	1.40482	2.00815	2.8	4.3	5.35	6.55
0.93	1.65803	2.21959	3	4.6	5.5	6.8
1.21162	2.03824	2.73711	3.6	5.35	6.25	8.1
1.31276	2.16874	3.02252	4.05	5.8	7.05	8.45
1.05712	1.80095	2.56418	3.55	4.85	6.2	7.7
0.793566	1.37486	2.01061	2.75	4.1	5.3	6.95
0.712625	1.2284	1.78155	2.4	3.85	4.95	6.3
0.809406	1.34199	1.86706	2.7	4.15	5	6.25
0.906769	1.59947	2.22377	3.25	4.75	5.35	6.55
0.880997	1.59262	2.33716	3.4	4.9	5.3	6.7
0.898542	1.58705	2.43164	3.4	5.05	5.65	6.75
1.12102	1.87923	2.67767	3.55	5.1	5.95	6.9
1.23425	1.96313	2.76442	3.65	5.05	6.15	7.25
1.04015	1.72895	2.48762	3.45	5.25	6.45	7.6
0.784054	1.44637	2.10583	3	4.7	5.55	7.3
0.967325	1.59928	2.28362	3.2	4.45	5.1	7
1.02987	1.6588	2.30879	3.25	4.5	5.3	6.65
0.827258	1.4687	2.01477	2.85	3.95	4.75	6.25
0.882114	1.45496	1.98954	2.85	4.2	5	6.95
0.944677	1.50246	2.16911	3.1	4.6	5.8	7.6
0.906182	1.45496	2.15916	3.15	4.5	5.65	7.35
0.955712	1.48802	2.18922	3.2	4.7	5.55	7.25
1.07192	1.64583	2.29659	3.35	4.95	5.65	6.75
1.04465	1.60191	2.17771	3.25	4.75	5.45	6.3
0.905249	1.50974	2.0679	2.95	4.3	5.25	6.7
1.00113	1.64077	2.21277	2.9	4.3	5.4	7.1
1.29609	1.97043	2.68143	3.45	5.05	6.1	7.05
1.15103	1.84781	2.51513	3.3	4.8	5.8	6.65
0.933733	1.60027	2.28979	3.1	4.5	5.6	6.9
1.11386	1.91666	2.76643	3.7	5.4	6.6	7.85
1.37694	2.38688	3.19319	4.15	6.05	7.3	8.55
1.26174	2.14309	2.80845	3.75	5.25	6.8	8.25
0.979589	1.68818	2.32989	3.1	4.25	5.7	7.4
1.0171	1.69429	2.35997	3	4.3	5.35	7.5
1.03846	1.68644	2.30536	3	4.45	5.6	7.55
0.909983	1.53955	2.05688	2.85	4.3	5.4	6.45
0.941476	1.52168	2.06745	2.9	4.35	5.25	6.15
0.916036	1.53465	2.13426	2.9	4.3	5.15	6.25
0.86578	1.49526	2.09533	2.9	4.2	5.15	6.45
0.964936	1.58176	2.18398	3.05	4.25	5.05	6.05
0.851331	1.3891	1.87828	2.7	3.6	4.3	5.45
0.693901	1.10414	1.57418	2.25	3.35	4.25	5.4
0.676142	1.12291	1.61333	2.25	3.55	4.4	5.25
0.650371	1.16223	1.63398	2.25	3.2	3.95	5.15
0.697825	1.21611	1.78272	2.35	3.5	4.3	5.5
0.7674	1.26801	1.84144	2.55	3.7	4.8	6.5
0.797984	1.33793	1.99804	2.7	3.75	4.85	6.95
0.95877	1.55412	2.3186	3.1	4.45	5.3	6.65
1.0587	1.64207	2.26656	3.15	4.7	5.35	6.35
0.948102	1.51775	2.1098	3	4.35	4.85	5.85
0.797517	1.33818	1.8312	2.65	3.7	4.2	5.1
0.788387	1.2917	1.71435	2.35	3.45	3.9	5.05
0.798992	1.24828	1.75607	2.4	3.55	4	5.15
0.778354	1.22314	1.74917	2.45	3.6	4.25	5.25
0.736024	1.19168	1.73747	2.4	3.5	4.15	5.2
0.775215	1.24493	1.80779	2.4	3.6	4.3	5.55
0.965464	1.56513	2.15388	2.8	4.3	5.45	6.9
1.12142	1.84335	2.57539	3.35	5	6.3	8
1.10936	1.92305	2.74652	3.55	5.2	6.3	7.9
1.0004	1.75441	2.40893	3.15	4.6	5.95	7.25
1.00221	1.60946	2.2323	3.05	4.2	5.65	6.95
0.949546	1.61551	2.19672	3.2	4.35	5.55	6.75
1.069	1.85088	2.50169	3.45	5	6	7
1.19123	1.94539	2.70092	3.5	5.25	6.05	7.15
1.04188	1.75064	2.39127	3.2	4.75	5.65	6.7
1.02349	1.60202	2.23395	3	4.25	5.15	6.25
1.02197	1.63532	2.23497	2.9	4.2	5.15	6.45
0.931873	1.58835	2.20826	2.95	4.6	5.75	6.8
0.95611	1.55454	2.23932	3.1	4.85	5.7	6.55
0.892858	1.51146	2.1322	2.9	4.35	5.05	6.05
0.837539	1.36988	1.93655	2.6	3.65	4.55	5.65
0.997384	1.52927	2.18777	3	4.1	5.2	6.55
0.997426	1.57411	2.23533	3.1	4.25	5.6	7.25
0.960039	1.55649	2.165	2.95	4.25	5.5	7.15
0.969315	1.66239	2.19988	3	4.5	5.55	6.75
0.876928	1.66877	2.21392	3	4.45	5.55	6.8
1.1537	1.99886	2.64408	3.5	5.05	6.25	7.8
1.21184	1.99199	2.65021	3.55	5.05	6.05	7.4
0.986548	1.7495	2.48875	3.25	4.65	5.65	7.15
1.00958	1.80398	2.53315	3.2	4.65	5.65	7
0.997465	1.69983	2.3602	3	4.35	5.15	6.05
1.0185	1.7166	2.4174	3.15	4.6	5.5	6.2
0.888868	1.5218	2.23445	3.1	4.55	5.4	6.2
0.940053	1.60533	2.30818	3.15	4.75	5.45	6.15
1.07988	1.80609	2.48505	3.25	4.95	5.65	6.6
1.00142	1.64854	2.29677	3.2	4.55	5.3	6.4
0.760157	1.27702	1.79933	2.6	3.6	4.45	5.7
0.538441	1.02886	1.4907	2.05	3.05	4	5.3
0.688312	1.39408	1.89384	2.55	3.75	4.5	5.55
0.881195	1.62206	2.15856	2.85	3.9	4.75	6.3
0.903567	1.56134	2.1956	3	4.15	5.4	7.25
0.91071	1.6826	2.4939	3.5	4.9	6	7.7
0.912782	1.76454	2.612	3.5	4.75	5.85	7.35
1.12028	1.94525	2.75726	3.5	4.7	6.2	7.55
1.30449	2.10065	2.91767	3.7	5.1	6.35	7.3
1.22654	1.97689	2.74917	3.5	5.05	5.95	7
1.29848	2.15358	3.03814	3.95	5.8	6.7	7.95
1.27893	2.1364	3.04774	4	6.25	7	7.95
1.07196	1.85971	2.64524	3.45	5.45	6.4	7.2
0.994895	1.69011	2.42679	3.3	4.8	5.8	6.5
1.0622	1.78884	2.4428	3.25	4.5	5.4	6.4
1.02191	1.83373	2.50566	3.3	4.5	5.55	6.55
1.00881	1.76877	2.55784	3.4	4.65	5.7	6.75
1.00014	1.74524	2.50522	3.35	4.5	5.5	6.75
0.909451	1.60937	2.25852	3.05	4.3	5.4	6.3
0.950192	1.68029	2.22334	3	4.5	5.55	6.45
0.919162	1.68321	2.3475	3.2	4.7	5.75	6.85
0.881832	1.62954	2.36654	3.25	4.8	5.8	6.55
0.931043	1.66444	2.28159	3.2	4.7	5.6	6.3
0.990547	1.72081	2.42161	3.25	4.75	5.75	6.95
0.999046	1.74688	2.47052	3.25	4.7	5.65	6.9
0.916314	1.59775	2.1912	2.95	4.1	5.1	6.6
0.89332	1.46108	2.11983	2.8	3.95	4.9	6.6
0.904545	1.47134	2.18347	2.85	3.9	4.7	6.05
0.881691	1.49987	2.16368	2.85	4.2	5.05	6.5
0.916594	1.61612	2.22916	2.95	4.65	5.8	7.1
0.962978	1.67146	2.2616	3.05	4.55	5.85	7.15
1.0388	1.67333	2.38714	3.25	4.7	5.8	6.95
1.05808	1.74446	2.47356	3.3	4.9	5.75	6.7
1.02045	1.89204	2.56962	3.3	4.9	5.85	7.05
1.00719	1.81931	2.48585	3.2	4.45	5.4	6.7
0.876889	1.48785	2.12896	2.8	3.85	4.7	6.05
0.84365	1.40105	2.01499	2.7	3.95	4.8	5.9
0.835045	1.34044	1.96417	2.75	4.05	4.75	5.75
0.727901	1.19295	1.70553	2.45	3.6	4.15	5.1
0.711202	1.17495	1.59068	2.25	3.35	3.8	4.85
0.697613	1.10989	1.65624	2.3	3.45	3.95	4.95
0.707543	1.17451	1.72202	2.45	3.6	4.1	4.8
0.829631	1.35127	1.79217	2.6	3.75	4.35	5.35
1.00446	1.55841	1.99821	2.95	4.1	4.8	5.85
0.963349	1.51603	2.05424	3	4.15	5.05	5.9
0.967055	1.51439	2.12029	2.95	4.2	5.2	6.5
1.07914	1.79237	2.49115	3.3	4.55	5.5	7.25
0.967961	1.68388	2.44379	3.25	4.85	6	7.35
0.934115	1.52189	2.12503	3	4.65	5.8	6.6
0.849783	1.38264	1.89225	2.7	3.95	4.95	5.8
0.817607	1.35096	1.85998	2.65	4.1	5.15	6.1
0.90188	1.49376	2.05324	2.95	4.9	5.9	6.9
0.95662	1.6333	2.31749	3.3	5.2	6	7.2
1.0369	1.72231	2.52352	3.7	5.1	5.95	7.45
1.10126	1.76652	2.55797	3.7	5.05	5.8	7.7
1.11785	1.85467	2.55272	3.6	5.45	6.45	7.8
1.0722	1.79458	2.47767	3.5	5.35	6.35	7.05
0.897943	1.41098	1.93848	2.7	4.1	4.65	5.65
0.695231	1.20231	1.64993	2.3	3.75	4.4	5.6
0.837585	1.47567	1.94123	2.65	4.05	4.65	5.75
0.861259	1.49867	1.99791	2.65	4	4.7	5.95
0.878797	1.48281	2.07934	2.75	4.25	5.25	6.45
1.20481	1.83792	2.6264	3.45	5.25	6.2	6.95
1.19632	1.86574	2.7348	3.6	5.55	6.3	7.35
0.98195	1.68873	2.32987	3.2	4.9	5.75	7.35
1.04588	1.79143	2.38578	3.35	4.8	5.8	7.25
1.04653	1.76281	2.38746	3.3	4.7	5.65	6.85
0.985884	1.71649	2.35155	3.2	4.75	5.85	6.8
1.04635	1.79495	2.51363	3.4	5.05	6.2	7.05
1.06313	1.86592	2.69327	3.7	5.4	6.4	7.65
1.08169	1.89035	2.70616	3.6	5.35	6.35	7.85
0.944705	1.61723	2.30977	3.05	4.75	5.75	7
0.735501	1.29786	1.94109	2.8	4.1	4.9	5.85
0.692481	1.1622	1.72934	2.5	3.6	4.5	5.7
0.794998	1.23065	1.77009	2.55	3.6	4.4	5.55
0.809372	1.25291	1.79252	2.6	3.7	4.15	5.2
0.709418	1.1909	1.73712	2.45	3.65	4.4	5.55
0.79203	1.29396	1.92349	2.65	3.9	4.8	5.55
0.795544	1.29907	1.98078	2.8	4.05	4.95	5.7
0.846378	1.48842	2.16258	3	4.25	5.05	5.95
0.904405	1.57241	2.19659	3.05	4.35	5	5.6
0.738785	1.31157	1.90739	2.75	4.05	4.8	5.5
0.815856	1.37995	1.96661	2.75	4.1	4.75	5.4
0.955663	1.52774	2.11875	2.8	4	4.5	5.35
0.872191	1.4601	2.05545	2.75	3.95	4.7	5.75
0.882097	1.55444	2.14007	3	4.25	5.2	5.95
1.03539	1.72085	2.31297	3.2	4.5	5.35	5.8
0.927827	1.52471	2.01629	2.8	4.05	4.85	5.4
0.759614	1.27764	1.65344	2.35	3.35	4.25	4.8
0.691229	1.14465	1.53019	2.1	3.15	4.1	4.8
0.701303	1.18213	1.69973	2.25	3.45	4.3	5.2
0.892999	1.43934	2.0637	2.75	3.9	4.55	5.1
0.834944	1.31138	1.83197	2.6	3.55	4	4.95
0.638649	0.98145	1.36916	2	2.85	3.35	4.5
0.590309	0.907794	1.1964	1.65	2.5	3.1	4.1
0.556752	0.909289	1.13083	1.6	2.6	3.2	4.05
0.603626	0.996069	1.30584	1.85	2.95	3.5	4.4
0.702575	1.17955	1.63521	2.35	3.35	3.9	5.15
0.764399	1.27671	1.69179	2.45	3.55	4.15	5.05
0.730779	1.19661	1.55397	2.3	3.45	4	4.9
0.693777	1.21499	1.81687	2.6	3.7	4.4	5.4
[truncated: 9,067 more rows]

## Sheet: deathvalleysmooth
1.08126	1.4282	1.96992	2.85	4.05	4.75	5.95
1.28124	1.68939	2.22428	3.15	4.15	4.8	6
1.23847	1.65975	2.26849	3.25	4	4.75	5.85
1.15838	1.68628	2.23856	3.3	4.2	5.1	6.2
1.7664	2.17872	2.65391	3.65	4.85	5.9	7
1.50162	1.70925	2.91909	3.75	5.1	6.2	7.05
0.643772	0.821259	3.14523	3.9	5.25	5.95	6.75
0.501151	0.715311	3.19272	3.9	5.25	5.8	6.5
0.50635	0.774155	3.30824	3.95	5.6	6.45	7.3
0.774634	1.56829	3.42782	4	5.75	6.55	7.9
1.07127	2.35169	3.2109	3.85	5.2	6	7.25
1.10781	1.9944	3.01035	3.8	5.05	5.75	6.85
0.886391	1.58949	2.94248	3.65	4.95	5.7	6.95
0.984889	2.23685	3.45498	4.05	5.1	5.7	6.75
1.12263	2.33382	3.35479	3.9	4.95	5.5	6.5
1.42958	2.31371	3.10762	3.55	4.65	5.35	6.5
1.89884	2.85469	3.48811	4.05	5.35	6.1	7.3
1.35435	2.53855	3.44461	4.1	5.25	6.2	7.2
0.826124	2.14623	3.46052	4.35	5.5	6.5	7.85
0.810726	2.10123	3.54957	4.6	5.9	6.95	8.85
0.798082	2.34554	3.89406	4.75	6.15	7.45	9.2
0.696752	2.09542	3.8534	4.55	5.95	7.15	8.65
0.56388	1.71988	3.46189	4.1	5.3	6.1	7.25
0.573199	1.8777	3.50026	4.1	5.35	6.1	7.25
0.589378	1.83084	3.50623	4.05	5.35	6.25	7.4
0.597352	1.92903	3.71336	4.2	5.55	6.6	7.75
0.632212	2.15791	3.87662	4.45	5.7	6.85	8.05
0.598323	1.95995	3.50417	4.1	5.3	6.2	7.2
0.534132	1.71521	3.22473	3.8	4.95	5.55	6.6
0.481798	1.52289	2.95787	3.5	4.55	5.1	6.25
0.443092	1.47817	2.71663	3.2	4.2	4.85	5.6
0.467986	1.55039	2.59314	3	3.85	4.65	5.2
0.616146	1.95706	3.13996	3.55	4.8	5.55	6.9
0.66074	2.11118	3.70675	4.25	5.7	6.5	8.4
0.653827	2.10425	4.03785	4.65	5.95	7.25	9.15
0.653236	2.12661	4.08976	4.65	6.1	7.7	9.6
0.6585	2.1686	4.12034	4.75	6.15	7.35	8.75
0.670395	2.32094	4.04339	4.7	6	6.75	7.85
0.591145	2.25795	3.53004	4.05	5.45	6.35	7.6
0.587745	2.14939	3.35585	3.9	5.45	6.5	7.75
0.563663	1.86382	3.27228	3.8	5.15	5.85	6.95
0.549719	1.82452	3.36852	3.85	4.95	5.55	6.65
0.556984	1.93295	3.32809	3.9	4.85	5.6	6.65
0.544726	1.88058	3.24052	3.9	4.9	5.75	7
0.517742	1.80244	3.19049	3.75	5.05	6.15	7.45
0.601635	2.08169	3.52389	4.1	5.55	6.55	7.6
0.60241	1.91701	3.27511	3.85	5.35	5.95	7.15
0.619326	2.00826	3.4528	4	5.5	5.95	7.05
0.672975	2.31745	3.86402	4.45	5.8	6.35	7.65
0.574171	1.80693	3.1493	3.65	4.85	5.8	7.1
0.557653	1.6768	2.85092	3.3	4.55	5.6	6.9
0.641148	2.16223	3.46404	3.9	5.25	6.2	7.5
0.67812	2.27309	3.86065	4.35	5.9	6.8	7.75
0.653253	2.0324	3.70751	4.3	5.9	6.75	7.65
0.545583	1.68161	3.28394	3.9	5.25	6.2	7.05
0.505757	1.60993	3.22096	3.85	4.8	5.6	6.75
0.479201	1.47574	3.10437	3.7	4.55	5.2	6.45
0.458967	1.31708	2.95815	3.55	4.75	5.45	6.4
0.516572	1.51276	3.23375	3.9	5.2	5.8	6.9
0.605774	1.80372	3.56364	4.2	5.15	6.1	7.65
0.787228	2.56691	4.16899	4.85	5.85	6.8	8.55
0.800831	2.66954	4.18093	4.85	5.9	6.55	8.4
0.682876	2.20496	4.02089	4.65	5.55	6.25	8.25
0.691614	2.12141	3.90352	4.6	5.9	6.35	8.35
0.67219	1.90136	3.60202	4.35	5.85	6.3	8.05
0.68945	1.96247	3.61193	4.35	5.55	6.1	7.45
0.805871	2.37396	3.92513	4.7	5.6	6.15	7.65
0.770002	2.3014	3.97417	4.7	5.6	6.6	8.6
0.781701	2.10434	3.73408	4.45	5.85	7.15	8.95
0.776289	1.94887	3.50261	4.25	5.45	6.35	7.5
0.723054	2.02172	3.28317	3.95	4.7	5.1	6.15
0.817243	2.38985	3.48757	4.25	5.15	5.55	6.75
0.767683	2.27875	3.62059	4.35	5.3	5.8	6.9
0.620003	1.90033	3.05059	3.65	4.4	4.9	5.95
0.610382	1.84636	2.61654	3.1	3.8	4.4	5.65
0.637685	1.84657	2.81532	3.2	4.05	4.8	6
0.581494	1.56525	2.94342	3.45	4.25	4.8	5.65
0.49556	1.46962	2.86741	3.5	4.3	4.6	5.65
0.442979	1.41512	2.67364	3.25	4	4.45	5.5
0.647143	1.92971	3.2723	3.85	4.9	5.55	6.95
0.925777	2.78868	4.28144	5.05	6.45	7.3	8.75
0.873695	2.50698	4.26184	5.1	6.45	7.15	8.3
0.853321	2.28249	4.24771	5.1	6.45	7.05	8.15
0.84069	2.31607	4.2564	5.1	6.6	7.5	9
0.721181	2.07539	4.27471	5.1	6.65	7.7	9.6
0.678552	1.95359	4.13631	4.95	6.3	7.55	9.15
0.699275	1.902	4.12871	4.9	6.2	7.7	9.2
0.698919	1.95746	4.44619	5.2	6.6	7.85	9.3
0.681412	1.97022	4.24469	4.95	6.35	7.15	8.7
0.670935	1.82893	3.73732	4.45	5.65	6.2	7.75
0.616777	1.68001	3.69531	4.35	5.5	6.15	7.2
0.571482	1.54305	3.43263	3.95	4.95	5.7	6.75
0.560249	1.47704	3.0443	3.55	4.3	5.05	6.65
0.637205	1.89313	3.96572	4.7	5.75	6.7	8
0.71001	2.17805	4.30802	5.1	6.4	7.3	8.65
0.793275	2.13775	3.97626	4.65	6.1	6.8	8.55
0.771297	1.99293	3.85148	4.6	6	6.75	8.65
0.745287	2.0813	4.07283	4.8	5.95	6.8	8.7
0.763154	2.10879	4.17745	4.85	6.1	6.9	8.8
0.676344	1.91818	3.96736	4.7	6.15	6.85	8.7
0.59543	1.8485	3.82127	4.5	5.95	6.8	8.15
0.563996	1.76789	3.69271	4.3	5.4	6.2	7.1
0.513632	1.57084	3.25196	3.85	4.65	5.2	6.3
0.548385	1.53658	2.98712	3.6	4.75	5.4	6.85
0.571431	1.53633	2.97685	3.55	4.85	5.4	6.55
0.482117	1.36074	2.66954	3.25	4.25	4.65	5.4
0.499552	1.3649	2.82096	3.45	4.55	5	5.7
0.497052	1.29876	2.70402	3.3	4.35	4.85	5.6
0.478183	1.35599	2.58192	3.2	4.05	4.5	5.5
0.496259	1.62164	2.95356	3.55	4.65	5.2	6.65
0.497739	1.71306	3.19263	3.7	5.05	5.85	7.35
0.501908	1.53281	3.24482	3.75	5.1	5.6	6.8
0.54428	1.53651	3.19554	3.8	5.05	5.3	6.45
0.560028	1.58984	3.37901	4.05	5.4	6.05	7.15
0.518519	1.40689	3.45301	4.1	5.45	6.4	7.35
0.631641	1.71756	3.743	4.45	5.85	6.65	7.75
0.648528	1.86238	3.80977	4.5	5.95	6.55	7.8
0.573787	1.76226	3.55061	4.2	5.55	6.15	7.5
0.640181	2.02076	3.8518	4.6	6.05	6.8	8.2
0.646022	2.04617	3.90343	4.65	6	6.85	8.35
0.57194	1.76374	3.71297	4.4	5.8	6.65	8.4
0.563151	1.79805	3.7429	4.4	6	6.95	9.25
0.643525	2.07014	3.89064	4.5	6.5	7.7	9.85
0.584888	1.75424	3.56378	4.15	6	7	8.8
0.555565	1.48217	3.36188	4	5.3	6.15	7.65
0.591535	1.56044	3.51923	4.2	5.3	6.05	7.3
0.548597	1.54114	3.33447	3.9	5	5.65	7.15
0.596944	1.62885	3.61311	4.1	5.25	6.2	7.6
0.590133	1.61997	3.66525	4.25	5.45	6.55	7.8
0.485491	1.37548	3.112	3.75	5.05	5.8	7.05
0.572823	1.62026	3.32936	4	5.1	5.75	7.25
0.645437	1.76066	3.6473	4.3	5.4	6	7.6
0.547521	1.6151	3.33196	3.95	5.2	5.9	7.25
0.501258	1.63326	3.0579	3.7	4.95	6	7.15
0.488643	1.56381	3.1647	3.75	4.8	5.6	6.9
0.467409	1.44385	3.19247	3.75	4.7	5.35	6.7
0.486396	1.42609	2.91329	3.5	4.6	5.25	6.65
0.459753	1.35543	2.62515	3.15	4.25	4.8	6.5
0.412755	1.22311	2.43905	2.95	3.8	4.45	5.95
0.461693	1.30921	2.66593	3.25	3.95	4.4	5.35
0.467582	1.31543	2.68528	3.25	4	4.3	5.05
0.435529	1.2169	2.31374	2.8	3.75	4.2	5.1
0.389938	1.03181	2.38734	2.9	3.85	4.4	5.35
0.336526	0.921512	2.36128	2.9	3.65	4.25	5.75
0.429522	1.32738	2.62179	3.2	4.2	4.8	6.35
0.583489	1.75752	3.27947	4	5.25	6.05	7.3
0.561478	1.63399	3.27434	4	5.1	5.8	7.15
0.53971	1.63838	3.10619	3.75	4.8	5.35	6.6
0.606243	1.7648	3.08692	3.7	4.9	5.7	7.35
0.535993	1.48182	2.86601	3.45	4.6	5.5	7.45
0.515541	1.48061	3.06313	3.7	4.95	5.5	7.25
0.548616	1.65416	3.41388	4.05	5.55	6.25	7.9
0.574363	1.89955	3.51781	4.1	5.65	6.8	8.2
0.584238	2.09375	3.64328	4.2	5.55	6.45	7.8
0.525357	1.8648	3.38218	3.95	5.05	5.75	7.1
0.509198	1.52607	3.06282	3.6	4.65	5.25	6.3
0.435867	1.18746	2.52393	3	4	4.45	5.5
0.483277	1.41357	2.69781	3.3	4.1	4.85	6.05
0.591343	1.81924	3.43529	4.15	5.25	6	7.1
0.593092	1.9513	3.642	4.35	5.9	6.25	7.1
0.557054	1.92935	3.56931	4.15	5.4	5.7	6.8
0.481261	1.57227	3.06518	3.55	4.65	5.25	6.65
0.551184	1.66369	3.11858	3.7	4.9	5.85	7.55
0.674194	1.95649	3.73271	4.5	5.8	6.7	8.4
0.682646	1.87495	3.92361	4.8	6.25	7	8.8
0.666991	1.85627	3.94075	4.8	6	6.75	8.7
0.66607	1.74222	3.9784	4.75	5.85	6.7	8.05
0.68914	1.87251	4.10642	4.8	6.15	7.15	8.25
0.726957	2.16042	4.54706	5.25	6.6	7.6	9.2
0.717983	1.97451	4.53368	5.35	6.7	7.7	9.35
0.69085	1.84384	4.23193	5.1	6.35	7.25	8.65
0.578257	1.60618	3.68535	4.4	5.5	6.3	7.45
0.496207	1.38337	3.1693	3.8	4.9	5.75	7.05
0.582719	1.62219	3.2718	3.9	5.1	6.05	7.5
0.567882	1.59688	3.24946	3.85	4.95	6	7.05
0.529131	1.50888	3.22788	3.9	5.05	6.15	7.95
0.697614	1.94278	3.83593	4.65	6	6.8	9.2
0.657503	1.84661	3.67818	4.4	5.6	6.35	8.55
0.524812	1.41791	3.07388	3.7	4.95	5.85	7.45
0.590493	1.80759	3.3759	4.05	5.3	6.3	8
0.716239	2.55763	4.33345	5	6.3	7.35	9.35
0.80337	2.67301	4.56019	5.25	7	7.7	9.35
0.770777	2.15094	3.99963	4.65	6.35	7	8.3
0.604975	1.60968	3.38175	3.95	5.15	5.95	7.5
0.46047	1.37333	2.88276	3.4	4.65	5.65	7.6
0.500659	1.41775	2.98169	3.5	4.9	5.8	7.1
0.555392	1.47462	2.97186	3.6	4.85	5.45	6.5
0.565624	1.59259	3.15327	3.85	5.1	5.8	6.7
0.499537	1.44981	2.9237	3.55	4.7	5.45	6.7
0.571566	1.5114	2.98026	3.6	4.75	5.45	7.1
0.641877	1.67124	3.34057	4	5.2	5.85	6.9
0.492916	1.38805	2.81893	3.4	4.45	5.3	6.15
0.569299	1.57056	2.94469	3.55	4.5	5.05	6.1
0.615161	1.64852	3.14546	3.85	4.9	5.25	6.2
0.480978	1.35488	2.76764	3.4	4.3	4.9	5.4
0.424211	1.29315	2.54099	3.05	3.75	4.25	5.3
0.475436	1.52658	2.9197	3.45	4.3	4.95	6.45
0.517553	1.60636	3.06889	3.65	4.45	5.35	6.6
0.519731	1.61295	3.24379	3.9	5.05	5.85	7.05
0.640872	2.09026	4.17392	4.95	6.8	7.6	9.05
0.715912	2.22433	4.47068	5.25	6.85	7.7	9.45
0.681693	1.95584	4.12497	4.8	6	6.7	8.45
0.605919	1.81662	3.8036	4.4	5.95	6.7	8.65
0.742395	2.45081	4.30391	4.95	6.65	7.65	9.35
0.986696	3.29326	5.03459	5.75	7.35	8.25	9.6
1.16474	3.77023	5.52683	6.2	7.7	8.6	9.9
1.16178	3.85261	5.68122	6.3	7.75	8.95	10.55
0.889131	3.16351	5.03483	5.6	7.3	8.35	10.3
0.806975	2.78533	4.80709	5.35	7.2	8.35	10.7
0.854957	2.7367	5.04568	5.7	7.45	8.65	10.8
0.838229	2.39592	4.79898	5.55	7.2	7.75	9.4
0.827186	2.29635	4.51846	5.25	6.85	7.3	9.45
0.753219	2.25925	4.46683	5.1	6.9	7.75	9.8
0.692782	2.33713	4.24978	4.8	6.5	7.25	9
0.655189	2.28806	3.90598	4.45	5.85	6.75	8.5
0.635112	1.92445	3.95363	4.65	5.95	7.1	8.6
0.599775	1.77698	3.97336	4.7	5.95	7	8.5
0.569609	1.90199	3.75283	4.4	6	6.7	8.2
0.529507	1.77815	3.40845	4	5.65	6.3	8
0.457003	1.40986	2.79583	3.3	4.7	5.45	7.3
0.549243	1.54515	3.25975	3.85	5.55	6.4	7.85
0.67498	1.7068	3.73305	4.35	6	6.7	7.85
0.675585	1.72403	3.38577	3.95	5.1	5.75	7.05
0.616628	1.73697	3.17408	3.8	4.9	5.75	7.3
0.628443	1.81499	3.38938	4.05	5.25	6.3	8.1
0.760775	2.24015	3.92403	4.7	5.8	6.8	8.3
0.917454	2.69798	4.49271	5.35	6.6	7.5	9.4
1.22112	3.17954	5.22886	6.15	7.9	9	11.25
1.21748	3.06696	4.89537	5.85	7.35	8.35	10.25
0.851192	2.37663	3.98361	4.75	5.6	6.45	8.35
0.717826	2.12577	3.75997	4.45	5.5	6.1	7.65
0.681755	1.96263	3.9757	4.7	6	6.5	8.05
0.676569	1.8803	4.05576	4.7	5.85	6.55	8
0.705806	1.98716	3.95255	4.6	5.85	6.65	8.05
0.678205	1.83114	3.92791	4.65	6	6.55	7.8
0.62472	1.69692	3.52855	4.2	5.4	6.05	7.35
0.551764	1.56155	3.05556	3.75	4.85	5.5	7
0.430609	1.23976	2.70149	3.3	4.25	4.8	5.9
0.372284	1.11002	2.44333	2.95	3.7	4.35	5.35
0.445842	1.20337	2.42302	3	3.75	4.25	5.1
0.599582	1.76997	3.28999	3.9	5.25	5.8	6.85
0.629179	2.02281	3.84364	4.45	6.1	6.95	8.2
0.615476	1.85864	3.83741	4.5	5.65	6.7	8
0.665993	1.94387	4.27766	5.05	6.1	7.05	8.95
0.72989	2.09482	4.65794	5.5	6.75	7.75	10.5
0.990531	2.66994	5.48647	6.35	7.95	9.05	12.15
1.07108	3.10139	5.91618	6.75	8.65	9.95	12.3
0.868548	2.65493	5.03168	5.85	7.7	8.95	10.9
0.664995	1.88977	3.98968	4.7	6.3	7.25	9.05
0.633736	1.83694	3.75884	4.4	5.95	7.2	9.15
0.763266	2.19457	4.15088	4.8	6.5	8.05	10.55
0.799888	2.24543	4.24978	4.95	6.3	7.35	9.45
0.742607	1.98364	4.13866	4.85	6.1	6.8	8.45
0.726033	2.01119	4.00436	4.7	6.05	6.9	8.65
0.902283	2.56858	3.99898	4.85	6	6.8	8.55
0.918747	2.4651	3.78518	4.65	5.75	6.6	8.1
0.74302	2.14999	3.53318	4.25	5.4	6.2	7.4
0.673608	1.97701	3.6634	4.4	5.65	6.3	7.3
0.766035	2.06627	3.79448	4.65	6	6.55	7.75
0.763247	2.13641	3.7931	4.55	5.9	6.6	7.9
0.594462	1.79362	3.51493	4.15	5.55	6.4	7.8
0.617664	2.02015	3.92312	4.7	6.2	7.15	8.45
0.759168	2.38762	4.85166	5.75	7.25	8.35	9.75
0.922419	2.78135	5.65268	6.5	8.05	9.35	11.15
0.906901	2.71934	5.66778	6.5	8.1	9.1	11.15
0.871756	2.60757	5.50093	6.4	8	8.85	10.7
0.787528	2.34091	4.91135	5.75	7.4	8.5	9.65
0.594378	1.66819	3.8072	4.5	6.15	7.2	8.9
0.592632	1.61818	3.74389	4.4	5.9	6.7	8.95
0.720065	1.9888	4.26719	4.95	6.5	7.55	9.3
0.908309	2.70771	4.77475	5.6	7.35	8.65	10.05
0.84903	2.62133	4.67119	5.45	7.05	7.85	9.15
0.648866	1.84851	4.00578	4.65	5.85	6.7	8
0.649271	1.78137	3.80452	4.55	5.7	6.8	8.15
0.630639	1.71029	3.68866	4.4	5.45	6.15	7.75
0.599755	1.74346	3.60573	4.25	5.3	5.9	7.4
0.593914	1.81955	3.42977	4.05	5.25	6.05	7.25
0.602888	1.79615	3.64928	4.3	5.5	6	7.05
0.664858	1.87991	4.1231	4.85	6.05	6.7	8.2
0.709658	1.96611	4.25928	4.9	6.05	7.05	9
0.736749	1.96788	3.95789	4.55	5.65	6.4	8.15
0.684385	1.69966	3.42706	4.05	5	5.45	7.15
0.585908	1.59839	3.47738	4.1	5.15	5.6	7.1
0.563154	1.68847	3.5495	4.3	5.3	6	7.5
0.541095	1.61715	3.58896	4.35	5.25	6.1	7.4
0.541482	1.54866	3.29183	3.95	4.8	5.5	6.6
0.51604	1.48466	2.89345	3.5	4.3	5.05	6.15
0.475477	1.60012	3.01256	3.55	4.5	5.5	6.55
0.516572	1.60507	3.01549	3.6	4.65	5.25	6.7
0.529317	1.43645	2.96774	3.65	4.8	5.1	6.5
0.505344	1.4047	2.90256	3.5	4.65	5.45	6.65
0.488035	1.32982	2.7402	3.15	4.05	5	6.4
0.521362	1.52935	2.91922	3.35	4.25	5.1	6.35
0.536349	1.58056	2.95248	3.55	4.6	5.25	6.3
0.496142	1.40066	2.92486	3.55	4.6	5.3	6.5
0.489252	1.4319	3.3291	4	4.9	5.9	7.4
0.547197	1.60736	3.54923	4.3	5.3	6.05	7.55
0.52303	1.47829	3.24792	3.9	5	5.55	6.85
0.51192	1.51704	3.07443	3.7	4.75	5.35	6.6
0.539496	1.60864	3.12478	3.75	4.75	5.2	6.5
0.562446	1.65447	3.35788	3.95	4.85	5.5	7.2
0.688389	2.27422	4.04927	4.7	6.1	7.1	9.05
0.768244	2.71106	4.35704	4.95	6.9	8.1	9.9
0.742648	2.59003	4.18607	4.7	6.45	7.85	9.5
0.669588	2.23347	3.92348	4.45	5.9	6.95	8.35
0.694578	2.16653	3.76105	4.4	5.9	6.7	8.25
0.69112	2.13946	3.70836	4.35	5.8	6.8	8.4
0.64524	2.08677	3.74186	4.4	5.95	7	8.15
0.631812	2.02361	3.86528	4.7	6.3	7.15	8.35
0.632058	1.94014	4.02219	4.85	6.35	7.35	8.65
0.696682	2.04582	4.26644	5.05	6.4	7.3	8.5
0.659003	1.93306	4.13183	4.8	6.25	6.95	7.95
0.683064	2.04305	4.12749	4.75	6.55	7.35	8.1
0.695806	2.19064	3.97605	4.6	6.25	7.05	8.35
0.664807	2.1739	3.65868	4.25	5.55	6.6	8.45
0.709847	2.15797	3.87539	4.55	6.25	7.45	8.7
0.761038	2.24973	4.17809	4.8	6.7	7.8	8.7
0.728153	2.43867	4.04081	4.6	6	7.15	8.9
0.774847	2.81961	4.29865	4.85	6.45	7.5	9.15
0.806452	2.73725	4.43805	4.95	6.65	7.35	8.55
0.64978	2.09733	3.53457	4	5.35	6.5	8.1
0.631836	1.95772	3.3744	3.9	5.4	6.65	7.95
0.648432	2.06918	3.64862	4.3	5.85	6.7	7.9
0.641548	2.05377	3.54877	4.15	5.65	6.75	8
0.673273	2.07434	3.74561	4.25	5.9	7	8.05
0.723827	2.30482	4.00322	4.5	6.1	7	8.3
0.73829	2.33614	4.02556	4.55	6	7.1	8.2
0.586108	1.85063	3.36456	3.85	5.25	6.5	7.6
0.573857	1.8664	3.45676	4	5.3	6.4	8.1
0.620352	1.97943	3.96003	4.55	5.95	7.05	8.95
0.654303	2.02064	4.1919	4.7	6.25	7.25	9.1
0.68602	2.03876	4.00646	4.6	6	6.75	8.6
0.633072	1.70187	3.29809	3.95	5.15	6.05	7.95
0.647362	1.87369	3.73778	4.45	5.7	6.7	8.55
0.712907	2.1839	4.52334	5.3	6.65	7.5	9.1
0.718079	2.16014	4.58413	5.3	6.8	7.55	9.15
0.654205	2.02134	4.19324	5	6.4	7.05	8.65
0.635206	1.82341	4.00274	4.8	6.2	6.8	8
0.624802	1.76396	3.65797	4.3	5.8	6.65	8
0.597365	1.82937	3.47447	4.1	5.45	6.2	7.65
0.547789	1.69931	3.23371	3.8	5.05	5.6	6.85
0.554982	1.78386	3.12391	3.7	5	5.8	7.3
0.579046	2.03329	3.41431	4	5.6	6.4	7.8
0.58652	1.95731	3.44528	3.95	5.55	6.2	7.3
0.552294	1.75842	3.14144	3.6	4.8	5.45	6.6
0.434182	1.45267	2.46351	2.85	3.85	4.6	5.9
0.515558	1.46447	2.48922	2.9	4.15	5	6.15
0.56142	1.65925	3.0485	3.55	4.9	5.75	6.9
0.443959	1.42565	3.04535	3.6	4.8	5.5	6.85
0.456881	1.3531	2.85242	3.45	4.65	5.25	6.8
0.516704	1.60533	3.23556	3.8	5.25	5.9	7
0.621371	2.11054	3.91147	4.5	6.2	6.8	7.7
0.652398	2.36671	4.04299	4.75	6.25	7	8.3
0.574439	1.99073	3.63246	4.25	5.2	5.95	7.35
0.532147	1.57206	3.05157	3.65	4.5	5.1	6.5
0.500176	1.46255	2.81604	3.45	4.45	5.1	6.9
0.611376	1.85659	3.59119	4.35	5.65	6.6	8.6
0.687387	2.14257	4.08182	4.8	6.55	7.85	9.4
0.640021	2.19286	4.07617	4.6	6.2	7.35	8.8
0.667297	2.19152	3.97326	4.6	5.7	6.75	8.25
0.611922	1.87788	3.72175	4.45	5.5	6.35	8.25
0.608522	1.71781	3.70218	4.5	6.05	6.75	8.75
0.666936	1.89476	3.9929	4.8	6.6	7.65	9.3
0.701802	2.20005	4.40897	5.15	6.95	8.15	9.4
0.769203	2.40961	4.77149	5.45	7	7.9	9.15
0.706116	2.17294	4.45519	5.25	6.35	7.3	8.8
0.577732	1.7466	3.50835	4.25	5.45	6.4	7.8
0.592283	1.80041	3.36508	3.95	5.1	5.8	6.95
0.609684	1.74801	3.37902	3.95	4.9	5.55	6.65
0.564585	1.57795	3.30552	3.9	5.05	5.8	6.9
0.583824	1.69603	3.46929	4.15	5.45	6.1	6.9
0.551671	1.64416	3.37678	4	5.35	5.9	6.85
0.465258	1.42771	3.11035	3.7	4.85	5.5	6.65
0.47333	1.44769	3.13981	3.75	4.7	5.35	6.3
0.50366	1.40283	3.26822	3.9	4.85	5.6	6.8
0.509138	1.42688	3.44121	4.15	5.15	6.2	7.6
0.537536	1.60321	3.49785	4.15	5.3	6.3	7.6
0.619388	1.82788	3.51685	4.2	5.35	6	7.35
0.650752	1.92689	3.68431	4.4	5.65	6.4	7.8
0.741102	2.18306	4.49928	5.35	6.9	7.85	9.95
0.804527	2.42136	4.91978	5.85	7.3	8.55	11.15
0.69023	2.16868	4.09729	4.8	6.3	7.55	9.7
0.619518	1.9354	3.63691	4.25	5.85	6.85	9.05
0.726267	2.16063	4.1958	4.9	6.6	7.35	9.25
0.768378	2.21272	4.23284	5.05	7	7.55	8.6
0.678379	1.88118	3.85796	4.65	6.15	7	8.25
0.657264	1.86268	4.09851	4.85	6	7.2	9
0.705793	2.03376	4.12235	5	6.5	7.75	9.55
0.802994	2.22361	4.28704	5.2	7	8.05	9.75
0.721178	2.05671	4.10434	4.8	6.55	7.6	9.4
0.611072	1.85663	3.76398	4.4	6.1	7.1	8.4
0.62676	1.89803	3.65525	4.35	5.9	6.6	7.15
0.565339	1.76303	3.28085	3.95	5.4	6.05	6.75
0.489735	1.47884	2.81637	3.4	4.75	5.35	6.6
0.485556	1.49327	2.78883	3.35	4.6	5.25	6.7
0.57568	1.91742	3.54981	4.1	5.55	6.15	7.8
0.710043	2.30259	4.21022	4.85	6.5	7.15	9
0.642694	2.02033	3.8672	4.6	6.25	7.05	8.9
0.555	1.73595	3.53484	4.1	5.5	6.3	7.9
0.68066	2.02664	3.74374	4.2	5.6	6.55	8.05
0.77472	2.42604	4.03073	4.55	6.15	7.1	8.55
0.734658	2.55165	4.00123	4.55	5.85	6.9	8.1
0.60938	2.03286	3.36489	3.95	4.8	5.7	6.8
0.440793	1.27123	2.59399	3.15	4.05	4.8	6.2
0.436638	1.29928	2.66453	3.15	4.4	5.4	6.7
0.522379	1.65214	3.1309	3.65	4.85	5.6	6.35
0.552482	1.80677	3.17806	3.7	5	5.7	6.5
0.627882	1.88975	3.18642	3.7	5.1	6	7
0.623723	1.81973	3.02343	3.5	4.75	5.55	6.5
0.6035	1.86534	2.989	3.45	4.8	5.75	6.85
0.604005	1.88772	3.16323	3.7	4.85	5.95	7.35
0.592309	1.90361	3.18136	3.75	5	6.05	7.3
0.652543	2.17529	3.54616	4.05	5.55	6.45	7.6
0.755584	2.2214	3.69665	4.2	5.4	6.25	7.4
0.738228	2.0667	3.49006	3.85	4.9	5.7	6.55
0.563473	1.87851	3.14864	3.45	4.6	5.25	6.1
0.531465	1.59739	2.78069	3.25	4.4	4.9	5.7
0.484934	1.38531	2.70165	3.2	4.2	4.75	5.5
0.423988	1.31076	2.79107	3.25	4.05	4.75	5.75
0.39754	1.31634	2.61692	3	3.7	4.45	5.6
0.450433	1.70477	2.81188	3.25	4.2	4.95	5.8
0.516435	1.84215	3.1679	3.65	4.65	5.4	6.4
0.481518	1.51521	3.03185	3.45	4.25	5.1	6.3
0.447322	1.35546	2.60852	3.05	3.8	4.55	5.5
0.370634	1.16105	2.07016	2.55	3.4	3.95	5.3
0.406607	1.36795	2.40142	2.95	4.1	4.8	6.7
0.573847	1.91127	3.22294	3.8	5.1	5.95	7.65
0.697483	2.20779	3.73028	4.3	5.55	6.5	7.65
0.873106	2.77504	4.28381	4.95	6.3	7.4	8.75
0.934554	2.90796	4.31261	4.95	6.35	7.5	9.15
0.738507	2.2643	3.75344	4.3	5.65	6.7	8.05
0.675411	2.13258	3.84398	4.4	5.8	6.8	7.65
0.765432	2.55126	4.34292	4.9	6.25	7.35	8.05
1.03293	3.1332	4.825	5.4	6.95	8.25	9.1
1.01063	2.98065	4.63218	5.15	7	8.2	9.45
0.78788	2.52612	4.14905	4.7	6.35	7.2	8.9
0.72813	2.38789	3.79738	4.35	5.55	6.45	8.2
0.800449	2.62699	4.05721	4.6	6.1	7.35	9.2
1.12139	3.67625	5.42433	6.15	8.2	9.7	11.8
1.20584	3.95664	5.90458	6.65	8.7	9.85	11.45
0.978056	3.11515	4.99334	5.65	7.55	8.55	10.2
0.896782	2.92043	4.84224	5.4	7.3	8.5	10.6
0.885859	2.96245	4.87437	5.4	7.35	8.65	10.25
0.754968	2.43673	4.23693	4.8	6.4	7.55	8.75
0.672285	2.00971	3.69487	4.25	5.55	6.4	7.75
0.593031	1.89448	3.35109	3.9	5.05	5.95	7.35
0.482997	1.70974	3.05355	3.5	4.55	5.45	6.8
0.466126	1.65873	2.98209	3.3	4.35	5.35	6.4
0.569202	1.97317	3.45362	3.85	5.05	5.95	6.45
0.829469	2.74177	4.37072	4.95	6.65	7.85	9
1.07557	3.67669	5.59176	6.2	8.25	9.95	12.2
1.00789	3.62474	5.65735	6.25	8.45	10.05	12.9
0.858357	2.87781	5.18606	5.75	8.05	9.55	12
0.706058	2.20195	4.53688	5.1	7.2	8.6	10.35
0.545944	1.76979	3.59777	4.25	6	6.95	8.75
0.511316	1.71169	3.33622	3.95	5.3	6	7.45
0.478441	1.63196	3.04001	3.5	4.9	5.8	6.95
0.500089	1.79335	3.16355	3.65	5.2	6.1	7.5
0.562141	2.06312	3.43205	4.05	5.35	6.4	7.6
0.567262	1.95293	3.36732	4	5.4	6.55	8
0.598761	1.84929	3.3889	3.95	5.4	6.4	8
0.586279	1.77255	3.0924	3.55	4.85	5.85	7.1
0.635282	1.83091	2.95394	3.4	4.6	5.55	6.9
0.80239	2.23876	3.35475	3.85	5	5.9	7.35
1.00726	2.57812	3.75562	4.3	5.5	6.8	8.25
0.954457	2.38722	3.55184	4.1	5.15	6.35	7.95
0.732214	2.03503	3.09055	3.7	4.8	5.65	6.85
0.745154	2.19573	3.31536	3.9	5.15	5.75	6.05
0.747309	2.27396	3.58008	4.1	5.35	5.55	5.95
0.672522	1.96543	3.23138	3.75	5	5.4	6.35
0.617324	1.84872	3.00804	3.5	4.65	5.2	6.3
0.525757	1.78282	2.81238	3.25	4.4	5	5.95
0.385225	1.46516	2.24596	2.55	3.6	4.3	5.15
0.34923	1.40551	2.16791	2.4	3.15	3.75	4.5
0.435227	1.60866	2.57405	2.9	3.8	4.45	5.25
0.455397	1.58378	2.65476	3.1	4.1	4.85	5.85
0.451489	1.63806	2.53282	2.95	3.75	4.45	5.5
0.470242	1.63527	2.519	2.9	3.7	4.2	4.95
0.485236	1.67618	2.83246	3.2	4.1	4.4	5.05
0.490775	1.67619	2.78374	3.15	4.25	4.7	5.55
0.440411	1.5565	2.43666	2.8	3.8	4.55	5.5
0.450508	1.62688	2.50937	2.85	3.8	4.35	5.4
0.515642	1.59727	2.88473	3.35	4.45	5	6.65
0.515931	1.51569	3.0018	3.55	4.6	5.4	6.8
0.613564	1.68849	3.07303	3.6	4.9	5.9	7.1
0.882642	2.45958	3.93281	4.5	5.95	7.4	9.55
1.05081	3.42694	5.16003	5.7	7.1	8.5	11.05
1.06437	3.70167	5.4643	6	7.7	8.75	11
0.915333	3.15301	4.68404	5.25	7.05	8.05	9.7
0.814278	2.75506	4.46373	5.05	6.8	7.8	9.25
0.814261	2.64921	4.57226	5.2	6.85	7.85	9.5
0.665027	2.1501	3.86739	4.4	5.8	6.45	8.45
0.589274	1.99708	3.47949	3.9	5.2	6.15	8.3
0.634808	2.26196	3.90396	4.4	5.85	7.25	8.95
0.63848	2.18841	3.96839	4.55	6.1	7.2	8.7
0.690712	2.33372	4.20527	4.8	6.6	8	9.75
0.736767	2.62776	4.49628	5	6.95	8.75	10.6
0.736188	2.68611	4.38615	4.9	6.75	8.35	10.1
0.722413	2.79398	4.38252	4.95	6.75	7.95	9.75
0.746215	2.96282	4.47628	5	6.7	7.85	10.05
0.787937	2.925	4.45513	4.95	6.7	7.9	9.75
0.724433	2.51476	4.02555	4.55	6.35	7.3	8.75
0.710639	2.40332	3.96855	4.65	6.5	7.25	8.45
0.672208	2.36979	3.82546	4.5	6	6.85	8
0.680412	2.3541	3.66673	4.25	5.45	6.7	7.75
0.747005	2.56001	3.89102	4.35	5.6	7	8.15
0.797736	2.58645	4.02853	4.5	5.9	6.95	8.25
0.919118	2.79171	4.28979	4.85	6.35	7.15	8.3
0.851664	2.65275	4.14568	4.6	5.8	6.65	8
0.651946	1.98547	3.44267	3.9	5.05	5.9	7.05
0.561687	1.73634	3.12869	3.6	4.9	5.65	6.85
0.482006	1.6298	3.01439	3.45	4.6	5.2	6.65
0.517506	1.828	3.36009	3.9	5.1	5.7	7.15
0.723128	2.45485	4.35686	5.05	6.6	7.4	9.05
0.805214	2.46573	4.49422	5.1	6.75	7.7	9.35
0.63737	2.00251	3.60723	4.15	5.55	6.5	7.7
0.487506	1.71927	3.05869	3.6	4.8	5.5	6.6
0.483178	1.63579	3.03947	3.5	4.5	5.05	6.45
0.567655	1.70202	3.2928	3.85	4.75	5.45	7
0.542557	1.5372	3.20221	3.8	4.9	5.65	7.1
0.478823	1.49304	2.84453	3.4	4.5	5.2	6.3
0.521614	1.80545	2.91934	3.45	4.45	5.25	6.35
0.783466	2.02155	3.05298	3.55	4.7	5.7	7.05
0.9178	2.17601	3.23039	3.65	4.85	6	7.45
0.932728	2.22809	3.27847	3.7	4.95	6.1	7.6
0.897379	2.20115	3.23788	3.7	4.75	5.6	7.15
0.762631	2.1043	3.2049	3.55	4.35	5.15	6.95
0.906709	2.22716	3.31921	3.7	4.85	5.9	7.65
0.926074	2.42941	3.49393	4	5.35	6.45	8.1
0.833964	2.65773	3.89777	4.4	5.6	6.5	8
0.768078	2.44092	3.92021	4.4	5.7	6.5	7.7
0.616837	1.90129	3.45868	4	5.25	6	7.35
0.524858	1.78089	3.34232	3.9	4.95	5.75	7.05
0.678022	2.10417	3.78776	4.35	5.6	6.8	7.8
0.788579	2.37284	3.96305	4.5	5.95	7.2	8.05
0.669868	2.23595	3.5635	4	5.35	6.15	7.15
0.526235	1.82363	3.14783	3.6	4.8	5.65	6.8
0.456048	1.43014	2.83293	3.35	4.65	5.55	6.2
0.443844	1.31208	2.62495	3.15	4.3	4.7	5.35
0.411706	1.18282	2.34298	2.8	3.6	3.9	4.95
0.432623	1.36497	2.41497	2.9	3.75	4.2	5.2
0.580076	1.84155	3.18788	3.8	5	5.6	6.75
0.770437	2.31835	4.21647	5	6.4	7.1	8.5
0.702249	2.12801	4.04893	4.8	6.35	7.2	8.75
0.590381	1.97969	3.78989	4.45	6	7	8.95
0.585887	1.98915	3.87755	4.5	5.95	6.8	8.65
0.53394	1.6851	3.50559	4.1	5.35	6.05	7.65
0.535057	1.56935	3.4511	4	5.05	5.8	7.35
0.48483	1.44986	3.00707	3.5	4.7	5.45	6.7
0.466488	1.57695	2.623	3.2	4.3	4.75	5.75
0.444544	1.43826	2.5063	3.05	4.1	4.6	5.65
0.496419	1.42323	2.73412	3.25	4.4	5.25	6.55
0.567977	1.65109	3.14344	3.7	4.9	5.95	7.3
0.67008	1.86596	3.56315	4.3	5.6	6.4	7.55
0.695405	2.00434	3.6408	4.5	5.6	6.1	7.8
0.523092	1.62883	2.95538	3.65	4.6	5.35	7.35
0.515994	1.57786	2.961	3.55	4.75	5.45	7
0.58494	1.74449	3.15324	3.8	5.05	5.6	6.9
0.612063	1.77874	3.35301	4.1	5.35	5.9	7.05
0.593734	1.76851	3.48644	4.1	5.45	6.15	7.2
0.517633	1.46757	2.81637	3.25	4.5	5.05	5.85
0.425319	1.21737	2.4191	2.9	4.1	4.5	5.3
0.409667	1.38856	2.6216	3.15	4.4	5.1	5.95
0.416568	1.44833	2.70136	3.25	4.55	5.35	6.2
0.482356	1.50234	3.07352	3.7	4.95	5.75	7.05
0.595204	1.80474	3.49196	4.05	5.25	6	7.3
0.577775	1.81552	3.34552	3.8	5.1	6	7.65
0.553583	1.69712	3.31137	3.8	5.15	6.1	7.7
0.515334	1.62929	3.2657	3.8	4.95	5.8	6.8
0.606275	1.98426	3.26969	3.8	4.9	5.6	6.35
0.642376	2.08314	3.27911	3.75	5.05	5.65	6.3
0.529583	1.79586	3.11472	3.65	5.15	5.7	6.3
0.470863	1.61199	2.93618	3.45	4.85	5.35	6
0.499271	1.60502	2.94991	3.4	4.7	5.8	7.3
0.756517	2.53722	4.05682	4.6	6.2	7.65	9.2
0.902397	3.09122	4.80805	5.5	7.35	8.35	9.9
0.847802	2.7522	4.44388	5.1	6.85	7.9	9.8
0.873004	2.68574	4.23088	4.75	6.45	7.7	9.55
0.817454	2.51002	3.78629	4.25	6	7.2	8.75
0.623109	1.98065	3.22648	3.65	5.05	6.1	7.2
0.539587	1.71306	2.95354	3.45	4.55	5.4	6.15
0.535412	1.79602	2.92784	3.45	4.55	5.35	6.1
0.487679	1.70085	2.8118	3.25	4.1	4.65	5.8
0.449412	1.40259	2.54471	3	3.85	4.45	5.75
0.460381	1.45327	2.54939	3	4.05	4.85	5.8
0.623123	1.9433	3.05448	3.5	4.6	5.55	6.4
0.677439	2.12822	3.29294	3.8	4.95	5.8	7.15
0.588468	2.026	3.19893	3.7	4.9	5.5	7
0.629001	2.10206	3.46432	3.95	5.3	5.7	6.9
0.842222	2.46091	3.91233	4.4	5.95	6.5	7.7
0.86462	2.44494	3.91977	4.4	6.15	7	8.35
0.631887	1.89699	3.3854	3.9	5.3	6.25	7.7
0.601947	2.05926	3.57186	4.1	5.4	6.45	7.7
0.623096	2.2274	3.87614	4.45	5.95	6.75	8.05
0.531615	1.73422	3.33297	3.85	5.1	5.8	7.45
0.456285	1.56353	2.78358	3.2	4.2	5.05	7
0.452323	1.55915	2.65865	3.15	4.05	4.6	6.05
0.449986	1.44201	2.54355	3	4.05	4.45	5.35
0.625771	1.70319	2.9084	3.45	4.6	4.9	6
0.674321	1.79151	3.13065	3.7	4.7	5.25	6.45
0.547639	1.70626	2.86488	3.3	4.15	5.1	6.25
0.563254	1.91668	2.93549	3.35	4.35	5.15	5.9
0.477253	1.71849	2.71562	3.1	4.45	5.2	5.9
0.409748	1.4099	2.41456	2.9	4.25	5	6.05
0.532069	1.71745	2.7578	3.3	4.6	5.55	6.75
0.61413	1.98535	3.36162	3.9	5.35	6.25	7.45
0.558904	1.84766	3.44235	4	5.35	6.25	7.5
0.501527	1.67156	2.94621	3.45	4.5	5.65	7.3
0.582687	1.96104	3.23137	3.7	4.65	5.65	7.35
0.621071	2.13289	3.61601	4.1	5.3	6.15	7.35
0.631321	1.98793	3.69862	4.25	5.75	6.8	7.9
0.687588	1.96469	3.78477	4.4	5.95	7.05	8.45
0.630734	1.76598	3.6401	4.25	5.8	6.8	8.25
0.49108	1.36594	3.04761	3.65	5	6	7.4
0.354947	0.980543	2.28734	2.8	3.8	4.6	6.15
0.376109	1.06292	2.28622	2.75	3.85	4.65	6.35
0.481283	1.50589	2.81228	3.4	4.65	5.6	7.1
0.491624	1.52054	2.94237	3.5	4.7	5.35	6.55
0.485538	1.36203	2.70255	3.3	4.55	5.15	6.4
0.559739	1.6091	3.1621	3.9	5.5	6.25	7.15
0.563105	1.67528	3.19795	3.95	5.7	6.35	6.8
0.469072	1.39161	2.71203	3.35	4.65	5.25	6.3
0.481226	1.45723	2.9903	3.55	4.5	5	6.35
0.527967	1.69574	3.09789	3.7	4.6	5	5.85
0.544733	1.76794	3.08159	3.7	4.7	5.25	6
0.529186	1.55047	3.04949	3.65	4.65	5.3	6.15
0.494695	1.32671	2.77378	3.35	4.25	5	6.1
0.546112	1.53784	3.2733	4	5.15	5.95	7.15
0.657857	1.90963	4.08357	4.95	6.3	6.85	8
0.689154	2.0874	4.5189	5.35	6.7	7.5	8.85
0.686363	1.94495	4.45393	5.3	6.65	7.85	9.65
0.740773	1.94268	4.51668	5.3	6.6	7.7	9.9
0.679974	1.84417	4.11751	4.75	6	6.9	9
0.707255	2.02538	3.60249	4.2	5.2	6.05	7.6
0.749535	2.1433	3.44956	4.1	4.95	5.75	6.9
0.572577	1.63446	3.10646	3.75	4.65	5.45	6.5
0.449244	1.34462	2.82555	3.3	4.35	4.95	5.95
0.462265	1.40273	2.85379	3.35	4.3	4.65	5.65
0.626654	1.91878	3.26857	3.95	4.8	5.35	6.35
0.702244	2.10322	3.46929	4.1	5.05	5.6	6.75
0.626211	1.77851	3.25878	3.8	4.7	5.25	6.6
0.566936	1.64032	3.17101	3.75	4.65	5.3	6.5
0.4674	1.33864	2.98353	3.55	4.65	5.2	6.15
0.480997	1.30015	2.94908	3.45	4.85	5.5	6.3
0.530943	1.42411	2.85285	3.35	4.7	5.2	5.95
0.430516	1.11986	2.34311	2.9	3.9	4.15	4.95
0.343875	0.957351	2.14937	2.7	3.55	3.9	4.65
0.350308	1.09251	2.20544	2.65	3.65	4.1	4.6
0.362757	1.13742	2.44176	2.95	4	4.5	4.85
0.437246	1.16679	2.52323	3.15	4.05	4.6	5.2
0.442854	1.18742	2.34757	2.95	3.85	4.4	5.2
0.368438	1.18266	2.25655	2.75	3.95	4.55	5.4
0.422567	1.40665	2.67279	3.2	4.4	5.05	5.95
0.458178	1.5029	2.80388	3.35	4.45	5	5.85
0.401664	1.2793	2.29429	2.75	3.8	4.3	5.25
0.417956	1.25025	2.10683	2.55	3.35	3.7	5.7
0.452248	1.31124	2.57517	3.05	3.95	4.5	6.65
0.517519	1.66109	3.30825	3.95	4.95	5.7	6.85
0.539108	1.82018	3.43936	4.1	5.4	6	7.25
0.59703	1.77463	3.56845	4.25	5.75	6.35	7.85
0.647713	1.74401	3.55942	4.25	5.65	6.5	7.7
0.605423	1.75179	3.25382	3.95	5.4	6.35	7.35
0.572639	1.72237	3.26653	3.95	5.1	5.8	6.95
0.522977	1.49204	3.41405	4	5.1	5.9	7.15
0.61353	1.74394	3.91261	4.6	5.9	6.85	8.15
0.669732	1.91131	4.02934	4.8	6.05	6.95	8.4
0.645013	1.98205	3.78407	4.45	5.9	7	8.45
0.668301	2.22749	3.91244	4.45	6.25	7.45	8.6
0.674837	2.33161	3.93097	4.5	6.25	7	7.8
0.567535	1.79963	3.26518	3.75	5.25	5.6	6.35
0.467931	1.3631	2.87348	3.3	4.45	5.1	5.95
0.491234	1.51746	2.99659	3.55	4.55	5.4	6.45
0.645308	2.05234	3.64163	4.35	5.65	6.25	7.6
0.686175	2.28539	4.1747	4.95	6.5	7.2	9.1
0.688981	2.33428	4.44101	5.15	7.05	7.9	9.95
0.845428	2.66781	4.90969	5.6	7.65	8.5	10.5
0.818104	2.47542	4.60845	5.2	7.1	7.9	10.2
0.754485	2.26328	4.20136	4.75	6.5	7.35	8.9
0.746652	2.26646	3.8424	4.35	5.65	6.55	7.6
0.738706	2.08164	3.28774	3.8	5.05	5.85	7.3
1.03865	2.42437	3.62352	4.2	5.8	6.8	8
1.01149	2.4597	3.69081	4.2	5.65	6.8	7.8
0.758084	1.98492	3.13146	3.75	4.85	5.75	7.15
0.934357	2.29794	3.43618	4.05	5.2	6	7.55
1.00914	2.50377	3.69932	4.2	5.45	6.5	7.95
0.815524	2.3443	3.67107	4.1	5.45	6.6	8.15
0.669115	2.18102	3.67242	4.1	5.45	6.45	7.8
0.642028	1.95334	3.35375	3.9	5.15	5.8	7.35
0.553281	1.69273	3.12115	3.7	5	5.45	7.1
0.468942	1.46924	2.82734	3.35	4.6	5.2	6.4
0.402276	1.25855	2.46331	2.9	3.9	4.35	5.3
0.357475	1.09002	2.14833	2.55	3.35	3.85	4.9
0.389091	1.09481	2.2399	2.7	3.6	4.25	5.35
0.487768	1.30692	2.62586	3.15	4.2	4.65	5.6
0.614369	1.6649	2.76499	3.25	4.15	4.7	5.5
0.74219	2.00406	2.85574	3.25	3.95	4.7	6.15
0.87402	2.44593	3.55001	4	4.9	5.85	8
0.72834	2.22737	3.49215	4	5.1	5.8	7.2
0.477368	1.67099	2.61503	3.05	4	4.6	5.35
0.459605	1.57564	2.42985	2.85	3.8	4.45	5.3
0.477042	1.55473	2.46215	2.85	4.05	4.7	5.9
0.571726	1.96277	3.07603	3.5	4.9	5.85	7.05
0.567954	1.98449	3.25789	3.75	5.1	6.05	7.05
0.451184	1.60064	2.92472	3.35	4.6	5.4	6.6
0.469368	1.46019	2.71516	3.1	4.3	4.8	6
0.569501	1.42375	2.34711	2.7	3.7	4.1	4.95
0.53591	1.54126	2.30072	2.6	3.5	4	4.65
0.383531	1.35752	2.02761	2.3	3.2	3.8	4.8
0.367508	1.27695	2.04138	2.4	3.2	3.7	4.75
0.389712	1.225	2.25682	2.65	3.3	3.75	4.6
0.399864	1.09775	2.08013	2.4	3.2	4.05	5.1
0.501771	1.31583	2.31324	2.75	3.8	4.95	5.8
0.57473	1.54111	2.72593	3.25	4.45	5.5	6.2
0.571582	1.78878	3.03209	3.55	4.85	5.65	6.5
0.572632	1.79953	3.04725	3.65	5.05	5.9	7.2
0.617167	1.89865	3.58279	4.35	5.9	6.7	8.15
0.622466	1.92481	3.81315	4.55	6.1	6.85	7.85
0.558413	1.81719	3.31078	3.85	5.3	5.9	6.85
0.553053	1.91344	3.37959	3.95	5.5	6.1	7.25
0.583675	2.03859	3.70474	4.3	5.8	6.85	7.95
0.57925	1.81731	3.30172	3.8	5	5.95	7.25
0.516248	1.40092	2.75552	3.25	4.25	4.9	6.15
0.533941	1.71276	3.21078	3.7	5.05	5.95	7.3
0.678046	2.2528	3.95644	4.55	6.35	7.45	9.3
0.757732	2.30645	4.31245	5	6.45	7.3	8.45
0.620751	1.85088	3.70436	4.35	5.4	5.9	6.6
0.485085	1.46724	2.6752	3.2	4.05	4.5	5.55
0.404399	1.19176	2.18916	2.6	3.55	4	5.35
0.454602	1.4337	2.91223	3.35	4.8	5.4	6.8
0.559422	1.72768	3.54152	4.05	5.4	6.3	7.55
0.631121	1.81788	3.82457	4.55	5.85	7.1	8.35
0.829971	2.43857	4.61225	5.5	6.95	8.25	9.6
0.970289	2.83974	4.79913	5.55	6.9	7.85	9.55
0.979771	2.8301	4.8799	5.55	7	7.85	9.7
0.916127	2.5519	4.9209	5.7	7.05	7.9	9.55
0.819264	2.34748	4.83983	5.65	6.8	7.9	9.55
0.737498	2.15624	4.74597	5.6	6.9	8.15	9.8
0.717367	1.95455	4.66335	5.5	6.6	7.5	9.35
0.775732	2.04319	4.6702	5.4	6.65	7.5	9.4
0.783451	2.05196	4.54319	5.25	6.85	7.9	9.3
0.657936	1.92079	4.04321	4.75	6.1	7.25	8.4
0.565623	1.74775	3.37446	4	5.6	6.85	8.4
0.659881	2.03924	3.64049	4.25	6.05	7	8.9
0.704224	2.25839	3.80238	4.45	6.15	7	8.45
0.606075	1.86523	3.36019	4.05	5.5	6.35	7.65
0.589857	1.74958	3.40238	4.15	5.55	6.2	7.4
0.562102	1.85214	3.45981	4.1	5.75	6.6	8
0.59392	2.00738	3.77567	4.4	6.05	6.95	8.75
0.661667	2.15637	4.17076	4.8	6.3	6.75	7.85
0.633149	1.95721	3.80298	4.45	5.7	5.95	6.8
0.648219	1.79827	3.64079	4.35	5.5	5.8	6.95
0.644205	1.82896	3.62072	4.2	5.65	6.4	7.45
0.617274	1.85815	3.58583	4.2	5.75	6.6	8
0.648899	1.82063	3.77162	4.5	5.85	6.65	8.4
0.624949	1.68444	3.51237	4.2	5.45	6.45	7.85
0.550743	1.65698	3.132	3.8	5.1	5.75	6.7
0.617993	2.19891	3.6224	4.2	5.7	6.4	7.6
0.670849	2.50855	3.83866	4.35	5.9	6.95	8.25
0.741221	2.57811	3.69448	4.25	5.75	6.75	7.75
0.727834	2.45717	3.60975	4.1	5.45	6.3	7.6
0.567447	1.84893	3.06731	3.5	4.55	5.45	6.6
0.515873	1.50625	2.52564	3	4.05	4.95	5.75
0.508533	1.56165	2.38141	2.85	3.8	4.55	5.45
0.626041	1.94999	2.84705	3.3	4.1	4.85	5.85
1.0019	2.44417	3.53023	4	4.95	5.65	6.8
1.03946	2.49736	3.68794	4.2	5.05	6	7
0.690052	1.9138	2.96545	3.4	4.25	5.25	6.1
0.463558	1.41303	2.2956	2.6	3.55	4.15	5
0.314151	1.05276	1.84755	2.15	2.95	3.45	4.4
0.294718	0.915567	1.70713	2.1	3.15	3.65	4.6
0.326589	1.06859	2.07687	2.55	3.8	4.25	5.05
0.416827	1.35431	2.43957	2.95	3.9	4.45	5.35
0.460167	1.46584	2.48308	2.9	3.9	4.6	5.45
0.380099	1.23121	2.20989	2.45	3.5	4.2	4.9
0.401393	1.36576	2.26193	2.5	3.45	4	4.75
0.411112	1.50944	2.39022	2.75	3.65	4.3	4.85
0.35914	1.23385	2.12731	2.55	3.4	4.2	5
0.521617	1.58159	2.41482	2.9	4.1	4.8	5.75
0.715519	2.14725	3.1195	3.7	4.95	5.6	6.35
0.788164	2.32086	3.61099	4.2	5.55	6.45	7.6
0.726125	2.20417	3.54544	4.05	5.55	6.85	8.5
0.645967	2.16573	3.48336	4	5.4	6.6	8.5
0.747287	2.49305	3.95696	4.55	6	6.95	8.65
0.981563	2.90235	4.2231	4.8	6.35	7.1	8.55
0.996166	2.83344	3.97652	4.45	5.9	6.75	8.25
0.790699	2.21364	3.32923	3.75	4.95	5.95	7
0.799728	1.90202	2.96585	3.35	4.5	5.45	6.55
0.962278	2.08123	3.22152	3.6	4.7	5.65	6.95
1.29866	2.48135	3.39643	3.85	5	5.85	7
2.71791	2.8312	3.2714	4	5.5	6.25	7.65
2.90281	3.18597	3.74987	4.6	6.1	7.15	8.1
2.58345	2.8783	3.24155	3.8	5.1	6.2	7.6
1.95474	2.35869	2.63504	3.15	4.35	5.2	6.85
2.32549	2.84018	3.2979	3.95	4.9	5.85	7.3
2.76043	3.18784	3.76538	4.55	5.55	6.65	8.3
2.65977	3.09835	3.66562	4.5	5.75	6.7	8.6
2.36064	2.85936	3.49453	4.35	5.65	6.2	7.85
2.00017	2.3702	2.88209	3.65	4.75	5.25	6.7
1.82405	2.16199	2.59039	3.2	4.25	5.05	6.25
1.7351	2.15679	2.45683	3.1	4.15	4.8	5.75
1.62245	2.02636	2.27221	2.9	3.9	4.2	5.2
1.41959	1.75004	2.04467	2.5	3.4	3.85	5.1
1.38887	1.7273	1.97094	2.5	3.25	4	5.35
1.59001	1.90647	2.15419	2.75	3.8	4.45	5.9
1.93407	2.26201	2.63012	3.3	4.55	5.25	6.55
2.03723	2.45018	2.89504	3.6	4.95	5.8	6.7
1.76389	2.20737	2.62003	3.2	4.6	5.55	6.55
1.75322	2.20137	2.68751	3.25	4.55	5.35	6.35
1.9601	2.36446	2.85016	3.45	4.8	5.45	6.2
1.96233	2.38058	2.73591	3.35	4.55	5.1	5.8
1.93343	2.39246	2.70813	3.35	4.35	5	6.15
2.40504	2.8856	3.28847	4.1	5.5	6.2	7.4
2.40405	2.82327	3.26498	4.15	5.55	6.25	7.1
2.01851	2.38192	2.63735	3.5	4.6	5.5	6.65
2.38996	2.79896	3.08009	3.95	5.35	6.2	7.3
2.60869	3.04942	3.51348	4.4	6.05	6.9	8.25
2.43838	2.94496	3.50804	4.4	6	6.65	8.4
2.28186	2.81746	3.497	4.35	5.6	6.3	7.65
1.80156	2.28886	2.83727	3.6	4.65	5.4	6.55
2.15606	2.57858	3.01737	3.7	5.15	5.55	6.15
2.20477	2.58452	3.00891	3.85	5.35	5.85	6.4
1.7543	2.14978	2.5365	3.65	4.7	5.3	6.35
2.04361	2.56367	2.88126	3.95	5.05	5.5	6.1
2.29076	2.82249	3.06382	4.05	5.45	6.15	7
2.69001	3.08391	3.48766	4.4	5.75	6.6	7.75
2.73417	3.04734	3.35098	4.35	5.4	6.15	7.15
2.15324	2.41479	2.68486	3.65	4.9	5.85	7.15
2.0646	2.52984	2.89993	3.65	5.1	6.1	7.35
2.3452	3.03071	3.31414	4.25	5.55	6.35	8.1
2.60219	3.16766	3.60857	4.65	6.15	6.9	9
2.56692	3.08064	3.70918	4.7	6.25	7	8.85
2.56723	3.15477	3.77663	4.8	6.1	7	8.7
2.79291	3.09571	3.50851	4.75	5.95	6.95	8.6
2.62432	2.75059	3.10994	4.4	5.55	6.5	8.5
2.52312	2.82765	3.29264	4.5	5.8	6.8	8.7
2.27964	2.59348	3.00566	4.05	5.35	6.3	7.8
2.13408	2.35365	2.80749	3.8	4.95	5.9	7.5
2.69386	2.87136	3.24805	4.45	5.9	7.05	8.6
3.38694	3.63489	4.02499	5.3	6.75	7.65	9.1
3.54778	4.03173	4.64963	5.8	7.55	8.2	9.75
3.29967	3.90948	4.59775	5.65	7.45	8.15	9.9
3.0627	3.62982	4.19026	5.3	6.65	7.25	9.3
2.99843	3.45978	3.81595	4.85	6.15	6.55	8.25
2.71071	3.00488	3.53258	4.55	5.75	6.25	7.85
2.76619	3.04503	3.60072	4.8	6.05	6.95	8.55
2.95845	3.06538	3.52041	4.95	6.05	7	8.5
2.43836	2.60133	3.19395	4.45	5.65	6.35	8.2
2.5143	3.13236	3.66302	4.7	6.35	7.15	8.95
2.9014	3.61152	4.03242	5.2	6.95	8.15	9.65
2.8793	3.26205	3.70658	4.9	6.35	7.4	8.75
2.62027	2.96321	3.4544	4.6	5.85	6.8	8.3
2.80476	3.14071	3.68352	4.85	6.1	6.95	8.5
2.9631	3.22261	3.7954	4.95	6.1	6.5	8.05
2.67138	3.03073	3.54662	4.8	6.05	6.65	8.15
2.58112	2.99354	3.49003	4.8	6.15	7.45	8.65
2.73894	3.31467	3.8739	5	6.5	7.8	9.35
3.12558	3.77905	4.58792	5.6	7.3	8.5	10.45
2.92793	3.50599	4.29318	5.3	6.95	8.2	9.95
2.42019	2.90926	3.39729	4.45	6.05	6.9	8.4
2.34432	2.85147	3.43947	4.55	6.2	6.7	7.95
2.32463	2.7977	3.47698	4.4	5.9	6.4	7.6
2.31572	2.75465	3.33745	4.1	5.45	6.3	8.15
3.10517	3.5934	4.23419	5.5	7.05	8.05	9.9
3.50396	4.0462	4.67347	6.15	8.05	9.05	10.6
3.36909	4.05169	4.62021	5.85	7.7	8.65	10.45
3.27252	3.88839	4.45127	5.8	7.45	8.2	10.2
2.82663	3.30715	3.80588	5.05	6.8	7.65	9.75
3.01114	3.50289	4.08103	5.1	6.75	7.75	9.65
3.15492	3.74507	4.41586	5.65	7.15	7.95	10.15
2.89933	3.52866	4.25009	5.7	7.25	7.8	10.1
2.9336	3.45886	4.07035	5.5	7.05	7.75	9.2
3.07272	3.47634	3.89779	5.3	6.7	7.5	9.65
3.61182	3.92089	4.50977	6.05	7.3	7.95	10.95
3.35754	3.75007	4.3531	5.7	7.35	8.2	10.65
2.49151	2.99987	3.4644	4.6	6.4	7.35	9.6
2.58129	3.21557	3.62032	4.75	6.2	7.4	9.4
3.14308	3.82421	4.36884	5.45	6.95	8.2	10.25
3.35047	3.99811	4.63835	5.8	7.4	8.45	10.3
3.69373	4.35787	4.83282	5.95	7.8	8.85	10.45
3.59791	4.17694	4.70903	5.65	7.6	8.5	10.5
3.0405	3.5924	4.31236	5.25	7.05	8.15	10.6
2.99683	3.7502	4.59387	5.75	7.55	8.7	11
2.9095	3.59054	4.31033	5.5	7.3	8.25	10.6
2.75423	3.3239	3.83246	4.95	6.75	7.35	9.5
3.02833	3.68671	4.17737	5.45	7.2	7.8	9.3
3.293	3.75354	4.24018	5.6	7.25	8	9.2
2.7624	2.9976	3.54548	4.8	6.05	6.55	7.65
2.36928	2.50059	2.87162	4.05	4.95	5.55	6.65
2.16757	2.39008	2.59138	3.65	4.65	5.35	6.4
2.15587	2.58393	2.89618	3.95	5.2	5.8	7
2.32412	2.70295	3.06261	4.05	5.25	5.75	6.65
2.19033	2.55785	2.87537	3.8	5.05	5.7	6.65
2.09339	2.49531	2.91692	3.8	5.2	6	7.2
2.51476	2.94638	3.34529	4.4	5.55	6.4	7.75
3.18422	3.56305	4.16391	5.35	6.65	7.6	9.15
2.95911	3.43616	4.22232	5.25	6.9	7.65	9.2
2.73614	3.37096	3.86587	4.85	6.6	7.7	9.3
2.87199	3.54894	4.16733	5.2	7	8.35	10.15
2.56374	3.15838	3.80474	4.85	6.45	7.5	9.65
2.04742	2.39547	2.85857	3.8	5.1	6.1	8.45
2.20564	2.6549	3.26306	4.15	5.65	6.4	7.9
2.39332	2.93179	3.54465	4.3	6.1	7	7.95
2.26842	2.74221	3.29318	3.95	5.55	6.8	7.85
2.49922	3.05612	3.62862	4.4	5.9	7	8.4
2.40491	3.01177	3.51124	4.4	5.9	6.95	8.35
1.95949	2.43278	2.81297	3.65	4.95	6.05	7.3
1.82503	2.19919	2.57708	3.35	4.55	5.6	7.3
2.46568	2.84294	3.37935	4.05	5.05	5.95	7.3
2.72487	3.33533	3.87173	4.65	5.8	6.65	7.6
2.47738	3.24234	3.71056	4.65	6.05	7.05	8.4
2.65383	3.3222	3.81634	4.75	6.15	7.25	8.8
2.63906	3.15608	3.72515	4.6	6	7.2	8.7
2.35704	2.85087	3.54341	4.35	5.6	6.7	8.45
2.26249	2.87246	3.61392	4.5	5.9	6.55	8.05
2.25656	2.78171	3.44958	4.35	5.95	6.6	8.55
2.23948	2.70718	3.43164	4.4	6.05	6.75	8.9
2.26464	2.73899	3.32366	4.4	5.8	6.55	8.15
2.41345	2.97223	3.43089	4.4	5.95	6.85	8
2.75713	3.38239	4.03057	4.85	6.75	7.6	8.85
3.12555	3.66221	4.32687	5.2	6.65	7.5	9.45
3.0927	3.44388	4.06297	5.15	6.2	7.15	8.85
2.74453	3.04903	3.5934	4.85	6.1	7.15	8.55
2.80836	3.24502	3.68285	4.9	6.35	7.4	8.95
2.72802	3.12769	3.62835	4.7	6.05	6.9	8.3
2.55967	2.94314	3.49378	4.45	5.9	6.65	8.35
2.58359	2.94667	3.38644	4.35	6	6.6	8.2
3.03527	3.58441	4.01693	5.2	6.85	7.4	8.9
3.44903	4.16727	4.89842	6.15	7.75	8.65	10.55
2.97925	3.58906	4.2981	5.45	7	7.85	9.55
2.53017	3.09825	3.60594	4.65	6.15	6.75	8.25
2.3194	2.81923	3.28673	4.1	5.55	6.25	7.85
2.46399	3.09245	3.68835	4.6	6.2	7.2	9.05
2.67348	3.27433	4.00205	4.95	6.45	7.3	9
2.24264	2.77103	3.27445	4.05	5.3	6.05	7.65
2.23428	2.83281	3.31119	4.15	5.55	6.25	7.75
2.86654	3.55364	4.08533	4.95	6.7	7.5	8.6
2.79897	3.54606	3.98956	4.8	6.55	7.6	8.85
2.55357	3.18574	3.715	4.55	6.2	7.15	8.65
2.75253	3.38886	4.03746	4.85	6.8	7.6	9.3
2.91364	3.6206	4.31614	5.2	7.15	8.1	9.8
2.80564	3.55004	4.11261	5.15	6.9	7.85	8.85
2.29039	3.00369	3.37393	4.2	5.65	6.6	7.8
2.0387	2.65316	2.96933	3.65	4.9	5.75	7.65
2.21396	2.63167	3.02608	3.85	5.3	6	7.65
2.12723	2.52296	2.99749	3.9	5.55	6.4	7.8
2.16577	2.65171	3.17462	4.05	5.75	6.45	7.8
2.02292	2.61983	3.19527	3.95	5.4	6.25	7.45
1.78712	2.36251	2.94487	3.7	4.8	5.65	6.95
1.75676	2.2172	2.62067	3.4	4.45	5	6.1
1.80133	2.29938	2.54887	3.35	4.7	5.45	6.5
2.29674	2.85289	3.32448	4.2	5.9	6.85	7.9
2.52534	3.14529	3.66171	4.45	5.9	6.6	7.85
2.23895	2.79273	3.26261	4	5.05	6	7.75
2.11826	2.4873	3.10084	3.8	5	6.1	7.55
1.91587	2.31281	2.90776	3.65	4.95	5.5	6.85
1.75098	2.24923	2.67117	3.4	4.45	5.25	6.75
1.65445	2.10587	2.48034	3.2	4.25	5.25	6.4
1.59749	2.01391	2.44731	3.25	4.25	4.9	6.05
1.93156	2.40266	2.70558	3.55	4.55	5.35	6.7
2.45187	3.07553	3.46544	4.3	5.7	6.9	8.15
2.79668	3.34659	3.76312	4.8	6.35	7.45	8.75
3.47096	3.73547	4.00816	5.3	6.85	7.75	9.4
3.52736	3.58876	3.93147	5.35	7.05	7.95	9.8
2.78861	3.03316	3.54615	4.95	6.3	7.15	9.2
2.57121	3.00235	3.65313	4.75	5.85	6.6	8.6
2.7418	2.95363	3.39969	4.35	5.55	6.25	7.9
2.86123	3.05549	3.53005	4.7	5.85	6.55	8.3
3.3855	3.20785	3.58476	5.15	6.45	7.1	9.1
3.86725	3.6472	3.56754	5.1	6.3	7.05	8.7
3.40191	3.5898	3.51781	4.95	6.2	7	8.35
2.69034	2.84429	3.00372	4.55	5.9	6.7	8.3
2.419	2.76095	2.84942	4.2	5.2	6	7.7
2.3763	2.68025	2.82198	3.9	4.8	5.4	6.85
2.26034	2.55601	2.94439	4	5.15	5.7	6.95
2.62446	3.15459	3.55672	4.75	6.05	6.6	7.9
2.68988	3.19373	3.51588	4.7	5.95	6.55	8.2
2.55085	2.9776	3.29099	4.25	5.4	6.3	7.8
2.56101	2.86498	3.33662	4.2	5.1	5.9	7
2.28242	2.65429	3.13851	4.15	5.3	5.95	7.25
1.99958	2.42595	2.78449	3.8	5.15	5.8	7.35
2.10703	2.39738	2.94584	3.9	5.2	5.85	6.9
2.35603	2.72459	3.30245	4.35	5.55	6.15	6.85
2.18566	2.51297	3.04332	4.05	5.2	5.65	6.6
1.72563	1.98533	2.49123	3.3	4.35	5.05	6.45
1.68762	2.04058	2.40579	3.2	4.3	5.4	6.7
1.90112	2.27483	2.75361	3.7	5.1	6	7.15
2.05001	2.43813	2.92109	3.9	5.05	5.8	7.5
2.757	3.31711	3.93731	5	6.55	7.6	8.95
3.46641	4.1188	5.03341	6.2	8.3	9.5	11
3.4526	4.07265	5.00798	6.15	7.95	9.5	11.6
2.85817	3.61967	4.39864	5.65	7.35	9.05	11.35
3.07935	3.80755	4.54829	5.95	7.8	9.25	11.4
3.51404	4.10965	4.95086	6.25	8.15	9.35	10.85
3.14469	3.81705	4.68619	5.95	7.95	8.85	9.9
2.95763	3.5011	4.16927	5.25	7.1	7.85	8.85
2.90637	3.25443	3.90667	4.8	6.45	7.4	8.7
2.65256	3.05947	3.69128	4.8	6.2	7.2	9
2.40119	2.76581	3.2963	4.5	5.55	6.2	8
2.79242	3.10994	3.73792	5.1	6.3	6.95	8.65
3.14225	3.6849	4.38015	5.8	7.6	8.65	10.75
3.35037	4.10998	4.86467	6.15	8.1	9.25	11.4
3.41729	4.27852	5.11458	6.25	8.1	9.2	10.8
3.14672	3.94706	4.78672	5.75	7.6	8.55	9.65
3.12987	3.89614	4.6506	5.65	7.4	8.15	9.4
2.73818	3.4849	4.23062	5.25	6.8	7.9	9.3
2.64875	3.22553	3.89753	4.85	6.35	7.25	8.65
2.6585	3.12998	3.72231	4.55	6.05	6.6	8.45
2.21781	2.67339	3.25196	4.15	5.7	6.5	8.3
2.21556	2.71704	3.3675	4.35	5.95	6.95	8.25
2.5899	3.13545	3.8842	4.75	6.3	7.3	9.1
2.71696	3.32668	3.98996	4.75	6.4	7.35	9.35
2.41321	2.92016	3.48891	4.35	5.9	6.75	8.6
2.33853	2.79213	3.30339	4.45	5.7	6.45	8.3
2.62876	3.18177	3.68327	4.85	6.3	7.15	8.6
2.77817	3.20767	3.73083	4.85	6.35	7.1	8.5
2.46483	2.728	3.32603	4.3	5.65	6.35	7.9
2.28128	2.77021	3.45467	4.25	5.65	6.35	7.8
2.38559	2.92371	3.71503	4.5	5.95	6.45	7.7
2.09809	2.53463	3.16674	4	5.3	5.95	7.2
2.17528	2.73329	3.26523	4.1	5.35	6.4	7.65
2.56746	3.16902	3.90746	4.75	6.35	7.75	9.15
2.60247	3.20898	3.87846	4.85	6.55	7.9	9.6
2.67958	3.19676	3.81526	4.75	6.35	7.25	8.95
2.76987	3.25995	3.92021	4.8	6.5	7.2	8.85
2.89417	3.46194	4.1293	5.25	6.9	7.7	9.35
2.60253	3.12484	3.668	4.8	6.1	7.15	8.45
2.62912	3.21262	3.57533	4.55	5.8	6.5	7.8
2.64974	3.23203	3.67772	4.7	5.95	6.45	8.3
2.73137	3.04159	3.53103	4.8	6.05	7.05	8.8
3.43078	3.85297	4.36836	5.85	7.25	8.15	10.2
3.7895	4.40768	5.03264	6.55	8.05	9	11.85
3.92493	4.46403	5.05539	6.7	8.05	9.35	12.65
3.67308	4.14464	4.88637	6.3	7.95	9.35	12.45
3.3341	3.8154	4.49152	5.75	7.7	8.9	11.25
3.33404	3.80522	4.39268	5.85	7.65	8.7	10.9
3.61173	4.33595	5.17905	6.6	8.6	9.85	12.45
4.07319	4.90746	5.77171	7.2	9.4	10.55	13.7
3.74467	4.34404	5.1456	6.55	8.85	9.6	12.15
3.2034	3.61091	4.30977	5.7	7.75	8.45	10.3
3.45366	3.88801	4.62315	6.1	7.9	8.95	10.75
3.11114	3.62104	4.4107	5.65	7.4	8.4	9.85
2.47875	2.88742	3.44045	4.5	5.8	6.5	7.9
2.51649	2.91355	3.27614	4.4	5.75	6.45	8.5
3.05188	3.51714	4.09028	5.35	6.85	7.8	9.75
3.46339	3.96942	4.72519	6.15	7.3	8.15	10.1
3.01455	3.57341	4.17931	5.6	6.75	7.5	9.6
2.8808	3.33183	3.77859	5.1	6.55	7.7	9.75
2.79384	3.1117	3.48795	4.8	6.35	7.65	10
2.78023	3.15141	3.54524	4.95	6.4	7.45	9.4
2.72396	3.08898	3.53334	4.9	6.3	7.15	9
2.27096	2.58972	3.06686	4.25	5.4	6.35	8.25
2.49624	2.84715	3.13346	4.35	5.45	6.55	8.15
2.71168	3.32141	3.75612	4.95	6.4	7.35	9
2.78777	3.43719	4.28973	5.3	7.05	8.05	10.1
2.98345	3.45069	4.35373	5.35	7.35	8.45	10.6
3.01379	3.39998	4.31619	5.35	7.35	8.45	10.2
2.57844	2.96487	3.67201	4.65	6.2	7.3	8.85
2.34517	2.78193	3.23863	4.15	5.25	6.5	8.3
2.52017	3.01595	3.48001	4.4	5.75	6.85	8.6
2.28911	2.75875	3.25084	4.1	5.8	6.5	7.75
2.33492	2.77988	3.30228	4	5.45	6.1	7.05
2.43947	2.96183	3.48348	4.15	5.4	6	7.4
2.46096	2.94939	3.5036	4.4	5.7	6.3	7.75
2.3335	2.7826	3.33147	4.25	5.5	6.15	7.65
2.35298	2.96612	3.59276	4.45	5.9	6.75	8.5
2.61077	3.32259	4.05365	5.05	6.55	7.7	9.1
2.46673	3.05661	3.75087	4.75	6.1	7.2	8.5
2.54522	2.99684	3.71135	4.75	6.35	7.6	8.9
2.65031	3.16255	3.95532	5	6.75	8	9.15
2.82638	3.47089	4.12528	5.05	6.6	7.25	8.8
2.9723	3.64181	4.22395	5.25	7	7.95	9.85
2.89896	3.48038	4.13964	5.25	7.05	8.25	9.6
2.84375	3.35152	3.95384	5	6.4	7.25	8.65
2.78492	3.24138	3.79855	4.95	6.25	7.3	9.1
2.41496	2.87609	3.42764	4.45	5.65	6.8	8.35
2.32526	2.97361	3.53738	4.4	5.75	6.95	8.45
2.47243	3.15291	3.74322	4.6	6	7.25	8.7
2.16345	2.7333	3.20528	3.95	5.25	6.25	7.55
2.29351	2.75778	3.25845	4.05	5.5	6.45	7.45
2.20213	2.5449	3.06715	3.95	5.5	6.4	7.15
2.1231	2.48326	2.91532	3.8	5.15	5.85	7
2.16384	2.6081	3.07105	3.95	4.9	5.5	6.7
1.78203	2.13125	2.48812	3.35	4.2	4.55	5.45
1.65735	1.92035	2.20894	3	4.1	4.55	5.65
1.682	2.05688	2.45164	3.25	4.65	5.5	6.7
2.07699	2.48366	2.85221	3.7	4.95	5.8	7
2.26666	2.66121	3.05372	4.05	5.25	6	7.1
2.08298	2.56669	3.00548	4.15	5.45	6.15	6.95
2.14007	2.61029	2.91767	3.8	5.15	5.95	6.95
2.22435	2.727	3.16557	3.9	5.4	6.6	8.35
2.51198	3.03931	3.7771	4.7	6.45	7.8	9.6
2.82734	3.47049	4.21952	5.2	7	8.4	9.75
2.82818	3.51946	4.1759	5.1	6.55	7.95	9.65
2.6287	3.23029	3.84438	4.75	6.4	7.45	9.25
2.70679	3.31932	3.91648	4.95	6.75	7.75	9.3
2.97483	3.62158	4.2963	5.55	6.95	7.9	9.25
2.62385	3.0865	3.73153	4.9	6.2	7.1	8.8
2.50378	2.84822	3.50017	4.65	6.35	7.5	9.4
2.4682	2.93697	3.66362	4.8	6.5	7.7	9.45
2.59334	3.08424	3.73608	4.85	6.35	7.4	8.95
3.0997	3.65674	4.18645	5.2	6.7	7.5	9
3.14224	3.692	4.12049	5	6.3	7	8.65
2.93869	3.34157	3.78309	4.9	6.15	7.05	8.45
2.5973	2.90673	3.38	4.4	5.55	6.45	7.85
2.47273	2.89048	3.47245	4.25	5.55	6.25	7.25
2.58183	3.10767	3.7724	4.55	6.05	6.95	7.9
2.46702	2.96618	3.56911	4.4	5.8	6.9	8.55
2.30283	2.81671	3.46113	4.3	5.65	6.55	8.35
2.05379	2.59118	3.17186	4	5.4	6.45	7.7
1.91214	2.51432	2.91686	3.65	5.05	6	7.05
1.78452	2.30099	2.63632	3.25	4.55	5.45	6.7
1.6851	2.00107	2.36096	3.05	4.3	5.2	6.4
1.92267	2.23246	2.71568	3.6	4.6	5.25	6.1
2.24603	2.6896	3.12974	4	4.9	6.05	7.5
2.58705	3.09255	3.54213	4.5	5.75	7	9.05
2.56934	3.06576	3.68485	4.75	6.3	7.1	8.6
2.63556	3.16094	3.81593	4.85	6.3	7.2	8.4
2.72631	3.22234	3.85236	5	6.3	7.55	9.2
2.70999	3.06787	3.55259	4.8	6.25	7.65	9.65
2.98124	3.2184	3.86152	5.05	6.75	7.9	9.65
3.27842	3.60454	4.48552	5.55	7.25	7.95	9.9
3.09248	3.49318	4.14458	5.25	7.05	7.9	9.9
3.17802	3.53801	3.89622	5.2	7.05	8.25	10.15
5.16467	4.94477	4.9435	6.55	8.15	9.25	10.95
3.60048	4.03856	4.46171	6.15	7.9	8.95	10.5
2.8828	3.38251	3.7853	5.35	6.95	8.05	10.1
2.74751	3.0759	3.43741	5	6.35	7.5	9.7
2.7527	3.11592	3.56901	5	6.5	7.5	9.75
2.92662	3.37804	3.84808	5	6.7	7.75	9.65
3.03559	3.51364	3.98633	4.95	6.6	7.75	9.25
3.11944	3.48688	3.947	4.95	6.35	7.5	8.8
2.80547	3.02127	3.50284	4.65	5.8	7.05	8.55
2.66687	3.05168	3.40452	4.7	6.25	7.4	8.9
2.95429	3.38205	3.71859	5.15	6.9	7.45	8.7
2.67865	3.12536	3.65412	4.9	6.35	6.85	8.15
2.62446	3.13974	3.65119	4.6	5.9	6.6	7.95
2.83221	3.28483	3.74036	4.8	6	6.85	8.35
2.84175	3.2848	3.75998	4.95	6.15	7.05	8.45
2.70953	3.09278	3.45757	4.8	6	6.85	8.05
2.47848	2.81674	3.10044	4.3	5.35	6.2	7.45
2.33296	2.7563	3.05184	3.95	5.15	5.85	7.35
2.75182	3.14267	3.55613	4.95	6.55	7.1	8.5
2.99069	3.41005	4.07537	5.65	7.3	8.05	9.85
2.73727	3.36072	4.02727	5.25	6.55	7.85	10.75
2.5951	3.22656	3.71363	4.8	6.15	7.5	10.05
2.8934	3.46756	4.05731	5.05	6.7	7.75	9.2
2.82786	3.47653	4.11281	5.15	6.6	7.6	8.6
2.28077	2.9302	3.48809	4.35	5.6	6.5	7.65
2.15113	2.61212	3.14901	3.95	5.35	6.05	7.3
1.90962	2.25185	2.59689	3.35	4.75	5.45	6.5
2.01892	2.49197	2.80062	3.55	4.6	5.7	6.9
2.18488	2.79145	3.21282	4.15	5.15	6.15	7.9
2.32154	2.94295	3.39214	4.35	5.75	6.65	8.5
2.56694	3.15969	3.74557	4.7	6.25	7.3	8.75
2.43767	2.99589	3.55228	4.45	6.05	7	8.55
2.42589	2.92244	3.40821	4.2	5.85	6.65	8.45
2.57441	2.9811	3.49243	4.3	5.75	6.4	8.15
2.67466	3.10357	3.70123	4.65	5.95	6.55	8
2.8426	3.33833	4.06755	5	6.5	7.1	8.7
2.55696	3.00855	3.67141	4.55	6.1	7.05	8.8
2.14577	2.61296	3.21626	4.05	5.65	6.6	7.85
2.05602	2.5602	3.25176	4.15	5.55	6.25	7.95
2.14031	2.57025	3.09612	4	5.2	6.05	7.85
2.77372	3.24774	3.70655	4.75	6.2	7.1	8.45
3.03518	3.66903	4.25814	5.45	7	7.8	9.2
2.37287	2.95198	3.41511	4.4	5.85	6.55	7.85
1.80796	2.3665	2.74662	3.7	5	6.1	7.65
2.14508	2.61171	3.06771	4.15	5.5	6.85	8.55
2.87231	3.346	4.06788	5.25	7.1	8.15	9.9
3.67199	4.35764	5.1895	6.45	8.4	9.25	11.2
3.82593	4.34366	5.1161	6.5	8.25	9.2	11.45
3.12646	3.59681	4.30285	5.7	7.2	8.3	10.65
3.20437	3.56649	4.25022	5.6	6.8	7.8	9.85
3.06596	3.27824	3.89056	5.3	6.55	7.95	10.15
2.86441	3.12056	3.50184	4.95	6.25	7.55	9.45
2.98815	3.31559	3.601	5	6.35	7	8.7
2.7333	3.30767	3.83666	5.1	6.75	7.55	9.45
2.40132	3.07519	3.71352	4.75	6.55	7.45	9.1
2.41675	3.00549	3.60394	4.55	6.3	7.25	8.8
2.50336	3.01906	3.69528	4.8	6.6	7.65	9
2.64406	3.12299	3.54738	5	6.55	7.4	8.6
3.04972	3.46233	3.83517	5.2	6.75	7.4	8.4
2.75142	3.26453	3.69153	4.75	6.15	7.15	8.2
2.47668	3.02717	3.44525	4.4	5.65	6.85	8.15
2.20849	2.63498	3.18848	4.1	5.4	6.25	7.75
2.34909	2.84925	3.45578	4.45	5.7	6.75	8.4
2.52768	3.0148	3.55786	4.55	6.05	7.35	9.2
2.25919	2.73037	3.23833	4.2	5.9	6.8	8.6
2.22353	2.74282	3.39164	4.3	6.1	6.85	8.4
2.79278	3.34212	4.04774	4.95	6.75	7.6	9.25
2.96054	3.62727	4.19086	5.15	7	8	9.8
2.65892	3.31138	3.88279	4.8	6.55	7.6	9.4
2.87545	3.39588	4.1729	5.15	6.85	7.65	9.05
2.5759	3.0476	3.70795	4.8	6.3	6.9	8.1
2.24524	2.6146	3.06264	4.15	5.4	6	7.65
2.42057	2.72973	3.2792	4.4	5.65	6.4	8
2.44458	2.77893	3.31086	4.35	5.55	6.55	8
2.34687	2.65821	3.17865	4.25	5.5	6.5	8
2.44302	2.8189	3.36359	4.5	5.8	6.3	7.8
2.39477	2.8346	3.31501	4.3	5.65	6.25	8.3
2.18211	2.64952	3.117	4	5.4	6.35	7.95
2.02973	2.43825	2.86257	3.65	4.9	5.8	6.65
1.88552	2.31382	2.73431	3.55	4.6	5.35	6.4
2.18128	2.74515	3.20851	4.1	5.3	6.2	7.55
2.68151	3.21177	3.843	4.7	6	7.15	8.75
2.70676	3.21143	3.9033	4.85	6.05	7.1	8.2
2.34962	2.84281	3.42115	4.35	5.55	6.55	7.85
2.48018	2.96925	3.66329	4.8	6.35	7.3	9.25
3.01003	3.47307	4.42675	5.75	7.8	8.7	10.8
3.23199	3.7152	4.47065	5.75	7.9	8.9	11.4
3.22866	3.79965	4.44491	5.6	7.6	8.75	10.95
3.02866	3.61874	4.36222	5.35	7.35	8.15	9.35
2.88726	3.54232	3.99903	5.1	6.75	7.05	8.1
2.45449	3.02904	3.42192	4.7	5.85	6.7	8.6
2.25259	2.80577	3.33911	4.65	5.9	7.3	9.25
2.38094	2.96498	3.52431	4.65	6.15	7.2	8.65
2.07302	2.54577	3.0727	4	5.55	6.35	7.85
2.23163	2.72322	3.09513	4	5.5	6.45	8.25
2.34918	2.80742	3.15291	4.05	5.35	6.25	8.2
2.1876	2.65016	3.15332	4.1	5.45	6.15	7.7
2.47417	3.14969	3.7326	4.95	6.3	6.95	8.2
2.90621	3.66064	4.11334	5.45	6.9	7.8	9.2
2.59384	3.11909	3.51654	4.8	6.05	7.15	8.65
2.45394	2.72864	3.15902	4.5	5.9	7.05	8.6
3.14363	3.34653	3.6414	5.05	6.65	7.75	8.95
3.42247	3.51681	3.74142	5.35	6.7	7.8	9.7
3.59888	3.65437	4.17386	5.95	7.45	8.65	11.15
4.10199	4.28585	4.84727	6.35	7.9	8.95	10.8
3.76447	4.18853	4.53872	5.85	7.4	8.35	10
3.05465	3.53861	3.96453	5.25	6.6	7.55	9.45
2.83198	3.20534	3.80809	4.85	6.15	7.05	8.9
2.63285	3.05043	3.89274	5.05	6.45	7.5	9.15
2.93108	3.45716	4.2384	5.75	7.4	8.6	10.25
3.24282	3.81321	4.44847	5.8	7.6	9.15	10.9
3.35941	4.11269	4.80235	6	7.6	8.95	10.9
3.11364	3.89552	4.45372	5.65	7.1	8.2	10
2.78035	3.34483	3.76885	4.8	6.25	7.55	9.7
2.94397	3.49184	3.98583	5.05	6.4	7.85	10.6
3.58458	4.31758	5.04397	6.35	7.85	9.15	11.4
3.53884	4.2109	5.12161	6.55	8.25	9.25	11.3
2.9852	3.43787	4.17923	5.65	7.4	8.65	10.85
2.96067	3.31321	3.99713	5.35	7.1	8.25	9.8
2.89211	3.28433	3.89487	5.1	6.55	7.35	8.7
2.98376	3.54657	4.05473	5.3	6.7	7.95	9.75
3.29041	3.83502	4.43274	5.7	7.35	8.65	10.65
3.49084	3.98484	4.48745	5.7	7.4	8.15	10.1
3.12952	3.4954	3.88975	5.15	6.65	7.4	9.15
2.80247	3.13731	3.50795	4.8	6.15	6.9	8.65
2.66514	3.10679	3.5499	4.75	6	6.65	8.3
2.94463	3.2796	3.62535	5	6.4	7.05	8.65
3.18303	3.53803	3.79462	5.15	6.4	7.25	9.3
3.80802	4.05817	4.34947	5.7	6.95	7.8	10.2
4.53156	4.72502	4.95761	6.6	8.2	9.05	11.95
3.87395	4.10339	4.44579	6.35	8.05	9.25	11.95
3.30311	3.63888	4.14393	5.95	7.8	9	10.95
2.87343	3.57926	4.18902	5.65	7.3	8.15	9.7
2.92462	3.63802	4.20552	5.5	6.95	7.55	8.95
3.21662	3.70381	4.33722	5.85	7.45	8.05	9.45
3.24026	3.4089	4.17056	6	7.6	8.7	10.2
3.73309	3.74631	4.06579	6.05	7.55	8.65	10.85
3.62927	3.76634	3.84281	5.65	7.25	8	10.85
3.89593	4.02731	4.65353	6.25	7.85	8.9	11.25
4.96284	4.8523	5.4062	7.1	8.65	9.75	11.45
4.55995	4.27428	4.47273	6.1	7.8	8.95	10.65
4.21799	3.92076	4.15831	5.55	7.35	8.75	10.35
4.03668	3.83093	4.11091	5.55	7.25	8.4	10
3.88693	3.59882	3.96609	5.65	6.9	7.9	9.7
3.81388	3.75171	4.11736	5.8	6.95	8.05	9.85
3.00909	3.40863	3.90938	5.6	6.95	8.05	9.75
2.70146	3.10296	3.71285	5.35	6.7	7.85	9.6
3.3352	3.53745	3.94314	5.2	6.5	7.45	9.05
3.21081	3.45174	3.9036	4.9	6.1	6.9	8.4
3.07193	3.53283	4.29006	5.3	6.8	7.75	9.45
3.38322	3.84993	4.60923	5.7	7.55	8.75	11.35
3.03868	3.39215	4.23316	5.6	7.65	8.85	11.85
3.03255	3.30097	4.31094	5.7	7.35	8.5	11.1
3.20861	3.6437	4.47695	5.7	7.2	8.35	10.65
3.13421	3.62964	4.35451	5.55	7.35	8.45	10
2.92592	3.53157	4.21314	5.35	7.15	8.3	9.55
3.11102	3.87586	4.50917	5.65	7.45	8.2	10
3.26084	3.84273	4.53853	5.7	7.3	7.8	9.8
3.2376	3.59231	4.3342	5.6	7.35	8.2	10.35
3.7525	4.13872	4.85834	6.05	7.8	8.9	11.35
4.61771	4.92739	5.70001	7.35	9.1	9.95	12.5
4.6944	5.23999	5.88116	7.9	9.85	10.65	13.45
4.41442	5.32068	5.80933	7.3	9.55	10.5	12.85
3.92968	4.5476	5.28073	6.7	9.05	9.95	12.2
3.60137	4.23488	4.97008	6.35	8.5	9.4	12.35
3.68573	4.47811	5.15289	6.4	8.4	9.45	12.25
4.14844	4.9747	5.74396	7	9.05	10.3	12.6
4.04405	4.69907	5.70274	6.9	9.1	10.45	12.8
3.19003	3.62676	4.4489	5.65	7.45	8.85	11.1
3.03616	3.53576	4.07543	5.2	6.7	8.05	9.95
3.37272	4.08184	4.8253	5.95	7.55	8.65	10.65
3.36973	4.06622	4.99927	6.35	7.8	9	11.05
2.95039	3.43076	4.07839	5.5	6.8	7.9	9.8
2.92419	3.30893	3.83159	5.35	6.9	7.9	9.95
3.12508	3.52267	4.18186	5.8	7.4	8.3	10.05
3.08557	3.20948	3.66517	5.25	6.65	7.45	9.05
3.12669	3.16251	3.4966	5	6.2	7.2	9.5
3.66072	3.96049	4.33995	5.9	7.25	8.25	10.55
3.65731	3.81894	4.20461	5.95	7.55	8.5	10.2
3.10895	3.17939	3.56473	5.1	6.5	7.4	8.9
2.69926	2.68268	3.18544	4.3	5.6	6.75	8.4
5.70345	5.36118	5.14622	6.5	8.15	8.95	10.35
4.16077	4.03125	4.27983	5.8	7.35	8.3	9.7
2.87287	3.02166	3.61062	5	6.25	7.25	8.95
3.27577	3.61735	4.1058	5.75	7.1	8.25	9.9
3.70703	4.08061	4.60194	6.4	7.7	8.6	10
3.47564	3.93314	4.43209	6.05	7.25	7.95	10.3
3.37126	3.87043	4.53565	6.1	7.5	8.2	11.05
3.26284	3.81964	4.49391	5.85	7.65	8.5	10.3
3.05369	3.71164	4.27953	5.5	7.75	9	10.85
3.03437	3.70053	4.26632	5.55	7.55	8.55	10.65
2.64018	3.17914	3.55345	4.65	6.2	7.05	9.2
2.52562	2.99891	3.42843	4.65	6.15	7.25	9.85
2.91314	3.47237	4.12634	5.35	6.95	7.95	10.1
2.75173	3.24432	3.86808	5.05	6.8	7.7	8.9
2.34207	2.73554	3.27399	4.55	5.95	6.75	7.45
2.15278	2.37107	2.86687	4	5.1	5.95	6.9
2.11369	2.31075	2.8593	3.9	5.25	6.3	7.7
2.10558	2.51343	3.10835	4.1	5.7	6.55	7.9
2.55459	2.98363	3.67653	4.6	6.3	7.15	8.7
2.61054	3.12426	3.85164	4.85	6.35	7.15	9.15
2.27837	2.81887	3.25032	4.55	5.7	6.4	8.45
2.69243	3.10806	3.52734	4.75	5.9	6.8	8.5
2.7678	3.02391	3.5219	4.5	5.85	6.75	8.55
2.53082	2.70729	3.08865	4.2	5.6	6.55	8.25
2.45405	2.68602	3.13338	4.45	5.75	6.8	8.3
2.99959	3.24835	3.8984	5.35	6.95	7.85	9.65
3.26177	3.48258	3.87918	5.3	6.95	7.3	9.05
3.04938	3.20151	3.10405	4.25	5.2	5.55	7
2.84041	3.05942	3.0562	3.8	4.55	5.2	6.3
2.20829	2.31916	2.5019	3.1	4.1	4.65	5.6
2.14721	2.05776	2.19843	3.3	4.45	5	6.5
2.93388	3.0172	3.18222	4.5	5.7	6.3	8.55
3.78572	4.12827	4.72698	6.15	7.7	8.4	11
4.06171	4.1825	4.82561	6.5	8.4	9.5	11.35
4.07991	4.05628	4.50788	6.2	7.85	8.9	10.4
3.9874	4.38819	5.1327	6.75	8.25	8.9	11
3.84762	4.38405	5.12908	7	8.7	9.55	11.9
3.50237	4.00536	4.73457	6.7	8.55	9.45	11.8
3.48059	4.06703	4.74857	6.4	8.45	9.5	12.1
3.81554	4.35705	4.98263	6.45	8.75	9.9	12.05
3.551	4.22919	4.57904	5.75	7.75	8.7	10.45
3.38086	4.13622	4.45535	5.6	7.15	8.1	10.25
3.51173	4.11536	4.8886	6.1	7.8	8.7	10.45
3.08188	3.4969	4.08297	5.3	6.9	7.85	9.6
2.79927	3.09074	3.43548	4.7	6.05	7	9
2.91668	3.25638	3.57961	4.65	6.2	7.1	8.75
2.94811	3.48361	4.02316	5	6.95	8.1	10
3.3606	3.98872	4.83165	6	8.5	9.95	11.9
3.56045	4.1004	4.83604	6.15	8.25	9.5	11.55
3.77272	4.21865	5.00504	6.4	7.95	8.75	10.65
3.77476	4.20758	5.07792	6.55	8.5	9.25	11
3.25149	3.62792	4.47079	5.95	7.85	8.85	10.9
3.019	3.3667	4.17398	5.7	7.4	8.55	10.2
2.73901	3.13568	3.86183	5.25	6.65	7.7	9.4
2.27544	2.57311	3.15126	4.25	5.3	6.35	8.4
2.44153	2.61678	3.02216	4.1	5.2	6.35	8.2
2.95473	3.04698	3.59851	4.5	5.8	7	8.5
3.21366	3.50714	3.98686	4.85	6.35	7.3	8.9
3.21625	3.83947	4.27744	5.35	6.95	7.6	8.95
2.94053	3.40732	3.97574	5.1	6.7	7.3	8.6
2.7007	3.04817	3.50939	4.55	5.9	6.35	7.4
2.66937	3.05556	3.51268	4.65	5.9	6.4	7.45
3.05036	3.54448	4.18068	5.5	7.35	8.3	10.45
3.6744	4.3683	5.16486	6.7	8.65	9.85	12.35
3.66697	4.43728	5.20308	6.8	8.55	9.55	11.9
2.96078	3.59084	4.40064	5.8	7.45	8.6	11.1
2.82222	3.44458	4.25229	5.45	7	8.3	10.75
3.17551	3.88865	4.67746	5.75	7.5	8.3	9.95
2.88137	3.31411	4.00282	5.15	6.5	7.1	8.45
2.70047	3.04596	3.62569	4.9	6.35	7.4	9.45
2.59258	3.06802	3.70332	4.95	6.5	7.4	9.35
2.08405	2.56244	3.05537	4.15	5.3	5.75	7.45
2.21045	2.73167	3.20151	4.3	5.9	6.6	8.4
2.83603	3.48605	4.0497	5.15	7.05	8.15	9.85
2.86773	3.57966	4.18095	5.15	6.7	8	9.7
2.67004	3.34493	3.99888	4.9	6.35	7.7	9.55
2.84189	3.48222	4.11681	5	6.5	7.8	9.85
2.95496	3.57137	4.1672	5.1	6.7	7.95	9.85
2.88622	3.627	4.04213	5.05	6.65	7.8	9.6
2.63894	3.35748	3.74919	4.75	6.35	7.45	9.1
2.18939	2.77443	3.24864	4.05	5.75	6.9	8.6
1.94235	2.46343	2.88006	3.6	5	6.25	8.05
2.08379	2.6297	3.05868	3.85	5.1	6.3	8.1
2.44669	3.16044	3.73072	4.5	5.95	6.95	8.75
2.45013	3.06981	3.7661	4.55	5.95	6.8	8.2
1.94553	2.31362	2.85154	3.6	4.7	5.45	6.5
1.58547	1.88059	2.27821	2.95	4.1	4.8	5.9
1.7543	2.1852	2.73762	3.6	4.95	5.5	6.75
1.89326	2.422	2.95926	3.8	5.1	5.55	6.7
1.96803	2.53121	3.06673	3.8	5.15	5.75	7.05
2.2541	2.80748	3.51346	4.4	5.95	6.8	8.1
2.3038	2.93193	3.57149	4.45	6.15	7.1	8.2
2.32044	2.93122	3.44572	4.2	5.75	6.8	7.85
2.29199	2.78585	3.25361	3.95	5.1	6.25	7.4
2.14142	2.68384	3.22479	3.95	5	5.9	7.05
2.16735	2.78989	3.29835	4.1	5.4	6.05	7.7
2.32908	2.90888	3.33777	4.2	5.6	6.6	8.3
2.24101	2.64786	3.23995	4	5.25	6.25	7.4
1.961	2.36612	2.91017	3.5	4.75	5.6	6.55
2.03129	2.59541	2.99957	3.6	5.1	5.9	7
2.28427	2.8266	3.35713	4.25	5.9	6.55	7.55
2.1916	2.66596	3.20075	4.15	5.6	6.45	7.6
1.79716	2.25801	2.71504	3.45	4.35	5.45	7
1.8224	2.20502	2.73482	3.4	4.35	5.4	6.65
2.21406	2.63028	3.18205	3.9	5.3	6.2	7.4
2.52248	2.91624	3.58126	4.4	6	6.8	7.9
2.73758	3.26727	3.94552	4.85	6.25	7.15	8.5
2.82894	3.4881	4.10784	5	6.6	8	9.5
2.95254	3.66598	4.2478	5.2	7.15	8.65	10.65
3.03476	3.81697	4.30822	5.35	7.05	8.2	10.3
2.89493	3.59728	4.1638	5.2	7	8.05	9.95
3.0194	3.66701	4.24896	5.6	7.55	8.7	10.8
3.35941	4.00876	4.72145	6.2	7.95	9.15	11.05
3.28388	3.99589	4.71069	6.05	7.75	8.95	11.2
3.25667	3.88996	4.44528	5.9	7.8	8.9	11
3.80891	4.23078	5.10622	6.65	8.5	9.4	11.3
4.19589	4.43677	5.17467	6.65	8.3	9.25	11.35
3.99723	3.96202	4.51939	6.1	7.8	8.95	10.95
3.36787	3.27657	3.92084	5.65	7.5	8.5	10.25
3.22808	3.18236	3.7239	5.25	6.85	7.85	9.35
3.19396	3.23898	3.65739	4.9	6	7	8.8
2.91131	3.38023	3.72688	4.8	6.05	6.8	8.55
2.685	3.24409	3.79005	4.75	6.3	7.05	8.6
2.51139	2.99179	3.52358	4.5	5.85	6.7	8.15
2.18468	2.60628	2.99411	4.1	5.25	6.1	7.55
2.01914	2.42023	2.51098	3.8	4.85	5.55	7.3
2.26524	2.65107	2.65641	3.9	4.85	5.4	7.05
2.80506	3.06517	3.19009	4.15	5.1	5.8	7.4
2.99259	3.15555	3.47175	4.65	5.7	6.7	8.55
3.01085	3.27152	3.71817	5.25	6.6	7.7	9.05
3.56938	4.01229	4.38577	6	7.75	8.8	10.2
3.24797	3.59278	4.01312	5.75	7.4	8.65	10.9
2.78835	3.07265	3.56862	5.15	6.55	7.7	9.75
2.55128	2.93358	3.44583	4.75	6.2	7.2	8.65
2.50713	3.04486	3.1424	4.5	6	6.95	8.45
2.58822	3.00686	3.06894	4.4	5.85	6.7	8
2.25486	2.49011	2.76996	3.9	5.2	6	6.95
2.61189	2.93616	3.11328	4.5	5.95	6.65	8.1
3.10165	3.55047	4.05219	5.5	7.05	7.95	9.7
3.06702	3.5843	4.26142	5.4	7.05	7.95	9.8
3.11679	3.64811	4.1817	5.3	7	7.6	9.25
2.54802	2.95908	3.49294	4.7	6.25	6.8	8.25
2.1613	2.61215	3.06935	4.15	5.65	6.3	7.7
2.39581	2.96498	3.36049	4.2	5.55	6.4	7.65
2.35412	2.75449	3.1094	4.05	5.5	6.6	7.9
2.38895	2.68381	2.92023	4.1	5.25	6.15	7.5
2.47986	2.76994	3.20613	4.35	5.3	5.85	7.2
2.40478	2.81756	3.39563	4.5	5.7	6.1	7.55
2.32152	2.82071	3.24655	4.5	5.7	6.45	8.2
2.30148	2.59636	3.0787	4.3	5.65	6.8	8.8
2.60534	2.98945	3.5704	4.65	6.5	7.4	9
2.93176	3.58007	4.13891	5.3	7.05	7.85	9.15
2.63919	3.25992	3.67027	5	6.15	7.1	9.3
2.72251	3.37372	3.90948	5.35	6.7	7.55	9.95
3.25688	4.05617	4.79768	6.15	7.75	9	11.05
3.49495	4.23515	4.97524	6.15	7.85	9.35	11.3
3.41076	4.02686	4.92992	6	7.8	8.95	10.8
3.28456	3.94038	4.74205	5.85	7.5	8.85	11.35
4.01674	4.72544	5.67917	6.9	8.9	10.5	13.1
4.2581	4.85106	5.93012	7.25	9.6	11.3	13.85
4.03525	4.67295	5.39536	6.8	9.4	10.95	13.35
4.00497	4.80316	5.47653	6.85	9.25	10.35	12.2
3.55451	4.17315	4.86555	6.2	8.25	9.4	11.65
3.25879	3.7033	4.30858	5.6	7.65	8.85	11.05
3.15885	3.58881	4.16782	5.55	7.25	8.35	10.3
3.38716	3.76724	4.41309	5.8	7.25	8.45	11.25
3.56192	4.0907	4.84532	6.15	7.95	9.25	12.05
3.18278	3.81291	4.48936	5.8	7.65	8.75	10.6
2.78559	3.34245	3.73043	5	6.15	6.8	8.6
2.42928	3.06575	3.26948	4.45	5.45	5.8	7.35
2.47363	3.11106	3.39184	4.4	5.75	6.3	7.45
2.37193	2.86788	3.38059	4.2	5.45	6.4	8
2.17296	2.62628	3.2151	4.1	5.3	6.15	8
2.33649	2.80697	3.31762	4.25	5.6	6.4	7.85
2.27239	2.84465	3.36733	4.15	5.8	6.85	7.85
2.43969	3.0988	3.61957	4.55	6	6.95	7.9
2.73226	3.3599	3.78529	4.85	6	6.7	7.9
2.90086	3.57309	4.044	5.15	6.6	7.3	8.85
2.75599	3.33041	3.90442	5	6.6	7.65	9.4
2.39477	2.90365	3.52283	4.65	6.1	7.15	8.65
2.49058	3.089	3.61905	4.85	6.1	7.05	8.6
2.86368	3.53098	4.07141	5.45	6.75	7.9	9.9
3.22844	3.84337	4.52948	6.05	7.6	8.65	11
3.36662	3.93316	4.70256	6.2	8.2	9.1	11.6
3.03923	3.54404	4.31521	5.6	7.55	8.5	10.5
3.3173	3.64869	4.31018	5.55	7.3	8.3	9.6
3.92699	4.23022	4.87782	6.4	8.05	9.05	10.9
3.51019	3.80819	4.44984	5.95	7.45	8.2	10.5
2.73244	3.12298	3.78673	5.05	6.55	7.3	9
2.24825	2.73762	3.34063	4.45	5.85	6.7	8.35
2.58159	3.12286	3.67986	4.75	6.45	7.2	8.85
3.09747	3.62767	4.29721	5.3	7.1	8.05	9.55
3.37981	3.9278	4.40917	5.35	7	7.9	9.45
3.38212	4.10311	4.52407	5.55	7.2	8.15	10.3
3.18819	3.8082	4.34567	5.45	7	8.35	10.75
3.70618	4.18646	4.77984	6.1	7.9	9.4	11.25
3.63772	4.19185	4.94968	6.3	8.25	9.65	11.15
3.3535	4.03898	4.74987	5.75	7.45	8.9	10.8
3.42162	4.14383	4.76601	5.75	7.35	8.55	10.55
3.17077	3.84692	4.52597	5.55	7.35	8.7	10.8
3.42362	4.01769	4.83296	5.95	8.05	9.6	12.4
3.59914	4.16714	5.04793	6.25	8.5	9.8	12.35
3.27852	3.9769	4.79582	5.8	7.7	8.95	10.85
2.75242	3.33505	3.98757	4.85	6.25	7.45	9.15
2.52638	2.92458	3.38849	4.35	5.7	6.65	8.5
2.594	3.03631	3.44987	4.4	5.75	6.25	8.15
2.35613	2.80885	3.2707	4.2	5.35	5.95	7.6
2.26231	2.79189	3.31914	4.25	5.6	6.6	8.05
2.33832	2.98041	3.51444	4.55	6.05	7	8.4
2.59031	3.23377	3.86137	5.1	6.55	7.7	9.3
2.58703	3.09792	3.70992	4.75	6.25	7.5	9.2
2.37269	2.77615	3.16913	4.35	6.05	7.05	8.9
2.69177	3.1902	3.49194	4.9	6.6	7.35	8.85
2.78119	3.31614	3.58482	4.9	6.05	6.75	8.15
2.5719	2.95888	3.32058	4.45	5.55	6.35	7.6
2.48023	2.96532	3.36583	4.3	5.65	6.35	7.6
2.37095	3.05024	3.38715	4.25	5.55	6.35	8.75
2.89585	3.68659	4.2802	5.2	6.75	7.6	10.15
3.07033	3.81567	4.59298	5.5	7.25	8.1	10.3
2.67852	3.37207	4.07253	5	6.5	7.5	9.3
2.57001	3.34816	3.90014	4.85	6.35	7.75	9.25
2.4228	3.12085	3.5529	4.3	5.85	6.95	8.55
2.26308	2.74739	3.1737	4	5.25	5.95	7.75
2.11711	2.57369	2.93804	3.9	5.1	6.25	8
1.91445	2.46382	2.84046	3.75	5.05	6.05	7.45
1.74545	2.15741	2.63835	3.45	4.7	5.3	6.5
2.00801	2.37796	2.74881	3.65	4.85	5.35	6.35
2.4253	2.93156	3.32176	4.3	5.45	6.2	7.65
2.38486	2.8219	3.32476	4.3	5.5	6.3	8.15
2.16562	2.5009	3.04747	4.15	5.4	6	7.55
2.51436	2.66313	3.1353	4.35	5.7	6.6	8.45
2.99791	3.26469	3.75675	5.3	6.9	7.6	9.05
2.44203	2.88795	3.38696	4.9	6.3	6.8	8.1
2.66281	2.91759	3.31769	4.75	5.8	6.7	8.95
3.52101	3.85137	4.50308	6.2	7.6	8.35	10.4
3.28163	3.81162	4.50104	6.25	7.8	8.55	10.55
3.47435	4.19161	4.8653	6.45	7.95	9.1	11.25
4.03818	4.48898	5.32514	6.75	8.6	9.85	11.9
3.32994	3.57564	4.22997	5.7	7.55	8.8	10.85
3.10632	3.5341	4.08754	5.7	7.45	8.45	10.35
4.03785	4.55665	5.23999	7.05	8.65	9.6	11.95
4.29167	4.84255	5.55351	7.35	8.95	9.9	12.4
3.79022	4.23663	4.94379	6.6	8	9	11
2.83396	3.35098	3.84529	5.35	6.5	7.7	9.65
2.60409	2.95743	3.38489	4.65	5.8	6.65	8.55
2.81654	3.03452	3.43428	4.6	5.65	6.15	8.15
2.4696	2.76043	3.02762	4.2	5.25	6.05	8.15
2.90367	3.15357	3.26733	4.45	5.65	6.65	8.75
3.33124	3.69329	3.87563	5.35	6.75	7.85	9.75
3.19948	3.6485	4.12527	5.7	7	8.1	9.7
2.96045	3.4549	3.97982	5.2	6.5	7.4	9.45
3.02386	3.28695	3.88991	5	6.75	7.75	10.1
3.25464	3.6578	4.32824	5.6	7.45	8.55	10.6
2.87772	3.51808	3.94752	5.15	6.6	7.55	9.05
2.85028	3.36861	3.82775	4.9	6.15	7.35	9.4
3.1524	3.82652	4.29781	5.5	6.8	8.4	10.75
3.45297	4.13785	4.59937	5.8	7.45	8.8	10.95
3.66512	4.12492	4.93256	6.25	8.15	9.05	11.7
3.9778	4.25739	5.22245	6.95	8.85	9.8	12.55
4.01876	4.43035	5.18049	6.9	8.6	9.55	11.35
3.45524	4.12582	4.74239	6.1	7.9	8.85	10.05
3.08922	3.8039	4.30552	5.5	7.4	8.6	10.1
2.94212	3.6389	4.0776	5.25	6.95	7.95	9.8
2.81397	3.49195	4.09569	5.2	6.7	7.55	9.05
2.67365	3.24901	3.77591	4.8	6.15	6.95	8.15
2.69922	3.2549	3.82235	4.8	6.25	6.95	9
3.08857	3.67126	4.49185	5.55	7.3	8.45	11.1
3.42731	4.07096	5.16986	6.45	8.55	10.15	12.6
3.57714	4.4199	5.40067	6.7	8.85	10.35	12.65
3.78974	4.69116	5.57148	6.85	9.15	10.3	13.05
3.76418	4.63483	5.63173	6.9	9.15	10.2	12.8
3.23845	4.00019	4.86576	5.95	8	9.55	11.95
2.9275	3.56696	4.3167	5.2	7.25	8.85	10.9
3.33144	3.93492	4.67594	5.6	7.45	8.7	10.35
3.84253	4.52504	5.2767	6.4	8.35	9.7	11.5
3.33837	4.1393	4.76528	5.9	7.85	9.15	11.15
3.17051	3.98015	4.60441	5.75	7.85	9.15	11.6
4.12588	5.05346	5.92576	7.15	9.45	11.15	13.95
4.69614	5.64402	6.66854	8.05	10.3	11.8	14.15
4.37476	5.02632	6.00788	7.45	10	11.1	12.75
3.76651	4.36934	5.12366	6.4	8.7	10.25	12.05
3.95848	4.7087	5.39141	6.6	8.5	10.25	12.8
4.08694	4.69364	5.66496	6.8	9	10.5	13.25
3.74004	4.21394	5.27005	6.45	8.8	10.05	12.5
3.61648	4.22061	4.92678	6.15	8.1	9.05	11.6
3.69243	4.46273	5.12454	6.45	8.2	9.4	11.6
3.74662	4.51831	5.29645	6.6	8.5	9.8	11.65
3.5688	4.21632	5.04364	6.1	7.95	9	11.15
3.54989	4.31739	5.03738	6.2	7.7	8.8	10.65
3.26977	3.99366	4.6221	5.7	7.2	8.5	9.75
3.02472	3.69899	4.37717	5.25	7	8.05	9.55
3.20317	3.996	4.63787	5.65	7.5	8.55	10.35
3.41626	4.18565	4.77319	6	7.85	9	10.8
3.35567	4.141	4.48043	5.6	7.35	8.2	10
2.97277	3.5413	3.91555	4.9	6.5	7.3	8.6
2.58119	2.9994	3.42077	4.4	5.9	6.8	8.1
2.3804	2.87926	3.25052	4.05	5.35	6.55	8.2
2.41106	2.90294	3.49616	4.3	5.65	6.85	8.05
2.27296	2.72822	3.27476	4.3	5.75	7	7.9
2.75793	3.44906	3.80995	5.05	6.4	7.65	8.9
3.19841	3.7237	4.22153	5.6	7.15	8.15	9
2.75449	3.03645	3.71562	4.8	6.5	7.45	8.15
2.50242	2.93828	3.48269	4.5	5.95	6.75	7.8
2.79103	3.28317	3.5588	4.7	5.75	6.6	7.7
3.27233	3.74246	4.33149	5.4	6.4	7.35	9.15
3.4324	3.8754	4.66511	5.75	7.05	8.1	10.1
3.21408	3.66744	4.22087	5.5	7.05	8.15	9.4
2.97557	3.21184	3.55725	5	6.5	7.65	8.95
4.14925	4.26981	4.52612	6.2	8.2	9.75	11.95
5.00843	5.11964	5.5955	7.8	9.75	11.45	14.55
3.86094	4.14338	4.67412	6.65	8.2	10	13.2
3.66699	4.27606	4.8133	6.35	8.3	10.05	12.6
3.94341	4.5506	5.13935	6.7	8.8	10.05	11.95
3.38691	3.65673	4.3721	6	7.8	8.95	10.45
3.16247	3.29734	4.04445	5.6	7	8.1	9.75
2.91171	3.30194	3.87052	5.15	6.5	7.5	9.5
3.33814	3.82915	4.25006	5.7	7.25	8.1	10.6
3.8048	4.17194	4.66366	6.35	7.95	9.1	11.75
3.57702	4.11436	4.6956	6.45	8.05	9.4	11.5
3.51364	4.02472	4.67501	6.3	7.85	8.85	10.5
3.70594	4.2359	5.04069	6.35	8.25	9.45	11.4
3.94994	4.80789	5.49532	6.8	8.85	10.25	12.6
3.69564	4.584	5.19209	6.5	8.1	9.5	11.8
3.5813	4.43132	5.18899	6.45	8.5	10	12.05
3.75969	4.57411	5.50066	6.65	8.95	10.2	12.1
3.7044	4.33736	5.05992	6.2	8.45	9.55	11.35
3.23934	3.70295	4.12434	5.4	7.5	8.75	10.85
3.08362	3.70552	4.12391	5.35	7.05	8.1	10.7
3.57325	4.19559	4.65802	5.95	7.75	8.75	11.35
3.70962	4.25868	4.80983	6.4	8.2	9.45	11.9
3.63813	4.03427	4.78245	6.55	8.15	9.25	11.5
3.70544	3.85578	4.35082	6	7.5	8.5	10.35
3.52462	3.75505	4.06005	5.55	7	8.15	10.2
3.30652	3.72294	4.21126	5.75	7.45	8.7	10.9
3.17342	3.76007	4.30843	5.65	7.5	8.95	11
3.09956	3.86839	4.6676	5.85	7.7	9.3	11.5
3.15395	3.94357	4.82651	6.05	7.65	8.95	11.25
3.38536	4.13551	4.83043	6	7.45	8.55	11.25
3.37842	4.17217	4.81729	6	7.85	9	11.4
2.83244	3.569	4.24266	5.3	7.15	8.15	9.85
2.58885	3.36801	4.13231	5.1	6.9	7.95	9.5
2.47182	3.1694	3.79245	4.75	6.3	7.35	8.8
2.43857	2.99172	3.42423	4.4	5.65	6.7	8.5
2.75128	3.58601	4.10073	5.2	6.8	7.7	9.55
3.3606	4.23732	5.11274	6.2	8.15	8.95	10.9
3.47253	4.12116	5.15687	6.25	8.35	9.45	11.55
3.52818	4.31112	5.17656	6.35	8.75	10	12.15
3.76347	4.54725	5.41359	6.55	8.95	10.6	13
3.81405	4.66971	5.6181	6.75	8.95	10.8	12.75
3.80302	4.68289	5.69744	7	9.05	10.45	12.25
3.76835	4.66345	5.52567	6.9	8.65	9.85	11.8
3.66458	4.54295	5.29213	6.45	8.2	9.25	11.95
4.08097	4.78501	5.7298	6.75	9.05	10.5	13.4
4.60329	5.54251	6.63608	7.85	10.55	12.35	14.8
4.04094	5.0707	6.12157	7.4	9.9	11.5	14.6
3.80747	4.63799	5.66773	6.85	9.1	10.55	13.9
3.75264	4.38468	5.42673	6.55	8.85	10.4	13.15
3.55474	4.145	5.02819	6.3	8.3	9.65	12.1
3.43027	4.05442	4.61978	5.85	7.55	8.4	10.35
3.09989	3.68762	4.13059	5.15	6.95	7.9	9.6
3.27045	3.90144	4.56821	5.7	7.6	8.8	10.65
3.58006	4.30641	5.12422	6.35	8.35	9.55	11.6
3.84661	4.5813	5.41234	6.6	8.55	9.55	11.85
3.72518	4.54548	5.18481	6.4	8.25	9.3	12.05
3.08555	3.89892	4.43504	5.6	7.65	8.95	11.5
3.17173	3.93077	4.57777	5.6	7.9	9.25	11.25
3.30512	4.12099	4.80877	5.85	8.2	9.65	11.8
3.41742	4.27967	4.98809	6.1	8.5	9.85	11.75
3.33089	4.16188	4.90194	6.05	8.3	9.5	11.7
3.01618	3.73574	4.45231	5.5	7.4	8.65	10.9
3.09916	3.55307	4.21561	5.35	7	8.1	10.05
3.24673	3.67375	4.3361	5.5	7	8.1	10.25
3.03635	3.58838	4.05841	5	6.6	7.35	9.25
2.8195	3.33781	3.87778	4.8	6.75	7.6	9.7
3.29348	3.98736	4.66734	5.9	7.75	8.9	11.55
3.59275	4.38041	4.92321	6.45	8.2	9.25	11.8
3.72888	4.43048	5.11839	6.75	8.85	9.8	12.1
4.07323	4.67694	5.44118	7.2	9.7	10.5	12.4
4.12859	4.61508	5.43115	7.1	9.4	10.35	11.65
3.48179	4.00802	4.74398	6	7.8	9.1	10.3
3.18209	3.72329	4.20921	5.45	7.5	8.8	10.35
3.26685	3.66702	4.24704	5.7	7.7	8.7	10.95
3.73556	4.10427	4.81287	6.4	8.4	9.45	12.05
3.6418	4.26457	4.85753	6.55	8.35	9.55	11.8
3.13051	3.93592	4.50095	5.95	7.6	8.95	11.3
3.66922	4.49836	5.30102	6.5	8.65	10.1	13.2
4.01398	4.90672	5.84533	7.3	9.7	11.1	13.65
3.93135	4.71008	5.61913	7.15	9.3	10.7	12.85
4.20615	4.90262	5.82097	7.2	9.1	10.5	12.3
4.32341	4.96712	5.86557	7.3	9.25	10.8	12.7
4.07552	4.58941	5.42605	7	8.8	10.4	12.9
4.02319	4.49494	5.26184	6.95	8.95	10.4	12.55
3.73966	4.0284	4.92244	6.4	8.45	9.9	12.7
3.57155	4.03909	5.10939	6.5	8.25	9.3	11.8
3.77324	4.54976	5.44226	6.75	8.55	9.7	11.6
4.10977	4.91041	5.68192	6.9	8.9	10.5	12.85
4.14997	4.87325	5.49297	6.9	9.05	10.8	13.5
4.00283	4.53044	5.32697	6.75	8.9	10.35	13.25
3.96414	4.53609	5.52423	6.95	9.2	10.45	12.85
3.4717	4.20305	5.03104	6.4	8.7	10.15	11.8
3.15734	3.88752	4.69401	5.8	7.65	8.7	10.35
3.16455	3.88975	4.65048	5.75	7.35	8.5	10.1
3.53123	4.29803	5.12886	6.4	8.3	9.75	11.85
4.01271	4.70721	5.65457	6.95	9.45	10.9	13.4
3.50877	4.19558	5.02513	6.2	8.45	9.85	12.2
3.0316	3.57856	4.44737	5.5	7.5	9.15	11.25
2.92931	3.4899	4.40796	5.4	7.1	9	10.95
2.87866	3.58277	4.33561	5.3	6.6	8.25	10.35
2.75532	3.45761	4.10516	5.05	6.65	8.15	9.95
2.44576	3.15706	3.7541	4.65	6.15	7.45	8.9
2.70287	3.39145	4.17938	5.05	6.45	7.4	8.9
2.87603	3.5579	4.38023	5.3	6.9	7.75	9.5
3.06714	3.67992	4.38608	5.55	7.2	8.05	9.75
3.82551	4.31264	4.79401	6.1	7.7	8.55	10.1
4.23085	4.863	5.43718	6.75	8.75	10.05	11.65
3.92881	4.76943	5.62437	7.05	9.2	10.45	12.2
3.69708	4.27281	5.02824	6.4	8.15	9.15	10.8
3.56542	3.92541	4.66203	5.8	7.45	8.9	10.9
3.69088	4.25329	4.90938	5.95	7.7	9.25	11.75
4.16284	4.81488	5.34531	6.5	8.4	9.35	11.6
4.0359	4.75391	5.24205	6.75	8.6	9.15	11.75
3.7929	4.56569	5.19645	6.9	8.65	9.45	12.05
3.30674	3.9997	4.79571	6.3	7.85	9	11.7
3.08864	3.65768	4.47317	6	7.4	8.45	11.5
3.0811	3.48544	4.10617	5.65	7.3	8.2	10.5
3.73996	4.21713	4.7817	6.25	8.05	8.8	10.55
4.06086	4.52066	5.01254	6.35	7.9	8.75	10.95
3.53801	3.98258	4.48253	5.65	7.3	8.65	11.15
3.2637	3.81899	4.53532	5.65	7.4	8.75	10.45
2.58711	3.08278	3.55573	4.8	6.2	7.4	8.85
2.51928	2.98862	3.52511	4.8	6.2	7.45	9.2
3.11312	3.58694	4.29752	5.4	6.95	7.95	9.75
3.62186	4.10708	4.49787	5.65	7.4	8.45	10.5
3.70905	4.27145	4.68029	5.9	7.85	9.15	11.35
3.61127	4.07332	4.69054	6.15	7.8	9.05	10.95
4.35258	4.58403	5.37057	7.3	8.9	10.15	11.95
4.84412	5.20043	6.16526	8.05	10.05	11.05	13.25
4.65541	5.15227	5.71617	7.35	9.5	10.35	12.65
4.50979	4.9401	5.48414	7.2	9.4	10.4	12.1
4.07769	4.33437	5.28535	6.95	9.15	10.25	11.7
3.70465	3.89429	4.52016	6	7.8	8.9	11.2
3.85417	4.18264	4.76157	6.25	7.85	8.95	11.55
3.60103	4.23736	4.93236	6.6	8.35	9.6	11.75
3.34821	4.13399	4.80973	6.6	8.3	9.3	11.45
3.92588	4.50381	5.23937	6.9	8.55	9.45	11.45
3.71922	4.16025	4.65545	6.05	7.45	8.6	10.4
2.96015	3.54684	3.81672	5.05	6.45	7.35	9.6
2.86329	3.52313	3.87756	5.3	6.85	7.7	9.5
2.53686	2.981	3.49857	5.1	6.3	7.1	8.3
2.27445	2.55366	2.99433	4.4	5.4	6	7.7
2.71625	3.17033	3.77348	4.95	6.2	7.25	9.2
3.10023	3.80273	4.7026	6.05	7.5	8.25	9.9
2.86782	3.53487	4.2149	5.85	7.35	8.1	10.05
2.94143	3.58078	4.08302	5.55	7.25	8.35	10.4
2.92995	3.46095	4.13813	5.25	7	7.85	9.4
2.43974	2.93831	3.57736	4.6	6.2	7.35	8.95
2.64505	3.23581	3.88062	5	6.7	8.05	9.95
2.94254	3.48689	4.261	5.35	7.3	8.55	10.7
2.84845	3.32869	3.96691	5	6.8	8.05	10.1
3.57173	4.21506	4.90618	6.05	7.95	9	11.4
4.10215	4.87941	5.92062	7.1	9.2	10.15	12.75
3.65747	4.39262	5.41689	6.6	8.6	9.8	11.75
3.35595	4.02877	4.92248	6.05	8.1	9.35	10.95
2.98833	3.71624	4.5251	5.5	7.3	8.5	10.4
3.38422	4.26591	5.1788	6.35	8.35	9.55	12.1
4.02345	4.93126	5.90199	7.25	9.55	11	13.4
3.87652	4.79902	5.44652	6.65	8.8	10.25	12.15
3.59421	4.38957	4.99492	6.1	8.15	9.35	11.3
3.7269	4.5388	5.2814	6.35	8.5	9.55	12.05
3.60414	4.4668	5.32808	6.35	8.7	9.6	12.15
2.89119	3.56219	4.39878	5.4	7.55	8.75	10.75
2.73026	3.326	4.08183	5.15	6.85	8.2	10.1
3.0276	3.64889	4.3216	5.3	6.7	7.6	9.35
2.76645	3.38411	3.99482	4.9	6.35	7.3	9
2.6925	3.3175	4.0266	5	6.85	8.35	9.7
2.75236	3.3639	3.99798	4.95	6.55	8.05	9.55
2.79456	3.4161	3.96018	4.9	6.15	7.45	9.2
2.76043	3.45704	3.9925	4.9	6.35	7.4	8.9
2.7813	3.44013	4.05354	5.1	6.7	7.8	9.7
3.16786	3.88256	4.48477	5.55	7.3	8.75	10.75
3.04467	3.77862	4.17836	5.15	6.65	7.85	9.65
2.94022	3.59314	4.13174	5.25	6.8	7.8	9.7
3.06074	3.64839	4.30849	5.45	7.4	8.45	10.2
2.99333	3.42441	4.03958	5.25	6.9	7.7	9.6
3.0918	3.4025	4.06285	5.5	6.9	7.7	9.8
3.29569	3.68033	4.22352	5.6	7	8	10.25
3.56186	4.03554	4.59763	6.25	7.6	8.9	10.85
3.3983	3.83581	4.48814	6.15	7.45	8.5	10.1
2.98549	3.38004	3.97385	5.1	6.4	7.4	9.4
3.1919	3.51887	3.95167	5.15	6.35	7.4	9.5
3.26579	3.60493	3.85142	5.25	6.2	6.8	8.8
3.00647	3.48755	3.90422	5.25	6.5	7.1	9.2
2.85997	3.36385	3.95089	5.25	6.8	7.7	9.65
2.71992	3.12938	3.71934	4.95	6.45	7.55	9.5
2.63462	3.00095	3.60513	4.75	6.15	6.8	8.65
2.80425	3.22446	3.72632	4.95	6.6	7.1	8.4
2.99582	3.45813	3.87642	5.2	6.7	7.55	9.05
2.98144	3.42268	3.94982	5.4	6.6	7.55	9.1
2.63701	2.87392	3.37966	4.7	5.85	6.75	7.85
2.43174	2.67757	3.11537	4	5.1	5.9	7.2
2.94225	3.30702	3.83379	4.7	5.95	6.6	8
3.06367	3.28357	3.76302	4.9	6.2	7.05	8.6
2.66364	2.93847	3.51735	4.75	6.2	7	8.5
2.79908	3.27177	3.89106	4.85	6.55	7.4	8.9
2.65314	3.20829	3.85858	4.65	6.15	7	8.7
2.24888	2.82331	3.42494	4.4	5.65	6.35	8.15
2.62737	3.15816	3.54491	4.75	6.2	7.2	9.45
2.95985	3.38798	3.76861	5.05	6.45	7.25	8.85
2.80785	3.0501	3.38158	4.45	5.75	6.45	7.65
3.06675	3.45058	3.77524	5.15	6.7	7.6	9.2
3.3223	3.94336	4.47644	5.9	7.7	8.4	9.65
3.13562	3.71209	4.39468	5.4	7.05	8.2	9.9
3.43814	4.01339	4.6896	5.9	7.85	9.25	11.75
3.77955	4.48529	5.20135	6.5	8.95	10.45	12.95
3.75639	4.55683	5.26547	6.5	8.8	10.85	13.25
4.23063	5.01115	5.88768	7.25	9.4	10.85	12.9
4.79618	5.49949	6.53297	7.95	10.2	11.3	13.15
4.35411	4.98544	5.79106	7.2	9.3	10.45	12.95
3.93266	4.41619	5.14315	6.55	8.35	9.25	12
3.92017	4.35375	5.13046	6.5	8.45	9.6	12.05
3.66672	4.38417	5.05279	6.3	8.65	10.25	12.85
4.13464	5.02467	5.69474	6.9	9.25	10.75	13.3
3.92855	4.71534	5.41738	6.6	8.6	9.55	11.95
3.04099	3.67933	4.245	5.2	7.05	8.15	10.25
3.08816	3.76922	4.36326	5.3	7.4	8.75	11
3.41117	4.16804	4.93789	6	8.2	9.5	12
3.18099	3.85219	4.66901	5.7	7.65	9.05	11
2.912	3.50811	4.12177	5.2	6.95	8.1	9.65
2.60382	3.11238	3.54885	4.55	6.15	7	8.65
2.17302	2.55852	3.03758	3.85	5.3	5.95	7.65
2.10906	2.59583	3.09816	3.9	5.55	6.55	8.65
2.5987	3.26636	3.97421	4.85	6.95	8.1	10.35
3.00525	3.69175	4.54654	5.45	7.55	8.5	10.55
3.18788	3.83106	4.55245	5.6	7.7	8.9	11.25
3.25674	3.88913	4.62219	5.75	8.1	9.25	10.9
2.68207	3.1836	3.79306	4.75	6.55	7.65	8.55
2.4378	2.97795	3.47762	4.4	5.7	7	8.1
2.41051	2.98833	3.54783	4.65	5.95	7.05	8.9
2.73552	3.16822	3.72086	5.05	6.55	7.3	9.5
2.89924	3.31859	3.88593	5.1	6.8	7.75	9.6
2.81472	3.25431	3.84126	4.7	6.55	7.8	9.6
3.02301	3.54863	3.98479	4.95	7.05	8.2	10.05
3.3234	3.9112	4.41418	5.55	7.6	8.55	10.9
4.12019	4.56402	5.21923	6.35	8.35	9.25	11.55
4.08236	4.52544	5.08148	6.45	8.35	9.35	10.95
3.39096	3.98579	4.62754	6.25	8	9	10.95
3.62191	4.16426	4.75319	6.55	8.05	8.95	10.9
3.84388	4.37796	4.87357	6.7	8.3	9	11.05
4.04498	4.60889	5.26326	6.9	8.7	9.75	12.7
4.34126	4.68245	5.38103	6.85	8.7	10	12.6
4.37887	4.67808	5.27404	6.75	8.9	9.9	11.95
4.39033	4.84984	5.46932	6.95	9.1	9.75	11.55
3.80345	4.39352	5.11907	6.45	8.35	9	10.7
3.35662	4.03453	4.68666	5.95	7.75	8.7	10.8
3.57749	4.3142	4.89462	6.35	8.2	9.1	11.2
3.71326	4.35279	5.10388	6.7	8.7	9.65	11.7
4.04684	4.42982	5.3304	6.8	8.8	9.95	12.25
4.26339	4.64044	5.37271	6.65	8.55	9.8	12.15
3.83524	4.49228	5.02607	6.1	7.8	9	10.95
3.28363	3.93234	4.41216	5.45	6.9	8	9.65
3.16491	3.64431	4.16435	5.25	6.9	7.9	10.25
3.27303	3.96151	4.58516	5.7	7.55	8.35	10.85
3.06879	3.74299	4.25986	5.45	7.15	7.95	9.95
3.16189	3.53884	4.05117	5.2	6.7	7.75	9.75
3.4111	3.73874	4.27954	5.4	7.2	8.25	10.35
3.50749	3.79819	4.50189	5.85	7.65	8.8	11
3.33328	3.63876	4.39699	5.85	7.5	8.75	10.85
3.0421	3.48498	4.13463	5.45	7.2	8.05	9.85
3.06295	3.51382	4.13502	5.25	7	7.8	9.6
3.32807	3.80521	4.29322	5.3	7.25	8.5	10.2
3.23512	3.76414	4.37697	5.5	7.05	8.15	9.5
2.8085	3.29161	3.92686	5.15	6.45	7.3	9.2
2.61844	3.09996	3.65123	4.8	6.35	7.5	9.75
2.55627	3.09783	3.66154	4.7	6.4	7.4	9.15
3.00974	3.45484	4.03897	5.35	7.15	8.1	10.2
3.74239	4.0073	4.63022	6.35	8.3	9.6	12.25
4.18859	4.61097	5.31112	6.95	8.95	10.15	11.9
3.74235	4.43173	5.27075	6.55	8.5	9.85	11.1
3.13363	3.60284	4.49481	5.55	7.15	8.4	9.85
2.5856	2.90494	3.53264	4.45	5.65	6.6	8.25
2.68219	3.40693	3.73509	4.7	6.15	7.45	9.75
3.59551	4.48447	5.13832	6.15	8.15	9.9	12.55
3.8056	4.48114	5.36906	6.4	8.65	10.35	13.15
3.97451	4.65369	5.60218	6.7	9.05	10.35	12.85
3.66277	4.45689	5.30775	6.35	8.35	9.35	11.5
3.4457	4.19203	4.71092	5.8	7.45	8.4	10.7
4.12461	4.71809	5.15974	6.55	8.55	9.65	12.1
3.98412	4.51921	5.10985	6.65	8.5	9.7	11.95
3.65189	3.98118	4.58479	6.25	7.65	8.95	11
3.81882	4.13247	4.70047	6.45	8.1	9.7	12.55
4.21623	4.73408	5.67859	7.75	9.9	11.45	14.6
4.49869	5.1735	6.19955	8.4	10.6	12.15	14.4
4.07371	4.81346	5.37421	7.15	9	10.35	12.45
3.80205	4.1321	4.52925	6.25	7.9	9.1	11.05
3.44978	3.64336	4.14055	5.85	7.35	8.4	10
2.9902	3.30308	3.68136	5.1	6.45	7.3	8.8
2.96953	3.35792	3.88131	5.05	6.7	7.95	9.45
3.47142	3.92137	4.59816	5.85	7.6	8.7	10.5
3.79381	4.11098	4.66513	6.1	7.7	8.55	10.45
3.43411	3.88389	4.43364	5.75	7.45	8.5	10.2
3.30443	3.86572	4.08077	5.25	6.7	7.5	9.05
2.83852	3.17801	3.24577	4.25	5.5	6.1	7.95
2.4389	2.67884	3.06525	4	5.45	6.25	7.9
2.57813	2.90797	3.47094	4.6	6.05	7	8.6
2.24611	2.51095	3.14794	4.3	5.6	6.75	8.75
2.424	2.76758	3.25388	4.55	6.05	7.5	9.5
3.18308	3.70116	4.29137	5.65	7.4	8.95	10.9
3.05043	3.50463	4.18351	5.35	7.1	8.55	10.6
3.21052	3.61749	4.10084	5.45	7	8.4	10.95
3.98735	4.19072	4.8281	6.45	8	9.05	11.55
4.03395	4.26831	4.99938	6.6	8.3	9.5	12
3.95077	4.38534	5.03641	6.65	8.35	9.6	12.45
4.24885	4.7061	5.53413	7.4	9.1	10.05	12.8
4.6864	5.22782	5.93174	7.9	9.75	10.75	13.65
4.76811	5.23019	5.84052	7.6	9.6	10.8	13.95
4.42902	4.8781	5.65213	7.25	9	10.4	12.95
3.98206	4.44407	5.26721	6.8	8.4	9.6	11.4
3.65509	4.16326	4.97207	6.3	8	9	11
3.71296	4.05374	4.69889	5.95	7.35	8.1	10.15
3.31988	3.63459	4.26544	5.45	6.9	7.7	9.4
3.01355	3.42721	4.18689	5.25	7.15	8.3	9.85
3.42822	3.82904	4.62032	5.7	7.6	8.75	10.35
3.53225	3.99021	4.75972	5.85	7.6	8.45	9.65
2.79602	3.10693	3.6577	4.55	6	6.8	7.65
2.03593	2.38875	2.75386	3.4	4.65	5.75	7.25
2.52677	3.09884	3.64339	4.45	6	7	8.15
3.02814	3.63753	4.15005	5.1	6.55	7.4	8.7
3.30719	3.66371	4.22881	5.4	6.6	7.55	9.7
3.59666	3.99593	4.67026	6	7.55	8.3	10.1
3.39157	3.70279	4.34007	5.8	7.45	8.1	10.1
3.41716	3.5672	4.032	5.65	7.15	7.9	9.85
3.75941	4.05073	4.59935	6.05	7.6	8.65	10.65
3.83036	4.27552	5.13845	6.5	8.45	9.9	12.2
4.09733	4.56447	5.44052	7.05	8.8	10.15	12.35
4.42348	4.73185	5.57282	7.3	8.9	9.8	12.65
3.74075	4.23856	4.99276	6.5	8.5	9.7	12.2
3.53713	4.11592	4.91673	6.4	8.55	9.7	11.6
3.40193	4.01587	4.86148	6.2	8.2	9.15	10.75
3.09904	3.77624	4.60553	5.7	7.25	8.4	9.6
3.44636	3.86086	4.39466	5.75	7.2	8	9.55
3.59707	3.83139	3.96342	5.65	7.35	8.4	10.4
3.61297	3.87608	3.98457	5.5	6.95	8.15	10.15
4.00181	4.03005	4.18433	5.95	7.15	8.05	9.4
3.7472	3.81238	4.09547	6.1	7.4	8.2	9.7
3.27476	3.71782	4.01987	5.8	7.25	8	10
3.24706	3.57205	3.92874	5.7	7.45	8.45	10.55
2.95447	3.15052	3.63948	5.1	6.6	7.7	9.8
2.7066	3.04731	3.31643	4.55	5.75	6.55	8.45
2.36672	2.65574	2.88822	4.15	5.55	6.25	8.5
2.79069	3.02247	3.33387	4.8	6.1	6.95	9.5
2.7644	3.16389	3.45313	5.05	6.2	7.15	9.25
2.39738	2.89891	3.29147	4.6	5.85	6.75	8.65
2.97163	3.51139	4.19436	5.3	6.75	7.55	8.65
3.26202	3.74096	4.48437	5.75	7.25	8.15	9.25
3.62976	4.12123	5.00876	6.5	7.75	8.75	11.05
3.87251	4.2715	5.19114	6.85	8.1	8.95	11.25
4.12329	4.10722	4.6855	6.4	7.9	8.85	10.65
4.47917	4.32056	4.85257	6.6	8.2	9.5	11.7
4.63647	4.80827	5.15694	7.05	8.7	10	12.4
4.6627	4.97981	5.36656	7.45	9.3	10.35	12.5
4.63353	4.70181	5.13854	6.95	8.75	9.6	11.95
4.68246	4.68169	5.04388	6.95	8.7	9.85	12.6
4.97456	4.79012	5.46505	7.65	9.5	10.8	14
4.93881	4.90841	5.57902	7.55	9.25	10.1	12.95
4.31613	4.51447	5.25294	7.2	8.8	9.75	12.05
4.48488	4.70238	5.44986	7.35	9	10.4	12.3
4.52448	4.66514	5.05812	6.95	8.5	9.85	12.45
4.12222	4.25074	4.74287	6.45	8.15	9.25	12.5
4.2643	4.45596	5.28425	7.25	9.2	10.5	13.3
4.19553	4.14967	4.85636	6.95	8.75	10.2	12.5
4.25326	4.08792	4.61329	6.6	8.15	9.55	11.7
4.68028	4.41182	4.78316	7	8.35	9.7	11.8
4.55156	4.43542	4.76576	6.65	8.2	9.35	11.45
5.49359	5.37745	5.21985	7.2	8.7	10.05	13.25
4.57432	4.61672	4.79495	6.6	8.55	9.95	12.45
3.96035	4.33762	4.76701	6.45	8.35	9.15	11
3.94302	4.23308	4.9241	6.75	8.45	9.55	11.05
3.90122	3.83248	4.36962	6.25	7.95	9.15	10.9
3.39911	3.50979	3.96989	5.85	7.1	7.85	10.05
3.07602	3.36607	3.99688	5.85	7.15	8.4	10.85
3.61766	3.55921	4.27014	6	7.3	8.35	11.15
2.84849	3.0103	3.66596	5.15	6.25	7.75	10.85
2.19488	2.74355	3.54688	4.9	6.65	8.65	11.2
2.41637	2.98356	4.23269	5.75	7.65	8.85	10.75
2.16625	2.68216	3.70938	5.35	6.85	8.05	9.9
2.06769	2.70484	3.61506	5.55	6.75	8.1	9.8
2.37459	3.08656	4.13476	5.8	6.95	8.15	9.9
3.00908	3.75739	4.76595	6.1	7.75	8.95	10.65
2.99754	3.90318	4.92389	6.25	7.85	8.9	10.35
2.15281	2.95272	3.69022	4.65	6.05	6.85	8.4
2.10885	2.60187	3.12326	3.95	5.65	6.9	8.5
2.6645	3.0436	3.66076	4.75	6.55	8.1	9.9
3.37123	3.67834	4.19411	5.2	6.8	8	10
3.84443	4.205	4.66321	5.5	7.4	8.55	10.75
3.48727	3.82993	4.68955	5.75	7.85	9.45	11.85
3.06884	3.52632	4.67674	5.9	7.6	8.7	10.75
[truncated: 8,116 more rows]

## Sheet: sodalakerough
0.712116	1.31154	1.57519	1.75	2.65	2.85	3.55
1.33512	1.98201	1.8123	2	2.85	3.2	3.6
1.17213	2.24371	1.98178	2.2	2.95	3.45	4
0.795034	1.85036	1.65722	1.9	2.85	3.65	4.45
0.596237	1.55724	1.60054	1.85	3.15	4.25	5.55
0.496806	1.7136	2.31898	2.65	4.2	5.4	7.7
1.0375	2.06086	3.09284	3.75	5.45	6.8	9.15
1.02056	1.87317	3.02197	3.85	5.55	6.8	8.2
0.721639	1.51512	2.42291	3.15	4.5	5.4	6.35
1.04694	1.5739	2.18969	2.85	3.95	4.65	5.45
0.928939	1.47142	1.94327	2.55	3.6	4.3	4.95
0.780285	1.26764	1.6311	2.15	3.15	3.9	4.55
0.760412	1.12468	1.47102	2	2.95	3.6	4.3
0.71615	1.07698	1.41627	1.9	2.65	3.15	4
0.779731	1.15871	1.56414	2	2.65	3.25	4.1
0.90877	1.45749	1.97926	2.5	3.55	4.35	4.7
0.962642	1.64746	2.28926	2.85	4.05	4.75	4.9
0.883301	1.49162	2.10159	2.55	3.5	4.15	4.5
0.902163	1.42556	2.01166	2.4	3.5	4.15	4.35
1.2369	1.67693	2.44663	2.65	3.75	4.2	4.35
1.12243	1.52049	2.15573	2.35	3.1	3.35	4
0.605701	0.92417	1.24664	1.65	2.2	2.4	3.3
0.368887	0.608612	0.902491	1.2	1.75	1.95	2.75
0.232682	0.548228	0.845655	1.1	1.6	1.95	2.55
0.24793	0.633626	0.938476	1.2	1.65	2.05	2.2
0.30119	0.69804	1.00369	1.25	1.75	1.9	1.9
0.479387	0.879031	1.20539	1.55	2.15	2.2	2.6
0.582666	1.00621	1.48259	1.9	2.75	2.95	3.7
0.511977	1.31417	2.11148	2.65	3.7	4.25	5.4
0.46677	1.59515	2.35211	2.9	3.95	4.9	6.15
0.51976	1.85026	2.16666	2.5	3.45	4.55	5.9
0.568836	1.98025	2.3651	2.85	4.15	5.15	7.15
0.64339	1.84584	2.4791	3.2	4.9	6	8.05
0.623848	1.81481	2.71013	3.4	5.25	6.4	8.15
0.604397	1.99546	3.53693	4.4	6.25	7.25	8.55
0.904172	2.19857	3.70394	4.65	6.15	6.95	7.9
1.31271	2.2216	3.15586	3.95	5.4	6.15	7
1.53074	2.25104	2.98997	3.7	5.05	6.05	6.7
1.40663	2.06848	2.79017	3.45	4.6	5.75	6.3
1.27511	1.88669	2.61078	3.2	4.3	5.4	5.9
1.17379	1.74498	2.3463	2.95	4.1	5.45	6.05
1.17757	1.77283	2.38332	3.1	4.5	5.65	6
1.23315	1.77271	2.38865	3.05	4.15	4.85	5
0.959373	1.41484	1.84209	2.35	3	3.7	4.1
0.66293	1.04829	1.3608	1.8	2.4	3.05	3.4
0.511457	0.801396	1.05183	1.4	2.1	2.75	2.9
0.346085	0.606772	0.818785	1.1	1.85	2.3	2.35
0.224505	0.469538	0.710797	1	1.55	1.75	1.95
0.195549	0.420904	0.611764	0.85	1.25	1.25	1.55
0.262622	0.347406	0.319161	0.35	1.25	1.55	1.75
0.604772	0.800173	0.783768	0.85	1.4	1.5	1.6
0.566454	0.805054	0.777612	0.9	1.15	1.2	1.4
0.580834	0.874274	0.813563	0.9	1.4	1.7	2.1
0.789702	1.01147	1.00407	1.1	1.35	1.35	1.25
0.386195	0.572293	0.515374	0.6	1.3	1.85	2
0.144096	0.202262	0.274662	0.35	1.05	1.2	1.5
0.36525	0.547892	0.739495	0.9	1.8	2.05	2.35
0.401857	0.638627	0.849207	1.05	1.7	1.95	2.3
0.273535	0.497512	0.692074	0.95	1.45	1.6	1.85
0.191776	0.417106	0.59855	0.85	1.25	1.3	1.45
0.181844	0.354466	0.467979	0.65	1.05	1	1.3
0.199857	0.327243	0.427543	0.6	0.95	0.95	1.4
0.147441	0.241819	0.325186	0.45	1	1.2	1.65
0.103096	0.21211	0.315922	0.45	1.15	1.3	1.65
0.101963	0.207034	0.313594	0.45	1.05	1	1.25
0.0855978	0.227981	0.399301	0.5	0.85	1.05	1.9
0.34637	0.874208	1.308	1.75	2.35	2.65	4.2
0.681105	1.48503	2.12048	2.8	3.55	3.9	5.35
0.642971	1.44947	2.3	2.9	3.85	4.5	5.4
0.388179	1.20283	1.99627	2.45	3.5	4.6	6.1
0.586754	1.65201	2.67626	3.3	4.85	5.75	6.95
0.967407	1.98391	3.18213	4.1	5.4	5.75	5.8
0.744126	1.49316	2.32401	3.1	3.7	3.95	3.7
0.426024	0.970275	1.47508	1.85	2.3	2.55	2.7
0.387212	0.798164	1.35638	1.65	2.2	2.4	2.8
0.260929	0.713957	1.34815	1.7	2.35	2.4	3.05
0.241143	0.71582	1.11902	1.45	2	2.1	2.95
0.420656	0.797365	0.970521	1.2	1.75	1.9	2.3
0.358598	0.547303	0.605822	0.7	1.2	1.25	1.5
0.0837236	0.155211	0.234736	0.3	1	1.2	1.5
0.148239	0.297876	0.386817	0.5	1.15	1.3	1.35
0.103822	0.243002	0.313182	0.4	0.95	1.05	1.45
0.0681347	0.176646	0.284097	0.35	0.9	1.15	1.75
0.132633	0.290119	0.447623	0.55	1.1	1.35	1.7
0.334765	0.601149	0.685945	0.75	1.15	1.25	1.4
0.0724086	0.184797	0.284892	0.35	1.15	1.45	2
0.131084	0.351912	0.558419	0.7	1.25	1.7	2
0.175425	0.378594	0.548863	0.75	1.2	1.55	1.75
0.170091	0.342954	0.44573	0.6	1	1.15	1.4
0.0831888	0.183165	0.244146	0.3	0.65	0.85	1.15
0.0425816	0.0746895	0.108619	0.15	0.8	0.75	0.9
0.123046	0.2446	0.376568	0.5	1	1	1.25
0.158297	0.35287	0.496948	0.65	1.15	1.2	1.65
0.197869	0.409655	0.511602	0.65	1.1	1.2	1.7
0.0945394	0.294976	0.423299	0.55	1.2	1.6	2.45
0.173716	0.487228	0.678458	0.85	1.3	1.65	2.75
0.185441	0.502087	0.675183	0.8	1.3	1.7	2.7
0.281977	0.648468	0.688026	0.8	1.35	1.7	2.35
0.0894233	0.215478	0.217168	0.25	1.1	1.5	2.3
0.0933039	0.197562	0.298931	0.4	1.25	1.5	2.4
0.276498	0.66955	1.04774	1.3	1.9	2	2.6
0.316124	0.803097	1.30344	1.55	1.9	1.9	2.5
0.176013	0.460148	0.758072	0.9	1.25	1.3	1.85
0.0921114	0.274699	0.43857	0.55	1.1	1.2	1.7
0.119012	0.319023	0.565512	0.75	1.4	1.5	2.1
0.174937	0.470979	0.776447	1.05	1.55	1.6	2.3
0.174051	0.51454	0.800419	1.1	1.65	1.75	2.3
0.177673	0.544858	0.915573	1.25	1.95	2	2.3
0.202661	0.566841	1.01806	1.3	2.05	1.95	2.35
0.206991	0.546777	0.916077	1.1	1.8	1.9	2.4
0.453564	0.808324	1.12971	1.4	2.2	2.5	2.95
0.643288	0.984523	1.35026	1.75	2.55	2.8	3
0.576829	0.915433	1.22683	1.7	2.2	2.35	2.25
0.88413	0.996533	1.25592	1.55	2	2	2.3
0.806762	1.02369	1.23828	1.65	1.8	2	2.2
0.718565	0.965201	1.15417	1.3	1.8	2.5	2.6
0.978664	1.37306	1.62202	1.65	2.5	3.1	2.95
0.8665	1.5624	1.7871	1.85	2.6	3	2.85
0.492489	1.12028	1.42311	1.65	2.25	2.6	2.55
0.364332	0.678723	0.970872	1.3	1.9	2.3	2.25
0.491773	0.790669	1.06598	1.4	2.2	2.55	2.5
0.512298	0.849969	1.17596	1.5	2.3	2.5	2.5
0.57133	0.889173	1.18601	1.5	2.3	2.4	2.5
0.543539	0.64391	0.705978	0.85	1.1	1	0.95
0.489855	0.590806	0.646909	0.75	1.1	1.25	1.25
0.633972	0.881793	0.862419	0.95	1.4	1.75	1.7
0.332874	0.720148	0.864352	1	1.35	1.8	1.65
0.23948	0.73692	0.890911	1.05	1.65	2.05	2.25
0.285544	0.910438	1.0066	1.25	2.3	2.9	3.7
0.371866	1.10386	1.35273	1.8	3	3.55	4.75
0.434156	1.04147	1.37896	1.95	2.75	3	4.3
0.453019	1.09819	1.25135	1.75	2.5	2.9	3.65
0.600502	1.37522	1.47122	1.75	2.8	3.2	3.65
0.673905	1.47698	1.76035	2	3	3.25	4.05
0.713511	1.21118	1.54913	1.85	2.45	2.55	3.1
0.920895	1.21438	1.45171	1.7	2	2.1	2.65
0.857384	1.24102	1.50879	1.75	2	2.2	2.8
0.618008	0.860257	1.02244	1.15	1.15	1.3	2.05
0.340465	0.649737	0.999454	1.25	1.4	1.8	2
0.257453	0.738292	1.23609	1.5	1.95	2.4	2.4
0.263786	0.803824	1.32764	1.55	2.4	2.9	3.3
0.314173	0.844737	1.50192	1.9	2.85	3.05	3.75
0.310386	0.798106	1.48647	1.95	2.85	3	3.55
0.397045	0.738404	1.10763	1.4	2	2.2	2.45
0.411421	0.595591	0.769059	0.85	1.1	1.15	1.45
0.547694	0.781271	0.711046	0.75	1.45	1.5	1.95
0.624998	0.942678	0.893511	0.95	1.75	1.9	1.95
0.396256	0.659317	0.735762	0.85	1.35	1.7	1.85
0.561316	0.818796	1.09028	1.35	1.95	2.4	2.8
0.773043	1.18438	1.77683	2.3	3.3	3.65	4.2
0.591159	1.18322	2.04381	2.7	3.75	4.05	4.65
0.455994	1.09065	1.77965	2.3	3.05	3.35	3.7
0.344128	0.832175	1.2866	1.65	2.35	2.65	2.8
0.233007	0.61242	1.09157	1.45	2.25	2.45	2.6
0.334533	0.709952	1.14116	1.5	2.1	2.2	2.55
0.379422	0.698537	1.02051	1.35	1.8	2	2.35
0.295071	0.629859	1.02151	1.4	2	2.25	2.6
0.330341	0.857208	1.38945	1.85	2.55	2.95	3.35
0.419109	0.903211	1.29585	1.7	2.3	2.85	2.85
0.436712	0.710829	0.920959	1.25	1.7	2.05	2.05
0.404263	0.686913	1.02763	1.35	1.9	2.15	2.6
0.282476	0.607578	0.96691	1.25	1.8	1.95	2.45
0.217132	0.508225	0.686931	0.95	1.3	1.3	1.6
0.278298	0.541242	0.705046	0.85	1.15	1.1	1.4
0.250542	0.484191	0.645358	0.75	1	1.05	1.65
0.120967	0.184739	0.239395	0.3	0.85	1.5	2.4
0.288986	0.509566	0.693916	0.9	1.7	2.25	2.75
0.332053	0.684682	1.00932	1.35	2.1	2.65	2.9
0.301652	0.761528	1.32752	1.75	2.5	2.95	3.25
0.270436	0.810077	1.46272	1.95	2.6	2.85	3.25
0.286301	0.781179	1.32196	1.85	2.45	2.55	2.9
0.378103	0.83592	1.24816	1.7	2.4	2.6	2.75
0.368101	0.795242	1.15102	1.55	2.3	2.5	2.5
0.250286	0.576848	0.897649	1.25	1.9	1.95	2.2
0.261394	0.496095	0.683994	0.9	1.45	1.55	2.1
0.325057	0.553818	0.75685	0.95	1.6	1.7	2.1
0.332385	0.5562	0.789039	1.05	1.55	1.7	2.1
0.189502	0.247637	0.31853	0.35	0.95	1.25	1.75
0.437331	0.602032	0.769354	0.95	1.6	2.35	3.1
0.644136	0.945428	1.30319	1.7	2.6	3.5	4.25
1.08974	1.52822	2.04767	2.6	3.6	4.65	5.15
1.21855	1.74571	2.23262	2.9	3.85	4.65	5.1
1.03607	1.53176	2.02011	2.65	3.35	3.95	4.65
0.941609	1.38251	1.85375	2.4	3.05	3.65	4.25
0.606868	1.08245	1.52553	2.05	2.9	3.5	3.7
0.448749	0.962679	1.44815	1.95	2.9	3.25	3.25
0.426048	1.02145	1.47968	1.9	2.8	2.95	3.4
0.296744	0.926831	1.28315	1.6	2.3	2.45	3.45
0.324462	0.808648	0.931813	1.15	1.8	2	2.65
0.322015	0.691456	0.64874	0.75	1.5	1.75	1.95
0.192332	0.500959	0.546045	0.65	1.55	1.8	2.1
0.181996	0.533158	0.841152	1.1	2.1	2.2	2.9
0.45516	0.882031	1.37946	1.8	2.55	2.5	2.85
0.553083	1.08457	1.73903	2.25	2.9	3	3.2
0.562589	1.19021	1.92918	2.6	3.5	3.7	3.9
0.613641	1.16356	1.80748	2.45	3.2	3.3	3
0.436379	0.90942	1.29503	1.65	2	2.05	1.85
0.200062	0.482354	0.608856	0.75	1	1.15	1.25
0.0956097	0.142245	0.186148	0.25	1	1.05	1.65
0.38464	0.531732	0.712163	0.85	1.45	1.45	1.7
0.472905	0.667915	0.845387	1	1.3	1.2	1.15
0.140901	0.202949	0.264581	0.35	0.9	1.1	1.75
0.310984	0.468096	0.612433	0.8	1.1	1.3	2.1
0.432887	0.660793	0.83593	1.1	1.5	1.75	2.45
0.477574	0.698508	0.874628	1.15	1.7	2.2	2.75
0.449222	0.632417	0.80986	1.05	1.65	2.2	2.85
0.51026	0.764492	0.962026	1.25	2.1	2.65	3.2
0.764565	1.19259	1.61886	2.05	3.15	3.8	4.5
0.898239	1.52749	2.11932	2.7	3.85	4.3	4.85
0.791525	1.37775	1.88602	2.45	3.35	3.75	4.1
0.751788	1.17009	1.63687	2.15	3	3.55	4.1
0.706659	1.09306	1.49182	1.95	2.9	3.3	3.55
0.532176	0.857355	1.16673	1.5	2.4	2.65	2.95
0.565183	0.855442	1.14792	1.5	2.4	2.95	3.6
0.751046	1.20789	1.61818	2.05	2.9	3.5	3.85
0.752467	1.40267	1.72821	2.05	2.55	2.7	2.9
0.606425	1.0822	1.31285	1.55	1.65	1.8	2.45
0.500771	0.83214	1.1015	1.4	1.65	2.1	3.05
0.497391	0.869371	1.12867	1.45	1.9	2.3	3.1
0.505504	0.792075	1.08713	1.4	1.9	1.95	2.35
0.56642	0.867847	1.14316	1.5	2.2	2.35	2.75
0.712812	1.06684	1.37163	1.8	2.6	3	3.55
0.830663	1.18962	1.54904	2.05	2.75	3.25	3.7
0.805385	1.22644	1.72012	2.3	3.05	3.7	4.05
0.558379	1.12311	1.8178	2.45	3.4	3.95	4.3
0.387066	1.16717	1.88791	2.55	3.4	3.7	4.3
0.424584	1.38277	2.3958	3.05	4.05	4.6	5.55
0.431811	1.3818	2.39835	3.05	4.1	4.45	5.45
0.565788	1.17124	1.52818	2	2.7	2.75	3.35
0.746185	1.14003	1.13974	1.45	2	2.15	2.35
0.528243	0.982306	1.04014	1.25	1.7	1.75	2.05
0.206924	0.526132	0.7091	0.85	1.25	1.35	1.8
0.234169	0.398115	0.584637	0.8	1.3	1.3	1.55
0.316886	0.474032	0.650061	0.85	1.4	1.55	1.55
0.361297	0.558945	0.768261	1	1.6	1.85	1.95
0.494637	0.790074	1.06435	1.4	2.1	2.45	2.55
0.671665	1.06584	1.39998	1.8	2.55	2.95	2.9
0.658616	1.09482	1.4951	1.95	2.6	2.7	2.75
0.439455	0.862111	1.18858	1.55	2	2.1	2.45
0.405168	0.742331	0.859607	1.05	1.45	1.65	2.1
0.193404	0.408023	0.400131	0.5	1.2	1.8	2.6
0.250967	0.597421	0.658284	0.9	1.8	2.25	2.75
0.169625	0.462112	0.713685	1	1.85	2	2.45
0.165847	0.481852	0.85878	1.15	1.75	1.8	2.35
0.188025	0.612434	0.985981	1.3	1.8	1.95	2.7
0.194257	0.629179	1.02883	1.35	1.95	2.25	2.85
0.249881	0.609392	1.07869	1.4	2.1	2.35	2.6
0.24547	0.53252	0.963621	1.25	1.7	1.75	2.05
0.218404	0.453787	0.698238	0.9	1.25	1.4	1.6
0.168196	0.343431	0.422379	0.55	1.05	1.3	1.5
0.131458	0.188201	0.272159	0.35	0.95	1.15	1.65
0.265322	0.500585	0.518919	0.55	1.25	1.65	2.4
0.248712	0.54646	0.658712	0.75	1.25	1.85	2.95
0.336339	0.584829	0.783525	0.95	1.6	1.85	2.35
0.500658	0.746039	0.985392	1.25	1.9	2.05	2.45
0.564204	0.842051	1.12429	1.5	2.25	2.6	3
0.490981	0.751191	1.02978	1.4	2.1	2.4	2.55
0.350562	0.628722	0.884933	1.2	1.75	2.05	1.85
0.251913	0.605784	0.893981	1.15	1.6	1.75	1.65
0.189305	0.491653	0.749968	0.95	1.4	1.5	1.7
0.184979	0.345057	0.454229	0.6	1.05	1.2	1.35
0.173001	0.340432	0.290542	0.35	0.9	1.3	1.6
0.292192	0.674886	0.817019	1.05	1.5	1.65	1.6
0.601881	0.769934	0.946713	0.9	1.1	1	1.1
0.170885	0.243441	0.311097	0.4	0.7	0.8	1.85
0.327915	0.539033	0.711246	0.95	1.65	2.05	2.9
0.380608	0.926876	1.62076	2.15	3.15	3.7	4.05
0.473245	1.27279	2.15122	2.8	3.65	3.75	4.2
0.437672	0.963599	1.40592	1.85	2.35	2.25	3.15
0.341659	0.598237	0.872374	1.2	1.75	2	2.7
0.309286	0.532377	0.726033	1	1.6	1.9	2.45
0.261885	0.523871	0.707169	0.95	1.5	1.65	2.15
0.231215	0.603088	0.90667	1.2	1.8	1.95	2.4
0.403056	0.803564	1.16181	1.55	2.3	2.5	3.2
0.715861	1.17337	1.5789	2.05	2.9	3.4	4.35
1.18046	1.85251	2.55121	3.25	4.35	5.4	6.25
1.21223	2.0873	3.00425	3.9	5.1	6.15	6.6
0.845105	1.67568	2.50075	3.3	4.35	5	5.15
0.699417	1.24396	1.74937	2.3	3.05	3.45	3.65
0.445363	0.715911	0.963212	1.3	1.75	1.95	2.4
0.213159	0.42423	0.622302	0.85	1.35	1.75	2.3
0.211497	0.460188	0.680906	0.9	1.6	2.05	2.7
0.268221	0.653714	1.02993	1.3	2.05	2.3	3.1
0.33338	0.69516	1.01421	1.25	1.8	2.1	2.95
0.4082	0.649464	0.859425	1.1	1.7	2.2	2.9
0.512242	0.835588	1.12756	1.5	2.25	2.75	3.45
0.716508	1.12953	1.5169	2	2.65	2.95	3.65
0.843758	1.27741	1.80768	2.4	3.2	3.7	4.2
1.16149	1.66568	2.43954	3.2	4.35	5.05	5.4
1.28782	1.87248	2.64398	3.4	4.45	5.2	5.75
1.1036	1.56593	2.1227	2.75	3.8	4.9	5.85
1.25685	1.69094	2.32417	3.05	4.3	5.45	6.15
1.15409	1.69256	2.37755	3.2	4.2	5	5.55
0.827086	1.3071	1.84711	2.5	3.25	3.9	4.55
0.665152	0.995557	1.37638	1.8	2.4	3.05	3.65
0.632353	0.959247	1.18089	1.6	2.2	3	3.6
0.877134	1.36066	1.74447	2.35	3.25	4	4.5
0.952022	1.53714	2.10099	2.75	3.75	4.25	4.55
0.869529	1.45271	1.88458	2.35	3.1	3.4	3.2
0.584255	1.10206	1.52524	1.85	2.45	2.8	2.45
0.419155	0.968401	1.47659	1.85	2.45	3	3.15
0.480934	1.13208	1.77633	2.2	2.9	3.55	4
0.474652	1.29906	1.78414	2.25	3.1	3.6	4.1
0.423946	1.13255	1.41089	1.8	2.6	2.9	3.55
0.214762	0.592886	0.933362	1.2	1.95	2.45	3.05
0.205878	0.652834	0.951873	1.3	2	2.4	2.8
0.258073	0.816221	1.07929	1.4	2.05	2.45	3.05
0.372401	0.888066	1.03942	1.2	2.1	2.85	3.35
0.418421	0.927972	0.94939	1.05	2.05	2.75	3.05
0.40918	0.891775	0.868908	0.95	1.7	2.4	2.85
0.401527	0.831524	0.782758	0.9	1.4	2	2.4
0.233274	0.435664	0.499757	0.65	0.85	0.75	1.35
0.318302	0.449533	0.577891	0.7	1.25	1.3	1.6
0.33365	0.57422	0.773762	0.95	1.55	1.75	1.8
0.157954	0.324432	0.448297	0.55	1.05	1.1	1.25
0.091152	0.139245	0.16204	0.2	0.9	1.05	1.45
0.306079	0.468055	0.591793	0.7	1.4	2.05	3.4
0.763483	1.19617	1.55458	1.9	2.7	3.35	4.25
0.927189	1.43291	1.90232	2.45	3.5	4.25	4.95
0.950329	1.48906	2.01709	2.6	3.7	4.45	4.8
0.866216	1.34768	1.82614	2.3	3.15	3.6	3.7
0.665469	0.986733	1.32117	1.7	2.35	2.7	3.2
0.647012	0.990094	1.34013	1.75	2.5	3.15	4.05
0.862543	1.33486	1.79166	2.3	3.35	4.3	5.05
0.744603	1.46753	2.26482	2.9	3.95	4.9	5.35
0.445672	1.32772	2.29726	2.95	3.7	4.2	4.6
0.383621	1.23184	1.87795	2.35	3.3	3.5	4.15
0.697281	1.48609	1.63202	1.9	3.3	3.75	4.4
1.19701	1.9597	1.80484	1.95	3.15	3.75	4
1.16201	1.94093	1.68438	1.9	2.8	3.4	3.7
0.661661	1.43854	1.42421	1.75	2.7	3.35	4.2
0.344272	1.02471	1.50713	1.95	2.85	3.45	4.15
0.339378	0.921422	1.48235	1.95	2.7	3.05	3.45
0.313726	0.807101	1.27209	1.65	2.3	2.65	3.35
0.322859	0.741427	1.16229	1.55	2.25	2.95	3.75
0.640837	1.0946	1.51425	2	2.9	3.6	4.5
0.988631	1.49726	2.06258	2.6	3.6	4.4	5.6
1.17414	1.67871	2.3315	2.85	3.9	5.1	6.1
1.07534	1.53378	2.11979	2.65	3.6	4.45	5.1
0.826067	1.27907	1.76892	2.25	3.1	3.7	4.45
0.730179	1.18514	1.62462	2.1	3	3.85	4.45
0.722134	1.20896	1.64488	2.1	2.9	3.85	4.4
0.748692	1.21367	1.6296	2	2.8	3.7	4.45
0.981866	1.47756	1.99454	2.45	3.5	4.3	5.2
1.27935	1.85584	2.46714	3.1	4.05	4.95	5.95
1.2169	1.74151	2.26932	2.9	3.85	4.55	5.5
0.989506	1.43311	1.8762	2.4	3.5	3.85	4.55
0.987247	1.50638	2.11904	2.65	3.95	4.6	5.2
1.17616	1.91768	2.72255	3.4	4.8	5.65	5.9
0.973982	1.65336	2.32046	3.05	4	4.45	4.3
0.665535	1.09389	1.55156	2	2.6	2.95	2.9
0.9637	1.3478	1.86989	2.1	2.75	3.25	3.3
1.0364	1.4192	1.90913	2.2	2.9	3.3	3.3
0.554534	0.86649	1.14479	1.45	2.1	2.45	2.35
0.372677	0.648827	0.898527	1.2	1.95	2.35	2.35
0.556204	0.874693	1.18988	1.6	2.4	2.95	3.2
0.51047	1.03611	1.64011	2.15	2.9	3.5	3.85
0.305843	0.962095	1.69159	2.2	2.9	3.3	3.75
0.284709	0.907928	1.64207	2.1	2.85	3.35	4.15
0.275372	0.946698	1.7297	2.2	3.05	3.65	4.5
0.554013	1.43846	2.04093	2.6	3.65	4.45	5.45
0.681398	1.79385	2.20616	2.8	3.95	5.1	6.2
0.422256	1.37677	1.81804	2.3	3.45	4.45	5.55
0.347934	1.14162	1.82893	2.3	3.3	3.85	5.25
0.456342	1.5413	2.71189	3.4	4.45	5	6.45
1.00454	2.14932	3.43512	4.35	5.75	6.5	7.6
1.10495	2.07563	3.22886	4.2	5.55	6.3	7.05
0.605318	1.55959	2.74182	3.55	4.65	5.7	6.4
0.451093	1.30473	2.24976	2.85	3.85	4.8	5.7
0.832386	1.56412	2.27328	2.85	3.9	4.6	5.5
1.38895	2.29187	3.10116	3.8	5.2	6.1	6.5
1.6313	2.69057	3.62709	4.45	5.9	6.45	7.05
1.43527	2.22816	3.001	3.8	4.95	5.1	5.75
1.14825	1.66208	2.23986	2.95	3.9	4.1	4.45
1.04215	1.51132	2.06338	2.7	3.5	3.8	4.15
0.782364	1.17791	1.56084	1.95	2.6	2.95	3.3
0.536216	0.823135	1.03308	1.3	1.9	2.15	2.7
0.556161	0.959972	1.33079	1.75	2.75	3.35	4.6
0.672656	1.51365	2.32876	3.05	4.4	5.45	6.6
0.654634	1.91812	3.39879	4.4	5.85	7.25	7.6
0.599247	1.9559	3.69809	4.7	6	7.3	7.85
0.82901	1.93053	3.26375	4.15	5.45	6.6	7.3
1.11883	1.97495	2.91864	3.75	5.1	6.25	6.65
0.977218	1.63786	2.37682	3.1	4.3	4.95	5.3
0.790875	1.22076	1.75251	2.3	3.35	3.9	4.45
0.864039	1.2756	1.80542	2.35	3.25	3.85	4.15
0.874532	1.27113	1.70012	2.25	3.1	3.5	3.5
0.69216	0.984485	1.22173	1.6	2.35	2.6	2.65
0.437184	0.736653	0.971042	1.25	1.95	2.1	2.25
0.450835	0.801518	1.12553	1.45	2.25	2.45	2.9
0.672414	1.0553	1.48013	2	2.9	3.3	3.9
0.580293	1.09127	1.63327	2.25	3.05	3.45	4.1
0.384138	0.944867	1.42058	1.85	2.6	2.95	3.6
0.816772	1.38226	1.55997	1.8	2.75	3.05	3.3
1.32218	1.82579	2.13395	2.35	3.25	3.5	3.55
1.33481	1.83628	2.5311	2.95	3.75	3.95	4.1
1.2075	1.77452	2.13676	2.6	3.2	3.2	3.4
0.533871	0.850804	0.9713	1.15	1.45	1.2	2.2
0.544903	0.883914	1.08108	1.3	1.7	1.65	2.2
0.605562	0.924264	1.303	1.55	2.05	2.25	2.7
0.885118	1.32049	1.93678	2.25	3.2	3.8	4.1
1.27413	1.95804	2.72575	3.25	4.35	4.85	4.7
1.24128	1.81955	2.44233	3.1	4	4.25	4.35
0.968767	1.44135	1.77834	2.25	2.85	3	3.45
0.559835	1.03889	1.29733	1.6	1.95	2.05	2.5
0.250396	0.561754	0.80666	1.05	1.45	1.6	2.2
0.282999	0.518414	0.705671	0.85	1.4	1.55	2.15
0.282024	0.575242	0.752044	0.85	1.4	1.55	1.9
0.322939	0.67084	0.834688	1	1.5	1.5	2
0.467429	0.771117	1.01569	1.3	1.85	1.95	2.75
0.470243	0.705043	0.980379	1.25	1.9	2.3	2.95
0.48625	0.71774	0.950852	1.25	2.15	2.6	2.8
0.491842	0.794465	1.04553	1.35	2.05	2.25	2.6
0.282678	0.680254	0.95202	1.2	1.7	1.8	2.6
0.231513	0.797175	1.18385	1.55	2.2	2.4	3.45
0.292811	0.912481	1.47326	1.95	2.7	3.15	4.15
0.333601	1.0721	1.87882	2.45	3.45	4.15	4.75
0.443555	1.49239	2.67705	3.4	4.7	5.7	7
0.597652	1.92011	3.48297	4.45	5.9	7	8.55
0.750523	2.0531	3.44967	4.5	6	6.9	7.8
0.655667	1.73771	2.82326	3.65	5	5.85	6.7
0.463581	1.48995	2.61031	3.3	4.7	5.5	6.65
0.565764	1.72513	2.45422	3.2	4.45	5.05	6.25
0.56017	1.71273	2.34574	3.1	3.95	4.45	5.75
0.599415	1.76471	2.9165	3.7	4.7	5.5	6.75
1.10474	2.4064	3.54969	4.5	6	6.8	7.55
1.09666	2.26963	3.29495	4.2	5.8	6.55	7.35
0.890119	1.9062	2.87576	3.7	5.2	6.15	7.15
1.09976	2.11521	3.07694	3.95	5.5	6.45	7.15
1.00449	1.9523	3.03815	3.85	5.25	6.3	6.75
0.674985	1.57714	2.66453	3.4	4.55	5.5	6.35
0.510036	1.46406	2.4927	3.2	4.2	5	5.7
0.448428	1.28075	2.23234	2.8	3.75	4.5	5
0.350232	1.05882	2.02084	2.5	3.45	4	4.9
0.36208	1.10446	2.11122	2.7	3.7	4.15	5.25
0.399595	1.09503	1.97778	2.55	3.5	3.9	4.65
0.428799	0.96679	1.50791	1.95	2.8	3.35	3.8
0.406467	1.01898	1.61556	2.05	3	3.6	4.2
0.429578	1.12877	1.87408	2.35	3.35	3.95	4.55
0.397535	1.00468	1.60979	2.05	2.9	3.75	4.3
0.351412	0.973795	1.53143	1.9	2.7	3.5	4.35
0.440802	1.26402	2.15721	2.6	3.5	4.35	5.25
0.479354	1.45696	2.73299	3.35	4.35	5.3	5.75
0.694151	1.46129	2.40254	3.15	4.2	4.8	4.9
0.920054	1.4509	1.99132	2.65	3.55	3.85	3.9
0.153599	0.419497	0.674899	0.85	1.2	1.4	2
0.238285	0.506008	0.769988	1	1.55	1.7	1.85
0.27867	0.496593	0.63708	0.85	1.4	1.55	1.85
0.274266	0.45417	0.553257	0.7	1.25	1.5	1.85
0.176537	0.274479	0.329108	0.4	0.95	1.2	1.45
0.0789338	0.210224	0.277123	0.35	1.05	1.2	1.45
0.149272	0.406168	0.614485	0.8	1.35	1.45	1.85
0.295955	0.56277	0.791821	0.9	1.45	1.6	2.2
0.628701	1.02226	1.13971	1.1	1.55	1.75	2.05
0.807247	1.25651	1.34236	1.35	1.8	2.05	2.15
0.576783	1.11594	1.31528	1.5	2.05	2.45	2.9
0.30075	0.873902	1.26176	1.5	2.1	2.35	2.8
0.297299	0.657936	1.05171	1.25	1.75	1.8	1.8
0.232985	0.395121	0.552159	0.7	1.1	1.1	1.15
0.0987351	0.260026	0.394806	0.5	0.65	0.7	0.95
0.19795	0.615902	1.03075	1.35	1.85	2.1	2.6
0.261571	0.829743	1.40117	1.8	2.45	2.6	3.55
0.262834	0.905835	1.51185	1.85	2.65	3.15	4.4
0.325899	1.18498	2.0633	2.6	3.65	4.5	5.85
0.485157	1.65956	2.28106	2.9	4	4.6	5.85
0.525224	1.45836	1.63652	2	2.9	3.3	4.2
0.408393	1.0649	1.69279	2.1	3.1	3.6	3.85
0.310729	0.942468	1.78251	2.3	3.4	3.8	4
0.453051	0.934928	1.44913	1.9	2.75	3.1	3.7
0.539319	1.01916	1.46898	1.9	2.7	3.15	3.65
0.36774	0.787827	1.22184	1.6	2.4	2.75	3.1
0.323395	0.689882	1.09734	1.5	2.25	2.6	2.85
0.2768	0.639076	1.04186	1.4	2	2.3	2.45
0.228089	0.599314	0.859462	1.1	1.6	1.85	2
0.263126	0.644963	0.712934	0.95	1.85	2.6	3.85
0.255881	0.837244	1.02908	1.3	2.2	2.65	3.65
0.25643	0.841863	1.11276	1.35	2.2	2.4	3.2
0.262195	0.823408	1.11242	1.4	2.2	2.5	3.5
0.366166	1.20088	1.43166	1.75	2.35	2.8	4.25
0.410504	1.40533	1.61282	1.9	2.7	3.6	5.2
0.803052	1.93785	1.94141	2.15	3.5	4.35	5.6
0.934706	2.2005	2.08476	2.35	3.65	4.1	4.85
0.45698	1.29126	1.45172	1.9	2.9	3.45	4.4
0.306383	0.965583	1.38596	1.8	2.75	3.25	4.1
0.382446	1.06125	1.42806	1.8	2.45	2.6	3.4
0.538347	0.977054	1.0742	1.35	2.1	2.15	2.95
0.676267	1.35792	1.51656	1.75	2.6	3	3.5
0.596885	1.43055	1.66397	2.05	2.6	3.05	3.8
0.415063	1.07185	1.21436	1.55	2.35	2.7	3.4
0.271626	0.79157	0.956995	1.15	2.25	2.8	3.3
0.194286	0.533966	0.702	0.9	1.85	2.45	3.2
0.285562	0.753613	0.786579	0.95	1.9	2.6	3.1
0.388151	1.09189	1.03246	1.25	2.1	2.85	2.95
0.430214	1.16226	1.07834	1.25	2.05	2.9	2.95
0.559965	1.24697	1.1503	1.2	2.15	2.95	3.35
0.550835	1.18624	1.10751	1.2	2.35	2.95	3.4
0.554966	1.14749	1.07928	1.25	2.45	3	3.35
0.905804	1.55313	1.42782	1.65	2.6	3.15	3.7
0.80118	1.54443	1.48051	1.8	2.8	3.35	3.95
0.361235	1.0662	1.18978	1.5	2.4	2.95	3.75
0.237838	0.779731	0.95604	1.15	1.85	2.3	3.1
0.218638	0.739022	0.909234	1.1	1.8	1.9	2.65
0.533987	1.12412	1.2035	1.35	2.15	2.2	2.8
0.851497	1.37416	1.35552	1.55	2.25	2.35	2.6
0.720775	1.08963	1.0584	1.25	1.55	1.6	1.9
0.304612	0.476945	0.485726	0.55	1	1.1	1.5
0.146896	0.217184	0.249224	0.3	1.3	1.55	1.6
0.290846	0.445288	0.557056	0.7	1.5	1.65	1.6
0.306004	0.473542	0.603905	0.8	1.35	1.45	1.65
0.305464	0.509881	0.624781	0.8	1.3	1.55	1.85
0.291757	0.513914	0.660775	0.8	1.5	1.55	1.65
0.311724	0.550149	0.646024	0.8	1.2	1.15	1.3
0.240321	0.389544	0.451743	0.6	1.3	1.55	1.75
0.233465	0.502334	0.772691	1.05	1.75	1.95	2
0.271456	0.789634	1.19477	1.45	1.9	1.9	1.8
0.417653	0.858151	0.968793	1.1	1.7	1.7	1.85
0.386525	0.77955	0.743576	0.8	1.35	1.35	1.55
0.204422	0.291708	0.341771	0.35	0.8	0.9	1.3
0.336712	0.505469	0.593239	0.6	0.95	1.1	1.6
0.276603	0.469834	0.446818	0.45	0.9	1.05	1.25
0.108161	0.270244	0.316625	0.35	1.1	1.35	1.85
0.151868	0.412512	0.486916	0.65	1.6	2.15	3.1
0.586399	1.10716	1.13004	1.35	2.55	3.35	4.5
1.4456	2.62696	2.50106	2.75	3.9	4.85	5.7
1.84679	3.1399	3.12515	3.35	4.15	4.7	5.05
2.19201	3.09941	3.10034	3.1	4.05	4.3	4.5
1.90819	2.89139	2.61598	2.75	3.8	4.2	4.45
1.11674	1.91797	1.74924	2.05	3.2	3.85	4.35
1.56129	2.2864	2.25368	2.4	3.75	4.65	5.35
2.79475	3.94704	3.98225	3.95	5.05	5.75	5.8
2.4819	4.38389	4.38439	4.45	5.3	5.85	5.5
0.942029	2.62603	2.66581	2.95	3.9	4.55	4.9
0.404591	1.30302	1.66569	1.9	2.75	3.3	4.4
0.33153	1.10508	1.53281	1.8	2.35	2.85	4.55
0.295075	1.02959	1.63332	2.05	2.65	3.3	4.85
0.305671	1.10013	1.90724	2.4	3.25	3.85	4.7
0.305689	1.10622	1.84886	2.35	3.25	3.65	4.15
0.287095	0.922505	1.65233	2.1	2.85	3.2	3.5
0.327697	0.826108	1.53246	1.95	2.65	2.95	3.05
0.290306	0.702216	1.20271	1.6	2.35	2.8	3
0.238196	0.682978	1.2197	1.65	2.35	2.95	3.35
0.271565	0.788144	1.36567	1.85	2.55	2.75	3.1
0.262358	0.714419	1.1821	1.55	2.15	2.2	2.6
0.224875	0.590184	1.04285	1.3	1.8	2.1	2.55
0.218286	0.605474	0.8871	1.15	1.6	1.85	2.6
0.212671	0.574106	0.712694	0.95	1.3	1.5	2.55
0.191775	0.445679	0.602393	0.8	1.35	1.55	2.2
0.337399	0.681599	0.805845	0.95	1.5	1.55	1.65
0.282344	0.572682	0.658726	0.75	1.2	1.25	1.25
0.084613	0.203042	0.307726	0.4	0.85	0.9	0.95
0.32238	0.444601	0.505533	0.6	0.9	1.05	1.55
0.259772	0.410731	0.491939	0.6	1.05	1.05	1.15
0.221834	0.343541	0.423892	0.5	0.95	0.8	0.95
0.154507	0.240721	0.32512	0.45	1.25	1.15	1.5
0.762806	1.17967	1.5859	2.05	3.2	3.7	4.2
1.14236	1.69398	2.29924	2.95	4.15	5	5.45
0.82965	1.20801	1.63057	2.1	2.9	3.5	3.8
0.440587	0.671059	0.881392	1.15	1.8	2.35	2.85
0.395109	0.63649	0.817708	1.1	1.85	2.5	2.95
0.513749	0.827256	1.04464	1.4	2.15	2.75	3
0.526147	0.852363	1.11617	1.45	2.05	2.35	2.7
0.498182	0.829096	1.09211	1.35	1.9	1.95	2.35
0.932598	1.35985	1.76207	1.95	2.9	3.25	3.35
1.2003	1.63204	2.16546	2.4	3.55	3.85	4.05
0.779072	1.09213	1.51257	1.75	2.65	2.75	3
0.541465	0.827511	1.14492	1.35	2.05	2.1	2.05
0.454381	0.681667	0.883746	1.05	1.55	1.45	1.4
0.0422053	0.129787	0.202811	0.25	0.95	0.85	1.5
0.345816	0.710828	0.986486	1.3	2.4	2.7	3.8
0.705747	1.30111	1.75822	2.25	3.5	4.25	5.1
0.742786	1.2353	1.64235	2.1	3.2	3.85	4.35
0.72326	1.08969	1.43713	1.95	2.95	3.35	4.2
0.780591	1.1524	1.56642	2.1	3	3.4	4.3
0.551905	0.931123	1.35313	1.75	2.45	2.95	3.45
0.283301	0.715652	1.13443	1.45	2	2.3	2.6
0.429646	1.11845	1.39573	1.55	2.15	2.45	2.65
0.96719	1.69385	1.70419	1.7	2.4	2.85	3.15
1.23363	1.97538	1.76587	1.85	2.65	3.15	3.9
0.803254	1.64342	1.53502	1.85	2.9	3.25	4.1
0.351482	0.928152	1.25369	1.7	2.65	2.5	3.3
0.397184	0.838986	1.15677	1.45	2	1.65	2.35
0.465437	0.791682	0.894987	1.1	1.4	1.1	1.7
0.146804	0.204088	0.203599	0.25	0.85	1.1	1.5
0.224208	0.345502	0.337972	0.45	0.95	1.1	1.6
0.0265678	0.0750413	0.119257	0.15	0.95	1.2	2.1
0.148752	0.41409	0.627547	0.85	1.6	1.8	2.3
0.240964	0.662077	0.991781	1.3	1.85	1.85	2.25
0.330826	0.751632	0.87992	1.05	1.5	1.9	2.5
1.07443	1.55292	1.45973	1.65	2.55	3.15	3.3
1.13888	1.74346	1.80973	2.05	2.35	2.3	2.5
0.475778	0.746576	0.905674	1.05	1.15	1.25	1.5
0.162407	0.253155	0.333539	0.45	1.3	1.8	2.5
0.592123	0.880884	1.0988	1.35	2.3	2.45	2.85
0.746881	1.13773	1.40514	1.65	2.25	2.25	2.3
0.420173	0.809374	1.06754	1.3	1.7	1.8	2.4
0.30815	0.807984	1.04867	1.4	2.05	2.55	4
0.688019	1.52765	1.61313	2	3.15	3.95	5.35
0.904399	2.07961	2.14833	2.6	4.3	5.2	6.45
0.661862	1.85799	2.29438	2.9	4.7	5.3	6.7
0.511401	1.58314	2.51475	3.25	4.7	5.35	6.35
0.537967	1.62784	2.87141	3.75	5.2	6.1	6.85
0.559662	1.62696	2.79439	3.7	5	5.65	6.7
0.848821	1.62023	2.43428	3.2	4.35	5.2	6.3
1.12319	1.72717	2.40274	3.1	4.15	4.85	5.35
0.886869	1.34459	1.91939	2.55	3.3	3.65	3.8
0.51172	0.78488	1.12956	1.5	2.15	2.55	2.8
0.323249	0.539646	0.753919	0.95	1.65	1.95	2.35
0.192153	0.31547	0.425465	0.55	1.25	1.35	1.8
0.035557	0.0989832	0.155246	0.2	1.1	1.35	1.75
0.113653	0.320848	0.542002	0.7	1.55	1.7	2.15
0.21141	0.727488	1.00962	1.3	2	2.35	3.15
0.313184	1.08574	1.53511	2	2.7	3.35	4.35
0.632645	1.53887	1.94222	2.45	3.2	3.9	4.95
0.659238	1.65249	1.99915	2.45	3.25	3.9	5.3
0.612667	1.88564	3.12943	3.9	5.2	6.05	7.9
0.871818	2.54777	4.63801	5.75	7.65	8.8	10.7
0.875045	2.44947	4.4933	5.65	7.6	8.9	10.15
0.962203	2.24997	3.85953	4.95	6.5	7.7	8.4
1.14341	2.15637	3.28694	4.3	5.5	6.5	7.25
0.846604	1.77543	2.77795	3.65	4.8	5.7	6.65
0.693807	1.68692	2.75202	3.45	4.45	5.1	5.85
0.917776	1.59932	2.47488	2.95	3.75	4.25	4.7
0.99947	1.46743	2.14168	2.5	3.3	3.9	4.05
0.972771	1.43473	1.89693	2.35	3.15	3.65	3.55
0.733205	1.06464	1.31112	1.7	2.4	2.75	2.95
0.500165	0.722335	0.91547	1.2	1.85	2.2	2.55
0.43094	0.691067	0.890019	1.2	1.85	2.05	2.45
0.365419	0.775495	1.06661	1.45	2	2.1	2.45
0.412784	0.823216	1.18917	1.55	2.25	2.5	2.6
0.422105	0.844061	1.25799	1.6	2.35	2.6	2.75
0.291521	0.783478	1.24424	1.65	2.25	2.45	2.85
0.237778	0.641997	0.995485	1.35	2.1	2.55	3.1
0.206354	0.586185	0.926521	1.2	2.05	2.55	3
0.215561	0.683735	1.16668	1.5	2.15	2.55	3.1
0.252181	0.824668	1.53236	2	2.7	3.1	3.7
0.29593	0.928162	1.83174	2.4	3.4	3.95	4.3
0.651035	1.50658	2.38718	2.8	3.95	4.6	5.15
1.1687	1.94288	2.64326	2.85	3.7	4.3	5
1.41568	1.87006	2.11904	2.25	2.9	3.65	4.4
1.00269	1.79037	2.31074	2.8	3.85	4.5	5.5
0.590249	1.75832	2.80957	3.75	5.1	5.65	6.55
0.556529	1.76944	2.78209	3.65	4.55	5.1	6.05
0.551568	2.02063	3.07748	3.9	4.4	5.35	7.8
0.739593	2.71786	4.53228	5.55	6.85	8.4	11.15
0.935784	3.35726	5.94431	7.25	9.45	10.95	12.3
1.19444	3.37214	5.63031	6.95	9.1	10.35	11.25
0.968927	2.37917	4.0667	5.05	6.7	7.75	8.45
0.646081	1.50755	2.57119	3.3	4.7	5.6	6.25
0.881654	1.50309	2.14614	2.85	4	4.8	5.75
0.965034	1.67782	2.44396	3.2	4.15	5.05	6.4
0.676192	1.59445	2.7182	3.45	4.55	5.6	6.75
0.489886	1.52894	2.82296	3.55	4.8	5.8	6.25
0.560071	1.5649	2.64886	3.4	4.4	5.15	5.25
0.543525	1.33773	2.09405	2.7	3.4	3.9	4.15
0.714269	1.22911	1.79822	2.4	3.25	3.6	4
0.928752	1.31226	1.80267	2.5	3.55	3.95	4
0.925321	1.32007	1.77872	2.35	3.35	3.6	3.4
0.765703	1.09748	1.50192	1.95	2.7	2.75	2.6
0.542887	0.782702	1.05218	1.4	2	2.1	2.25
0.355138	0.559276	0.760344	1	1.5	1.55	1.95
0.163467	0.589256	0.973796	1.25	2.2	2.2	2.4
0.331267	1.14867	1.87839	2.45	3.2	3.15	3.2
0.321884	1.03606	1.71535	2.25	2.95	3.35	4.1
0.401698	1.32701	2.34835	3	4.3	5.1	6.2
0.515323	1.75451	3.15485	4	5.6	6.55	7.8
0.49046	1.68587	2.97736	3.8	5.1	6.15	7.3
0.46693	1.58267	2.93434	3.8	5.15	6.05	7.3
0.557823	1.78219	3.35795	4.3	5.75	6.65	7.85
0.861297	2.11571	3.59685	4.55	5.85	7	7.65
0.857697	2.10804	3.23939	4.05	5.05	6.15	7.75
0.667197	1.885	2.84503	3.3	4.6	5.65	7.75
0.890633	2.42254	4.05635	4.75	6.95	8.9	10.45
1.27283	2.63781	4.29498	5.3	7.3	9.3	10.5
1.43124	2.01119	2.93723	3.55	4.75	5.45	5.85
1.2978	1.64794	2.45318	2.7	3.6	4	4.15
1.22675	1.43158	2.13262	2.2	2.95	3.5	3.85
1.18355	1.34254	1.9168	1.95	2.7	3.5	4
1.12216	1.38659	1.85871	1.85	2.6	3.5	4.05
0.297194	0.499371	0.716633	0.85	1.3	1.55	2.6
0.233697	0.481731	0.789474	1	1.5	1.95	2.4
0.370877	0.679029	1.0429	1.3	1.9	2.3	2.6
0.586642	0.88365	1.15145	1.25	1.85	2.05	2.6
0.639405	0.843473	1.07147	1.05	1.7	2.05	2.75
0.511327	0.72552	0.933961	1	1.65	2.05	2.45
0.292881	0.55054	0.64115	0.75	1.25	1.4	1.55
0.170303	0.419848	0.570978	0.7	1.2	1.35	1.6
0.281521	0.569798	0.853331	1.05	1.55	1.7	2.05
0.32368	0.520402	0.663755	0.8	1.35	1.3	1.6
0.165861	0.247491	0.314002	0.4	1.05	1.1	1.25
0.32741	0.488763	0.619616	0.8	1.35	1.35	1.65
0.287794	0.43851	0.573831	0.75	1.2	1.5	1.95
0.222883	0.364748	0.472623	0.6	0.95	1.35	1.95
0.252314	0.433906	0.557595	0.7	1.35	1.7	2.35
0.484201	0.768084	0.9869	1.25	2.1	2.55	3.15
0.758593	1.03141	1.38166	1.6	2.35	3.05	3.9
1.1117	1.46456	2.02239	2.35	3.45	4.3	5.6
1.37915	1.90756	2.59508	3.25	4.6	5.4	6.35
1.27203	1.79808	2.4433	3.1	4.05	5.05	5.95
1.27103	1.95238	2.68096	3.2	4.15	5.4	6.6
1.38501	2.28779	3.21385	3.75	5.05	6.45	7.2
1.20915	2.06394	2.90758	3.5	4.7	6	6.8
1.18558	2.04235	2.77617	3.5	4.6	5.65	6.45
1.1907	2.02384	2.66084	3.35	4.5	5.2	5.75
1.06322	1.77533	2.19178	2.65	3.75	4.1	4.9
0.849504	1.4271	1.71706	2.05	3	3.45	4.6
0.759243	1.22855	1.56101	1.9	2.8	3.4	4.6
0.75739	1.16675	1.65062	2.15	2.9	3.4	4.55
0.572533	0.903354	1.29894	1.8	2.55	3.05	4.1
0.65443	1.02457	1.29328	1.75	2.5	3.05	3.75
0.702936	1.07808	1.34794	1.8	2.3	2.75	3.25
0.553242	0.825222	1.07008	1.4	1.9	2.3	2.85
0.520317	0.740762	0.91516	1.15	1.9	2.45	3.3
0.682689	1.0054	1.33336	1.55	2.7	3.35	3.9
0.829617	1.20157	1.64446	1.9	2.85	3.35	3.5
0.531185	0.817423	1.11012	1.35	1.85	2.1	2.65
0.184593	0.471381	0.769588	1	1.55	1.6	2.25
0.183281	0.551019	0.890557	1.2	1.7	1.95	2.3
0.244411	0.543658	0.798291	1.1	1.5	1.8	1.95
0.252674	0.404205	0.487307	0.65	1	1.1	1.2
0.441869	1.01974	1.37395	1.65	2.3	3.05	4.9
0.662866	1.72694	2.68958	3.4	4.35	5.55	7.25
0.86263	1.71257	2.62403	3.35	4.4	5.3	5.8
0.800809	1.21907	1.74776	2.2	3.15	3.55	3.7
0.709781	1.03633	1.4017	1.75	2.55	2.7	2.55
0.667918	1.13426	1.57338	2	2.7	2.95	3
0.694592	1.18337	1.66405	2.1	2.9	3.35	4.1
0.698061	1.05671	1.49908	1.85	2.6	3.2	4.35
0.829365	1.25813	1.69791	2.1	2.95	3.6	4.55
0.922059	1.43617	1.7849	2.25	3.25	3.95	4.65
0.741121	1.17556	1.53228	1.9	2.75	3.55	4.3
0.699312	1.09072	1.46269	1.7	2.45	3.15	4.2
0.752638	1.21272	1.5996	1.9	2.65	3.3	4.75
0.998304	1.5818	2.05602	2.45	3.5	4.25	5.55
1.24972	1.89443	2.45766	2.85	3.95	4.75	5.75
1.1904	1.71565	2.28266	2.75	3.65	4.45	5.5
1.01275	1.57974	2.08645	2.55	3.6	4.5	5.15
0.811736	1.3712	1.84403	2.25	3.3	4.1	4.5
0.59746	0.937358	1.26854	1.6	2.3	2.85	3.6
0.521376	0.769116	1.04648	1.35	2	2.55	3.35
0.843579	1.10058	1.44487	1.65	2.5	2.95	3.25
1.08654	1.38994	1.62884	1.7	2.5	2.7	2.9
0.792415	1.08309	1.27611	1.45	2.1	2.25	2.75
0.561723	0.885978	1.17802	1.45	2.15	2.55	3.7
0.942805	1.54382	2.03312	2.5	3.5	4.35	6.25
1.45951	2.32778	3.26137	4	5.4	6.5	8.4
1.4983	2.31578	3.19989	3.9	5.25	6.25	7.95
1.3848	2.03275	2.71046	3.35	4.55	5.4	6.5
1.27679	1.78335	2.52006	3.2	4.6	5.5	6
1.17337	1.58463	2.20785	2.8	4.05	4.85	5.1
0.975044	1.36461	1.81248	2.3	3.25	3.8	3.8
0.749386	1.17619	1.54941	2	2.8	3.15	3.3
0.707219	1.15985	1.51451	1.95	2.55	2.55	2.65
0.596628	0.968272	1.25478	1.65	2.15	2	1.9
0.477404	0.761862	0.997399	1.3	1.8	1.85	2.05
0.38251	0.665333	0.833598	1.05	1.6	1.95	2.4
0.404174	0.683888	0.855692	1.05	1.6	2.05	2.35
0.430225	0.636911	0.794751	0.95	1.55	2.05	2.45
0.4208	0.620773	0.796191	0.95	1.8	2.4	2.8
0.353964	0.591048	0.848578	1.05	1.9	2.25	2.55
0.20839	0.477041	0.779403	1	1.7	1.9	2.2
0.217947	0.612346	1.00409	1.25	1.9	2.2	2.5
0.222762	0.649625	1.06205	1.3	1.8	2.05	2.5
0.29491	0.663847	1.07458	1.35	1.85	2	2.45
0.631667	1.02935	1.48832	1.8	2.3	2.35	2.75
0.585895	1.00819	1.35075	1.7	2.25	2.75	4.35
0.743173	1.34917	1.91199	2.5	3.15	3.85	5.2
1.4414	2.17788	2.81782	3.3	4.75	6.1	7.15
1.88719	2.87908	3.74069	4.05	6.2	8	8.65
1.82518	2.82362	3.9172	4.2	6.05	7.35	7.85
1.81945	2.45111	3.37529	3.65	5.1	6.05	6.2
1.38926	1.86488	2.46509	2.7	3.75	4.45	4.75
1.11838	1.654	2.19739	2.35	3.1	3.9	4.65
1.12757	1.78412	2.45944	2.65	3.65	4.55	5.5
1.28187	1.86838	2.57964	2.9	4	5.05	5.85
1.38464	1.91823	2.55795	2.85	3.95	5.1	5.75
1.14356	1.7507	2.38931	2.65	3.85	4.85	5.7
1.01835	1.59258	2.15402	2.5	3.5	4.25	5.05
0.938372	1.48952	1.9287	2.4	3.25	3.95	4.8
0.936343	1.46579	1.91094	2.45	3.3	4	5.1
1.40466	2.0444	2.71238	3.45	4.6	5.3	6
1.68405	2.39819	3.24001	4.1	5.45	6.65	6.9
1.47962	2.11	2.78226	3.45	4.65	6.05	6.85
1.28708	1.87713	2.41861	2.9	3.8	4.6	5.7
0.912016	1.36736	1.84349	2.3	2.95	3.3	3.9
0.626574	0.969647	1.38444	1.8	2.45	2.75	2.95
0.579258	0.853915	1.20683	1.55	2.1	2.35	2.8
0.480397	0.755361	1.03087	1.2	1.95	2.95	4.25
0.93969	1.31245	1.78701	2.05	2.85	3.75	4.55
1.32739	1.8388	2.51154	2.6	3.6	4.3	4.6
1.16085	1.67334	2.37645	2.45	3.65	4.4	4.5
0.907774	1.28787	1.75845	2	3	3.75	4.2
0.735219	1.08397	1.40114	1.65	2.4	3.05	3.75
0.626437	0.905709	1.18824	1.4	2.15	2.7	3.25
0.581813	0.77886	1.05096	1.25	1.85	2.35	3.25
0.799382	1.24484	1.79655	2	2.95	3.95	5.8
1.18287	2.0498	2.91652	3.35	4.9	6.35	8
1.18461	2.1109	2.87212	3.4	4.9	6.45	7.8
1.05491	1.80156	2.46374	2.9	4.2	5.45	6.75
1.07062	1.73409	2.43874	2.85	4.05	5.1	6.1
1.35834	2.14121	2.96599	3.4	4.7	5.95	6.8
1.51272	2.36473	3.29984	3.75	5.1	6.4	7.2
1.83982	2.57195	3.55986	3.85	5.35	6.7	7.35
2.25153	2.54223	3.68774	4	5.45	6.45	6.65
2.01894	2.37319	2.94659	3.35	4.2	4.85	5.5
1.46871	2.25294	2.646	3.05	3.85	4.7	5.65
1.05293	1.78876	2.52638	2.95	4.1	5.05	5.8
1.03168	1.71342	2.31398	2.8	4.1	5.1	6.1
1.36269	2.15564	2.89162	3.55	4.95	5.95	6.95
1.36498	2.12605	2.93619	3.7	4.8	5.7	6.65
1.62797	2.65844	3.66606	4.5	5.95	7.35	8.55
1.87215	3.20915	4.48046	5.25	7.2	8.95	9.9
1.45068	2.47848	3.61027	4.1	5.85	7.4	7.9
1.44914	2.35174	3.14105	3.65	5.1	6.15	6.5
1.61519	2.40603	3.0071	3.45	4.65	5.25	5.95
1.75343	2.45682	3.313	3.6	4.95	5.8	6.9
1.74612	2.61373	3.75978	4.15	5.85	6.95	7.7
1.57593	2.46681	3.47481	4.1	5.9	7	7.2
1.5481	2.32269	3.11074	3.75	5.15	5.95	6
1.16902	1.77587	2.49708	2.95	4	4.55	4.55
0.774959	1.19581	1.64164	2	2.8	3.25	3.6
0.690982	0.988602	1.23455	1.5	2	2.35	2.85
0.542708	0.766982	1.04763	1.3	1.7	2	2.45
0.522231	0.79597	1.07714	1.3	1.75	1.9	2.7
0.592267	0.926953	1.28175	1.5	2.1	2.45	3.4
0.607337	0.926635	1.28807	1.55	2.25	2.8	3.65
0.583453	0.897584	1.23062	1.55	2.3	2.85	3.6
0.842561	1.39441	1.84054	2.3	3.15	3.9	4.9
1.0855	1.81209	2.41626	2.9	3.95	4.9	6.3
1.02399	1.59239	2.16896	2.65	3.8	4.75	6
1.37679	2.04686	2.64713	3.2	4.4	5.25	6.6
2.05661	2.95859	3.77725	4.6	6.3	7.6	9.4
2.18882	3.24991	4.3833	5.45	7.4	8.9	10.6
1.89465	3.02102	4.40454	5.2	7.1	8.35	9.75
1.79141	2.92434	4.43367	5.1	7.05	8.15	8.9
1.76625	2.92691	4.22904	4.8	6.65	7.75	8.35
1.47405	2.51711	3.4937	3.95	5.65	6.9	7.95
1.48708	2.40204	3.42816	3.8	5.45	6.75	7.85
1.98967	2.89849	4.09819	4.15	5.9	7.3	7.75
1.77495	2.59694	3.53253	3.55	5.2	6.35	6.4
1.16482	1.74811	2.26458	2.4	3.55	4.25	4.8
1.06029	1.55806	1.93308	2.15	2.9	3.25	3.75
0.879835	1.389	1.77193	2.15	2.9	3.2	3.55
0.589567	0.971648	1.36407	1.75	2.45	2.7	3.1
0.485008	0.717211	0.971912	1.2	1.8	2.1	2.35
0.478523	0.732738	0.972235	1.2	1.8	2.3	2.6
0.508931	0.817312	1.07291	1.4	2	2.55	3.1
0.68818	1.05441	1.42551	1.75	2.55	3.05	3.6
0.775828	1.17989	1.7095	2.1	2.95	3.35	4
0.720565	1.19289	1.82853	2.4	3	3.3	3.95
0.712863	1.30954	1.9358	2.6	3.45	3.95	4.7
0.778705	1.4129	2.02913	2.65	3.65	4.45	5.65
1.38677	2.19895	2.92853	3.65	5	6.2	7.85
2.01265	3.1874	4.44413	5.05	7.15	9	11.05
2.48458	3.59952	5.43622	5.8	8.2	10.15	11.4
2.88988	3.5907	5.60583	5.9	8.4	9.95	10.4
2.64867	3.282	5.02715	5.35	7.4	8.35	8.6
2.15898	2.68715	3.85649	4.15	5.6	6.4	6.6
1.80565	2.41916	3.41117	3.55	5	5.85	6.1
1.71866	2.43799	3.11605	3.3	4.55	5.05	5.4
1.28553	1.81879	2.23348	2.55	3.4	4	4.9
1.00214	1.49467	2.04042	2.4	3.2	3.75	4.45
0.841004	1.26517	1.7939	2.15	2.9	3.1	3.4
0.493837	1.13262	1.82556	2.35	3.05	3.25	3.75
1.24226	2.18074	2.62633	3.05	3.6	3.8	4.25
1.17975	1.87243	1.99987	2.15	2.35	2.6	3.15
0.344044	0.727617	1.01708	1.2	1.45	1.8	3.05
0.288578	0.765476	1.20102	1.6	2.35	2.75	3.95
0.437101	0.873865	1.33209	1.8	2.55	2.8	3.45
0.824114	1.07767	1.4563	1.7	2.35	2.6	3.15
1.14184	1.4464	1.84376	2.1	3	3.55	4.4
1.36386	1.81137	2.17831	2.35	3.25	3.9	4.75
1.25195	1.76959	2.14502	2.25	3.05	3.55	4.15
0.876298	1.34901	1.74663	2.1	2.8	3.15	3.9
0.78776	1.22458	1.59609	2.05	2.9	3.4	4.25
0.779699	1.24897	1.74484	2.3	3.3	3.8	4.75
0.844689	1.51205	2.09318	2.65	3.55	3.85	5
0.991647	1.74614	2.28513	2.85	3.75	4.3	5.65
1.42147	2.39264	3.27434	3.95	5.35	6.3	7.5
1.78257	3.06237	4.22722	5.1	7.1	8.35	9.05
1.66217	2.67645	3.66634	4.7	6.65	7.8	8.6
1.43679	2.37085	3.29588	4.25	5.85	6.9	7.65
1.17832	2.03064	2.88855	3.65	5	6.1	6.2
0.90189	1.37085	1.90199	2.45	3.4	3.95	4.1
0.772652	1.10557	1.52898	2	2.65	3.05	3.55
0.768286	1.12416	1.59833	2.15	2.8	3.4	3.7
0.72757	1.08692	1.48741	2.05	2.7	3.15	3.1
0.572356	0.900152	1.19146	1.6	2.15	2.4	2.55
0.390455	0.634478	0.823299	1.05	1.4	1.5	2.05
0.231284	0.375813	0.485206	0.6	1	1.05	1.6
0.104493	0.255413	0.365302	0.5	1.2	1.25	1.9
0.241376	0.521536	0.738301	1	1.55	1.5	1.9
0.373396	0.656175	0.867788	1.15	1.8	1.8	2.15
0.527335	0.880791	1.1412	1.5	2.25	2.3	2.55
0.388151	0.754152	1.05931	1.4	1.9	2.05	2.45
0.18248	0.482631	0.785256	1.05	1.5	1.9	2.35
0.262361	0.621222	0.90345	1.15	1.6	2	2.35
0.272448	0.605735	0.756023	0.9	1.4	1.6	2.1
0.0556345	0.0942782	0.121362	0.15	0.6	0.9	1.35
0.173042	0.282075	0.355066	0.45	1	1.3	1.75
0.324229	0.5058	0.659626	0.85	1.5	1.8	2.25
0.424389	0.690155	0.918035	1.2	1.7	2.05	2.4
0.563087	0.864193	1.1079	1.45	2.05	2.4	3.2
0.775495	1.12932	1.47214	1.85	2.65	2.95	4.35
0.941254	1.42611	1.91447	2.4	3.35	3.75	5.15
1.15059	1.67159	2.29009	2.9	4.2	5.2	6.15
1.39684	1.98633	2.77642	3.45	4.75	6	6.45
1.29744	1.92571	2.66388	3.35	4.5	5.45	5.95
0.94762	1.50177	2.03758	2.65	3.7	4.25	4.75
0.703505	1.15707	1.56309	2.05	2.85	3.15	3.5
0.516731	0.826834	1.10235	1.45	1.9	2.25	3
0.426912	0.808873	1.11128	1.45	1.95	2.4	2.75
0.454665	0.936674	1.36818	1.8	2.35	2.6	2.5
0.278891	0.64971	0.943087	1.25	1.65	1.75	1.75
0.309672	0.606185	0.844482	1.1	1.55	1.75	2
0.423556	0.738931	0.990567	1.25	1.75	1.85	2.55
0.526476	0.874142	1.15888	1.45	2.15	2.3	3.1
0.630316	0.963436	1.30638	1.65	2.45	3.05	3.75
0.667023	1.05388	1.43279	1.9	2.6	3.15	3.7
0.597179	0.963402	1.3036	1.75	2.3	2.6	3
0.517219	0.820935	1.08132	1.4	1.95	2.2	2.55
0.460743	0.715904	0.931772	1.25	1.75	1.95	2.35
0.379716	0.625924	0.792698	1.1	1.5	1.7	2.3
0.492173	0.798598	1.0562	1.35	2	2.65	3.7
0.725791	1.15345	1.59141	1.95	2.9	4.15	5.4
1.08892	1.82	2.36904	2.95	4.1	5.2	5.95
1.10933	1.99598	2.63924	3.3	4.5	5.5	6.65
1.16131	1.98693	2.72258	3.35	4.7	6.05	7.4
1.37541	2.05218	2.79818	3.45	4.8	6.15	6.9
1.15914	1.73375	2.37008	2.9	4.2	5.45	6.3
1.21689	1.98927	2.79501	3.35	5	6.15	6.7
1.41359	2.27809	3.34071	3.95	5.6	6.65	6.9
1.18827	1.92729	2.86093	3.5	4.85	5.75	6.1
1.06851	1.59454	2.27793	2.9	3.95	4.45	4.65
1.04378	1.40975	1.84639	2.3	3.05	3.15	3.45
0.916442	1.30824	1.61801	2	2.65	2.7	3.25
0.846199	1.21517	1.52483	1.9	2.55	2.7	3.25
0.684497	1.00215	1.29917	1.65	2.15	2.3	2.8
0.450622	0.749189	0.998438	1.3	1.7	2.05	2.85
0.366666	0.656918	0.826793	1.1	1.6	2.05	3
0.460569	0.793224	1.05633	1.4	2.05	2.55	3.05
0.525154	0.923509	1.26431	1.65	2.3	2.75	3
0.424261	0.899683	1.23919	1.6	2.15	2.3	2.9
0.241928	0.676433	1.03443	1.3	1.8	1.95	2.9
0.196529	0.526549	0.841852	1.05	1.65	2.05	2.7
0.281072	0.527753	0.756074	0.95	1.6	2.05	2.45
0.369716	0.638553	0.872366	1.1	1.65	1.9	2.3
0.379569	0.648732	0.892339	1.15	1.65	1.7	2.05
0.298961	0.476723	0.68411	0.85	1.3	1.55	2.2
0.524227	0.76228	1.03859	1.25	1.85	2.3	3.3
0.953549	1.48249	2.0746	2.45	3.5	4.05	4.85
1.10262	1.70956	2.48718	2.95	4	4.5	4.85
0.978404	1.42877	1.97004	2.4	3.05	3.3	3.6
0.631094	0.961115	1.26691	1.6	2.3	2.7	3.2
0.507007	0.808871	1.08275	1.5	2.3	3	3.75
0.725045	1.1189	1.52839	2.05	2.8	3.55	4.4
0.729076	1.23187	1.76435	2.25	3.3	3.9	4.7
0.555342	1.35757	2.03748	2.5	3.7	4.1	4.6
0.796745	1.85402	2.15435	2.45	3.4	3.55	3.6
0.784078	1.66401	1.61984	1.75	2.5	2.55	2.6
0.337304	0.85413	1.02464	1.2	1.85	2.05	2.65
0.182907	0.577627	0.933006	1.2	2.05	2.4	3.2
0.440719	0.899816	1.43806	1.9	3	3.55	4.1
0.79384	1.2474	1.7904	2.4	3.2	3.6	3.9
0.821015	1.19016	1.64608	2.15	2.8	2.95	3.3
0.685342	0.98896	1.39847	1.75	2.5	2.85	3.65
0.692936	1.06779	1.40619	1.8	2.55	2.95	3.75
0.750915	1.25062	1.62271	2.15	2.7	2.9	3.5
0.675646	1.12279	1.549	2	2.35	2.55	2.85
0.453542	0.804092	1.15708	1.45	1.85	2.05	2.1
0.236173	0.474681	0.706589	0.95	1.4	1.4	1.6
0.414032	0.642494	0.79558	1.05	1.65	1.75	1.8
0.777606	1.04834	0.993655	1.2	1.9	1.95	2.8
1.22018	1.9088	1.93857	2.2	3	3.1	3.55
0.971665	1.63161	1.69403	1.75	2.2	2.45	2.7
0.441938	0.804281	0.93667	1.15	1.75	2	2.5
0.216386	0.541269	0.806275	1	1.65	1.75	2.35
0.19503	0.608868	0.804915	0.95	1.65	1.85	2.6
0.293043	0.452824	0.627183	0.8	1.05	1.55	2.25
0.410948	0.643485	0.845543	1.15	1.65	1.9	2.35
0.388604	0.609835	0.762079	1.05	1.65	2	2.65
0.37201	0.582102	0.742661	0.95	1.7	2.4	3.2
0.365901	0.622267	0.825555	1	1.75	2.5	3.2
0.374403	0.647607	0.897032	1.1	1.75	2.2	2.9
0.406775	0.6866	0.966463	1.25	1.9	2.2	2.8
0.524356	0.812855	1.17223	1.5	2.15	2.4	2.75
0.559597	0.879446	1.18911	1.55	2.05	2.2	2.35
0.488258	0.815941	1.01655	1.3	1.65	1.7	1.85
0.346039	0.581545	0.730892	0.9	1.25	1.25	1.45
0.196216	0.331307	0.424411	0.55	0.9	0.9	1.05
0.0492815	0.145335	0.184819	0.25	1.05	1.15	1.5
0.0862514	0.26213	0.303175	0.4	1.1	1.05	1.45
0.0580376	0.152739	0.195706	0.25	1.15	1.35	2.05
0.197008	0.322734	0.39949	0.5	1.3	1.55	2
0.353241	0.619615	0.878953	1.15	2.05	2.25	2.45
0.552971	0.913908	1.32099	1.75	2.55	2.75	2.95
0.677548	1.11047	1.61359	2.1	2.65	2.65	3
0.502706	0.912186	1.32687	1.7	2	2	2.45
0.341791	0.671489	0.964977	1.25	1.55	1.5	1.7
0.106776	0.226079	0.367476	0.5	0.95	0.95	1.05
0.234227	0.375924	0.496784	0.6	1.1	1.15	1.6
0.545781	0.685797	0.883849	0.95	1.3	1.65	2.15
0.335985	0.489674	0.652994	0.8	1.3	1.65	2.1
0.19266	0.360638	0.501099	0.65	1.1	1.35	1.9
0.313345	0.499272	0.715456	0.9	1.55	1.8	2.45
1.03826	1.48561	2.04417	2.35	3.45	4.15	4.45
1.89705	2.36788	3.03432	3.3	4.2	4.75	4.8
1.76484	2.01338	2.46308	2.55	3.1	3.2	3.4
1.08866	1.47593	1.85923	1.95	2.5	2.65	2.95
0.752638	1.17186	1.50882	1.75	2.45	2.6	2.95
0.58584	0.918265	1.26479	1.65	2.4	2.55	2.65
0.549811	0.954656	1.21503	1.5	2.1	2.5	2.6
0.790634	1.13921	1.44305	1.6	2.35	2.75	2.75
0.906819	1.1227	1.48813	1.55	2.25	2.3	2.35
0.666307	0.915804	1.14873	1.25	1.85	2.05	2.65
0.555725	0.920047	1.2016	1.5	2.2	2.6	3.1
0.488076	0.874092	1.23789	1.55	2.15	2.4	2.55
0.366039	0.59763	0.816871	1.1	1.5	1.6	1.85
0.327527	0.455823	0.533183	0.7	0.95	1.05	1.4
0.320804	0.428279	0.549776	0.6	0.85	0.8	1.05
0.224452	0.432377	0.645412	0.85	1.35	1.55	2.35
0.256074	0.483393	0.739458	1	1.6	1.85	2.3
0.223109	0.436598	0.681645	0.9	1.4	1.6	2.1
0.12373	0.354894	0.60508	0.8	1.25	1.7	2.55
0.151062	0.450964	0.815508	1.05	1.65	2.35	3
0.234176	0.711469	1.15165	1.5	2.45	3.1	3.5
0.404418	1.19538	1.65913	2.1	3.1	3.65	4.05
0.436537	1.37553	1.97508	2.4	3.4	3.8	4.7
0.84591	1.81346	2.24612	2.45	3.55	3.95	5.5
1.02557	2.00746	2.30478	2.45	3.45	4.05	5.55
0.742886	2.17547	2.5037	3.05	4.25	5.4	7.1
0.846657	2.9915	4.45464	5.6	7.6	9.4	11.15
0.986443	3.13453	5.69419	7.1	9.35	11.2	12.05
1.18138	2.76301	4.60746	5.85	7.65	8.95	9.25
1.25134	2.22223	3.21842	4.2	5.75	6.5	6.8
1.08714	1.72189	2.37394	3.05	4.35	5	5.35
1.00341	1.49104	2.02985	2.45	3.5	4.2	4.7
0.915648	1.40239	1.96767	2.3	3.25	3.85	4.2
0.884342	1.31738	1.79154	2.1	2.9	3.35	3.6
0.930316	1.27641	1.7241	2.05	2.95	3.45	4.2
0.994289	1.48519	2.0086	2.5	3.9	4.65	5.7
1.4544	2.10559	2.89633	3.65	5.25	6	6.35
1.40188	2.02948	2.79	3.55	4.7	4.85	5.15
1.22007	1.863	2.45307	3.1	3.95	4.05	4.65
1.24013	1.81226	2.38029	3	3.8	4.35	4.9
1.01819	1.50921	1.91688	2.45	3.1	3.75	4.5
1.10616	1.66764	2.16761	2.75	3.65	4.3	4.8
0.909092	1.53658	2.30091	2.95	4.05	4.55	4.8
0.568955	1.22746	1.79733	2.25	3	3.5	4.35
0.398929	0.953652	1.16562	1.35	2.15	2.6	3.65
0.229924	0.634514	0.938257	1.15	2.15	2.55	3.4
0.223834	0.659329	0.984524	1.35	2.1	2.45	3.25
0.238001	0.678265	0.949813	1.3	1.85	1.95	2.55
0.196746	0.512171	0.774406	1	1.5	1.6	2.2
0.244805	0.479016	0.681049	0.9	1.5	1.8	2.15
0.40164	0.606429	0.784344	1.05	1.75	2.1	2.2
0.36082	0.622615	0.88003	1.2	1.85	2.25	2.7
0.374237	0.645852	0.91462	1.2	1.9	2.25	2.75
0.515115	0.854124	1.1226	1.45	2.1	2.4	2.7
0.443037	0.899895	1.33535	1.75	2.4	3	3.5
0.418184	1.0075	1.57959	2.1	3.05	3.7	4.25
0.457314	1.07622	1.72112	2.25	3.2	3.85	4.7
0.452459	0.972634	1.4895	1.9	2.8	3.45	4.35
0.731675	1.32944	1.77734	2.3	3.2	3.8	4.15
0.933895	1.59614	2.19804	2.8	3.8	4.5	4.7
0.686425	1.39667	2.12462	2.7	3.7	4.3	4.75
0.408167	1.07218	1.85875	2.45	3.5	4.05	4.7
0.445929	0.940753	1.68045	2.25	3.25	3.65	4.2
0.395448	0.813076	1.37019	1.85	2.55	2.8	3.15
0.273714	0.865274	1.42272	1.85	2.65	3.15	3.85
0.411177	1.37989	2.29951	2.9	4.15	5.1	6.5
0.654565	1.94582	2.4758	3.05	4.3	5.1	6.35
0.60487	1.70601	1.68073	2	3.1	3.55	4.25
0.3442	1.08424	1.39891	1.7	2.85	3.55	4.6
0.609945	1.64503	2.49563	3	4.4	5.05	6.45
1.39862	2.67989	3.14597	3.55	4.75	5.1	5.75
1.28508	2.45383	2.66358	2.85	3.95	4.55	5.1
0.779641	2.15601	2.92232	3.25	4.6	5.2	6.65
0.734604	2.13888	2.74078	3.1	4.15	4.65	6.05
0.556611	1.79204	2.14602	2.55	3.55	4.4	5.5
0.50638	1.79231	2.15379	2.65	3.95	5.25	6.35
0.704921	2.03463	2.3941	2.65	4.7	6.1	6.95
1.18824	3.19037	3.28609	3.5	5.5	6.7	6.9
1.9349	3.71608	3.49932	3.75	4.95	5.75	5.45
1.47012	2.30726	2.14504	2.1	2.6	2.8	3.2
0.33107	0.773892	1.09374	1.4	1.9	2.2	2.65
0.302068	0.686482	1.06042	1.4	1.75	2	2.25
0.265036	0.624535	1.01135	1.3	1.7	1.9	1.85
0.352861	0.652325	1.01363	1.35	1.8	1.95	1.9
0.497045	0.727977	0.962008	1.25	1.7	1.9	1.9
0.438616	0.665574	0.89629	1.15	1.7	1.8	1.7
0.492863	0.837472	1.07373	1.4	1.95	2.1	2.4
0.569422	0.939677	1.15973	1.5	2.35	2.8	3.45
0.524335	0.828646	1.14056	1.5	2.4	2.7	3
0.542505	0.835027	1.14541	1.45	2.05	2.4	2.45
0.759365	1.09191	1.3883	1.6	2.2	2.75	3.25
1.02281	1.56337	2.08679	2.45	3.4	4	4.9
1.15893	1.84261	2.53373	3.15	4.35	5.2	5.85
1.12598	1.70563	2.33569	3	4.2	5.1	5.55
1.3144	1.86145	2.4373	2.8	3.8	4.4	4.85
0.792028	1.06163	1.61077	2	2.2	2.05	2.2
0.473937	0.714327	0.960183	1.25	1.5	1.55	2
0.398665	0.591249	0.752188	0.95	1.5	2.05	2.8
0.454024	0.702434	0.97261	1.4	2	2.25	2.55
0.45034	0.66695	0.923921	1.35	1.75	1.85	1.75
0.301309	0.529855	0.750221	1	1.5	1.55	1.45
0.213092	0.550735	0.906111	1.2	1.85	1.95	2.35
0.240604	0.686795	1.21328	1.6	2.4	2.7	3.35
0.276222	0.809249	1.46147	1.9	2.85	3	3.45
0.325605	0.739099	1.28252	1.7	2.5	2.55	2.9
0.265176	0.55669	0.863009	1.2	1.7	1.85	2.3
0.201321	0.536191	0.841202	1.1	1.5	1.65	2.5
0.264096	0.688817	0.965389	1.2	1.8	2.2	3.3
0.258071	0.746304	1.04942	1.35	2.2	2.65	3.55
0.213725	0.732312	1.18397	1.55	2.4	2.7	3.3
0.214561	0.746296	1.28168	1.65	2.45	2.75	3.15
0.255638	0.806606	1.41178	1.85	2.5	2.75	3.25
0.346337	1.11097	1.94016	2.5	3.1	3.5	4.75
0.438657	1.49369	2.64449	3.25	4.2	4.75	5.7
0.432435	1.36265	2.46089	3.05	4	4.5	4.8
0.350959	1.11925	2.01917	2.6	3.3	3.7	4.35
0.432232	1.55079	2.34054	3.15	3.95	4.05	5
0.672783	1.55759	2.10432	2.95	3.65	3.7	4.4
0.990051	1.20845	1.52459	1.9	2.3	2.45	2.75
0.327641	0.670365	0.838157	1	0.95	0.8	1.2
0.225812	0.427927	0.598854	0.75	1.05	1.2	1.65
0.46797	0.758421	1.04902	1.3	1.85	2.15	2.25
0.621398	1.05358	1.39432	1.75	2.2	2.4	2.5
0.521635	0.943526	1.24019	1.6	2.05	2.4	3.1
0.745763	1.16468	1.59244	2	2.8	3.25	4
0.760786	1.31034	1.79354	2.25	3.1	3.4	3.85
0.589977	1.08877	1.46417	1.95	2.7	3.1	3.55
0.459685	1.00467	1.36378	1.8	2.45	2.95	3.4
0.263173	0.802485	1.15237	1.5	2.05	2.5	2.75
0.213623	0.668527	1.00525	1.3	1.8	2.1	2.55
0.239525	0.812739	1.29452	1.6	2.1	2.45	3.15
0.381345	1.25488	2.18743	2.7	3.4	3.9	4.45
0.596248	1.37737	2.14234	2.65	3.25	3.65	4.05
0.604676	0.987333	1.11385	1.3	1.55	1.8	2.1
0.347597	0.608987	0.645521	0.7	0.95	1	1.45
0.166879	0.446441	0.611042	0.75	1.25	1.3	2.1
0.236321	0.779504	1.15709	1.45	2.25	2.7	3.9
0.338119	1.07578	1.79628	2.25	3.25	3.8	4.85
0.369635	1.22173	1.90283	2.4	3.25	3.5	4.45
0.301772	1.11411	1.59731	2.05	2.65	2.95	4.2
0.277251	0.942478	1.65362	2.15	2.9	3.35	4.25
0.359351	0.924693	1.44752	2	2.75	3.1	4
0.336486	0.938614	1.15274	1.6	2.15	2.6	3.8
0.306453	1.08017	1.60937	2.05	2.85	3.35	4.45
0.402609	1.1726	2.12137	2.75	3.7	4.1	4.85
0.448529	1.25588	2.30812	3.05	3.9	4.55	4.9
0.509856	1.22405	1.9623	2.6	3.35	3.9	4.3
0.653001	1.17069	1.58481	2.1	2.9	3.35	3.95
0.783573	1.32754	1.70043	2.3	3.15	3.75	4.35
0.932861	1.4522	1.96114	2.65	3.55	3.95	4.5
0.820396	1.26023	1.79177	2.4	3.5	3.75	4.05
0.734686	1.19811	1.60556	2.1	3.05	3.4	3.6
0.740682	1.25352	1.68188	2.1	2.95	3.45	3.85
0.601186	1.08791	1.53418	1.95	3	3.5	3.7
0.468525	0.933166	1.38918	1.85	2.65	2.95	3.1
0.262891	0.649137	1.0371	1.4	1.95	2.35	3.05
0.270551	0.832474	1.34963	1.8	2.55	2.9	3.75
0.324989	1.04155	1.74326	2.3	3.05	3.05	3.7
0.297419	0.777019	1.23521	1.65	2.15	2.1	2.4
0.292893	0.55783	0.750245	1	1.3	1.3	1.3
0.174534	0.31148	0.39566	0.5	0.75	0.75	0.75
0.0486227	0.117429	0.179199	0.25	1.1	1.5	2.05
0.12034	0.326284	0.561578	0.75	1.55	1.9	2.65
0.168344	0.523123	0.935172	1.2	2.05	2.5	3.2
0.229678	0.715024	1.20284	1.55	2.5	2.75	3.25
0.224937	0.683114	1.13781	1.55	2.3	2.45	2.95
0.392974	0.836263	1.22497	1.7	2.4	2.7	3.05
0.595968	1.04151	1.47176	2	2.7	2.95	3.25
0.592388	0.973949	1.40704	1.9	2.6	3.1	3.65
0.755998	1.20119	1.61195	2.05	2.85	3.5	4.15
0.795688	1.26439	1.68853	2.15	3.05	3.7	4.2
0.676427	1.18224	1.62461	2.1	3.1	3.8	4.3
0.791041	1.44807	2.05646	2.6	3.6	4.05	4.55
0.935094	1.60512	2.25042	2.95	3.8	4.2	4.5
0.925938	1.40214	1.9225	2.6	3.45	4.1	4.15
0.835893	1.18436	1.60684	2.1	3.05	3.65	3.85
0.805886	1.26569	1.75953	2.25	3.1	3.55	4.4
0.992199	1.61396	2.30004	2.9	4.1	4.85	5.75
1.0085	1.64574	2.29209	2.8	4.15	5.15	6
1.16735	1.78988	2.37144	2.9	4.05	5.2	6.05
1.32296	2.01849	2.6501	3.3	4.6	5.7	6
1.09198	1.76046	2.37606	2.95	4.2	5	5.05
0.937691	1.47094	1.98831	2.5	3.6	4.3	4.55
1.03603	1.50988	1.9732	2.4	3.45	4.05	4.05
1.01134	1.45499	1.88774	2.25	3.05	3.55	3.75
0.953808	1.42384	1.84075	2.25	2.95	3.4	4
1.02754	1.61723	2.13076	2.6	3.4	3.75	4.4
0.952779	1.48217	1.95407	2.45	3.25	3.6	4.2
0.88948	1.34756	1.76289	2.25	2.95	3.2	3.35
0.658332	1.3254	1.98079	2.55	3.05	3.2	3.4
0.44454	1.25505	2.10996	2.65	3.25	3.6	3.9
0.492316	1.19604	1.86529	2.3	3.1	3.55	3.85
0.576583	1.06726	1.53068	2	2.8	3.15	3.55
0.463114	0.910386	1.41112	1.85	2.55	2.9	3.4
0.305957	0.801046	1.36658	1.75	2.35	2.9	3.5
0.447814	0.971801	1.57442	2	2.7	3.4	4
0.78883	1.31493	1.9562	2.5	3.5	4.1	4.3
0.752633	1.18845	1.65173	2.15	3.05	3.4	3.65
0.525749	0.84281	1.14643	1.45	2.1	2.35	3.3
0.595173	0.907842	1.2503	1.55	2.15	2.4	3.2
0.599062	0.911741	1.17297	1.45	1.95	2.05	2.4
0.326781	0.546238	0.719188	0.9	1.4	1.5	1.7
0.253238	0.48248	0.657879	0.85	1.55	1.8	2
0.339283	0.697717	1.04178	1.3	2.3	2.65	3.1
0.291179	0.779324	1.32743	1.7	2.6	2.95	3.35
0.22808	0.677246	1.21703	1.6	2.25	2.5	2.65
0.200913	0.560421	1.00525	1.3	1.8	2.05	2.45
0.171036	0.480709	0.799073	1	1.6	2.15	3.1
0.205172	0.65271	1.16564	1.5	2.25	3	4.15
0.325175	1.04602	1.97572	2.5	3.4	4.1	5.1
0.372787	1.21439	2.23828	2.85	3.95	4.55	5.45
0.390209	1.27078	2.40282	3.1	4.2	4.8	5.35
0.374258	1.206	2.33184	3	3.95	4.6	4.8
0.384451	1.25985	2.38527	3.15	4.35	4.95	5.25
0.48076	1.41281	2.50152	3.3	4.4	4.9	5.2
0.545514	1.17921	1.78442	2.4	2.9	3.2	3.45
0.407637	0.819642	1.17553	1.6	2.1	2.35	2.7
0.271227	0.680826	1.10431	1.45	2.1	2.35	2.55
0.252957	0.643692	1.07914	1.4	2.1	2.35	2.45
0.21682	0.681284	1.14839	1.5	2.15	2.6	3.45
0.301459	0.948625	1.76284	2.3	2.9	3.4	4.35
0.364439	1.11053	2.01597	2.6	3.25	3.6	4
0.375536	1.06327	1.63606	2.1	2.75	3.2	3.65
0.31407	0.842005	1.34037	1.75	2.35	2.75	3.35
0.269406	0.697397	1.21363	1.65	2.4	2.7	3.5
0.589959	1.00186	1.43203	1.95	3	3.5	4.2
0.837253	1.33457	1.80183	2.4	3.35	3.8	4.45
0.687898	1.24583	1.74069	2.25	2.95	3.3	4
0.459241	0.952309	1.39756	1.8	2.6	3	3.6
0.323593	0.89429	1.42015	1.9	2.65	3.05	3.65
0.322269	0.998362	1.82985	2.4	3.3	3.8	4.05
0.375695	1.0494	1.99251	2.6	3.6	3.95	3.85
0.408789	0.928728	1.52031	2.05	2.8	2.95	2.95
0.378783	0.728856	1.05256	1.45	2.05	2.15	2.2
0.265767	0.571174	0.885984	1.15	1.55	1.55	1.7
0.185774	0.478759	0.739687	0.95	1.3	1.35	1.6
0.172457	0.424938	0.629095	0.85	1.25	1.35	1.75
0.310096	0.537872	0.760617	1	1.3	1.4	1.85
0.346682	0.616821	0.804961	1.1	1.35	1.35	1.7
0.225345	0.455199	0.606901	0.85	1.15	1.35	1.6
0.30531	0.513777	0.682527	0.9	1.35	1.75	1.7
0.326004	0.559831	0.747612	1	1.5	1.65	1.55
0.283006	0.523352	0.658773	0.9	1.45	1.8	2.05
0.645224	0.98286	1.28181	1.75	2.75	3.3	3.65
0.943276	1.3308	1.76852	2.4	3.3	3.55	3.75
0.834001	1.21307	1.57012	2.1	2.5	2.5	2.6
0.47884	0.84807	1.16924	1.55	1.85	1.8	1.85
0.171061	0.372581	0.524105	0.7	0.9	1.15	1.8
0.373211	0.606939	0.781863	1.05	1.55	1.85	2.4
0.547824	0.900782	1.1648	1.5	2.2	2.55	2.95
0.401711	0.870508	1.22784	1.6	2.2	2.4	2.7
0.28177	0.615066	0.611731	0.8	1.1	1.05	1.9
0.173137	0.386726	0.471903	0.6	1.15	1.2	1.65
0.0482028	0.0861373	0.114742	0.15	0.65	0.75	0.95
0.0485922	0.133036	0.234862	0.3	0.85	1.1	1.5
0.118901	0.292548	0.504781	0.7	1.1	1.15	1.45
0.134828	0.336446	0.571331	0.8	1.1	1.15	1.35
0.16381	0.415281	0.652208	0.9	1.3	1.4	1.75
0.209589	0.499756	0.765066	1.05	1.5	1.7	2.15
0.277961	0.550953	0.841872	1.1	1.4	1.6	2.1
0.315958	0.525052	0.722993	0.95	1.15	1.3	1.7
0.227552	0.344561	0.426073	0.6	0.9	1.05	1.4
0.107365	0.162161	0.20389	0.25	0.85	1.35	1.75
0.238683	0.402574	0.501697	0.6	1.4	1.9	2.35
0.35945	0.583901	0.703644	0.85	1.5	1.75	1.95
0.395822	0.6697	0.813867	1	1.6	1.75	2
0.50722	0.812352	0.998393	1.25	1.8	2.1	2.3
0.513935	0.772112	0.974631	1.25	1.8	2.2	2.35
0.357365	0.572167	0.737521	1	1.4	1.6	1.85
0.218617	0.340227	0.432264	0.6	1	1.15	1.5
0.152674	0.248201	0.319134	0.4	1.15	1.5	2.2
0.258007	0.501808	0.697861	0.9	1.8	2	2.7
0.283622	0.604274	0.893828	1.15	2.1	2.35	2.95
0.271095	0.636968	0.959548	1.2	1.8	2	2.35
0.213253	0.558577	0.874863	1.1	1.6	1.6	1.9
0.307077	0.597562	0.911526	1.2	1.8	1.75	2.05
0.325596	0.643185	0.948918	1.25	1.75	1.6	1.8
0.195144	0.498249	0.742462	0.95	1.5	1.35	1.8
0.189306	0.540522	0.680446	0.9	1.5	1.55	2.6
0.369007	0.793826	0.827438	1	1.75	2.1	3.25
0.591474	1.14163	1.13178	1.2	2.1	2.75	3.55
0.58155	1.4544	1.62028	1.85	2.55	3.05	3.45
0.520974	1.33978	1.86442	2.25	2.85	3.15	3.15
0.574305	1.22636	1.63568	1.85	2.35	2.65	3.05
0.50726	1.17672	1.24916	1.45	1.95	2.25	2.95
0.330653	0.839453	0.934336	1.3	2.2	2.7	3.55
0.252402	0.738419	1.0727	1.45	2.45	2.95	3.75
0.251697	0.79412	1.28281	1.65	2.45	2.75	3.15
0.252428	0.830442	1.31976	1.7	2.55	2.8	3.3
0.365211	1.03964	1.42279	1.75	2.75	3.05	3.55
0.36481	1.02274	1.28465	1.5	2.55	2.95	3.35
0.221438	0.720578	1.01153	1.25	2.05	2.3	2.8
0.165264	0.518833	0.806367	1.05	1.6	1.65	2.35
0.158472	0.488425	0.715171	0.9	1.45	1.5	2.1
0.237442	0.601863	0.729078	0.9	1.4	1.65	2.3
0.256951	0.65898	0.748201	0.9	1.4	1.75	2.8
0.259065	0.624937	0.718427	0.9	1.4	1.7	2.7
0.805015	1.07661	1.01198	1.05	1.5	2	2.35
0.652521	0.976753	0.941339	1.1	1.6	2.05	2.25
0.617872	1.01093	1.00092	1.15	1.65	1.8	2.05
0.47803	0.749502	0.753206	0.85	1.3	1.45	1.9
0.0512546	0.109923	0.17114	0.2	0.3	0.9	1.6
0.123638	0.279071	0.457981	0.55	0.75	1.1	1.45
0.19838	0.381196	0.520536	0.6	0.85	1.1	1.15
0.170931	0.31467	0.409558	0.5	0.9	1.45	2.45
0.347384	0.598316	0.836171	1.1	1.65	1.95	2.4
0.46592	0.803203	1.15799	1.55	2.2	2.35	2.8
0.4385	0.828423	1.26025	1.7	2.35	2.55	2.8
0.277149	0.599161	0.989025	1.35	1.9	2.1	2.25
0.170748	0.444627	0.714624	0.95	1.35	1.5	2.1
0.107824	0.296312	0.462099	0.6	1.15	1.25	2.3
0.114899	0.356077	0.624716	0.8	1.55	1.85	2.85
0.209064	0.664786	1.13596	1.45	2.05	2.7	3.15
0.263088	0.75003	1.16103	1.5	2.05	2.6	2.8
0.225747	0.628587	0.964885	1.25	1.85	2.15	2.7
0.259452	0.790702	1.27811	1.55	2	2.2	2.95
0.258658	0.799774	1.2918	1.55	2.15	2.6	3.25
0.216824	0.711132	1.24576	1.65	2.45	3.05	3.6
0.275671	0.940882	1.54844	2	2.65	3.15	3.8
0.322487	1.01445	1.51176	1.85	2.3	2.7	3.8
0.338369	1.12992	1.47669	1.85	2.55	3.5	4.8
0.443452	1.33952	1.58281	1.9	3.2	4.6	5.4
0.9466	1.84426	1.91803	2.15	3.35	3.9	4.4
0.194082	0.504449	0.737169	0.95	1.65	2.35	3.75
0.276219	0.791453	1.07507	1.4	2.4	2.95	4.45
0.404606	1.1725	1.35388	1.75	2.9	3.8	5.4
0.508411	1.50361	1.50095	1.9	3.4	4.7	5.9
0.882015	1.99318	1.93114	2.1	3.9	5.25	5.9
1.61675	2.35376	2.45502	2.55	4.1	5.05	5.4
1.87295	2.67432	2.68684	2.8	3.75	4.4	4.7
1.02973	1.90564	1.98083	2.25	2.95	3.6	4.1
0.465892	1.04719	1.48154	2	2.75	3.2	3.5
0.462361	1.13993	1.77742	2.3	3.05	3.1	2.95
0.370948	1.06011	1.45244	1.8	2.4	2.3	2.3
0.251737	0.651564	0.776981	0.95	1.5	1.5	2.05
0.180414	0.510701	0.804103	1	1.7	2.05	2.7
0.266469	0.791143	1.26767	1.6	2.45	2.95	3.35
0.42413	1.00656	1.46248	1.95	2.8	3.15	3.25
0.460308	0.968736	1.37827	1.85	2.55	2.8	2.85
0.454259	0.809204	1.18298	1.55	2.2	2.6	3
0.469529	0.770523	1.04208	1.35	2.1	2.6	3.3
0.573855	1.01103	1.37631	1.8	2.6	3.05	3.55
0.526966	1.12965	1.73217	2.25	3	3.4	3.85
0.513074	1.38953	1.89691	2.35	3.2	3.65	4.15
0.630086	1.6095	1.89337	2.2	3.1	3.4	3.9
0.432119	1.15105	1.46601	1.6	2.25	2.25	3.05
0.281274	0.827219	1.09237	1.25	1.75	1.65	2.6
0.290957	0.703659	0.883103	1.1	1.5	1.45	2.1
0.345196	0.525589	0.623827	0.85	1.35	1.55	2.3
0.574535	0.793844	1.02788	1.35	2.15	2.4	2.5
0.63694	0.938948	1.25234	1.55	2.15	2.35	2.4
0.725626	1.04613	1.49099	1.65	2.05	2.3	2.35
1.07997	1.41747	1.85315	1.95	2.25	2.4	2.45
1.07977	1.39795	1.6925	1.75	2.15	2.25	2.5
1.09351	1.33353	1.97268	1.85	2.6	2.7	2.65
1.04339	1.23804	1.88909	1.8	2	2.05	1.8
0.76169	0.945305	1.18447	1.15	1.4	1.55	1.75
0.0739979	0.0972501	0.111708	0.15	0.7	0.75	0.8
0.234512	0.308678	0.31163	0.4	0.8	0.9	1.1
0.265052	0.355137	0.351713	0.45	0.8	0.8	0.85
0.345002	0.480972	0.443446	0.5	0.95	1	1.2
0.883241	1.22338	1.24794	1.35	1.85	2.05	2.15
0.510518	0.679492	0.7058	0.75	1.4	1.8	2.6
0.830386	1.17915	1.10801	1.3	1.95	2.25	3
1.09793	1.58187	1.43594	1.65	2.35	2.7	3.3
1.13785	1.88333	1.67669	1.85	2.65	3.35	3.6
0.690764	1.56515	1.46419	1.65	2.5	3.25	3.7
0.339741	1.07111	1.21813	1.4	2.25	2.9	3.8
0.240566	0.816988	1.04841	1.3	2.15	2.85	4.15
0.365504	0.963054	1.04947	1.4	2.5	3.7	4.7
0.989747	2.02022	1.82865	2.15	3.35	4.45	4.9
1.12659	2.28339	2.10777	2.35	3.35	4.05	4.65
0.795317	1.59883	1.5886	1.85	2.9	3.95	4.45
1.10787	1.83373	1.69684	1.9	2.85	3.8	4.05
0.945267	1.80469	1.77326	2.1	2.9	3.4	4
0.390741	1.17987	1.43678	1.85	2.65	3.15	4.15
0.306088	1.02314	1.29845	1.65	2.4	3	4.15
0.335219	1.16974	1.38151	1.75	2.75	3.3	4.7
0.431594	1.27063	1.48422	1.8	3	3.65	5.1
0.418344	1.13044	1.39714	1.7	3.05	3.8	4.8
0.272665	0.8272	1.13983	1.45	2.65	3.05	3.95
0.284276	0.800422	1.20171	1.55	2.1	2.1	3.1
0.310135	0.75987	1.11607	1.4	1.75	1.8	2.45
0.242786	0.566757	0.695976	0.85	1.3	1.45	1.85
0.148036	0.41762	0.473156	0.6	1.2	1.5	2.15
0.178624	0.426499	0.604957	0.8	1.55	2.15	2.95
0.749695	1.18926	1.29942	1.55	2.2	2.95	3.5
1.64971	2.24959	2.1796	2.4	3.05	3.75	4.4
2.34988	2.98518	2.86147	3.05	4	4.7	5.35
2.50047	3.00997	2.92267	3.1	4.25	5	5.4
2.3789	2.89595	2.84619	3.1	4.05	4.7	5.15
2.16911	2.83638	2.88442	3.2	4.1	4.65	5.2
1.73278	2.43161	2.6905	3.1	4.15	4.7	5.05
1.79904	2.31185	2.77004	3.2	3.9	4.35	4.5
1.81216	2.34617	2.76306	3.05	3.55	3.9	4.2
1.43236	2.06868	2.54393	2.7	3.25	3.65	4
1.1051	1.47102	1.83058	2	2.4	2.8	2.95
0.738685	1.00488	1.12076	1.3	1.65	2.15	2.25
0.676199	0.944769	1.12773	1.15	1.5	1.95	2.15
0.901752	1.10628	1.23113	1.25	1.7	2.2	2.4
0.965642	1.26356	1.37535	1.45	1.95	2.5	2.7
0.791938	1.23195	1.4102	1.5	2.05	2.4	2.65
0.854061	1.31072	1.42666	1.6	2	2.45	2.9
0.999298	1.42011	1.41499	1.6	2.05	2.65	3.1
0.98348	1.28078	1.25435	1.35	1.85	2.35	2.55
0.747146	0.95317	0.943957	1	1.25	1.55	1.85
0.295097	0.508506	0.58737	0.6	1.1	1.45	1.8
0.301608	0.610503	0.6541	0.75	1.25	1.5	1.7
0.12448	0.317341	0.337249	0.45	1.05	1.1	1.5
0.0963651	0.284669	0.450602	0.55	1.15	1.25	1.95
0.1548	0.45697	0.812473	1.05	1.6	1.7	2.5
0.24104	0.61335	1.0381	1.4	2	2.1	2.8
0.383244	0.832981	1.27364	1.75	2.3	2.4	2.75
0.454671	0.873201	1.33656	1.8	2.4	2.5	3
0.584096	0.920765	1.36557	1.85	2.5	2.75	3.4
0.73588	1.09407	1.54101	2.05	2.65	3	3.15
0.51985	0.880115	1.21834	1.6	2.25	2.5	2.65
0.236653	0.586273	0.839941	1.15	1.75	1.8	2.15
0.190724	0.57885	0.927339	1.25	1.85	2.05	2.4
0.25388	0.75858	1.21383	1.55	2.3	2.85	3.5
0.293774	0.899309	1.41056	1.75	2.5	3.05	3.9
0.327411	0.980561	1.54844	1.95	2.7	3.1	3.85
0.341286	1.07089	1.84399	2.35	3.4	4	4.9
0.392702	1.32759	2.44014	3.1	4.35	5.05	5.7
0.453419	1.38518	2.36634	3.1	4	4.4	4.9
0.483076	1.27385	1.96036	2.6	3.3	3.65	4.1
0.471392	1.21819	1.93071	2.45	3.25	3.65	3.75
0.364349	0.967407	1.52508	1.95	2.65	2.85	3
0.278692	0.718915	1.05932	1.4	1.95	2	2.45
0.261625	0.637895	0.962555	1.25	1.9	2.25	3.05
0.344836	0.973156	1.5316	1.95	2.7	3.25	3.6
0.497582	1.22968	1.84793	2.4	2.95	3.25	3.1
0.451237	0.970773	1.34521	1.8	2.25	2.45	2.55
0.415914	0.782464	0.986974	1.3	1.8	1.9	2.05
0.365762	0.533191	0.612651	0.8	1.25	1.2	1.35
0.0288267	0.0440433	0.0521259	0.05	0.35	0.3	0.55
0.106259	0.119811	0.117483	0.15	0.7	0.95	0.95
0.353262	0.461878	0.550196	0.75	1.15	1.2	1.15
0.0654712	0.0905211	0.113867	0.15	0.5	0.55	1
0.358297	0.489287	0.656596	0.75	1.4	1.35	1.7
0.748249	1.00588	1.27757	1.35	1.8	1.75	2.15
0.722892	1.06308	1.2842	1.35	1.75	1.9	2.45
0.483188	0.815599	0.968411	1.1	1.55	1.7	2.3
0.0392426	0.05367	0.0702525	0.1	0.3	0.4	1.05
0.070326	0.136757	0.209031	0.25	0.6	0.6	0.65
0.10944	0.197643	0.285203	0.35	0.85	0.85	0.95
0.187018	0.260769	0.283246	0.3	0.8	1	1.65
0.303891	0.601718	0.816941	0.95	1.45	1.75	1.75
0.260474	0.765014	1.16369	1.45	1.7	1.75	1.85
0.224419	0.664617	1.10688	1.45	1.95	2.15	2.3
0.211629	0.652819	1.17394	1.55	2.25	2.55	2.9
0.323234	0.99755	1.79373	2.3	3.1	3.5	4.15
0.480971	1.20631	2.07795	2.7	3.5	3.95	4.55
0.688266	1.29367	1.83506	2.45	3.15	3.45	4
0.797057	1.27026	1.65657	2.3	3.05	3.35	3.7
0.580047	1.01958	1.55581	2.15	2.95	3.3	3.45
0.350664	0.778965	1.31299	1.75	2.45	2.8	3.05
0.460671	0.839114	1.19779	1.6	2.25	2.6	3
0.555299	0.957719	1.31842	1.8	2.4	2.7	3.1
0.550149	0.936226	1.24618	1.7	2.15	2.3	2.45
0.511696	0.778766	0.997068	1.35	1.8	1.9	1.85
0.389334	0.595593	0.787617	1.1	1.7	1.8	1.8
0.351141	0.742669	0.974701	1.3	1.95	2.15	2.15
0.308712	0.802348	1.16216	1.5	2	2.1	2.2
0.217793	0.627102	0.988389	1.25	1.65	1.65	2.1
0.235596	0.605159	0.83067	1.05	1.35	1.55	2.15
0.308933	0.65183	0.695452	0.9	1.35	1.75	2.05
0.234523	0.515062	0.588983	0.75	1.35	1.7	1.85
0.135326	0.379975	0.582968	0.75	1.3	1.5	1.8
0.155491	0.416262	0.608353	0.8	1.4	1.65	2
0.187741	0.469671	0.711185	0.95	1.6	2.05	2.55
0.295977	0.69653	1.06652	1.4	2.2	2.65	3.3
0.517241	1.074	1.616	2.1	2.9	3.15	3.75
0.708514	1.27325	1.82272	2.4	3.2	3.5	3.85
0.684676	1.17172	1.66077	2.1	2.8	3	2.95
0.470348	0.79357	1.17916	1.45	2.1	2.05	1.95
0.293946	0.426417	0.578816	0.75	1.45	1.4	1.55
0.0545753	0.170113	0.271396	0.35	1.4	1.7	2.45
0.375406	0.714017	1.0129	1.35	2.25	2.7	3.35
0.619798	0.986115	1.29068	1.75	2.35	2.6	3.15
0.478441	0.780118	1.00344	1.35	2.05	2.25	2.85
0.291172	0.670797	0.984117	1.3	2.05	2.3	2.7
0.216492	0.637468	1.04338	1.35	1.9	2	2.4
0.294007	0.682317	0.949781	1.15	1.6	1.75	2.55
0.38527	0.677172	0.741724	0.85	1.4	1.8	2.5
0.592351	0.921596	0.879135	0.95	1.65	2.2	2.65
0.595491	1.2016	1.22881	1.4	2.35	3	3.7
0.311166	0.922094	1.23767	1.55	2.65	3.15	4.3
0.211229	0.679975	1.13169	1.45	2.35	2.6	4.15
0.203365	0.690864	1.14452	1.45	2.3	2.75	4.05
0.247735	0.841758	1.40493	1.8	2.7	3	3.8
0.26677	0.936273	1.51792	1.95	2.7	2.8	3.75
0.287616	0.967424	1.34672	1.65	2.35	2.95	4.15
0.611129	1.37478	1.46913	1.6	2.5	3.35	4.35
1.10288	2.06497	1.93379	2	2.95	3.55	4.2
0.99483	1.96949	1.84437	1.95	2.75	3.25	3.75
0.422532	1.09474	1.17402	1.35	2.2	2.6	3.4
0.199448	0.659297	1.00101	1.25	2.15	2.55	3.4
0.257399	0.670928	1.12401	1.45	2.1	2.55	3
0.300225	0.654839	0.967649	1.3	1.7	2.1	2.55
0.335295	0.735094	1.10186	1.45	1.85	2.1	2.45
0.32054	0.712539	1.00385	1.35	1.75	1.75	1.8
0.303348	0.558297	0.665181	0.9	1.5	1.45	1.55
0.286489	0.472295	0.660081	0.9	1.5	1.4	1.45
0.191608	0.311315	0.434906	0.6	0.95	0.95	1
0.101315	0.291582	0.388675	0.45	1.15	1.05	1.6
0.133179	0.362969	0.474258	0.55	0.9	0.85	1.2
0.0254328	0.0701196	0.115696	0.15	1.05	1.25	2
0.095653	0.279339	0.461452	0.6	1.35	1.25	1.95
0.14558	0.436396	0.715746	0.9	1.4	1.3	1.8
0.15605	0.458906	0.723878	0.9	1.45	1.25	1.75
0.155963	0.447202	0.707831	0.9	1.4	1.15	1.8
0.190369	0.487704	0.734663	0.95	1.45	1.45	2
0.2812	0.617875	0.937691	1.25	1.75	1.9	2.05
0.304502	0.677118	1.09414	1.4	1.9	2.1	1.95
0.282397	0.617626	0.915183	1.2	1.65	1.8	1.7
0.222364	0.467429	0.606458	0.85	1.1	1.15	1.2
0.0835341	0.194625	0.271591	0.35	0.9	1.05	1.25
0.377929	0.580948	0.745619	0.85	1.45	1.65	1.8
0.542506	0.672837	0.87984	0.95	1.1	1.2	1.5
0.629112	0.807965	1.01798	1	1.15	1.25	1.4
0.398483	0.861775	0.953893	1.15	1.25	1.35	1.3
0.168896	0.480962	0.758684	1.05	1.45	1.65	2.1
0.201243	0.565189	0.953325	1.25	1.8	2	2.3
0.172156	0.479306	0.848248	1.1	1.65	1.75	2.05
0.137466	0.378279	0.611256	0.75	1.25	1.35	1.95
0.1428	0.402522	0.609957	0.8	1.25	1.45	2.6
0.19524	0.525507	0.843265	1.1	1.5	1.75	2.7
0.360154	0.804503	1.10306	1.45	1.95	2.35	2.95
0.357992	0.863934	1.2482	1.55	2.05	2.35	2.75
0.257043	0.651086	1.03109	1.3	1.55	1.55	2
0.200039	0.398491	0.586794	0.8	1.15	1.2	1.5
0.0941982	0.175357	0.249401	0.35	1	1.2	1.55
0.23898	0.398753	0.577056	0.75	1.65	2.2	3.25
0.694981	1.04747	1.51094	1.95	2.95	3.55	4.5
0.751132	1.17674	1.63639	2.2	3	3.25	3.4
0.359841	0.680636	0.96884	1.35	1.8	2	1.95
0.184851	0.390601	0.577214	0.75	1.05	1.25	1.15
0.122038	0.237959	0.304797	0.4	0.85	0.9	0.85
0.0390768	0.127612	0.157281	0.2	0.3	0.3	0.45
0.138375	0.363755	0.427132	0.55	0.8	0.85	1.45
0.203353	0.5215	0.654582	0.8	1.45	1.65	2.6
0.273236	0.727442	0.933314	1.15	1.7	1.85	2.5
0.339427	0.720828	0.786979	1	1.5	1.75	2.4
0.333947	0.732013	0.76649	0.9	1.45	2	2.55
0.18328	0.54256	0.722087	0.85	1.3	1.8	2.4
0.137267	0.363774	0.586668	0.75	1.2	1.5	2.1
0.155336	0.322464	0.488445	0.65	1.15	1.4	1.65
0.157352	0.27427	0.3648	0.5	1	1.05	1.15
0.0826671	0.29201	0.37833	0.45	1.1	1.35	2.5
0.176654	0.558631	0.820808	1.05	1.5	1.8	2.85
0.258793	0.758758	1.13484	1.5	2	2.4	3.25
0.275595	0.836927	1.35006	1.75	2.5	2.9	3.55
0.247126	0.798856	1.43092	1.8	2.7	3.05	3.5
0.239411	0.767176	1.40437	1.75	2.65	3.05	3.35
0.235283	0.731098	1.37492	1.75	2.55	2.95	3.35
0.261021	0.78874	1.34111	1.7	2.55	3.1	3.55
0.345329	0.940542	1.59064	2.05	3	3.8	4.15
0.46749	1.15524	1.73972	2.3	2.9	3.35	3.6
0.428629	0.928169	1.18769	1.55	1.9	2.05	2.4
0.275344	0.529594	0.675652	0.85	1.45	1.8	2.25
0.249756	0.508143	0.676633	0.9	1.75	2.2	2.65
0.327881	0.690979	0.97306	1.3	2.25	2.75	3.25
0.30791	0.738881	1.14375	1.5	2.5	2.85	3.3
0.229746	0.601227	1.04177	1.35	2.1	2.25	2.65
0.20293	0.459225	0.789051	1	1.5	1.65	2.05
0.202665	0.37521	0.555517	0.7	1.2	1.35	1.7
0.255682	0.410283	0.534819	0.65	1.15	1.2	1.4
0.0860126	0.167864	0.223441	0.3	1.05	1.25	1.7
0.21299	0.403694	0.543528	0.7	1.3	1.55	1.95
0.343254	0.58113	0.77271	1	1.5	1.85	2.5
0.456606	0.739732	0.947262	1.3	1.8	2.1	2.55
0.405968	0.671743	0.858925	1.2	1.65	1.85	2.1
0.272783	0.492398	0.648761	0.85	1.25	1.5	1.8
0.187105	0.384681	0.52257	0.65	1.05	1.4	1.75
0.193706	0.373632	0.549983	0.7	1.05	1.35	1.9
0.243259	0.474327	0.655141	0.9	1.2	1.35	2.05
0.209022	0.403954	0.51271	0.75	1.05	1.1	1.7
0.0445535	0.129465	0.198228	0.25	0.75	1	1.5
0.0965865	0.246113	0.340316	0.45	0.95	1.15	1.4
0.154604	0.293934	0.304945	0.4	0.9	1	1.2
0.0249234	0.0734609	0.118645	0.15	0.55	0.85	0.85
0.110761	0.328565	0.438037	0.6	1.15	1.2	1.35
0.193055	0.565196	0.710224	0.95	1.4	1.45	1.95
0.198577	0.607688	0.702241	0.95	1.35	1.7	2.55
0.173153	0.569365	0.679346	0.95	1.6	2	2.8
0.208955	0.644398	0.994134	1.35	2.15	2.15	2.6
0.259957	0.802481	1.30876	1.7	2.45	2.45	2.8
0.260641	0.826161	1.19185	1.45	2.1	2.3	2.85
0.206602	0.654717	0.920826	1.15	1.75	2.25	2.8
0.251308	0.73651	1.21131	1.6	2.25	2.75	2.75
0.380065	0.842356	1.24221	1.6	2.1	2.2	2.15
0.274211	0.493582	0.59766	0.75	1.15	1.2	1.65
0.0380371	0.0793431	0.107264	0.15	0.6	0.8	0.9
0.146901	0.212213	0.285181	0.35	0.85	1.25	1.45
0.25491	0.383012	0.509465	0.65	1.1	1.2	1.35
0.221404	0.317121	0.411484	0.5	0.95	0.75	0.55
0.436236	0.583524	0.696057	0.85	1.45	1.5	1.35
0.391044	0.54135	0.647754	0.8	1.45	1.75	2.05
0.385777	0.603231	0.822124	1.05	2	2.45	2.8
0.579768	0.850857	1.1616	1.5	2.4	2.85	2.85
0.632009	0.939951	1.20049	1.55	2.2	2.7	2.7
0.643805	0.950438	1.21408	1.5	2.1	2.4	2.3
0.092252	0.205595	0.301115	0.4	0.85	1.35	1.4
0.201214	0.476608	0.725616	0.95	1.6	1.9	2
0.216922	0.548425	0.873843	1.2	1.85	1.9	2.05
0.24732	0.528763	0.803167	1.15	1.65	1.7	1.9
0.230661	0.501437	0.746462	1	1.55	1.7	1.9
0.18859	0.499914	0.834219	1.05	1.65	1.8	2.05
0.177364	0.493079	0.847797	1.05	1.5	1.75	2
0.218629	0.539494	0.793778	0.95	1.3	1.45	1.5
0.154072	0.194968	0.226492	0.3	0.6	0.8	1.55
0.403319	0.5003	0.569175	0.75	1.2	1.45	1.7
0.65418	0.803798	0.889871	1.05	1.65	1.9	1.95
0.681874	0.831893	0.949863	1.05	1.75	1.95	2.1
0.524042	0.710703	0.923925	1.05	1.6	1.95	2.35
0.383809	0.621473	0.872355	1	1.35	1.65	2
0.590306	0.886365	1.11041	1.25	1.7	1.75	1.85
0.737735	1.08339	1.35467	1.55	1.95	1.9	2.05
0.555087	0.854353	1.10288	1.25	1.45	1.5	1.85
0.422552	0.703878	0.925468	1.05	1.45	1.55	1.7
0.474884	0.801026	1.01402	1.15	1.55	1.7	1.75
0.454474	0.716831	0.843613	0.95	1.2	1.35	1.45
0.445581	0.524272	0.607217	0.7	0.85	1.25	1.05
0.739957	0.837644	0.912829	1.15	1.4	1.45	1.4
0.178076	0.287729	0.269609	0.35	1.05	1.45	1.45
0.66092	0.916712	0.937513	1.05	1.2	1.2	1.15
0.566505	0.699591	0.782588	0.85	0.95	1.05	1
0.307461	0.409801	0.477492	0.6	0.85	0.95	0.85
0.0542151	0.0852722	0.11765	0.15	0.95	1.55	2.1
0.249386	0.396884	0.469807	0.6	1.25	1.85	2.3
0.379326	0.590484	0.67957	0.85	1.35	1.75	1.95
0.196333	0.295524	0.386631	0.5	1.05	1.6	2
0.259305	0.422257	0.535558	0.7	1.2	1.55	1.65
0.244048	0.384556	0.476658	0.65	1.1	1.35	1.35
0.187264	0.268543	0.328417	0.45	0.85	1	1.15
0.0692318	0.199568	0.246458	0.3	1	1.15	1.4
0.210104	0.465876	0.505519	0.6	1.1	1.15	1.4
0.18848	0.34228	0.362614	0.45	0.7	0.9	1.1
0.0412815	0.13058	0.221183	0.3	1.3	1.7	2.4
0.179809	0.409551	0.614552	0.85	1.75	2.05	2.3
0.317594	0.537559	0.739267	1.1	1.7	1.85	1.8
0.347968	0.528046	0.716182	1.05	1.55	1.55	1.6
0.334086	0.547316	0.752842	0.95	1.45	1.4	1.4
0.467295	0.706966	0.871501	1	1.55	1.65	1.5
0.589522	0.7817	0.915102	1	1.4	1.65	1.8
0.353351	0.519402	0.651922	0.75	0.9	1.2	1.6
0.125721	0.37053	0.516191	0.7	1	1.35	1.7
0.201246	0.694337	1.09863	1.45	2.05	2.45	2.6
0.289199	0.906695	1.4698	1.9	2.45	2.7	2.8
0.238655	0.688044	1.07815	1.4	1.9	2.1	2.5
0.269583	0.772426	0.97435	1.25	1.7	1.9	2.45
0.451485	0.880361	0.92779	1.1	1.45	1.45	1.9
0.374772	0.521408	0.501008	0.55	1	0.95	1.2
0.269192	0.379384	0.356488	0.45	0.95	1	1.1
0.252726	0.470738	0.476133	0.6	1.05	1.15	1.4
0.190465	0.421166	0.433322	0.5	1.05	1.2	1.55
0.473227	0.763953	0.729348	0.7	1.25	1.45	1.6
0.762682	1.10518	1.02444	1	1.35	1.55	1.55
0.134504	0.27909	0.401216	0.55	0.95	1.35	1.6
0.285048	0.521458	0.759417	1	1.65	1.8	1.95
0.311253	0.598371	0.884218	1.15	1.7	1.9	2.25
0.292177	0.551553	0.760837	1	1.35	1.65	2.3
0.387262	0.610279	0.813872	1.1	1.65	2	2.7
0.404593	0.655621	0.884655	1.25	1.85	2.1	2.45
0.269173	0.468159	0.616812	0.85	1.25	1.45	1.7
0.172553	0.293015	0.388649	0.5	0.95	1.15	1.55
0.239298	0.420622	0.556994	0.75	1.35	1.9	2.3
0.418818	0.684466	0.940728	1.25	2.05	2.7	2.85
0.557042	0.91779	1.23489	1.5	2.3	2.7	2.7
0.597213	0.960418	1.23289	1.5	2.25	2.5	2.6
0.560718	0.820159	1.04961	1.4	2.05	2.2	2.5
0.511108	0.768648	0.984408	1.3	1.75	1.9	2.15
0.42695	0.653146	0.846036	1.1	1.55	1.8	1.95
0.390097	0.582693	0.769603	1	1.5	1.85	2.15
0.365957	0.581256	0.762454	1	1.5	1.9	2.45
0.348135	0.645279	0.864441	1.15	1.75	2.3	2.9
0.358834	0.719998	0.953564	1.2	1.85	2.5	2.8
0.354829	0.702609	0.916214	1.1	1.8	2.5	2.8
0.468003	0.804243	1.07291	1.35	1.95	2.6	2.95
0.642605	0.969378	1.26998	1.55	2.05	2.55	2.75
0.595681	0.875818	1.13823	1.35	2	2.25	2.45
0.413146	0.639898	0.851989	1.1	1.7	1.8	2.15
0.272585	0.482023	0.66889	0.9	1.35	1.55	2.05
0.185708	0.407861	0.612443	0.8	1.3	1.45	1.8
0.193842	0.39372	0.591589	0.75	1.3	1.25	1.45
0.165441	0.290189	0.400256	0.5	1	0.95	1.05
0.0582078	0.0883881	0.114581	0.15	0.85	0.95	1.2
0.163853	0.248784	0.328382	0.45	1.15	1.35	1.55
0.343715	0.523013	0.660847	0.85	1.5	1.75	1.9
0.458854	0.695096	0.874209	1	1.55	1.9	2.1
0.484205	0.701818	0.89329	1	1.6	1.85	1.95
0.488819	0.683511	0.881271	1.05	1.6	1.7	1.8
0.381527	0.529395	0.68397	0.85	1.35	1.55	1.65
0.382774	0.55607	0.667631	0.95	1.45	1.65	1.7
0.507396	0.831447	1.00872	1.4	1.95	2.3	3
0.571599	1.02321	1.37832	1.8	2.65	3.4	4.15
0.571617	0.95884	1.40386	1.9	2.85	3.7	3.9
0.616896	0.871109	1.27308	1.8	2.35	2.9	3.1
0.525045	0.769959	1.04516	1.5	1.95	2.1	2.45
0.373443	0.623916	0.794918	1.15	1.75	1.8	2.2
0.390126	0.724576	1.05092	1.4	1.95	2.1	2.2
0.314232	0.698787	1.11143	1.45	1.9	2.2	2.4
0.341006	0.676667	0.968501	1.25	1.75	2.2	2.8
0.447554	0.780877	1.01848	1.3	1.9	2.4	3.05
0.328232	0.656071	0.961978	1.25	2	2.6	3.25
0.241195	0.651203	1.10431	1.45	2.25	2.75	3.15
0.227859	0.66406	1.11211	1.5	2.1	2.45	2.6
0.194804	0.613859	1.00079	1.35	1.95	2.45	2.7
0.25075	0.767922	1.14136	1.5	2.25	2.55	2.75
0.339759	0.810582	0.966728	1.25	1.8	1.85	2.05
0.326768	0.637819	0.618227	0.75	1.05	1.1	1.5
0.211419	0.50639	0.560464	0.7	1	0.95	1.55
0.144179	0.485478	0.712242	0.95	1.35	1.2	2.1
0.464215	0.796503	1.04281	1.35	1.75	1.55	2.2
0.505816	0.840236	0.968307	1.2	1.45	1.3	1.65
0.156032	0.394245	0.472046	0.55	0.8	0.85	1.25
0.0651189	0.0905677	0.112136	0.15	0.95	1.3	1.55
0.143401	0.206868	0.270603	0.35	1.25	1.65	1.9
0.211641	0.338867	0.443372	0.55	1.35	1.65	1.85
0.264763	0.398278	0.476557	0.55	1.05	1.25	1.4
0.324606	0.386458	0.526522	0.6	0.75	0.75	0.55
0.561639	0.701273	0.975463	1.2	1.5	1.45	1.15
0.0964273	0.125429	0.154816	0.2	0.45	0.5	0.6
0.362642	0.487847	0.539629	0.65	1	1.1	1.2
0.38383	0.518021	0.578353	0.65	1.1	1.15	1.15
0.24966	0.41212	0.609951	0.85	1.8	2.3	3.3
0.51971	0.830579	1.19614	1.65	2.55	2.9	2.95
0.551371	0.845815	1.1439	1.5	2.05	2.15	2.2
0.364282	0.606135	0.820942	1.1	1.5	1.45	1.65
0.175154	0.377908	0.588751	0.85	1.25	1.15	1.45
0.125404	0.313118	0.505521	0.7	1	1.1	1.4
0.125055	0.309233	0.475096	0.65	1.15	1.3	1.45
0.155386	0.357713	0.554036	0.75	1.25	1.25	1.4
0.114592	0.264517	0.41053	0.55	0.95	1	1.45
0.0299176	0.0537363	0.0719093	0.1	0.6	0.8	0.95
0.353577	0.516176	0.739125	0.95	1.35	2.05	2.25
0.718519	1.10745	1.50794	1.9	2.6	3.2	3.6
0.796695	1.18764	1.53041	1.85	2.5	3.2	3.45
1.01311	1.4388	1.73747	1.95	2.7	3.3	3.35
1.07755	1.64854	2.13596	2.45	3.4	4.05	4.25
1.37671	1.70922	2.28734	2.7	3.75	4.35	4.6
1.41276	1.54513	1.93389	2.2	3.1	3.4	3.5
0.705189	0.915786	1.20909	1.65	2.35	2.55	3.15
0.583023	0.824889	1.20395	1.85	2.6	3.2	4.05
0.711644	1.05358	1.62831	2.25	3.2	3.9	4.55
0.584445	1.02954	1.67189	2.35	3.3	4.05	4.95
0.640998	1.10365	1.77911	2.6	3.5	4.2	4.85
0.62906	0.972082	1.48301	2.25	3.05	3.45	3.8
0.528404	0.760599	1.04564	1.55	2.2	2.65	3.15
0.569644	0.755895	0.935795	1.35	1.9	2.35	2.85
0.595524	0.722196	0.86081	1.2	1.8	2.4	2.7
0.57067	0.669986	0.850262	1.15	1.7	2.25	2.3
0.560404	0.672109	0.846399	1.2	1.5	1.65	1.8
0.508274	0.641051	0.79904	1.15	1.5	1.65	1.9
0.504931	0.654441	0.814457	1.15	1.75	2.2	2.5
0.536426	0.677345	0.87959	1.25	1.95	2.4	2.75
0.557387	0.71164	1.0323	1.5	2.25	2.65	2.95
0.734527	0.901537	1.25144	1.75	2.3	2.55	2.75
0.713022	0.846	1.10467	1.5	1.9	2.15	2.1
0.583295	0.681773	0.897881	1.2	1.75	2.1	2.1
0.63367	0.736083	0.946749	1.2	1.75	1.9	2.25
0.662467	0.757636	0.943735	1.15	1.6	2	2.55
1.0795	1.09299	1.29427	1.35	1.95	2.5	2.8
1.41095	1.4029	1.72064	1.75	2.45	2.6	2.6
0.964384	1.0354	1.33005	1.5	2	2	2.15
0.447006	0.561256	0.770199	0.95	1.2	1.3	1.45
0.214433	0.313631	0.466508	0.6	0.8	1.05	1.1
0.111385	0.175983	0.250969	0.35	0.8	1.15	1.25
0.131184	0.188574	0.253386	0.35	0.85	1.2	1.35
0.122441	0.172305	0.220886	0.3	0.8	1	1.3
0.0569489	0.0854672	0.108293	0.15	0.6	0.6	0.8
0.537235	0.890519	0.960838	1.2	1.9	2.3	2.7
0.576388	1.00827	1.16504	1.45	1.85	1.8	1.8
0.221114	0.28496	0.304042	0.4	1.25	1.6	2.45
0.316308	0.452581	0.534645	0.75	1.35	1.8	2.05
0.126241	0.20061	0.253917	0.4	1.35	1.75	2.9
0.245152	0.426185	0.542825	0.8	1.8	2.3	3.55
0.279896	0.497324	0.62883	0.85	1.6	2.2	3.4
0.423469	0.541653	0.698533	0.95	1.85	2.35	4.1
0.615495	0.710613	0.855645	1.15	2.25	2.8	4.35
0.729762	0.80408	0.88597	1.15	2.2	2.45	3.8
0.772335	0.855332	0.936673	1.15	2.1	2.05	3.15
0.946414	1.02662	1.30419	1.6	2.25	2.35	3.15
1.24129	1.32349	1.63015	2.1	2.85	3.2	3.5
1.15954	1.31364	1.56258	2.15	2.95	3.35	3.35
0.792781	0.955648	1.19403	1.7	2.4	2.75	2.8
0.630255	0.769494	0.952541	1.35	2.1	2.4	2.6
0.714526	0.87696	1.03042	1.4	2.05	2.25	2.45
0.692619	0.85319	0.921749	1.2	1.7	1.8	2
0.483218	0.592189	0.643381	0.85	1.3	1.5	1.8
0.371378	0.438594	0.497336	0.65	1.15	1.4	1.75
0.268493	0.33084	0.372353	0.5	1	1.25	1.5
0.0864694	0.101142	0.114236	0.15	1.15	1.45	1.55
0.316149	0.384244	0.428496	0.55	1.2	1.35	1.4
0.410855	0.516325	0.577582	0.75	1.05	1.1	1.2
0.345971	0.44066	0.481014	0.65	0.95	1.1	1.55
0.37551	0.47317	0.501693	0.65	1.05	1.3	2
0.421414	0.511847	0.597963	0.75	1.2	1.45	1.9
0.816351	0.996581	0.909983	1.15	2	2.15	3.05
1.11235	1.38464	1.35912	1.75	2.6	2.75	3.9
1.16722	1.48711	1.53709	1.85	2.8	3.55	4.85
1.05853	1.34782	1.51943	1.9	2.95	3.55	4.85
1.45077	1.86477	1.92015	2.3	3.3	3.85	6.1
1.418	1.80966	1.9812	2.45	3.35	3.9	6.25
1.57568	1.95316	2.00476	2.5	3.55	3.85	6.05
1.58462	1.9354	2.09307	2.45	3.65	4.65	6.4
2.00168	2.34828	2.80498	3.55	4.75	5.55	6.4
2.17247	2.45732	2.89487	3.7	4.6	5.2	5.1
1.51249	1.74189	1.95528	2.5	3.05	3.5	3.5
1.15642	1.38283	1.62825	2.05	2.65	2.85	3.05
0.969645	1.16225	1.40965	1.8	2.3	2.6	2.9
0.786786	0.939666	1.15614	1.5	1.95	2.25	2.65
0.700276	0.837575	1.0212	1.3	1.75	1.8	2.05
0.571804	0.692486	0.792876	1	1.4	1.45	1.65
0.416211	0.498334	0.550199	0.7	1.15	1.25	1.6
0.36103	0.420009	0.499535	0.65	1.2	1.4	1.8
0.543096	0.638767	0.76128	1	1.4	1.55	1.9
0.580344	0.685735	0.800073	1.05	1.35	1.4	1.65
0.505152	0.592568	0.671407	0.85	1.3	1.85	2.55
0.572305	0.674175	0.776591	1	1.65	2.25	2.6
0.649702	0.760089	0.887264	1.1	1.85	2.25	2.45
0.766404	0.884833	1.01938	1.25	1.85	2.15	2.4
0.732676	0.86112	0.979823	1.25	1.85	2.1	2.55
0.65917	0.799562	0.926619	1.2	1.95	2.25	2.9
0.723586	0.856972	1.00567	1.3	2.05	2.4	3.05
0.979294	1.12016	1.3401	1.65	2.4	2.65	3.25
1.08388	1.24069	1.51104	1.8	2.45	2.65	3.1
1.07118	1.24174	1.46389	1.8	2.4	2.7	3.1
1.04592	1.20803	1.3982	1.75	2.35	2.75	3.5
1.06893	1.22917	1.50219	1.9	2.6	3	3.65
1.11735	1.30978	1.58048	2	2.65	3.05	3.5
1.02959	1.19003	1.4031	1.75	2.4	2.85	3.1
0.901617	1.0174	1.24322	1.55	2.3	2.7	2.85
0.903722	1.0317	1.26152	1.55	2.25	2.6	2.65
0.976112	1.12784	1.33437	1.65	2.35	2.7	2.5
0.863839	1.0086	1.15494	1.45	2.15	2.55	2.3
0.838003	0.969118	1.10893	1.4	2.05	2.35	2.05
0.877638	1.00556	1.14874	1.45	2	2.05	1.85
0.770891	0.917106	1.00178	1.25	1.65	1.65	1.75
0.310536	0.396763	0.42554	0.6	1	1.05	1.55
0.475569	0.604201	0.681142	0.85	1.2	1.25	1.5
0.592263	0.693186	0.79575	0.85	1.3	1.5	1.8
1.08336	1.05309	1.15931	1.05	1.55	1.8	1.9
1.01712	0.997772	1.15759	1.25	1.9	2.4	2.7
1.0667	1.10541	1.27164	1.4	1.8	1.95	2
0.897644	0.863916	1.11213	1.1	1.7	2.15	3.15
1.29469	1.20305	1.57348	1.65	2.5	2.8	3.05
1.19441	1.12822	1.43731	1.6	2.1	2.15	2.05
0.679713	0.830892	0.848125	0.9	1.3	1.4	2.05
0.608232	0.732386	0.809755	0.9	1.4	1.5	2.15
0.621127	0.772647	0.837668	0.95	1.3	1.4	1.9
0.5096	0.65697	0.680699	0.8	1.05	1.15	1.5
0.277489	0.371812	0.402464	0.5	0.95	1.15	1.55
0.580043	0.696714	0.783123	0.85	1.6	2.05	2.55
1.1927	1.43779	1.70106	1.85	2.7	3.25	3.65
1.35084	1.63759	2.07404	2.3	3.35	3.8	3.8
1.23127	1.49731	1.95618	2.2	3.15	3.3	3.15
1.03698	1.26763	1.48081	1.7	2.15	2.2	2.35
0.802234	0.943297	1.02096	1.15	1.45	1.65	1.85
0.9696	1.12267	1.28184	1.5	2.25	2.4	2.55
0.994271	1.17736	1.49828	1.85	2.7	3.1	3.5
0.978358	1.16563	1.54995	1.9	2.55	2.8	3.05
0.723401	0.852316	1.07979	1.35	1.85	2.1	2.4
0.664318	0.773274	0.916867	1.15	1.65	2.05	2.35
0.863018	0.98199	1.14468	1.45	2.15	2.45	2.5
0.930942	1.12932	1.2708	1.65	2.25	2.4	2.35
0.727064	0.965888	0.984386	1.25	1.55	1.65	1.85
0.430745	0.559368	0.5209	0.6	0.9	1	1.25
0.542006	0.527332	0.622452	0.65	0.75	0.9	1
0.878378	0.954648	1.07053	1.2	1.45	1.95	2.5
0.901139	1.0838	1.20327	1.4	1.85	2.35	3.25
1.00922	1.13792	1.32626	1.55	2.2	2.85	3.85
1.13222	1.22342	1.52066	1.9	2.65	3.45	4.05
1.10589	1.23272	1.56989	1.95	2.55	2.95	3.15
0.807843	0.940843	1.14928	1.4	1.95	2.05	2.3
0.757435	0.907244	1.1004	1.25	2.05	2.7	3.6
1.21869	1.46066	1.84566	2.05	3.2	4.05	4.55
1.48494	1.83712	2.24871	2.5	3.7	4.2	4.35
1.31676	1.56701	1.8797	2.15	3.1	3.3	3.6
0.99468	1.13596	1.37926	1.65	2.15	2.4	2.85
0.712872	0.833146	1.07616	1.25	1.6	1.95	2.25
0.53946	0.666309	0.785303	0.95	1.4	1.6	1.8
0.478475	0.62436	0.601004	0.8	1.15	1.2	1.3
0.195115	0.241937	0.292748	0.4	0.55	0.5	0.7
0.153115	0.17957	0.212016	0.25	1.1	1.35	1.6
0.372166	0.44282	0.532937	0.65	1.35	1.5	1.7
0.455505	0.554654	0.635487	0.8	1.3	1.5	1.75
0.170713	0.205989	0.231899	0.3	1.05	1.4	1.7
0.289454	0.349408	0.389127	0.5	1.3	1.65	1.9
0.863586	1.03412	1.1919	1.5	2.4	2.85	3.1
1.24365	1.57681	1.827	2.3	2.95	3.35	3.7
0.918574	1.18185	1.42622	1.8	2.2	2.45	3.05
0.88209	1.0578	1.28538	1.6	2.1	2.4	2.9
0.989248	1.1889	1.36251	1.75	2.3	2.8	2.9
0.814868	0.971245	1.11692	1.5	2.05	2.55	2.6
0.756627	0.900044	1.07188	1.45	2	2.45	2.6
0.744121	0.899436	1.06429	1.4	2	2.35	2.65
0.725911	0.87178	1.04242	1.3	1.95	2.4	2.8
0.99951	1.15934	1.37854	1.7	2.4	2.8	3.1
1.03203	1.18029	1.39563	1.75	2.55	2.7	2.8
0.811539	0.916253	1.12324	1.45	2.3	2.45	2.45
0.737273	0.838832	1.11222	1.4	2.25	2.35	2.4
0.594937	0.711804	0.927804	1.15	1.8	1.9	2.25
1.30304	1.54417	1.44571	1.65	2.15	2.5	2.9
0.806225	0.976775	1.00216	1.3	1.9	2	2.45
0.602698	0.742431	0.728715	0.95	1.35	1.35	1.95
0.487955	0.611282	0.660817	0.85	1.45	1.7	2.5
0.717565	0.860766	0.932509	1.1	1.8	2.05	2.9
0.689817	0.838485	0.8649	1	1.55	1.6	2.05
0.326628	0.40617	0.455764	0.55	1.1	1.2	1.45
0.256005	0.312141	0.361068	0.45	1.05	1.35	1.8
0.545809	0.614185	0.576126	0.7	1.4	1.55	2.1
0.552557	0.702076	0.809225	1.05	1.95	2.3	2.95
0.825947	0.991858	1.10974	1.35	2.25	2.3	2.5
0.750675	0.901694	0.731672	0.85	1.35	1.4	1.55
0.266067	0.313917	0.330569	0.3	0.6	0.65	0.5
0.235983	0.294503	0.332644	0.4	0.5	1.3	1.45
0.511807	0.605345	0.716542	0.85	1.35	1.9	2.25
0.792799	0.880416	1.09621	1.3	1.95	2.2	2.3
0.810606	0.950826	1.18943	1.35	1.85	1.7	1.7
0.737112	0.895601	1.12664	1.2	1.75	1.8	2.1
1.07542	1.22048	1.50793	1.55	2.4	2.85	3.2
0.846694	0.814751	0.89632	1.15	1.25	1.25	1.25
0.589219	0.586416	0.686191	0.7	0.8	0.95	1.05
1.08246	1.01341	1.27619	1.45	2.1	2.85	3.35
1.4804	1.38069	1.71851	1.8	2.3	2.55	2.2
1.16098	1.08611	1.34815	1.5	1.95	2.1	2
0.957721	0.9191	1.17911	1.45	1.95	2.05	2.05
1.01327	0.963511	1.25485	1.55	1.95	2.05	2.25
0.831159	0.795685	1.0498	1.3	1.65	1.75	2
0.661684	0.663713	0.83885	1	1.45	1.5	1.6
0.587327	0.611808	0.704609	0.85	1.15	1.15	1.35
0.40143	0.411476	0.477671	0.6	0.8	0.85	1.15
0.396538	0.381308	0.46246	0.55	1.1	1.3	1.4
0.718555	0.772224	0.921054	1.1	1.75	2	1.95
0.762168	0.89876	1.09642	1.25	1.9	2.3	2.3
0.71994	0.877086	1.0752	1.1	1.85	2.2	2.3
0.978695	1.12882	1.26235	1.2	1.8	1.9	2.05
1.03634	1.1246	1.2461	1.15	1.55	1.6	1.65
0.736509	0.767177	0.888743	0.95	1.2	1.2	1.2
0.410378	0.434837	0.501342	0.65	0.8	0.85	0.9
0.268195	0.304843	0.339988	0.4	0.6	0.65	0.8
0.231479	0.268817	0.28046	0.3	0.85	1.2	1.4
0.157126	0.158181	0.207447	0.25	0.55	1.05	1
0.484315	0.476498	0.622709	0.75	1.15	1.35	1.2
0.623493	0.625322	0.798389	1	1.25	1.35	1.2
0.521529	0.54786	0.720289	0.95	1.1	1.15	1.05
0.349483	0.37577	0.488214	0.65	0.85	1	0.95
0.312761	0.312429	0.37354	0.45	0.95	1.05	0.95
0.431623	0.439408	0.527961	0.65	0.95	1.05	0.95
0.379514	0.463161	0.541997	0.55	1.1	1.45	1.8
0.518037	0.634925	0.77082	0.8	1.1	1.4	1.9
0.416514	0.509858	0.60978	0.7	1	1.55	1.95
0.337573	0.400954	0.472777	0.6	1.1	1.65	1.85
0.420377	0.489159	0.531238	0.7	1.2	1.5	1.8
0.117564	0.143753	0.163497	0.2	0.65	1.1	1.45
0.167564	0.204645	0.242426	0.3	0.75	1.05	1.35
0.241663	0.29633	0.33749	0.4	1.1	1.45	1.75
0.365573	0.456029	0.528194	0.65	1.2	1.45	1.55
0.202375	0.252496	0.299026	0.4	0.95	1.15	1.25
0.139584	0.165404	0.194694	0.25	0.75	1.25	1.35
0.266257	0.310998	0.357007	0.45	1.1	1.4	1.55
0.357448	0.423777	0.480207	0.6	1.05	1.3	1.5
0.39741	0.478879	0.562313	0.7	1.05	1.3	1.65
0.475105	0.555556	0.662039	0.8	1.1	1.3	1.6
0.356887	0.412241	0.490149	0.6	0.85	1	1.35
0.282745	0.341228	0.400587	0.5	0.95	1.45	1.9
0.724234	0.890944	0.959407	1.2	1.8	2.2	2.95
0.965329	1.13024	1.28448	1.6	2.35	2.65	2.9
0.928958	1.09051	1.1681	1.4	1.9	1.95	2
0.598862	0.722805	0.719977	0.85	1	1.05	1.1
0.345436	0.414318	0.470686	0.6	1.3	1.6	2.35
0.631069	0.750807	0.860882	1.1	1.65	1.95	2.6
0.51551	0.609458	0.720812	0.95	1.5	1.8	2.4
0.423392	0.516785	0.606389	0.85	1.35	1.35	1.85
0.617663	0.728751	0.82712	1.05	1.8	2.15	3.3
0.870184	1.11692	1.2198	1.55	2.1	2.45	3.5
0.746594	0.882661	1.02463	1.25	1.55	1.7	2.7
0.555005	0.665926	0.763199	0.95	1.45	1.6	2.2
0.560455	0.673321	0.760604	1	1.55	1.7	1.95
0.601149	0.717549	0.816511	1.1	1.7	1.9	2.2
0.656165	0.785108	0.908677	1.15	1.8	2	2.3
0.654898	0.78729	0.915226	1.15	1.6	1.9	2.25
0.597557	0.717937	0.82161	1.05	1.45	1.85	2.1
0.541059	0.65057	0.748851	0.9	1.35	1.6	1.65
0.443168	0.518258	0.627494	0.75	0.95	1.2	1.4
0.287867	0.336978	0.412961	0.5	0.8	1.2	1.5
0.247804	0.337147	0.358696	0.45	0.85	1.35	1.65
0.6921	1.10319	2.08347	2.65	3.8	4.85	5.75
0.415813	1.13178	2.36193	3.05	4.15	5.1	6.05
0.399419	1.09676	2.3198	3	4.1	5	5.75
0.429254	1.04722	2.13321	2.8	3.85	4.7	5.25
0.415244	1.09362	2.27769	2.95	4	5	5.45
0.359537	1.02272	2.30354	2.9	3.95	5.2	6.15
0.489841	0.973817	2.25674	2.85	4.05	5.2	6.15
[truncated: 13,181 more rows]

## Sheet: sodalakesmooth
1.00744	1.54781	1.57689	1.9	2.5	2.95	3.15
1.05705	1.72658	1.71916	2.05	2.75	3.15	2.8
1.06197	1.63479	1.57004	1.7	2.45	2.8	2.8
1.3862	2.13305	1.74333	1.85	2.65	2.65	2.9
1.07543	1.72834	1.62004	1.75	2.4	2.45	2.75
0.8653	1.451	1.46744	1.75	2.15	2.45	2.8
1.04143	1.43969	1.38002	1.65	2.2	2.5	2.75
0.975167	1.23438	1.13098	1.4	2.2	2.45	2.55
0.70512	1.01518	0.992803	1.35	2.05	2.2	2.3
0.708784	1.05872	1.04255	1.4	1.95	2.05	2.15
0.638596	0.901033	0.917751	1.3	1.85	1.95	1.9
0.530675	0.780558	0.822316	1.15	1.7	1.8	1.9
0.401419	0.662082	0.777736	1	1.55	1.8	2.3
0.382204	0.658565	0.837261	1.05	1.55	1.85	2.35
0.529035	0.829388	0.996099	1.3	1.85	2.05	2.25
0.586663	0.905344	1.07825	1.4	1.95	2.15	2.25
0.466633	0.789801	0.947479	1.15	1.6	1.7	2
0.297841	0.523051	0.65066	0.8	1.4	1.6	2
0.298998	0.478492	0.603132	0.8	1.5	1.8	2.05
0.266886	0.446393	0.585298	0.8	1.45	1.6	1.6
0.154127	0.299079	0.410672	0.55	1.1	1.2	1.25
0.0842726	0.122847	0.16008	0.2	0.9	1.1	1.25
0.209942	0.302278	0.383186	0.5	1	1	1
0.25212	0.341955	0.424473	0.5	0.95	0.85	1.05
0.358572	0.46928	0.499849	0.55	1.05	1.15	1.4
0.356003	0.49265	0.553679	0.65	1.15	1.55	1.6
0.280753	0.40848	0.591526	0.7	1.2	1.6	1.7
0.231508	0.354922	0.518137	0.6	1	1.2	1.5
0.189585	0.22723	0.257806	0.25	0.8	1.25	1.65
0.519093	0.601885	0.71992	0.7	1.3	1.8	2.05
1.53748	1.71096	1.9344	2.2	3	3.65	4.2
0.926096	1.43698	2.00021	2.6	3.35	3.9	4.3
0.644286	1.33761	1.99793	2.75	3.6	4.25	4.75
0.754244	1.56506	2.32906	3	4	4.8	5.1
0.84755	1.76894	2.52987	3.2	4.3	5.1	5.25
0.740075	1.65867	2.33445	2.9	3.95	4.7	4.95
0.671891	1.53401	2.16953	2.65	3.5	4.1	4.55
0.654118	1.37964	1.94927	2.45	3.3	3.75	4.05
0.548414	1.11391	1.59387	2.05	2.8	3.4	3.85
0.545773	1.0869	1.53521	2.05	2.65	3.4	4.1
0.848518	1.38839	1.69708	2.3	2.85	3.5	4.2
1.09825	1.71484	2.04004	2.6	3.5	4	4.5
1.38057	2.14547	2.581	3.1	4.15	4.7	5.1
1.34249	2.13099	2.60261	3.15	4.1	4.85	5.4
0.879337	1.71225	2.29069	2.85	3.85	4.5	5
0.675069	1.46776	1.97175	2.5	3.45	4	4.4
0.578894	1.28895	1.73049	2.3	3.25	3.8	4.2
0.540227	1.24427	1.69175	2.25	3.15	3.6	4.35
0.521371	1.16701	1.60438	2.1	2.85	3.35	4.25
0.559712	1.23699	1.74433	2.25	2.95	3.55	4.15
0.585824	1.27142	1.78209	2.25	2.95	3.65	4.4
0.681693	1.41216	1.95687	2.55	3.55	4.45	5.1
0.810621	1.66141	2.32676	3.05	4	4.9	5.35
0.827072	1.75776	2.49092	3.2	4.25	5.15	5.7
0.830271	1.78429	2.51165	3.2	4.5	5.35	5.75
0.724094	1.60189	2.26516	2.95	4	4.6	5
0.649969	1.49548	2.07273	2.7	3.75	4.15	4.6
0.68706	1.43186	1.90361	2.4	3.4	3.9	4.25
0.677083	1.34388	1.77839	2.25	3.3	3.9	4.2
0.666258	1.32943	1.73854	2.25	3.3	3.8	4.2
0.680442	1.34829	1.73716	2.2	3	3.55	4.1
0.716725	1.34719	1.75198	2.15	3.1	3.7	4.45
0.733768	1.32029	1.77963	2.25	3.45	3.9	4.55
0.684657	1.38147	1.90601	2.45	3.55	4.05	4.4
0.643087	1.40617	1.98052	2.55	3.7	4.4	4.55
0.528384	1.25609	1.8436	2.45	3.65	4.35	4.45
0.446049	1.10054	1.6286	2.25	3.3	3.95	4.25
0.437154	0.991569	1.46328	1.95	2.95	3.55	4.05
0.416742	0.9393	1.37702	1.75	2.8	3.35	4.05
0.46967	1.14241	1.63245	2.15	3.2	3.9	4.65
0.495791	1.22778	1.76626	2.4	3.45	4.25	4.85
0.505523	1.1601	1.69064	2.25	3.15	3.85	4.45
0.552703	1.19135	1.77388	2.35	3.1	3.6	4.15
0.50823	1.09361	1.62732	2.2	2.95	3.35	3.95
0.435151	0.997416	1.38549	1.9	2.7	3.25	3.75
0.418036	1.00503	1.33424	1.75	2.55	3.15	3.45
0.438944	0.987333	1.31339	1.65	2.3	2.9	3.45
0.507189	1.04366	1.37575	1.75	2.55	3.15	3.8
0.578506	1.17443	1.54463	1.95	2.95	3.5	3.95
0.744878	1.45028	1.94501	2.45	3.55	4.3	4.8
0.83174	1.68326	2.28038	2.9	4.1	5	5.6
0.825186	1.64749	2.17573	2.8	3.95	4.75	5.05
0.865531	1.49957	1.98772	2.55	3.4	4.15	4.4
0.813637	1.39016	1.85516	2.4	3	3.6	4.15
0.794474	1.31113	1.73459	2.25	2.9	3.55	4.1
0.854522	1.29041	1.69107	2.2	2.85	3.45	3.95
0.845369	1.25947	1.63075	2.15	2.9	3.4	3.75
0.712682	1.1523	1.51405	2	2.85	3.25	3.35
0.593653	1.08161	1.43473	1.8	2.65	2.95	3.05
0.625023	1.17216	1.53578	1.85	2.75	3.1	3.4
0.629239	1.14597	1.50941	1.85	2.6	3	3.6
0.697601	1.16228	1.56087	1.95	2.5	3.15	3.65
0.671384	1.24367	1.72451	2.15	2.95	3.8	4.05
0.48449	1.1345	1.67158	2.15	3.2	3.8	4
0.40562	0.972874	1.42557	1.9	2.75	3.1	3.3
0.358603	0.83401	1.15197	1.45	2.05	2.65	2.9
0.340504	0.810917	1.12443	1.4	2.05	2.6	2.95
0.345523	0.817625	1.20068	1.55	2.35	2.75	3
0.426275	0.975767	1.37033	1.75	2.5	2.8	2.95
0.550481	1.08923	1.48034	1.9	2.45	2.7	3.1
0.589652	1.05938	1.43411	1.8	2.35	2.65	3.05
0.710421	1.15451	1.53593	1.9	2.55	2.8	3.25
0.877029	1.31365	1.75126	2.25	2.9	3.25	3.8
0.903006	1.38146	1.79081	2.25	2.9	3.4	3.8
0.749439	1.09656	1.46371	1.8	2.5	3.1	3.5
0.544791	0.74591	1.03948	1.35	2.15	2.45	2.85
0.44907	0.709839	0.897218	1.15	2.05	2.15	2.55
0.42345	0.746471	0.936854	1.15	1.95	2.15	2.6
0.404511	0.691601	0.892862	1.1	1.8	2.1	2.9
0.515371	0.758864	1.03742	1.3	2.05	2.4	3.25
0.616737	0.874276	1.19506	1.5	2.25	2.55	3
0.528136	0.923147	1.16171	1.45	2.15	2.5	2.85
0.513282	1.04068	1.27297	1.6	2.45	3	3.55
0.685439	1.34914	1.71228	2.15	3.3	4.05	4.95
0.956287	1.69435	2.28547	2.8	3.95	4.8	5.45
1.08345	1.63858	2.28891	2.85	4	4.75	4.8
0.963814	1.36207	1.88973	2.4	3.45	3.95	4.1
0.807411	1.17137	1.60816	2	3.1	3.6	3.95
0.692421	1.03151	1.39493	1.75	2.95	3.35	3.6
0.6597	1.01766	1.32771	1.7	2.7	3.1	3.45
0.755704	1.15237	1.52478	1.9	2.9	3.65	3.95
0.787196	1.27191	1.71184	2.05	3.1	3.85	4.25
0.741251	1.47152	1.99572	2.45	3.45	3.95	4.6
0.727869	1.56897	2.16997	2.75	3.7	4.35	5
0.786518	1.66382	2.30476	3	3.95	4.65	5.1
0.720795	1.5962	2.27601	2.95	3.8	4.3	4.7
0.595098	1.28723	1.84192	2.3	3.15	3.65	4.5
0.669304	1.4519	2.05604	2.6	3.55	4	4.65
0.664627	1.49122	2.11742	2.7	3.5	3.95	4.45
0.527162	1.19676	1.61967	2.05	2.75	3.35	4.05
0.541989	1.17721	1.5888	2	2.8	3.25	3.85
0.556039	1.19703	1.60654	2.05	2.95	3.4	3.75
0.54748	1.15276	1.5366	1.95	2.85	3.4	3.4
0.530104	1.07074	1.40097	1.75	2.4	2.9	3
0.370984	0.816777	1.0439	1.3	1.85	2.3	2.7
0.274322	0.682009	0.938897	1.15	1.85	2.05	2.45
0.378305	0.715368	1.05667	1.3	2.05	2.25	2.6
0.443549	0.818185	1.14805	1.45	2.2	2.3	2.4
0.373956	0.787265	1.02065	1.35	1.85	1.75	1.75
0.297834	0.555921	0.713951	0.95	1.15	1.1	1.4
0.257913	0.461435	0.609348	0.75	1.05	1	1.3
0.360079	0.527966	0.678261	0.75	1.2	1.15	1.35
0.103867	0.171839	0.194979	0.25	0.5	0.3	0.75
0.129978	0.208639	0.235491	0.3	0.9	0.85	0.8
0.129381	0.257653	0.330639	0.4	0.85	0.85	0.9
0.0934787	0.166862	0.235153	0.3	0.9	1.1	1.65
0.310053	0.499846	0.700823	0.9	1.5	1.75	2.2
0.468097	0.729697	0.997488	1.25	2	2.25	2.75
0.474685	0.836356	1.05377	1.3	2.05	2.35	2.9
0.41221	0.7115	0.879127	1.1	1.9	2.25	2.55
0.514427	0.723355	0.977931	1.1	2.05	2.4	2.6
0.728493	1.05593	1.39218	1.45	2.3	2.8	3
0.927942	1.38382	1.75319	1.75	2.4	2.8	2.9
1.27519	1.56274	2.01348	1.95	2.35	2.35	2.15
0.654796	0.889413	1.17302	1.25	1.6	1.7	1.7
0.386529	0.519367	0.678747	0.8	1.15	1.4	1.5
0.402006	0.622367	0.67319	0.75	1.15	1.4	1.45
0.473117	0.720929	0.825297	0.8	1.2	1.4	1.5
0.52502	0.731195	0.849124	0.8	1.25	1.45	1.6
0.422435	0.637144	0.74515	0.8	1.35	1.65	1.65
0.491432	0.797771	1.02445	1	1.65	1.9	1.7
0.058229	0.0873898	0.0963727	0.1	0.65	0.7	0.75
0.308185	0.374487	0.472008	0.5	1.05	1.2	1.1
0.438133	0.615652	0.781725	0.75	0.95	1.05	1
0.260022	0.42859	0.549606	0.5	0.65	0.65	0.65
0.130616	0.201516	0.265189	0.3	0.65	1.05	1.15
0.341129	0.547189	0.697834	0.75	1.1	1.4	1.4
0.472487	0.747361	0.91552	1	1.25	1.45	1.4
0.560861	0.779248	1.0307	1.05	1.4	1.55	1.5
0.893167	1.10408	1.30569	1.25	1.4	1.5	1.6
0.782473	1.02909	1.15142	1.15	1.4	1.45	1.75
0.773128	1.04109	1.31277	1.25	1.6	1.65	2
0.804295	1.07267	1.31965	1.25	1.7	2	2.3
0.935458	1.21579	1.45278	1.35	1.9	2.4	2.8
1.05975	1.44802	1.70951	1.6	2.1	2.45	2.75
0.902784	1.30537	1.59948	1.6	2.1	2.4	2.6
0.909619	1.28488	1.68415	1.7	2.25	2.6	2.7
1.05259	1.5047	1.92803	1.85	2.3	2.5	2.65
1.15941	1.62187	2.10562	1.95	2.65	3.05	3.2
1.44205	1.75379	2.41492	2.2	2.9	3.6	3.75
1.58239	1.90636	2.58164	2.4	3	3.85	4.35
1.89246	2.5941	3.46137	3.1	4.1	4.7	5.05
2.08971	2.61582	3.573	3.3	4.4	4.65	4.7
1.73694	2.09464	2.82348	2.8	3.7	4.15	4.35
1.17455	1.66468	2.26879	2.35	3.15	3.55	3.8
0.71578	1.01614	1.43207	1.75	2.55	2.75	2.8
0.644525	0.901379	1.23646	1.45	2.1	2.4	2.3
0.5723	0.812139	1.05886	1.1	1.55	1.8	1.85
0.567445	0.767983	0.905447	0.95	1.55	1.75	1.95
0.956757	1.25653	1.39108	1.45	2.1	2.3	2.25
1.11596	1.37914	1.52515	1.6	2.05	2.25	2.05
0.172823	0.330435	0.398099	0.5	0.95	1	0.85
0.218724	0.420498	0.531642	0.7	1.15	1.4	1.5
0.168065	0.349457	0.499104	0.75	1.35	1.7	1.75
0.19868	0.402577	0.577846	0.8	1.3	1.5	1.3
0.0269624	0.0533935	0.0727953	0.1	0.8	1	1.2
0.132759	0.287463	0.414145	0.55	1.35	1.6	1.9
0.296854	0.617732	0.837396	1.1	1.9	2	2.35
0.609082	1.06739	1.33618	1.7	2.65	2.85	3.2
0.700201	1.19051	1.56905	1.95	2.85	3.25	3.55
0.587201	0.935571	1.32267	1.65	2.2	2.5	2.9
0.539909	0.767764	1.04495	1.3	1.9	2.25	2.9
0.580225	0.80178	1.10785	1.35	2.15	2.65	3.2
0.614647	0.846589	1.16685	1.4	2.4	2.7	2.85
0.501983	0.734225	1.0081	1.25	2.25	2.45	2.55
0.527521	0.795155	1.06001	1.3	2	2.3	2.55
0.680041	0.974477	1.26558	1.4	2.15	2.55	2.85
0.945657	1.37611	1.94255	2.1	3.1	3.5	3.95
1.02937	1.51816	2.14343	2.45	3.6	3.95	4.55
1.03076	1.4377	2.06795	2.45	3.55	4	4.45
1.0772	1.56765	2.30072	2.55	3.45	3.85	4
1.19962	1.77584	2.35405	2.3	3.05	3.4	3.6
1.21328	1.82877	2.32932	2.1	2.85	3.25	3.6
0.865571	1.31018	1.72289	1.7	2.55	2.95	3.35
0.604416	0.889817	1.1829	1.4	2.45	2.9	3.5
0.620485	0.930314	1.21329	1.55	2.5	2.9	3.7
0.669872	0.992875	1.29293	1.7	2.35	2.85	3.55
0.662509	1.0437	1.37912	1.75	2.4	2.9	3.2
0.59291	1.02054	1.32382	1.65	2.35	2.55	2.9
0.571208	1.07281	1.37453	1.75	2.55	2.75	3.35
0.901503	1.23874	1.45834	1.85	2.7	2.95	3.4
1.46635	1.48201	1.58464	1.65	2.4	2.7	2.8
1.07527	1.18992	1.37459	1.7	2.35	2.75	3.3
0.97199	1.15145	1.35942	1.7	2.6	3.1	3.8
0.952982	1.19918	1.40354	1.7	2.7	3.25	3.8
1.13199	1.39091	1.67016	2.05	2.9	3.3	3.9
1.15542	1.40728	1.63759	2.1	2.95	3.4	4.05
1.13267	1.45223	1.72933	2.2	3.05	3.45	4.5
1.24093	1.61938	2.06223	2.6	3.65	4.05	5.1
1.26326	1.60831	2.0933	2.7	3.9	4.55	5.35
1.17536	1.48673	1.97041	2.55	3.85	4.55	5.2
1.21144	1.47966	1.87129	2.35	3.55	4.15	4.7
1.25196	1.44832	1.75867	2.2	3.2	3.75	4.4
1.3168	1.54638	1.93716	2.45	3.6	4.1	4.5
1.17558	1.43439	1.81043	2.3	3.4	3.85	4.35
0.911095	1.12205	1.40067	1.8	2.8	3.2	3.9
0.887353	1.06406	1.34085	1.7	2.85	3.3	3.9
1.08452	1.23241	1.52756	1.9	3.2	3.75	4.25
1.28377	1.47234	1.81171	2.25	3.3	4.05	4.45
1.21636	1.54257	1.91209	2.35	3.15	4	4.5
1.05422	1.35214	1.74701	2.15	3	3.65	4.2
0.963179	1.2204	1.61847	2	2.85	3.45	4.1
0.965589	1.24473	1.67046	2.05	2.95	3.65	4.25
0.984463	1.26409	1.71324	2.15	3.15	3.85	4.05
0.925249	1.23152	1.69047	2.15	3.15	3.7	3.85
0.92848	1.2652	1.63945	2.05	3	3.5	4
0.965462	1.41479	1.70731	2.2	3.1	3.65	4.2
0.943865	1.36769	1.67446	2.2	3.05	3.5	3.85
0.854889	1.17309	1.49273	1.9	2.8	3.2	3.5
0.786596	1.10925	1.44034	1.85	2.7	3	3.25
0.877304	1.18034	1.41158	1.85	2.55	2.75	3.15
1.05551	1.29102	1.46195	1.9	2.5	2.75	3.4
0.949116	1.14352	1.30461	1.7	2.35	2.85	3.6
0.888492	1.08143	1.25735	1.6	2.5	3.15	3.75
0.962701	1.18659	1.41518	1.75	2.65	3.1	3.55
0.874832	1.08525	1.31545	1.65	2.4	2.75	3.25
0.85966	1.03462	1.25132	1.55	2.25	2.6	3
0.803067	0.97523	1.15518	1.4	2.05	2.45	2.7
0.761853	0.961722	1.12478	1.45	2.15	2.45	2.5
0.806385	0.987397	1.14336	1.45	2.05	2.25	2.3
0.706874	0.847207	0.960237	1.15	1.6	1.85	2.15
0.582236	0.705781	0.826571	1	1.65	1.75	2.05
0.616819	0.719413	0.910032	1.15	1.95	2.1	2.2
0.705447	0.867034	1.04933	1.35	2.3	2.7	2.7
1.0369	1.27844	1.53122	1.9	3.1	3.4	3.35
1.26637	1.54958	1.79143	2.2	3.25	3.4	3.45
1.18934	1.47639	1.69713	2.05	2.65	2.85	3
1.06812	1.35567	1.58334	1.9	2.4	2.75	2.8
0.886652	1.16552	1.34042	1.65	2.3	2.7	2.75
0.769662	0.966865	1.16671	1.45	2.25	2.55	2.6
0.729365	0.879544	1.0911	1.35	2.15	2.5	2.65
0.787709	0.971174	1.19621	1.45	2.25	2.65	3
0.916351	1.11123	1.32884	1.55	2.4	2.8	3.1
0.949205	1.10307	1.3347	1.6	2.5	2.9	3.1
0.924588	1.05615	1.32784	1.65	2.6	2.85	3
0.906924	1.02765	1.29572	1.6	2.45	2.6	2.85
1.03965	1.1954	1.44413	1.75	2.55	2.85	3.05
1.11993	1.2861	1.57975	1.9	2.6	3.1	3.1
0.882533	1.00445	1.26312	1.55	2.25	2.7	2.65
0.722624	0.85588	1.0342	1.25	1.9	2.05	2.05
0.657465	0.800456	0.928608	1.1	1.6	1.7	1.85
0.594807	0.699429	0.836389	1	1.6	1.8	2.2
0.72106	0.818805	1.00169	1.15	1.85	2.1	2.45
0.915493	1.01544	1.2715	1.5	2.15	2.4	2.5
1.01829	1.12254	1.43119	1.7	2.2	2.35	2.55
0.948181	1.0342	1.28648	1.5	2	2.2	2.6
0.776342	0.862595	1.06008	1.25	2	2.2	2.85
0.803263	0.91292	1.13664	1.35	2.3	2.55	3.15
1.16343	1.24685	1.57518	1.75	2.65	2.9	3.2
1.32938	1.4314	1.8419	1.95	2.6	2.8	2.95
1.07315	1.18135	1.52788	1.7	2.25	2.45	2.5
0.824433	0.918391	1.1502	1.3	1.9	2.05	2.1
0.782535	0.841234	1.07949	1.2	1.75	1.9	2.1
0.964138	1.04673	1.33095	1.45	1.85	1.95	2.3
1.14213	1.31718	1.60187	1.6	2.05	2.25	2.35
1.08743	1.23758	1.5509	1.45	2.05	2.25	2.2
0.942433	1.09121	1.37423	1.35	1.85	1.95	2.25
0.954073	1.09434	1.37956	1.45	1.95	2.15	2.7
1.17157	1.29471	1.68636	1.75	2.3	2.6	3.15
1.23232	1.37315	1.72781	1.85	2.4	2.7	3.25
1.15144	1.31035	1.67088	1.9	2.6	2.9	3.35
1.17836	1.39675	1.79326	2.05	2.75	3.1	3.5
1.34685	1.53203	1.96505	2.15	3	3.5	3.8
1.47006	1.64985	2.12669	2.3	3.2	3.8	4.05
1.18191	1.36521	1.73145	2	2.7	3.5	4.05
0.944677	1.0788	1.40205	1.7	2.45	3.25	4
0.927229	1.02507	1.38557	1.7	2.45	2.85	3.4
0.946479	1.039	1.39105	1.65	2.35	2.75	3.15
1.02335	1.21455	1.57868	1.65	2.3	2.75	3.35
1.35216	1.48921	1.98138	1.9	2.55	2.8	3.1
1.42641	1.5018	2.00363	1.9	2.5	2.65	2.7
1.16051	1.28585	1.59211	1.55	2.1	2.4	2.75
1.18434	1.3315	1.70225	1.6	2.25	2.6	2.95
1.15826	1.27562	1.72825	1.75	2.45	2.6	2.95
0.993038	1.06319	1.37357	1.55	2.15	2.3	2.8
0.946187	1.04043	1.33123	1.35	1.8	2.1	2.6
1.17104	1.37088	1.67512	1.5	1.95	2.45	2.75
1.19701	1.42663	1.75779	1.55	2	2.65	3.05
1.07215	1.25448	1.63944	1.55	2.1	2.65	3.2
1.04026	1.1869	1.52661	1.55	2.15	2.65	3.05
1.39888	1.57634	2.06631	1.85	2.65	3.15	3.45
1.59032	1.80476	2.38647	2.05	3.1	3.55	3.95
1.31849	1.44813	1.84619	1.85	2.7	3.3	3.75
1.4453	1.5843	1.98506	2	2.75	3.35	3.65
1.51642	1.70528	2.1893	2.05	2.95	3.3	3.45
1.23237	1.38927	1.83126	1.7	2.5	2.7	2.85
1.16219	1.27926	1.6366	1.55	2.15	2.45	2.7
1.23985	1.41732	1.81394	1.75	2.3	2.5	2.65
1.037	1.22698	1.58448	1.5	2.05	2.15	2.4
1.06726	1.10067	1.46075	1.3	1.9	2.05	2.35
0.992836	1.02119	1.38672	1.25	1.75	1.8	2.15
0.732442	0.812134	1.03481	1	1.45	1.55	2
0.799146	0.805354	1.00211	0.95	1.65	1.9	2.2
0.986243	0.983188	1.27162	1.2	1.95	2.25	2.4
1.05022	1.14852	1.48016	1.35	2	2.25	2.25
0.871544	1.06645	1.29411	1.2	1.8	2	2.05
0.781751	1.01351	1.22092	1.15	1.75	1.95	2.1
0.809838	1.05367	1.29578	1.25	1.9	2.05	2.15
0.676355	0.846632	1.02296	1.1	1.65	1.7	1.9
0.549082	0.664219	0.810198	0.85	1.35	1.45	1.8
0.683314	0.833825	1.04486	1	1.5	1.9	2.3
0.980078	1.19714	1.46711	1.4	1.95	2.35	2.55
1.17185	1.34334	1.59082	1.5	2.1	2.25	2.2
1.10032	1.10425	1.36186	1.3	1.9	2	2
0.883793	0.841562	1.06642	1.15	1.7	1.8	2.05
0.923028	0.914211	1.12764	1.2	1.75	1.85	2.15
0.967857	1.0163	1.33149	1.35	2	2.15	2.45
0.970163	1.05134	1.46316	1.55	2.2	2.35	2.75
1.06959	1.14685	1.66513	1.65	2.15	2.3	2.7
1.2573	1.60462	2.08386	1.85	2.35	2.35	2.45
1.30377	1.51363	1.89286	1.75	2.15	2.45	2.6
1.28678	1.44323	1.82956	1.75	2.15	2.5	2.9
0.98634	1.20188	1.56613	1.65	2.2	2.55	3.05
1.13023	1.29714	1.71597	1.9	2.55	3	3.4
1.3685	1.51873	2.00778	2.2	2.95	3.5	3.75
1.3728	1.6351	2.09152	2.25	2.95	3.4	3.8
1.67202	2.00019	2.45764	2.45	3.05	3.45	3.95
1.71768	1.91579	2.42326	2.4	3.15	3.65	4
1.38412	1.49568	2.10822	2.2	3.05	3.6	3.95
1.3035	1.46149	1.93676	2.1	2.75	3.25	3.7
1.3015	1.4598	1.77132	2.1	2.7	3.25	3.9
1.43924	1.5985	2.03456	2.4	3.25	3.9	4.4
1.43522	1.59325	2.02868	2.4	3.45	4.1	4.1
1.19479	1.32327	1.69932	2	2.95	3.45	3.35
1.02082	1.13909	1.44085	1.65	2.5	2.8	2.85
0.791924	0.887551	1.0915	1.3	2.25	2.45	2.6
0.593317	0.693847	0.860564	1.05	2	2.15	2.3
0.583205	0.707291	0.864577	1.05	1.75	1.8	2.1
0.617775	0.747255	0.922693	1.1	1.65	1.65	2.1
0.579841	0.700483	0.835361	0.95	1.5	1.6	2
0.596997	0.689099	0.823426	0.9	1.6	1.7	2.1
1.01599	1.13392	1.42844	1.6	2.5	2.55	2.75
1.30027	1.53673	1.96042	2.1	3	3.15	3.1
1.20536	1.46615	1.79902	1.95	2.7	2.75	2.75
0.950132	1.10864	1.37522	1.55	2.05	2.05	2.25
0.737066	0.832568	1.12024	1.1	1.55	1.7	2
0.83852	1.01216	1.33611	1.25	1.75	1.95	2.2
0.952856	1.18657	1.53317	1.4	1.95	2.05	2.35
0.930452	1.06539	1.39313	1.25	1.9	2.05	2.5
1.14656	1.26571	1.7201	1.55	2.2	2.4	2.65
1.38144	1.55942	2.03791	1.8	2.35	2.35	2.45
1.16263	1.3034	1.62475	1.55	2.05	2	2.25
0.892278	0.953211	1.16077	1.3	1.8	1.85	2.05
0.87785	0.950836	1.18825	1.3	1.9	2	2.2
1.14503	1.29088	1.64955	1.6	2.25	2.5	2.8
1.4977	1.64305	2.22651	2	2.65	3	3.2
1.62641	1.74536	2.4599	2.1	2.8	3.1	3.15
1.42986	1.60707	2.20788	1.85	2.4	2.75	2.9
1.2204	1.44882	1.93579	1.7	2.15	2.5	2.6
1.13559	1.29814	1.70257	1.65	2.25	2.55	2.55
1.06283	1.21074	1.51804	1.55	2.25	2.5	2.65
0.98544	1.14361	1.4088	1.45	2.1	2.3	2.5
0.921923	1.07806	1.36846	1.4	2.05	2.35	2.6
0.781148	0.901188	1.19399	1.3	2	2.35	2.7
0.707052	0.840356	1.06659	1.3	1.9	2.2	2.55
0.746568	0.923102	1.11935	1.4	1.95	2.25	2.45
0.696987	0.851937	1.05517	1.35	2	2.1	2.4
0.620347	0.750825	0.923383	1.15	1.8	1.75	2.3
0.657135	0.774637	0.971162	1.2	1.8	1.85	2.4
0.692238	0.810131	1.01112	1.25	2	2.15	2.45
0.564197	0.666381	0.838933	1.05	1.95	2.05	2.35
0.476238	0.560786	0.721326	0.9	1.65	1.8	2.2
0.551016	0.635199	0.809403	0.95	1.6	1.8	2.05
0.716504	0.83055	1.04477	1.2	1.95	2.1	2.45
0.813603	0.964809	1.16687	1.35	2.45	2.85	3.2
0.936124	1.10076	1.31604	1.6	2.8	3.35	3.45
1.00549	1.17342	1.39538	1.7	2.65	3.2	3.35
1.05231	1.21458	1.47971	1.75	2.65	3.05	3.2
1.01149	1.14483	1.47198	1.75	2.55	2.75	2.8
0.854531	1.02227	1.28052	1.5	2.3	2.5	2.75
0.909396	1.15072	1.34008	1.6	2.5	2.8	3.2
0.993548	1.22204	1.44624	1.8	2.75	3	3.3
0.802072	0.956443	1.22584	1.55	2.25	2.4	2.5
0.612328	0.72647	0.924526	1.1	1.4	1.6	1.65
0.516738	0.605113	0.714612	0.75	1	1.15	1.35
0.487775	0.593638	0.722879	0.75	1	1.1	1.45
0.540542	0.663111	0.81199	0.9	1.25	1.4	1.85
0.682157	0.849651	0.986712	1.15	1.75	2	2.5
0.861951	1.06039	1.22981	1.45	2.2	2.45	2.75
0.852341	1.04627	1.21213	1.45	2	2.15	2.3
0.647737	0.813174	0.939042	1.15	1.55	1.6	1.9
0.520109	0.608002	0.74784	0.9	1.35	1.35	1.65
0.540955	0.594398	0.715417	0.85	1.3	1.2	1.4
0.459329	0.509161	0.591364	0.7	1.15	1.05	1.2
0.397411	0.467336	0.54953	0.6	1	0.95	1
0.325237	0.395919	0.449378	0.5	0.9	0.8	0.8
0.486719	0.585333	0.749824	0.8	1.3	1.6	2.05
0.682516	0.782381	0.963106	1.1	1.75	2.2	2.25
0.753976	0.872253	1.03875	1.2	1.9	2.15	2.15
0.655993	0.800707	0.946581	1.1	1.85	2.05	2.3
0.655324	0.771632	0.926928	1.1	1.85	2.1	2.45
0.554921	0.645473	0.790051	1	1.75	1.85	2.05
0.485163	0.577096	0.691243	0.85	1.65	1.65	1.8
0.647907	0.801913	0.988391	1.15	1.9	2	2.05
0.815311	0.970418	1.19346	1.4	2	2.2	2.3
0.727848	0.837538	0.991961	1.2	1.8	2	2.2
0.570897	0.702884	0.82387	1.05	1.7	1.8	1.85
0.460302	0.576216	0.666795	0.85	1.45	1.45	1.6
0.379492	0.449809	0.524603	0.65	1.2	1.25	1.55
0.280477	0.338246	0.398811	0.5	1.2	1.25	1.55
0.403038	0.463282	0.582798	0.75	1.65	1.75	2.1
0.714324	0.80735	0.994794	1.25	2.1	2.45	3
0.776497	0.936659	1.11993	1.4	2.15	2.55	3.05
0.799843	1.0069	1.17698	1.45	2.2	2.55	2.9
0.738739	0.937552	1.08975	1.3	1.85	2.2	2.65
0.557213	0.713411	0.859412	1.05	1.65	1.9	2.25
0.662613	0.813215	0.974795	1.2	2	2.2	2.6
0.861459	1.03733	1.25082	1.5	2.35	2.65	3
0.882386	1.06412	1.29708	1.65	2.6	3.15	3.55
1.03169	1.2258	1.47875	1.9	2.7	3.35	4
1.19777	1.45169	1.73141	2.1	2.85	3.4	3.85
1.14487	1.40015	1.65613	2.05	2.75	3.15	3.55
1.00277	1.19681	1.42042	1.8	2.6	3	3.4
1.0989	1.35814	1.62219	2	3.05	3.55	3.85
1.32184	1.61243	1.94511	2.35	3.45	3.9	3.95
1.30302	1.63381	1.89136	2.3	3.25	3.65	3.65
1.11782	1.4323	1.63107	2	2.7	2.95	3.25
1.02644	1.23397	1.4684	1.75	2.5	2.95	3.45
1.25938	1.46082	1.79029	2.2	3.25	3.9	4.55
1.31432	1.53762	1.92692	2.45	3.55	4.05	4.65
1.09396	1.35639	1.65835	2.1	3.1	3.7	4.3
1.27699	1.54175	1.84675	2.25	3.4	4	4.4
1.42359	1.66011	1.96879	2.35	3.3	3.75	3.85
1.15504	1.3631	1.59799	1.85	2.6	2.95	3.2
1.04326	1.21824	1.47847	1.7	2.45	2.75	3.25
0.993165	1.17846	1.4464	1.75	2.55	3	3.75
1.03406	1.27877	1.5081	1.85	2.8	3.6	4.4
1.48469	1.84307	2.17086	2.55	3.55	4.35	5.25
1.70619	2.08337	2.52726	3	4.2	4.95	5.7
1.67928	2.07398	2.50803	3.05	4.45	5.35	5.7
1.75279	2.21115	2.59002	3.15	4.4	5.35	5.8
1.74847	2.17748	2.57391	3.15	4.2	5	5.4
1.62889	1.98666	2.44673	2.95	3.9	4.4	4.55
1.51319	1.87366	2.20559	2.6	3.35	3.95	4.3
1.39905	1.79031	2.05432	2.5	3.3	3.95	4.55
1.27646	1.65746	1.95124	2.45	3.55	4.1	4.65
1.34985	1.73662	2.01915	2.45	3.45	4	4.45
1.29612	1.63299	1.9335	2.35	3.2	3.7	4.2
1.22977	1.55455	1.83603	2.25	3.3	3.7	4.4
1.34786	1.65439	2.00872	2.4	3.65	4.15	4.65
1.378	1.69681	2.07194	2.5	3.65	4.4	4.8
1.39178	1.77604	2.1355	2.65	3.6	4.2	4.75
1.35434	1.71671	2.07363	2.6	3.4	3.85	4.3
1.15669	1.41934	1.71672	2.1	2.95	3.4	4
1.06739	1.29119	1.57615	1.95	2.95	3.3	3.95
1.11009	1.36125	1.63931	2.05	2.85	3.1	3.55
1.1175	1.42347	1.6497	2	2.6	2.95	3.5
1.15498	1.47009	1.7026	2.1	2.8	3.35	3.75
1.31277	1.63106	1.9636	2.4	3.2	3.65	3.7
1.31004	1.66915	2.01502	2.4	3.15	3.4	3.45
1.00561	1.27052	1.54182	1.9	2.55	2.75	3
0.830476	1.03213	1.25679	1.6	2.3	2.5	2.9
0.906538	1.11963	1.35295	1.65	2.45	2.6	2.9
0.882554	1.0775	1.31083	1.55	2.3	2.45	2.85
0.928603	1.11858	1.35487	1.6	2.5	2.95	3.55
1.35044	1.67535	1.91581	2.3	3.25	3.8	4.35
1.52484	1.91624	2.20824	2.65	3.3	3.65	4.05
1.2352	1.50003	1.84044	2.3	2.95	3.4	3.9
1.23131	1.4289	1.77807	2.2	3.05	3.65	4.05
1.41677	1.63079	2.04523	2.45	3.4	3.95	4.4
1.5325	1.80517	2.25526	2.75	3.8	4.55	5
1.57517	1.86906	2.29158	2.75	3.65	4.45	4.65
1.34204	1.62903	2.01034	2.4	3.15	3.7	4.3
1.15716	1.40973	1.71713	2.05	2.85	3.35	4.2
1.12383	1.34676	1.60855	1.95	2.85	3.35	3.9
1.17678	1.45199	1.76476	2.1	3.05	3.5	3.7
1.10054	1.3769	1.70279	2	3	3.35	3.55
1.04879	1.29593	1.60487	1.95	2.95	3.25	3.6
1.23335	1.53001	1.87358	2.3	3.2	3.45	3.9
1.39617	1.71635	2.15661	2.6	3.4	3.7	4.15
1.27771	1.60032	1.96413	2.3	3.05	3.45	3.9
1.11748	1.3892	1.70212	2	2.7	3.05	3.5
1.03222	1.25972	1.54001	1.85	2.55	3	3.3
0.905195	1.14162	1.31255	1.6	2.4	3	3.3
0.923559	1.14458	1.35782	1.65	2.6	3.35	3.85
1.03327	1.25903	1.51721	1.85	2.8	3.5	4
1.06462	1.32558	1.58609	1.9	2.7	3.15	3.75
0.931728	1.1713	1.38621	1.65	2.45	3.1	3.7
1.01943	1.255	1.49015	1.8	2.7	3.55	3.8
1.2554	1.51875	1.89093	2.3	3.15	3.75	3.85
1.24642	1.51261	1.92224	2.4	3.1	3.3	3.7
1.09695	1.36914	1.67969	2.1	2.8	3.15	4.05
1.04185	1.32294	1.5938	1.95	2.65	3.25	4.1
1.03536	1.30139	1.58789	1.95	2.7	3.2	3.75
0.918936	1.1502	1.4201	1.75	2.7	3.1	3.65
0.928472	1.16608	1.4746	1.8	2.65	2.9	3.45
0.949032	1.18951	1.48613	1.8	2.45	2.65	3.1
0.989943	1.20435	1.48184	1.8	2.45	2.65	3.2
1.07736	1.2559	1.56831	1.9	2.65	2.95	3.5
0.978843	1.22709	1.47317	1.8	2.7	3.15	3.6
1.05074	1.38826	1.5926	1.9	2.8	3.45	3.75
1.28044	1.59783	1.82415	2.1	2.95	3.5	3.85
1.37186	1.70434	1.93176	2.25	2.9	3.3	3.95
1.39234	1.69976	1.92838	2.25	3.1	3.55	4.2
1.3012	1.58309	1.83457	2.2	3.15	3.65	4.05
1.03999	1.30923	1.56285	1.9	2.65	3.15	3.45
0.944004	1.15325	1.39124	1.7	2.55	3	3.4
0.937548	1.13529	1.31531	1.6	2.5	3.1	3.6
0.78565	0.986049	1.1227	1.35	2.4	3.05	3.5
0.803048	1.01695	1.2015	1.55	2.5	3	3.3
1.01242	1.26628	1.47511	1.85	2.5	2.85	3.15
0.995026	1.24959	1.47821	1.8	2.45	2.8	3
0.873915	1.07643	1.3012	1.65	2.35	2.8	2.95
0.86706	1.0786	1.23552	1.65	2.5	2.95	3
0.922094	1.19271	1.35384	1.7	2.65	2.95	2.9
0.946826	1.23754	1.46885	1.7	2.45	2.65	2.8
0.936049	1.19391	1.4119	1.7	2.25	2.55	3
0.953361	1.189	1.3723	1.7	2.25	2.75	3.15
0.968182	1.21893	1.43432	1.7	2.45	2.85	3.15
0.994653	1.28783	1.49189	1.75	2.7	2.95	3.15
0.921926	1.20482	1.4248	1.75	2.75	3	3.05
0.846646	1.07031	1.30995	1.6	2.45	2.6	2.8
0.896497	1.09819	1.32608	1.6	2.3	2.7	3.05
0.93593	1.13571	1.35639	1.65	2.4	2.9	3.35
0.898664	1.0668	1.26884	1.55	2.3	2.75	3.1
0.830434	0.964106	1.18235	1.45	2.2	2.8	3.05
0.851243	1.00693	1.21666	1.5	2.45	2.8	2.95
0.923095	1.10044	1.33204	1.65	2.55	2.6	2.6
0.794033	0.97799	1.15682	1.4	1.95	1.9	2.05
0.600959	0.769215	0.823603	1	1.35	1.4	1.7
0.7271	0.880161	1.0318	1.15	1.55	1.75	1.95
0.890326	1.02128	1.2688	1.45	2	2.1	2.15
0.831679	0.982974	1.19763	1.35	1.95	1.95	2.05
0.777094	0.954154	1.15204	1.25	1.75	1.75	2
0.618393	0.742197	0.883625	1.05	1.55	1.75	2.1
0.712207	0.854077	1.02785	1.2	2.05	2.4	2.65
0.993358	1.19418	1.48122	1.7	2.75	3.05	3.15
0.9137	1.09985	1.3969	1.65	2.5	2.85	2.9
0.735739	0.918676	1.11946	1.4	2.05	2.4	2.5
0.667511	0.859478	0.986775	1.2	1.9	2.15	2.35
0.664165	0.840311	0.966073	1.1	1.85	2.05	2.45
0.744737	0.904545	1.06191	1.25	2.1	2.5	2.9
0.978748	1.16985	1.42413	1.7	2.65	3.25	3.7
1.22815	1.52541	1.86413	2.2	3.05	3.55	4.05
1.28772	1.56154	1.96043	2.3	3.05	3.55	4
1.23068	1.48789	1.84843	2.2	2.9	3.35	3.85
1.21702	1.50203	1.81747	2.15	2.75	3.1	3.4
1.10979	1.33297	1.61155	1.9	2.55	3	3.45
1.05671	1.27962	1.53426	1.9	2.7	3	3.5
0.959832	1.20987	1.50621	1.9	2.75	2.95	3.3
0.896339	1.14212	1.46536	1.8	2.65	2.95	3.15
0.979076	1.18851	1.52264	1.85	2.7	2.95	2.95
0.898765	1.08828	1.3677	1.65	2.55	2.8	2.95
0.997447	1.21465	1.44247	1.7	2.55	2.75	2.9
1.02925	1.27381	1.48362	1.8	2.5	2.6	2.7
0.889838	1.10429	1.32081	1.65	2.15	2.3	2.5
0.867309	1.04649	1.24648	1.5	2	2.2	2.4
0.818129	1.01153	1.17344	1.4	2.1	2.35	2.55
0.800473	1.02067	1.201	1.5	2.1	2.55	2.75
0.819112	1.03344	1.21769	1.5	2.1	2.65	2.85
0.880843	1.14646	1.34319	1.65	2.4	2.75	2.95
0.789754	1.05071	1.26131	1.6	2.35	2.65	2.85
0.597584	0.763682	0.919951	1.2	1.9	2.25	2.45
0.669286	0.833187	0.963249	1.25	1.8	1.95	2
0.638908	0.785018	0.889555	1.1	1.6	1.55	1.7
0.457335	0.568754	0.648851	0.8	1.25	1.25	1.55
0.481897	0.597238	0.688785	0.9	1.35	1.4	1.5
0.46673	0.601294	0.688985	0.9	1.45	1.45	1.7
0.515661	0.68403	0.800624	1	1.6	1.7	2.05
0.640441	0.80864	0.952048	1.2	1.65	1.85	2.15
0.565751	0.703437	0.81533	1.05	1.6	1.9	2.25
0.61149	0.780496	0.93235	1.15	2	2.2	2.35
0.688427	0.895509	1.07344	1.3	2	2.1	2.15
0.528634	0.699823	0.804231	1	1.5	1.8	2
0.450076	0.59766	0.6904	0.85	1.3	1.65	1.85
0.439244	0.585107	0.699374	0.85	1.35	1.55	1.6
0.490388	0.62887	0.749476	0.9	1.45	1.6	1.65
0.516583	0.656875	0.797849	0.95	1.45	1.6	1.6
0.52536	0.660816	0.805134	0.95	1.35	1.4	1.35
0.627734	0.757939	0.914268	1.05	1.55	1.9	2.35
1.00158	1.21258	1.43108	1.75	2.6	3.2	3.9
1.3781	1.6757	1.92241	2.4	3.45	4.15	4.6
1.45033	1.8067	2.12091	2.55	3.65	4.3	4.5
1.32942	1.6749	2.03165	2.4	3.25	3.65	3.95
1.07305	1.36894	1.60259	1.95	2.55	2.95	3.65
1.01747	1.28739	1.5204	1.9	2.65	3.15	3.7
1.15197	1.43017	1.79333	2.2	3.1	3.6	3.75
1.13274	1.43261	1.77906	2.15	2.95	3.35	3.5
0.811226	1.04145	1.26834	1.6	2.3	2.65	2.9
0.613886	0.802661	0.872541	1.1	1.65	1.75	2
0.620995	0.760237	0.862756	0.95	1.4	1.5	1.6
0.557437	0.636057	0.835021	0.95	1.45	1.7	1.75
0.46963	0.549382	0.671003	0.85	1.45	1.65	1.9
0.766006	0.982726	1.11722	1.4	2.25	2.55	2.9
1.10651	1.40191	1.62635	2.05	3.05	3.45	3.65
0.986025	1.22292	1.46202	1.85	2.6	2.85	2.95
0.75691	0.935414	1.13292	1.4	2	2.1	2.15
0.58439	0.687998	0.837182	1	1.7	1.75	1.85
0.509913	0.608849	0.712163	0.8	1.3	1.3	1.6
0.377595	0.478837	0.541894	0.6	0.95	1	1.15
0.245565	0.311025	0.348364	0.45	1.05	1.05	1.45
0.456726	0.58968	0.625375	0.8	1.1	1.15	1.4
0.456246	0.601963	0.658758	0.8	1	1.05	1.3
0.444863	0.591133	0.672663	0.8	0.95	1.05	1.2
0.322292	0.42759	0.485668	0.6	0.9	1.05	1.15
0.363401	0.482463	0.553467	0.65	1.1	1.15	1.25
0.61131	0.773758	0.905363	1.05	1.55	1.75	1.8
0.714596	0.85676	1.02696	1.25	1.8	2.05	2.05
0.655491	0.796701	0.90683	1.05	1.45	1.4	1.45
0.341557	0.426116	0.462709	0.5	0.9	0.9	1.1
0.145088	0.180494	0.210609	0.25	0.75	0.95	1.25
0.214846	0.277436	0.342837	0.4	0.9	1.15	1.55
0.366203	0.478507	0.566065	0.7	1.3	1.6	2.05
0.577217	0.716792	0.857893	1.05	1.75	2.05	2.5
0.607055	0.759243	0.927107	1.15	1.95	2.15	2.65
0.652888	0.851152	0.999694	1.3	2.25	2.4	2.75
0.80944	1.03395	1.19237	1.5	2.25	2.45	2.7
0.79478	1.0092	1.16715	1.4	2	2.35	2.5
0.783425	0.988496	1.19149	1.45	2	2.2	2.2
0.679189	0.867268	1.05091	1.3	1.7	1.7	1.8
0.518762	0.673397	0.788401	0.95	1.45	1.5	1.65
0.476671	0.61013	0.718108	0.85	1.45	1.5	1.55
0.409546	0.526984	0.624035	0.75	1.3	1.45	1.45
0.44129	0.554584	0.653433	0.8	1.3	1.6	1.6
0.604389	0.733783	0.833045	1	1.45	1.7	1.7
0.586974	0.732399	0.835802	1.05	1.5	1.6	1.5
0.310741	0.4169	0.444503	0.55	0.8	0.8	0.8
0.161764	0.211009	0.253687	0.3	0.95	1	1
0.292501	0.397964	0.445963	0.55	0.95	1.05	1.15
0.267432	0.356034	0.394377	0.5	0.9	1.2	1.4
0.35314	0.474436	0.568377	0.7	1.25	1.55	1.85
0.490534	0.658359	0.79806	1	1.55	1.7	1.95
0.492948	0.620821	0.796956	1	1.55	1.8	1.95
0.549127	0.645215	0.822358	1	1.75	2.1	2.2
0.650568	0.755029	0.902647	1.1	1.95	2.15	2.25
0.613748	0.747031	0.922533	1.2	1.8	1.9	2.15
0.608704	0.745262	0.924359	1.2	1.65	1.75	2
0.607717	0.745695	0.896973	1.1	1.55	1.55	1.7
0.520185	0.693503	0.803353	0.95	1.35	1.25	1.45
0.468327	0.646493	0.727215	0.85	1.25	1.25	1.4
0.447744	0.602901	0.683064	0.8	1.25	1.4	1.5
0.523406	0.658593	0.790348	0.9	1.45	1.6	1.75
0.76335	0.88844	1.0971	1.3	2	2.25	2.65
0.982989	1.14327	1.37425	1.6	2.45	2.95	3.5
0.995543	1.20067	1.43369	1.6	2.3	3	3.3
0.889712	1.11523	1.34038	1.55	2.15	2.65	2.9
0.926899	1.15406	1.36816	1.65	2.4	2.65	2.85
1.11014	1.37929	1.67092	2.1	2.8	3.25	3.25
1.15056	1.42121	1.70059	2.15	2.75	3.35	3.5
1.01535	1.25201	1.45284	1.8	2.45	2.8	3
0.861618	1.09342	1.25857	1.55	2.25	2.6	2.85
0.83919	1.09572	1.28681	1.6	2.35	3.05	3.55
1.20543	1.57217	1.8883	2.4	3.35	4.2	4.7
1.57337	1.95538	2.34992	2.95	4.15	4.95	5.2
1.52551	1.86939	2.23065	2.85	4	4.55	4.7
1.3039	1.60565	1.88467	2.4	3.4	3.95	4.5
1.16872	1.41582	1.69485	2.15	3.15	3.85	4.45
1.11457	1.36882	1.56944	2.05	2.95	3.45	3.9
0.985301	1.22854	1.37866	1.75	2.55	2.95	3.45
0.904971	1.15878	1.39407	1.7	2.6	3	3.25
0.783179	0.991336	1.29173	1.55	2.5	2.75	2.95
0.675938	0.869309	1.13271	1.4	2.2	2.5	2.95
0.775839	1.05396	1.26119	1.65	2.65	3.2	3.7
1.03074	1.32889	1.57766	2.05	3.3	3.95	4.65
1.35152	1.70607	1.96329	2.45	3.75	4.35	5.2
1.62288	2.05502	2.40828	2.9	4.15	4.75	5.2
1.68581	2.04131	2.4895	3	4.05	4.6	4.75
1.61064	1.93455	2.37684	2.95	4	4.55	4.55
1.561	1.87905	2.34293	2.95	4.05	4.7	4.65
1.48629	1.78782	2.22183	2.8	3.85	4.5	4.75
1.41023	1.7442	2.16907	2.7	3.75	4.5	4.85
1.5138	1.86649	2.30642	2.95	4.1	4.8	5.1
1.60769	1.88909	2.42023	3.05	4.1	4.6	4.8
1.23617	1.43326	1.93116	2.4	3.35	3.9	4.1
0.778462	0.986251	1.33705	1.75	2.7	3.2	3.7
0.703275	0.94826	1.23781	1.6	2.5	2.9	3.4
0.745007	0.973731	1.15241	1.5	2.35	2.75	3.25
0.681089	0.862532	0.977858	1.3	2.1	2.65	3.35
0.826054	1.0454	1.25586	1.6	2.4	3.1	3.75
1.10324	1.37902	1.65859	2.05	2.95	3.5	3.95
1.13096	1.41491	1.6321	2.05	2.95	3.45	3.85
0.970577	1.24162	1.45033	1.85	2.65	3.15	3.55
0.957499	1.2554	1.42575	1.8	2.6	3.1	3.5
1.19926	1.47698	1.70935	2.2	3.1	3.9	4.5
1.47757	1.81201	2.09012	2.65	3.75	4.7	5.25
1.85416	2.29182	2.62688	3.2	4.4	5.25	5.65
2.05808	2.51392	2.91708	3.45	4.6	5.45	5.8
1.71042	2.10147	2.44366	2.9	4	4.7	5.25
1.51776	1.88647	2.2431	2.75	3.8	4.45	5.25
1.53579	1.92307	2.32218	2.85	3.9	4.65	5.15
1.41403	1.7134	2.12194	2.6	3.55	4.1	4.45
1.27794	1.5451	1.89116	2.3	3.1	3.6	4.1
1.17796	1.52094	1.85426	2.3	3.25	3.75	4.1
1.21897	1.60411	1.93279	2.4	3.25	3.7	4.05
1.1711	1.44362	1.75655	2.15	2.9	3.35	4
1.14152	1.34728	1.65401	1.95	2.9	3.45	4.15
1.34202	1.643	1.95822	2.35	3.3	3.85	4.1
1.22194	1.52857	1.7884	2.2	2.9	3.25	3.5
0.932676	1.1769	1.37931	1.65	2.25	2.55	3.15
0.993507	1.21858	1.50073	1.8	2.45	2.85	3.15
0.968568	1.19688	1.45697	1.75	2.4	2.8	2.9
0.831553	1.05795	1.27735	1.6	2.15	2.45	2.5
0.769349	0.95311	1.19535	1.5	1.85	2	2.05
0.749385	0.93247	1.09488	1.3	1.6	1.55	1.7
0.628749	0.804784	0.88183	1.05	1.45	1.5	1.7
0.633168	0.780724	0.887355	1.05	1.6	1.8	1.9
0.794874	0.935675	1.15219	1.35	2.05	2.35	2.3
0.900565	1.10616	1.33262	1.6	2.3	2.6	2.7
0.885602	1.12607	1.3266	1.6	2.3	2.5	2.8
0.850173	1.03021	1.23994	1.5	2.25	2.55	2.7
1.01466	1.18392	1.39472	1.65	2.25	2.55	2.45
0.981227	1.15836	1.37107	1.55	2.1	2.25	2.25
0.739627	0.903582	1.07697	1.25	1.95	2.15	2.35
0.710222	0.855018	1.02922	1.25	1.95	2.45	2.85
0.84897	1.05736	1.32468	1.55	2.15	2.8	3.2
0.922979	1.19345	1.51465	1.75	2.45	2.9	3.3
1.02019	1.29871	1.59733	1.85	2.65	3.15	3.7
1.13641	1.4154	1.68761	2	2.9	3.5	4
1.23064	1.49657	1.7899	2.2	3.1	3.6	3.85
1.30747	1.59187	1.88671	2.3	3.05	3.4	3.6
1.18488	1.45764	1.69516	2.1	2.85	3.2	3.6
1.36668	1.69832	1.87795	2.3	2.9	3.2	3.55
1.32498	1.64504	1.82905	2.15	2.65	2.95	3.2
0.987813	1.18101	1.42195	1.7	2.25	2.6	2.65
0.849174	1.011	1.22998	1.5	2	2.3	2.3
0.807737	0.994417	1.17864	1.4	2.05	2.35	2.5
0.856109	1.07299	1.25966	1.5	2.15	2.3	2.6
0.860795	1.07753	1.26002	1.55	2.25	2.5	2.85
0.943431	1.16002	1.32271	1.65	2.6	3.05	3.3
1.02156	1.27275	1.47783	1.8	2.7	3.15	3.25
1.09069	1.38042	1.62052	1.95	2.75	3.2	3.3
1.11985	1.39892	1.60273	2	2.85	3.3	3.45
1.18529	1.40102	1.62668	2	2.9	3.25	3.35
1.01955	1.17919	1.40719	1.75	2.5	2.85	3
0.784959	0.944876	1.11281	1.4	1.95	2.3	2.4
0.740781	0.885597	1.02614	1.2	1.7	1.95	2.05
0.693603	0.813309	0.973913	1.15	1.7	1.95	2.05
0.661675	0.779944	0.925189	1.15	1.65	1.85	1.9
0.560384	0.677254	0.792275	1	1.4	1.6	1.65
0.549042	0.653926	0.800521	1	1.45	1.65	1.75
0.673236	0.803584	0.938822	1.15	1.6	1.8	1.95
0.666095	0.841713	0.974209	1.15	1.6	1.8	1.95
0.624429	0.82164	0.953075	1.15	1.7	1.85	2.3
1.04217	1.35793	1.57181	2	2.85	3.2	3.65
1.20721	1.53964	1.86785	2.4	3.3	3.85	3.9
0.903212	1.15064	1.44494	1.85	2.65	3.25	3.3
0.904203	1.12962	1.41213	1.8	2.55	3.05	3.2
0.973424	1.15536	1.40989	1.8	2.4	2.7	2.9
0.815531	0.996593	1.19008	1.5	2	2.25	2.6
0.733819	0.945094	1.15123	1.4	1.95	2.2	2.6
0.695254	0.879261	1.09534	1.4	2.35	2.8	3.15
0.721505	0.842442	1.08526	1.4	2.35	2.8	3.35
0.734983	0.877664	1.09753	1.35	2.05	2.25	2.75
0.694492	0.910361	1.07495	1.4	2.15	2.3	2.4
0.57379	0.762738	0.796623	1	1.55	1.45	1.75
0.49426	0.647487	0.785585	1.05	1.65	1.7	1.75
0.452643	0.581693	0.705097	0.9	1.4	1.6	1.75
0.377919	0.509706	0.627873	0.8	1.35	1.65	1.95
0.388199	0.514829	0.656106	0.8	1.4	1.75	2.05
0.446	0.639757	0.779164	0.95	1.65	1.95	2.05
0.543869	0.853122	0.969398	1.25	1.95	2.1	2.1
0.581564	0.880714	0.931704	1.2	1.8	1.9	2.1
0.540898	0.782332	0.782674	1	1.6	1.75	2
0.553165	0.784305	0.821074	1.05	1.6	1.7	1.8
0.500848	0.718906	0.793366	1.05	1.55	1.55	1.65
0.422684	0.615535	0.64596	0.85	1.25	1.3	1.45
0.235306	0.348275	0.357518	0.45	0.95	1.05	1.2
0.306475	0.392294	0.464064	0.55	1.05	1	0.95
0.254591	0.356575	0.422174	0.5	0.8	0.7	0.85
0.0229121	0.05063	0.0709166	0.1	0.6	0.5	0.45
0.0531816	0.111901	0.144691	0.2	1	1	0.95
0.0670172	0.134588	0.178389	0.25	0.85	0.9	0.95
0.153394	0.210477	0.259034	0.35	1.05	1.25	1.55
0.415754	0.525169	0.664359	0.8	1.4	1.6	2.15
0.484814	0.579592	0.696173	0.75	0.95	1.2	1.8
0.295704	0.382927	0.49655	0.6	1.25	1.65	2.25
0.369587	0.623389	0.862065	1.15	1.8	2.05	2.4
0.478299	0.80588	1.17793	1.5	1.9	2.1	2.2
0.412035	0.672064	0.975186	1.2	1.55	1.65	1.8
0.263283	0.462304	0.636066	0.8	1.1	1.35	1.65
0.209597	0.386077	0.557682	0.7	1.15	1.5	1.8
0.371534	0.579994	0.756945	0.95	1.45	1.6	1.95
0.30646	0.534786	0.661325	0.85	1.2	1.6	2
0.113467	0.333675	0.439053	0.55	0.85	1.4	1.9
0.110971	0.372228	0.514776	0.65	1	1.3	1.75
0.156448	0.563758	0.764078	1	1.45	1.65	1.8
0.180488	0.615031	0.884246	1.15	1.7	1.9	1.95
0.232982	0.630632	0.991587	1.1	1.7	2	1.95
0.270554	0.678581	0.991524	1.05	1.65	2	1.9
0.272403	0.631045	0.936233	0.95	1.55	1.8	1.8
0.339279	0.644483	0.976466	0.9	1.45	1.55	1.6
0.305335	0.583925	0.814015	0.9	1.25	1.4	1.65
0.215365	0.494017	0.743114	0.9	1.25	1.45	1.9
0.181432	0.498061	0.759053	0.9	1.45	1.55	1.85
0.134419	0.459418	0.637998	0.8	1.4	1.4	1.6
0.139365	0.416856	0.553797	0.7	1.3	1.35	1.55
0.146655	0.408818	0.519749	0.65	1.2	1.45	1.6
0.129881	0.485307	0.626641	0.8	1.4	1.7	2
0.190249	0.853142	1.10991	1.45	2.2	2.55	2.85
0.258621	1.03192	1.33144	1.75	2.55	2.9	2.95
0.239071	0.895275	1.17447	1.5	2.2	2.45	2.5
0.207296	0.805176	1.08556	1.4	1.95	2.15	2.3
0.215935	0.716444	0.954377	1.25	1.8	2	2.35
0.234362	0.692174	0.953755	1.15	1.9	2.2	2.65
0.241649	0.751619	1.08564	1.3	2.3	2.65	2.9
0.230407	0.763837	1.08011	1.35	2.4	2.7	2.8
0.243989	0.764294	1.05223	1.3	2.25	2.4	2.6
0.24245	0.714364	1.01903	1.25	2.1	2.2	2.55
0.312156	0.796006	1.26016	1.4	2.05	2.25	2.7
0.34251	1.02015	1.46423	1.6	2.25	2.55	3
0.246535	0.905785	1.15676	1.4	2.35	2.75	3.05
0.264665	0.854507	1.18399	1.35	2.35	2.85	3.05
0.322158	0.993784	1.46691	1.55	2.35	2.75	2.9
0.426035	0.990741	1.52216	1.5	2.05	2.4	2.45
0.418468	0.863697	1.36129	1.3	1.65	2.05	2.2
0.39302	0.886013	1.33858	1.25	1.7	2.05	2.3
0.420668	0.959328	1.45209	1.45	1.95	2.25	2.35
0.312962	0.857333	1.32543	1.5	1.85	2	2.15
0.273229	0.785133	1.23621	1.35	1.65	1.8	2.1
0.481881	0.819968	1.21396	1.2	1.65	2	2.2
0.734902	0.953861	1.40925	1.35	1.75	2.1	2.25
0.658048	0.995166	1.53049	1.45	1.65	1.9	2.15
0.528481	0.976417	1.45613	1.3	1.55	1.85	2.05
0.512456	0.985098	1.51562	1.3	1.55	1.9	2.05
0.544489	1.00323	1.62725	1.3	1.75	2	2.15
0.728668	1.17547	1.85002	1.5	2.1	2.35	2.45
0.85912	1.31236	1.87604	1.65	2.25	2.5	2.6
0.965873	1.28785	1.95993	1.65	2.3	2.45	2.5
0.947847	1.24402	2.00892	1.7	2.3	2.4	2.35
0.649377	1.20485	1.87061	1.65	2.2	2.3	2.3
0.367493	1.05106	1.54382	1.5	2.05	2.25	2.4
0.232917	0.837723	1.13209	1.4	2.15	2.4	2.5
0.207325	0.801028	1.08859	1.45	2.3	2.4	2.4
0.189053	0.779416	1.04623	1.35	2	2	2
0.16288	0.657032	0.877779	1.05	1.6	1.6	1.65
0.159446	0.525433	0.723376	0.85	1.35	1.45	1.6
0.202036	0.517676	0.758844	0.85	1.35	1.5	1.65
0.226397	0.519917	0.835456	0.85	1.4	1.45	1.55
0.24851	0.478078	0.774819	0.75	1.2	1.4	1.65
0.35993	0.70891	0.972696	0.9	1.3	1.5	1.8
0.335051	0.844819	1.08609	1.1	1.5	1.5	1.8
0.201769	0.634098	0.832824	1	1.4	1.45	1.75
0.138854	0.478144	0.641392	0.8	1.25	1.3	1.45
0.115579	0.429268	0.569806	0.75	1.35	1.4	1.4
0.138872	0.402733	0.592023	0.75	1.4	1.5	1.6
0.149839	0.415864	0.623987	0.75	1.45	1.6	1.75
0.151034	0.526592	0.766358	1	1.7	1.8	1.8
0.148878	0.559363	0.787287	1.05	1.65	1.65	1.6
0.138373	0.524417	0.695996	0.85	1.35	1.35	1.25
0.103473	0.392157	0.511791	0.6	1.05	1.1	0.95
0.045044	0.111092	0.167127	0.2	0.85	0.95	0.8
0.011641	0.0260199	0.040114	0.05	0.25	0.3	0.3
0.249144	0.549454	0.858057	0.85	1.15	1.2	1.1
0.191942	0.464919	0.73907	0.8	1.1	1.2	1.2
0.305086	0.532469	0.814074	0.8	1	1.1	1.15
0.33139	0.542395	0.71865	0.7	0.85	1	1.2
0.181191	0.392398	0.50936	0.6	0.8	1.05	1.25
0.109936	0.346593	0.489996	0.65	0.85	1.1	1.1
0.0845682	0.321066	0.446096	0.6	0.9	1.05	0.95
0.0760383	0.230347	0.305596	0.4	0.9	0.95	0.95
0.104737	0.23187	0.301223	0.35	0.8	0.8	0.85
0.266112	0.312734	0.42568	0.4	0.75	0.65	0.85
0.0565487	0.136	0.216143	0.25	0.5	0.8	0.85
0.243498	0.293593	0.34356	0.35	0.7	0.8	0.75
0.0258085	0.095769	0.118156	0.15	0.7	0.8	0.85
0.28719	0.452721	0.55153	0.8	1.25	1.05	0.9
0.28761	0.464214	0.563379	0.7	1	0.9	0.95
0.342321	0.419277	0.534334	0.55	0.9	1	0.7
0.583087	0.658048	1.00958	0.9	1.4	1.85	2.1
0.149896	0.217612	0.287074	0.35	0.65	0.8	0.7
0.110231	0.151736	0.194942	0.25	0.9	0.9	0.9
0.0477439	0.21311	0.293674	0.35	0.9	0.65	0.9
0.120195	0.520609	0.709735	0.9	1.4	1.25	1.4
0.143715	0.622256	0.834285	1.1	1.7	1.7	1.75
0.148974	0.616724	0.807836	1.05	1.55	1.65	1.65
0.149206	0.541684	0.762377	1	1.3	1.55	1.6
0.133872	0.436897	0.629165	0.85	1.2	1.4	1.4
0.116014	0.421138	0.544767	0.7	1.05	1.1	1.15
0.128522	0.401729	0.536599	0.65	0.95	0.95	1.1
0.135873	0.563338	0.790479	0.95	1.8	2.3	3.35
0.348547	1.57277	2.18642	2.7	3.9	4.6	6
0.607756	2.10125	2.94374	3.8	5.15	5.85	6.6
0.702576	1.89518	2.69457	3.6	4.9	5.5	5.95
0.617489	1.61092	2.32014	3.05	4.2	4.7	5.3
0.534798	1.50586	2.08521	2.75	3.8	4.25	4.7
0.459256	1.28984	1.76557	2.4	3.3	3.8	4.2
0.454646	1.17141	1.6361	2.25	3.1	3.75	4.1
0.428824	1.14988	1.59832	2.2	3.05	3.85	4.25
0.407695	1.16444	1.61511	2.2	3.15	3.85	4.05
0.419693	1.17084	1.58972	2.15	3.2	3.75	3.8
0.322354	0.870322	1.19831	1.6	2.5	3.1	3.5
0.28505	0.790484	1.09055	1.45	2.3	2.7	3.2
0.30299	0.923087	1.243	1.65	2.5	2.95	3.15
0.319841	1.05428	1.46543	1.85	2.65	3.2	3.55
0.360646	1.17784	1.69131	2.1	3.05	3.55	4.2
0.382376	1.26854	1.82853	2.35	3.55	4.25	4.7
0.413421	1.42688	2.054	2.65	3.75	4.45	4.8
0.381479	1.37246	1.97769	2.55	3.5	4.05	4.55
0.346654	1.13427	1.69367	2.15	2.95	3.35	3.9
0.296426	0.983972	1.42394	1.8	2.55	2.95	3.5
0.276514	0.987672	1.36468	1.75	2.6	3.25	4
0.303054	1.07601	1.5112	1.95	2.7	3.35	3.95
0.276475	1.075	1.4658	1.9	2.65	3.25	3.55
0.253263	0.980223	1.31416	1.65	2.55	3.25	3.85
0.291564	1.22415	1.6281	2	3	3.55	4.25
0.363407	1.49893	2.07624	2.6	3.5	3.85	4.35
0.381652	1.4619	2.11622	2.6	3.5	3.9	4.35
0.342733	1.39598	1.98867	2.45	3.35	3.9	4.15
0.317679	1.22079	1.76669	2.2	3	3.55	3.75
0.286986	1.05608	1.53771	1.9	2.75	3.15	3.5
0.258014	1.01989	1.41613	1.8	2.6	2.85	3.15
0.235697	0.934776	1.31604	1.65	2.25	2.45	2.8
0.214412	0.774199	1.13362	1.45	1.95	2.1	2.5
0.187807	0.681302	0.964963	1.25	1.9	2.1	2.5
0.169901	0.715817	0.942794	1.2	2.05	2.4	2.95
0.239722	0.993875	1.31745	1.7	2.55	2.95	3.35
0.256495	1.06152	1.47817	1.95	2.75	3.05	3.3
0.257326	1.10974	1.50074	1.95	2.75	2.9	3.5
0.309408	1.3218	1.80638	2.3	3.1	3.65	4.05
0.321215	1.39024	1.90898	2.45	3.4	4.25	4.3
0.326067	1.36533	1.88349	2.35	3.15	3.8	4.1
0.334269	1.39895	2.04475	2.45	3.05	3.7	3.9
0.343184	1.49959	2.08127	2.5	3.3	3.9	4.2
0.372344	1.57973	2.1334	2.65	3.7	4.15	4.5
0.358359	1.50366	2.09626	2.65	3.7	4	4.2
0.325269	1.28072	1.85036	2.35	3.15	3.35	3.65
0.364451	1.42323	2.05551	2.55	3.25	3.75	4.2
0.398806	1.62941	2.22375	2.75	3.5	4	4.7
0.350854	1.45338	1.90684	2.4	3.2	3.65	4.35
0.291581	1.16759	1.57386	2	2.95	3.55	4.15
0.297596	1.1475	1.62481	2.05	3.1	3.7	4.45
0.348929	1.35029	1.96626	2.45	3.4	4	4.7
0.359996	1.45667	2.10961	2.65	3.55	4.1	4.45
0.320564	1.36698	1.91234	2.4	3.25	3.75	4.05
0.294921	1.31575	1.7308	2.15	2.95	3.3	3.55
0.295507	1.27635	1.70135	2.15	2.75	2.9	3.05
0.266303	1.02544	1.45863	1.9	2.25	2.35	2.85
0.248607	0.997905	1.37184	1.75	2.25	2.5	2.95
0.236712	0.996762	1.3382	1.65	2.35	2.65	2.95
0.226013	0.917124	1.22003	1.55	2.45	2.8	3.15
0.236049	0.89517	1.22289	1.65	2.6	2.95	3.15
0.233508	0.827216	1.17047	1.55	2.5	2.75	3
0.237101	0.882284	1.17447	1.45	2.45	2.7	3.05
0.230571	0.846617	1.09838	1.3	2.2	2.55	2.95
0.224665	0.717436	0.988817	1.2	2	2.45	2.85
0.193913	0.647954	0.909562	1.15	1.8	2.2	2.65
0.165378	0.581539	0.791828	1.05	1.55	1.9	2.35
0.191318	0.623611	0.77067	1.1	1.6	2.05	2.4
0.22036	0.740602	0.94159	1.3	2	2.4	2.75
0.218869	0.746724	1.02812	1.35	2.15	2.5	2.85
0.192596	0.655019	0.901912	1.2	2.15	2.55	2.7
0.18408	0.601244	0.859294	1.1	2.25	2.7	2.8
0.212543	0.727484	1.03482	1.3	2.3	2.7	3
0.22548	0.851337	1.23623	1.55	2.25	2.55	2.85
0.226982	0.821088	1.17307	1.5	2.15	2.4	2.8
0.265426	1.04297	1.38026	1.8	2.6	2.75	3.15
0.274591	1.18234	1.56037	1.95	2.6	2.85	3.1
0.240616	0.879299	1.20213	1.5	1.9	2.3	2.75
0.374733	0.770884	0.984639	1.2	1.6	1.9	2.4
0.572983	0.711496	0.820086	0.95	1.55	1.85	2.15
0.669716	0.649305	0.748586	0.9	1.8	2.15	2.4
0.755826	0.769277	0.90218	1.1	1.75	2.15	2.6
1.50333	1.54874	1.85835	2.15	2.45	3.3	3.7
1.54068	1.69009	2.02561	2.4	3.15	3.6	3.95
1.37096	1.52199	1.83402	2.15	2.85	3.35	3.9
1.27283	1.41817	1.71795	2	2.7	3.15	3.7
1.2131	1.34753	1.64912	1.9	2.65	2.85	3
1.00622	1.08352	1.31009	1.55	2.15	2.3	2.4
0.885901	0.916925	1.11441	1.35	2	2.2	2.75
1.06779	1.1055	1.31458	1.6	2.5	2.8	3.5
1.24087	1.35905	1.58658	1.95	3	3.4	3.75
1.18445	1.36422	1.63056	1.95	2.95	3.45	3.7
1.35019	1.57916	1.86385	2.2	3.15	3.75	4.15
1.50679	1.68447	2.01527	2.4	3.45	4.15	4.45
1.45454	1.59722	1.91049	2.3	3.3	3.9	4.1
1.36753	1.56352	1.7854	2.1	3.05	3.45	3.75
1.37901	1.58038	1.75857	2.05	2.9	3.4	3.8
1.32215	1.51636	1.67977	2.05	2.7	3.45	3.85
1.17521	1.35234	1.51893	1.85	2.65	3.3	3.75
1.23087	1.40496	1.63724	1.9	2.8	3.25	3.6
1.18262	1.3365	1.58459	1.85	2.55	3.05	3.5
0.99732	1.10843	1.33548	1.65	2.3	2.9	3.55
0.903734	1.01803	1.25084	1.55	2.3	3.1	3.7
1.18003	1.27904	1.52876	1.85	2.7	3.45	3.85
1.30625	1.39055	1.6729	2.1	2.95	3.5	3.7
1.04475	1.15359	1.41267	1.8	2.55	3	3.3
1.02429	1.11435	1.35972	1.65	2.35	2.6	3
1.02049	1.09415	1.34474	1.6	2.45	2.65	3
0.881029	1.00224	1.20704	1.45	2.4	2.75	2.95
0.832125	0.973886	1.12274	1.35	2.15	2.6	2.65
0.766923	0.902419	1.01575	1.2	1.85	2.3	2.3
0.677483	0.784297	0.929559	1.1	1.55	1.85	1.95
0.586792	0.655138	0.792829	0.95	1.3	1.45	1.6
0.560596	0.638241	0.71386	0.85	1.25	1.4	1.55
0.673043	0.764961	0.851759	1	1.45	1.7	2.1
0.762936	0.866596	1.00313	1.2	1.7	2	2.45
0.779464	0.891206	1.02782	1.25	1.8	2.2	2.4
0.904794	1.04402	1.21048	1.45	2.1	2.4	2.55
1.01149	1.17856	1.39755	1.7	2.45	2.7	2.9
1.39841	1.54112	1.85514	2.2	3.05	3.5	4.05
1.91447	2.10046	2.4946	2.9	3.9	4.5	5.2
1.84453	2.10514	2.46672	2.95	4	4.65	5.05
1.55276	1.80755	2.09103	2.5	3.35	3.8	4.15
1.2644	1.41225	1.67893	1.95	3	3.4	3.8
1.06268	1.19818	1.49436	1.8	3.05	3.5	3.8
1.13479	1.31424	1.55868	1.9	2.85	3.3	3.5
1.18056	1.34506	1.54593	1.85	2.65	3.2	3.45
1.1176	1.293	1.50799	1.8	2.5	3.05	3.6
1.24806	1.43383	1.71672	2.05	2.7	3.2	3.95
1.4479	1.66878	2.0083	2.4	3.25	3.7	4.2
1.63611	1.9173	2.22315	2.65	3.65	4.05	4.3
1.74821	2.07585	2.38686	2.8	3.75	4.1	4.4
1.53084	1.75817	2.08527	2.45	3.35	3.7	4.05
1.35338	1.52175	1.82065	2.15	3	3.35	3.5
1.24631	1.44469	1.68338	1.95	2.6	2.95	3.15
1.10353	1.24601	1.47664	1.65	2.3	2.6	2.9
1.01564	1.15722	1.39146	1.55	2.2	2.5	3
0.99438	1.18048	1.36301	1.6	2.3	2.7	3.35
1.15187	1.34934	1.60271	1.95	2.95	3.4	3.7
1.18297	1.38333	1.67764	2	2.95	3.25	3.45
1.02561	1.22022	1.45425	1.7	2.35	2.55	2.9
1.02006	1.25474	1.39656	1.65	2.2	2.6	3
1.265	1.52401	1.65982	1.9	2.65	3.3	3.8
1.46148	1.68909	1.90201	2.2	3.15	3.9	4.25
1.4777	1.72922	1.97147	2.35	3.15	3.7	4.1
1.40079	1.65636	1.88357	2.25	2.8	3.15	3.7
1.29225	1.52541	1.64228	1.85	2.4	2.8	3.3
1.28931	1.49133	1.59496	1.8	2.5	2.95	3.85
1.44425	1.63338	1.8727	2.25	3.1	3.55	4.2
1.38091	1.59035	1.83828	2.25	3.15	3.75	4.15
1.34243	1.53243	1.7195	2.05	2.95	3.7	4.55
1.51505	1.77357	2.01108	2.3	3.1	3.7	4.4
1.5576	1.84004	2.13092	2.5	3.6	4.1	4.75
1.70763	1.95258	2.33593	2.85	4.3	5	5.55
1.91322	2.15836	2.53262	3.05	4.25	4.9	5.25
1.85556	2.09799	2.39787	2.85	3.8	4.3	4.8
1.57096	1.81969	2.14647	2.55	3.55	4	4.55
1.47741	1.67816	2.10679	2.5	3.45	3.9	4.35
1.46648	1.61363	2.03632	2.4	3.2	3.8	4.05
1.38138	1.51089	1.82073	2.15	3.15	3.6	3.75
1.31003	1.40356	1.69674	2	2.95	3.25	3.35
1.04532	1.07494	1.29417	1.5	2.3	2.6	2.7
0.726869	0.765254	0.913857	1.1	1.9	2.15	2.55
0.687795	0.74022	0.884938	1.05	1.75	2.1	2.7
0.710367	0.71405	0.889882	1	1.9	2.3	2.7
0.751898	0.735055	0.922288	1.05	2.15	2.45	2.8
0.819966	0.811256	1.01689	1.2	2.3	2.65	3.15
0.857443	0.92549	1.14999	1.4	2.4	2.75	3.1
0.984919	1.13083	1.35997	1.6	2.4	2.6	2.65
1.01033	1.17641	1.41734	1.6	2.2	2.4	2.45
0.864477	1.01849	1.21717	1.4	1.85	2.05	2.35
0.688107	0.796323	0.935176	1.1	1.45	1.7	2.2
0.619195	0.7328	0.841616	1	1.45	1.75	2.2
0.685507	0.783365	0.920947	1.1	1.95	2.2	2.65
0.87738	0.882612	1.0682	1.2	2.3	2.6	3.05
0.769254	0.713035	0.874548	0.9	1.65	1.75	1.65
0.162366	0.15452	0.189933	0.2	0.45	0.75	0.75
0.857747	1.02846	1.11286	1.3	1.45	1.75	2.7
0.768936	0.859802	0.839337	1	1.1	1.1	1.2
1.0877	1.03013	1.21532	1.35	2.05	2.7	3.2
1.0139	1.02302	1.22104	1.35	2.2	2.55	2.95
1.56925	1.42626	1.77509	1.85	2.6	2.95	3.05
1.18551	1.18544	1.47488	1.6	2.3	2.45	2.55
1.58347	1.39873	1.67859	1.75	2.5	2.85	3.35
1.341	1.25259	1.53472	1.7	2.55	2.9	3.15
1.43351	1.29713	1.5706	1.7	2.5	2.75	2.9
2.888	2.48668	3.03373	2.8	3.85	4.55	5
2.97738	2.75558	3.30961	3.25	4.3	4.95	5.5
2.44696	2.43331	2.91263	3.1	4.2	4.9	5.4
1.68667	1.77331	2.20599	2.5	3.85	4.55	4.8
1.49453	1.48268	1.89761	2.15	3.3	4	4.45
1.56087	1.44558	1.86591	2.15	3.1	3.7	4.4
1.47377	1.45347	1.80713	2.05	3.15	3.65	4.25
1.55637	1.51924	1.85425	2.05	3.2	3.65	4.15
1.63189	1.49544	1.85823	2.05	3	3.55	4.1
1.87263	1.65321	2.05856	2.15	2.9	3.35	3.95
2.21521	1.95112	2.40747	2.35	3.05	3.3	3.65
1.97683	1.6845	2.08166	2	2.65	3	3.15
1.25994	1.20049	1.48611	1.6	2.25	2.4	2.55
0.681939	0.735853	0.887939	1.05	1.55	1.7	1.9
0.516543	0.579699	0.638117	0.75	1.15	1.3	1.6
0.570121	0.611211	0.673555	0.75	1.35	1.6	1.9
0.749303	0.739211	0.876341	0.95	1.65	1.95	2.15
0.908057	0.86608	1.04273	1.15	1.8	2.25	2.7
2.43019	2.06475	2.50989	2.4	3.05	3.45	3.6
1.96528	1.78053	2.19933	2.25	2.9	3.3	3.6
1.73364	1.65082	2.05921	2.1	2.9	3.3	3.5
1.64619	1.57905	1.91874	1.95	2.85	3.3	3.3
1.51404	1.39213	1.72897	1.7	2.55	3	3.1
1.86958	1.67381	1.87662	1.85	2.45	2.85	3.2
1.61706	1.43885	1.77834	1.75	2.35	2.75	3.1
1.77778	1.52057	1.8579	1.85	2.25	2.6	2.75
1.59304	1.4474	1.82239	1.8	2.5	2.7	3.05
1.42431	1.38712	1.71128	1.8	2.85	3.05	3.55
1.07632	1.21555	1.41795	1.65	2.55	2.85	3.25
1.00583	1.15123	1.34348	1.55	2.3	2.5	2.85
1.01769	1.0699	1.27754	1.5	2.25	2.45	3.05
1.00088	1.03934	1.21717	1.45	2.5	3.05	3.8
1.15397	1.23157	1.49188	1.8	3	3.6	4.25
1.24078	1.35086	1.64632	2	2.95	3.55	4.2
1.41777	1.42168	1.72666	1.95	3	3.8	4.6
1.72956	1.62227	1.96784	2.15	3.55	4.4	5.55
1.86953	1.87696	2.31157	2.65	4.2	5.1	6.35
2.04605	2.21357	2.73862	3.2	4.6	5.6	6.5
2.2288	2.52409	2.93312	3.4	4.65	5.55	6.4
2.18846	2.51242	2.87083	3.35	4.6	5.5	6.2
1.95695	2.20907	2.57451	3.05	4.35	5.15	5.55
1.68747	1.91903	2.22517	2.65	3.65	4.3	4.7
1.44143	1.65137	1.92821	2.35	3.1	3.75	4.05
1.1842	1.35812	1.60139	1.95	2.85	3.35	3.85
1.17904	1.3788	1.56839	1.85	2.7	3	3.65
1.26699	1.46675	1.64404	1.95	2.45	2.7	3.2
1.13606	1.29835	1.47635	1.75	2.2	2.6	3.2
1.24776	1.405	1.61343	1.85	2.35	2.85	3.45
1.40345	1.57372	1.82322	2.1	2.85	3.55	4.2
1.56012	1.7516	2.00511	2.35	3.4	4.2	5.2
1.84955	2.09451	2.37884	2.8	4.1	4.9	5.95
2.15827	2.47082	2.79048	3.25	4.65	5.65	6.25
2.23026	2.54674	2.88111	3.4	4.4	5.3	6.05
1.84112	2.09382	2.45421	2.95	3.85	4.5	5.55
1.42714	1.60541	1.92693	2.3	3.3	3.95	4.7
1.30522	1.45761	1.67466	2	2.95	3.65	4.3
1.31427	1.4919	1.69408	2.05	3	3.6	4.15
1.3447	1.54634	1.75634	2.15	3	3.5	3.75
1.34063	1.5204	1.72389	2.1	2.85	3.5	4
1.50671	1.67443	1.96666	2.35	3.25	3.95	4.65
1.70612	1.92597	2.25402	2.65	3.7	4.45	5
1.51098	1.76408	1.99303	2.35	3.45	4.2	4.8
1.45025	1.69416	1.91223	2.3	3.55	4.1	4.6
1.48014	1.69612	1.9508	2.35	3.6	4.15	4.7
1.45187	1.75169	2.01761	2.35	3.55	4.1	4.75
1.37777	1.7747	2.07836	2.4	3.6	4.2	4.95
1.19045	1.51119	1.7987	2.2	3.2	3.8	4.4
1.09653	1.43567	1.6394	2.15	2.9	3.3	3.85
0.995253	1.34932	1.49903	1.95	2.7	3	3.85
0.997447	1.32645	1.50118	1.95	2.85	3.25	4
1.03694	1.45535	1.66012	2.25	3.2	3.85	4.5
1.20263	1.62765	1.9021	2.5	3.65	4.45	4.95
1.30964	1.63829	1.90921	2.4	3.6	4.2	4.4
1.10317	1.3812	1.57587	1.95	2.8	3.15	3.45
1.13871	1.53503	1.64414	1.8	2.55	3.2	3.85
1.88063	2.41646	2.2726	2.3	3.3	3.8	4.1
1.64859	1.96319	2.10654	2.3	3.4	4	4.55
1.58006	1.79629	2.03389	2.4	3.5	4.2	4.55
1.3879	1.67809	1.84902	2.25	3.2	3.7	4.1
1.02189	1.31465	1.48836	1.9	2.75	3.15	3.6
0.805886	1.11644	1.24097	1.55	2.2	2.6	2.9
0.772744	1.09482	1.17663	1.35	2	2.5	2.7
0.911008	1.15155	1.29379	1.55	2.4	3	3.1
1.03406	1.19947	1.35439	1.65	2.5	3.15	3.45
1.01162	1.23094	1.42747	1.75	2.55	3.3	3.7
1.02236	1.36536	1.62376	2	2.95	3.55	3.75
0.986834	1.27942	1.4943	1.8	2.7	3.2	3.5
0.880084	1.08551	1.23739	1.5	2.3	2.75	3.3
0.777236	1.01501	1.13404	1.4	2.3	2.85	3.4
0.764866	1.09713	1.27296	1.6	2.8	3.45	3.95
0.876728	1.2434	1.47379	1.85	3.05	3.55	3.95
0.972244	1.25404	1.45237	1.85	2.7	3.1	3.4
1.05953	1.36583	1.54953	1.9	2.7	3.15	3.6
1.05108	1.49484	1.73752	2.1	3	3.45	3.85
1.01194	1.32131	1.49319	1.85	2.9	3.3	3.5
0.960447	1.1122	1.22338	1.55	2.5	2.8	3
0.641067	0.842436	0.984638	1.25	1.8	1.95	2.4
0.456385	0.629831	0.751444	0.95	1.65	1.95	2.4
0.634436	0.863752	1.05832	1.35	2.35	2.8	2.95
0.814316	1.09928	1.24536	1.6	2.55	2.9	3.1
1.06106	1.65268	1.47236	1.75	2.7	3.1	3.5
1.09808	1.68932	1.62361	1.85	2.75	3.15	3.55
0.853459	1.16603	1.31533	1.6	2.4	2.7	3.2
0.916069	1.38634	1.55246	1.8	2.6	2.95	3.4
0.4935	0.593736	0.658602	0.85	1.2	1.4	2.3
0.742973	0.992722	1.03828	1.2	1.9	2.15	2.8
1.1148	1.42114	1.61518	1.9	2.7	3.1	3.65
1.31675	1.61991	1.92986	2.3	3.3	3.8	4.15
1.21898	1.44456	1.74017	2.15	3.1	3.6	3.8
1.0171	1.25207	1.54204	1.9	2.7	3.15	3.55
0.775959	1.04189	1.27436	1.6	2.4	2.65	3
0.673075	0.935059	1.08758	1.4	2.1	2.4	2.7
0.606647	0.802994	0.937787	1.2	1.8	2.2	2.6
0.531198	0.708361	0.746946	0.9	1.65	1.95	2.25
0.673972	0.920944	0.849653	0.95	1.85	1.9	2.1
0.880614	1.11537	1.0106	1.1	1.95	2.15	2.25
0.633488	0.795827	0.766097	0.8	1.4	1.7	2.3
0.771827	0.94144	0.942878	1	1.85	2.3	2.55
0.930702	1.14041	1.0291	1.05	1.75	1.85	2.1
0.671337	1.00792	1.0956	1.2	2	2.25	2.6
0.941745	1.37437	1.56267	1.65	2.55	2.8	3
1.25596	1.60647	1.66581	1.7	2.45	2.5	2.65
1.10306	1.36366	1.32797	1.45	2.1	2.2	2.3
0.789495	0.977101	0.940813	1.1	1.75	1.95	2.2
0.284435	0.343161	0.40114	0.5	0.85	0.95	0.95
0.394016	0.457958	0.495424	0.6	1.15	1.3	1.7
0.438016	0.534478	0.593419	0.75	1.4	1.6	2.2
0.726572	0.901921	1.00862	1.2	1.9	2.25	2.9
1.00613	1.20802	1.36246	1.6	2.3	2.55	2.7
0.967788	1.13766	1.28208	1.5	2.1	2.3	2.55
0.881232	1.05617	1.17318	1.4	2.05	2.4	3
0.981596	1.18053	1.31464	1.65	2.7	3.35	3.9
1.27351	1.49421	1.71099	2.1	3.3	4	4.45
1.37539	1.68486	1.96754	2.4	3.45	4.05	4.45
1.31512	1.66068	1.93525	2.5	3.6	4.35	4.7
1.33397	1.62076	1.8937	2.45	3.65	4.25	4.45
1.22084	1.54173	1.79685	2.3	3.45	3.8	3.85
1.23975	1.52945	1.68237	2.1	3.05	3.35	3.5
1.18887	1.39309	1.53583	1.85	2.65	3.05	3.3
0.948021	1.11948	1.30742	1.6	2.4	2.75	2.9
0.755242	0.948134	1.06945	1.3	2.1	2.25	2.35
0.628515	0.803704	0.886449	1.05	1.7	1.95	2.1
0.608168	0.726706	0.835286	1	1.65	1.95	2.35
0.908391	1.03247	1.18281	1.4	2.2	2.5	3
1.23326	1.43701	1.64867	1.95	2.75	3.1	3.3
1.09412	1.31851	1.52829	1.85	2.6	2.85	2.8
0.861018	1.03934	1.20055	1.45	2.1	2.4	2.5
0.74701	0.95983	1.15375	1.45	2.15	2.55	2.55
0.67638	0.960724	1.12488	1.5	2.1	2.45	2.2
0.610342	0.813509	0.904292	1.2	1.6	1.9	1.9
0.55608	0.64697	0.735968	0.9	1.25	1.6	1.8
0.425446	0.502933	0.551184	0.65	1.1	1.35	1.45
0.212062	0.254393	0.288235	0.35	1	1.15	1.7
0.499832	0.582871	0.647821	0.8	1.5	1.65	2
0.683604	0.799954	0.902253	1.1	1.75	1.9	2
0.645794	0.746757	0.867076	1.05	1.6	1.75	1.75
0.543681	0.614239	0.686846	0.85	1.45	1.55	1.75
0.564132	0.660833	0.735049	0.9	1.6	1.75	2.1
0.780478	0.908607	0.995689	1.2	1.9	2.15	2.35
0.893183	0.993514	1.0528	1.3	1.95	2.15	2.25
0.799509	0.898269	0.965138	1.15	1.7	1.8	1.9
0.600208	0.743802	0.823102	0.95	1.3	1.3	1.45
0.404294	0.535338	0.581226	0.7	0.95	0.85	1.1
0.279102	0.35553	0.371409	0.45	0.85	0.8	0.9
0.425825	0.536779	0.571177	0.65	1	1.1	0.9
0.437292	0.546411	0.594368	0.7	0.9	1	0.9
0.330418	0.419264	0.474584	0.6	0.9	0.95	0.95
0.293098	0.351411	0.378781	0.45	1	1	1.1
0.369199	0.426975	0.46477	0.55	1.15	1.25	1.35
0.474044	0.541547	0.622947	0.75	1.35	1.55	1.55
0.568586	0.646348	0.746503	0.9	1.6	1.8	1.85
0.836768	0.978965	1.08132	1.3	2	2.3	2.5
0.944936	1.20749	1.34198	1.55	2.2	2.35	2.05
0.935847	1.03894	1.1578	1.4	2	2.15	2.5
0.838911	0.960443	1.05973	1.3	1.95	2.1	2.55
0.88208	0.99836	1.11808	1.3	2.15	2.55	3.05
1.08803	1.18775	1.34984	1.6	2.5	2.95	3.25
1.19437	1.33142	1.52906	1.8	2.65	3.15	3.35
1.29777	1.47202	1.66437	1.95	2.95	3.55	4.05
1.50768	1.71349	1.92244	2.3	3.35	3.85	4.45
1.48713	1.70589	1.98001	2.4	3.2	3.7	4.25
1.30898	1.4931	1.76456	2.15	3.05	3.6	4.35
1.37213	1.57742	1.7775	2.1	3.05	3.6	4.25
1.36569	1.58736	1.71976	2	2.75	3.2	3.8
1.19266	1.38477	1.54463	1.8	2.55	3.05	3.65
1.15153	1.3315	1.54119	1.85	2.65	3.3	3.8
1.23887	1.4271	1.60434	1.95	2.8	3.5	3.85
1.37358	1.5939	1.79462	2.1	3	3.65	4
1.42507	1.6618	1.90306	2.2	3.25	4.05	4.55
1.43593	1.71301	1.94295	2.35	3.45	4.25	4.95
1.53392	1.79041	2.02417	2.45	3.4	4.05	4.8
1.43263	1.63553	1.81349	2.15	2.95	3.5	4.1
1.28702	1.47165	1.5861	1.85	2.5	2.85	3.45
1.22792	1.39666	1.51752	1.8	2.4	2.8	3.35
1.20338	1.38366	1.55114	1.9	2.5	2.9	3.4
1.31596	1.50128	1.72227	2.05	2.65	3	3.45
1.25235	1.42628	1.63701	1.95	2.55	3.1	3.65
1.25971	1.44711	1.64799	1.95	2.6	3.3	3.65
1.25836	1.40871	1.64733	1.95	2.75	3.3	3.45
1.00869	1.12421	1.34201	1.65	2.4	2.85	3.2
0.762975	0.88023	1.00457	1.25	1.9	2.45	2.85
0.716403	0.821559	0.914789	1.1	1.8	2.35	2.75
0.975123	1.11733	1.25962	1.45	2.1	2.65	3.2
1.09087	1.24416	1.42192	1.65	2.35	2.8	3.8
1.25378	1.39659	1.65302	2	2.9	3.4	4.3
1.62441	1.84996	2.09631	2.6	3.5	4.25	4.65
1.81717	2.09974	2.34947	2.9	3.85	4.5	4.85
1.70881	1.92886	2.25161	2.7	3.7	4.35	4.7
1.40614	1.5813	1.83523	2.15	3	3.7	4.15
1.20621	1.39175	1.62976	1.9	2.8	3.4	3.9
1.40695	1.6069	1.88442	2.2	3.15	3.85	4.15
1.61259	1.82177	2.10151	2.45	3.3	4.05	4.45
1.54963	1.7782	2.05124	2.35	3.25	4.05	4.55
1.68115	1.95639	2.18154	2.45	3.3	3.95	4.5
1.79369	2.04287	2.29654	2.6	3.25	3.7	4.35
1.54819	1.73296	1.99926	2.35	3.1	3.6	4.2
1.3971	1.56886	1.80912	2.15	3.05	3.55	4
1.27257	1.45377	1.66904	1.95	2.8	3.3	4.05
1.23083	1.42906	1.59733	1.85	2.65	3.25	4.45
1.40838	1.59247	1.80156	2.05	2.85	3.6	4.7
1.53164	1.75196	1.9956	2.3	3.15	3.75	4.75
1.54997	1.77626	2.02796	2.4	3.15	3.75	4.5
1.47077	1.69641	1.91378	2.25	2.95	3.55	4.1
1.47687	1.74788	1.93176	2.25	3.05	3.55	4.35
[truncated: 6,599 more rows]

## Sheet: willcoxrough
4.76368	5.26728	5.54002	5.95	6.8	7.9	8.75
[truncated: 8,139 more rows]

[truncated: 4 more sheets: willcoxsmooth, lordsburgrough, lordsburgintermediate, lordsburgsmooth]
