# Supplementary material for: Predicting the roughness length of turbulent flows over landscapes with multi-scale microtopography
Source: Copernicus journal article supplement (doi:10.5194/esurf-4-391-2016), 2016-05-19
Supplement: Supplementary file [file esurf-4-391-2016-supplement-title-page.pdf › esurf-4-391-2016-supplement-title-page.pdf]

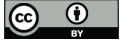

## *Supplement of*

# **Predicting the roughness length of turbulent flows over landscapes with multi-scale microtopography**

**Jon D. Pelletier and Jason P. Field**

*Correspondence to:* Jon D. Pelletier ([jdpellet@email.arizona.edu](mailto:jdpellet@email.arizona.edu))

- [esurf-4-391-2016-supplement-title-page.pdf](#)
- [deathvalleyintermediate.flr](#)
- [deathvalleyrough.flr](#)
- [deathvalleysmooth.flr](#)
- [lordsburgintermediate.flr](#)
- [lordsburgrough.flr](#)
- [lordsburgsmooth.flr](#)
- [readme.txt](#)
- [sodarough.flr](#)
- [sodasmooth.flr](#)
- [willcoxrough.flr](#)
- [willcoxsmooth.flr](#)
- [windprofiles.xlsx](#)

The copyright of individual parts of the supplement might differ from the CC-BY 3.0 licence.
